# Supplementary material for: Microarray Profile of Long Noncoding RNA and Messenger RNA Expression in a Model of Alzheimer’s Disease
Source: MDPI journal article supplement (doi:10.3390/life10050064), 2020-05-14
Supplement: s1 [file s1]

# Supplementary

## Microarray Profile of Long Noncoding RNA and Messenger RNA Expression in a Model of Alzheimer's Disease

Linlin Wang <sup>†</sup>, Li Zeng <sup>†</sup>, Hailun Jiang, Zhuorong Li <sup>\*</sup> and Rui Liu <sup>\*</sup>

Institute of Medicinal Biotechnology, Chinese Academy of Medical Sciences and Peking Union Medical College, Beijing 100050, China; wanglinlin@wfmc.edu.cn (L.W.); zengsheng@imb.pumc.edu.cn (L.Z.); jianghailun@imb.pumc.edu.cn (H.J.)

<sup>\*</sup> Correspondence: lizhourong@imb.pumc.edu.cn (Z.L.); +86-10-8352017; .liurui@imb.pumc.edu.cn (R.L.); Tel.: +86-10-67087731

**Table S5.** Differently expressed mRNAs in the brain of 1-month-old APP/PS1 mice compared with age-matched WT mice.

| Probe Name       | Symbol        | p-Value     | Fold Change | Regulation |
|------------------|---------------|-------------|-------------|------------|
| ASMM9PARTA045052 | Olfr220       | 0.003751036 | 2.4421592   | up         |
| ASMM9PARTA026649 | Gm4858        | 0.041884437 | 2.1697762   | up         |
| ASMM9PARTA025747 | Tshb          | 0.00000521  | 7.7614822   | up         |
| ASMM9PARTA036436 | 2210009G21Rik | 0.013442672 | 2.3971777   | up         |
| ASMM9PARTA037561 | Dbr1          | 0.000113    | 2.0642335   | up         |
| ASMM9PARTA044292 | Zhx2          | 0.002187236 | 2.854121    | up         |
| ASMM9PARTA025730 | Ephb1         | 0.000717    | 2.0853477   | up         |
| ASMM9PARTA024895 | 4930579F01Rik | 0.03686085  | 2.7898862   | up         |
| ASMM9PARTA026372 | Rbm20         | 0.002392128 | 2.387044    | up         |
| ASMM9PARTA030304 | Myos          | 0.003797783 | 3.1414168   | up         |
| ASMM9PARTA028893 | Hnflb         | 0.035493784 | 3.080625    | up         |
| ASMM9PARTA036289 | Ceacam13      | 0.011300727 | 2.136738    | up         |
| ASMM9PARTA028604 | Arhgef2       | 0.02494856  | 2.0964904   | up         |
| ASMM9PARTA039428 | Gucy2c        | 0.018975068 | 2.5197103   | up         |
| ASMM9PARTA033070 | Mknk2         | 0.010417876 | 2.7635362   | up         |
| ASMM9PARTA037710 | Fam81a        | 0.0000496   | 2.2953494   | up         |
| ASMM9PARTA026869 | Dnmt1         | 0.014693277 | 8.319181    | up         |
| ASMM9PARTA037963 | Prss29        | 0.000323    | 4.2877235   | up         |
| ASMM9PARTA035878 | Mapk6         | 0.000305    | 2.8842177   | up         |
| ASMM9PARTA028991 | Slc4a3        | 0.000805    | 3.1703966   | up         |
| ASMM9PARTA022668 | Gm5634        | 0.0000154   | 2.6224368   | up         |
| ASMM9PARTA021305 | G630016D24Rik | 0.032856867 | 4.5807657   | up         |
| ASMM9PARTA024014 | Cdv3          | 0.000221    | 2.0749805   | up         |
| ASMM9PARTA034560 | Kctd20        | 0.04966612  | 2.500376    | up         |
| ASMM9PARTA044936 | Olfr774       | 0.041685455 | 2.1023014   | up         |
| ASMM9PARTA025718 | Cdr1          | 0.000874    | 2.3227308   | up         |
| ASMM9PARTA036648 | Pear1         | 0.010539373 | 4.361214    | up         |
| ASMM9PARTA028213 | Klkb1         | 0.015042135 | 4.822848    | up         |
| ASMM9PARTA027615 | Cdh15         | 0.019219782 | 2.8894737   | up         |
| ASMM9PARTA024198 | Lpp           | 0.000184    | 3.1280704   | up         |
| ASMM9PARTA034297 | Baiap211      | 0.000608    | 9.315259    | up         |

|                  |               |             |           |    |
|------------------|---------------|-------------|-----------|----|
| ASMM9PARTA043897 | Vps39         | 0.004893989 | 2.3448107 | up |
| ASMM9PARTA036860 | 4930432K09Rik | 0.046586692 | 2.4758584 | up |
| ASMM9PARTA033615 | Bhmt2         | 0.012276932 | 6.0526295 | up |
| ASMM9PARTA030930 | Aplnr         | 0.000451    | 2.1038837 | up |
| ASMM9PARTA042888 | Vsig8         | 0.00026     | 2.3886468 | up |
| ASMM9PARTA022787 | Gm5640        | 0.021163333 | 2.170801  | up |
| ASMM9PARTA019730 | Penk          | 0.0000101   | 2.0385914 | up |
| ASMM9PARTA021143 | Defb23        | 0.019433258 | 3.2346437 | up |
| ASMM9PARTA029828 | Cdh5          | 0.001553116 | 2.7611332 | up |
| ASMM9PARTA027701 | Gja8          | 0.047042444 | 5.3950458 | up |
| ASMM9PARTA044055 | Abhd16b       | 0.012498511 | 2.5325136 | up |
| ASMM9PARTA027992 | Gif           | 0.020529864 | 2.3620298 | up |
| ASMM9PARTA024307 | Hsd3b3        | 0.010374174 | 2.7383063 | up |
| ASMM9PARTA041340 | Phc3          | 0.042536356 | 2.196776  | up |
| ASMM9PARTA023813 | Tmem150b      | 0.006467491 | 3.4289734 | up |
| ASMM9PARTA027844 | Gria1         | 0.00000206  | 2.023898  | up |
| ASMM9PARTA032924 | Apbh          | 0.046796106 | 2.0778801 | up |
| ASMM9PARTA034865 | Ssr1          | 0.000238    | 2.055347  | up |
| ASMM9PARTA026193 | Tmem11        | 0.011518378 | 2.1342025 | up |
| ASMM9PARTA021564 | Shroom4       | 0.001165245 | 2.3926134 | up |
| ASMM9PARTA022070 | Olfr455       | 0.00052     | 3.1390016 | up |
| ASMM9PARTA021097 | Trpm3         | 0.001609749 | 3.9606633 | up |
| ASMM9PARTA029691 | Cd44          | 0.04855457  | 2.633932  | up |
| ASMM9PARTA035866 | 1700030J22Rik | 0.026191039 | 2.0290802 | up |
| ASMM9PARTA042588 | Fbxw16        | 0.000124    | 2.104547  | up |
| ASMM9PARTA025516 | Slc17a3       | 0.005393438 | 3.531697  | up |
| ASMM9PARTA023315 | Gatad2a       | 0.01264692  | 2.7757745 | up |
| ASMM9PARTA040420 | Olfr361       | 0.0351323   | 3.0229704 | up |
| ASMM9PARTA030912 | Slc22a3       | 0.009055254 | 2.4426003 | up |
| ASMM9PARTA031792 | Ar            | 0.0457471   | 2.6268723 | up |
| ASMM9PARTA042087 | Fry           | 0.00804436  | 2.0477142 | up |
| ASMM9PARTA043179 | Fam163a       | 0.006152224 | 2.2731571 | up |
| ASMM9PARTA019635 | Whamm         | 0.00001     | 2.3447661 | up |
| ASMM9PARTA035507 | Otop3         | 0.019065587 | 2.7423575 | up |
| ASMM9PARTA041596 | Pskh1         | 0.031563457 | 2.012173  | up |
| ASMM9PARTA031008 | Procr         | 0.005771449 | 2.3010159 | up |
| ASMM9PARTA034391 | 1700011A15Rik | 0.014602835 | 2.8966568 | up |
| ASMM9PARTA042058 | Mon1b         | 0.015270972 | 2.3139317 | up |
| ASMM9PARTA043018 | Ust           | 0.002058796 | 2.2558486 | up |
| ASMM9PARTA036930 | Fam65b        | 0.010708857 | 2.933867  | up |
| ASMM9PARTA031518 | Spnb1         | 0.000164    | 2.6206775 | up |
| ASMM9PARTA020586 | Defb46        | 0.007054768 | 2.1755826 | up |
| ASMM9PARTA042206 | Stk36         | 0.000698    | 3.3935292 | up |
| ASMM9PARTA040424 | Olfr197       | 0.015071325 | 2.1973288 | up |
| ASMM9PARTA022169 | Mki67         | 0.003529784 | 3.030028  | up |
| ASMM9PARTA044228 | Ecel          | 0.001867219 | 2.488216  | up |
| ASMM9PARTA023951 | Grm5          | 0.00349157  | 2.1228971 | up |
| ASMM9PARTA029461 | Vmn2r42       | 0.009567143 | 3.1388469 | up |
| ASMM9PARTA037234 | Pcdh1         | 0.000857    | 3.1323411 | up |
| ASMM9PARTA035876 | Pmvk          | 0.010726194 | 2.721194  | up |
| ASMM9PARTA038992 | Vmn1r16       | 0.000164    | 2.4647965 | up |
| ASMM9PARTA043919 | A430033K04Rik | 0.0000361   | 2.0145612 | up |
| ASMM9PARTA043036 | Klhl18        | 0.011628633 | 3.9553802 | up |
| ASMM9PARTA024704 | Islr2         | 0.00321518  | 2.120134  | up |
| ASMM9PARTA020539 | Ffar3         | 0.006652573 | 2.678523  | up |
| ASMM9PARTA037652 | Nfkbiz        | 0.03210981  | 2.0775528 | up |
| ASMM9PARTA038866 | 1110008J03Rik | 0.001094808 | 2.7508729 | up |

|                  |               |             |           |    |
|------------------|---------------|-------------|-----------|----|
| ASMM9PARTA036549 | Mbd3l1        | 0.028641967 | 3.1825857 | up |
| ASMM9PARTA041772 | Galnt5        | 0.001775296 | 2.5194244 | up |
| ASMM9PARTA019955 | Lrrc52        | 0.002518788 | 3.0269392 | up |
| ASMM9PARTA020417 | Gm5591        | 0.007129067 | 4.217878  | up |
| ASMM9PARTA027610 | Capn5         | 0.010467581 | 2.154866  | up |
| ASMM9PARTA021767 | Rorb          | 0.010541505 | 2.6885617 | up |
| ASMM9PARTA030638 | Apcs          | 0.004201958 | 3.175886  | up |
| ASMM9PARTA023026 | Kng2          | 0.003901125 | 2.04617   | up |
| ASMM9PARTA028084 | Gabrr2        | 0.000542    | 3.4749467 | up |
| ASMM9PARTA037250 | 1600029D21Rik | 0.041963648 | 2.3025756 | up |
| ASMM9PARTA037304 | Ep400         | 0.000563    | 2.3140547 | up |
| ASMM9PARTA030219 | Hoxc13        | 0.004009119 | 2.9702234 | up |
| ASMM9PARTA027534 | Slc7a2        | 0.000575    | 2.1334062 | up |
| ASMM9PARTA033439 | Tsga8         | 0.000414    | 2.9582245 | up |
| ASMM9PARTA019763 | Nlrp14        | 0.045316145 | 2.1160905 | up |
| ASMM9PARTA030257 | Klra8         | 0.023608824 | 2.1983066 | up |
| ASMM9PARTA031864 | Ltbp2         | 0.003326668 | 2.25256   | up |
| ASMM9PARTA025754 | Hnrnpf        | 0.034013495 | 2.1414032 | up |
| ASMM9PARTA044202 | Tnfsf18       | 0.006154811 | 2.7685206 | up |
| ASMM9PARTA027062 | Dcun1d4       | 0.001249509 | 2.9976602 | up |
| ASMM9PARTA039606 | Fcrla         | 0.014220423 | 2.220666  | up |
| ASMM9PARTA033437 | Il21          | 0.02809222  | 2.7552145 | up |
| ASMM9PARTA044252 | BC049730      | 0.011351231 | 2.406666  | up |
| ASMM9PARTA033390 | Rqcd1         | 0.022882305 | 2.7984204 | up |
| ASMM9PARTA033704 | Sync          | 0.004800494 | 3.3473167 | up |
| ASMM9PARTA040166 | Olf122        | 0.003276278 | 3.2400842 | up |
| ASMM9PARTA035380 | Ccdc80        | 0.003335427 | 2.1923726 | up |
| ASMM9PARTA029737 | Dlx5          | 0.000591    | 2.1020262 | up |
| ASMM9PARTA040757 | Olf1214       | 0.018534712 | 2.7296355 | up |
| ASMM9PARTA044593 | Pglyrp3       | 0.0314343   | 2.3026562 | up |
| ASMM9PARTA044605 | Ippk          | 0.000586    | 2.0034702 | up |
| ASMM9PARTA022495 | Ptpaq         | 0.034451496 | 2.2360857 | up |
| ASMM9PARTA024087 | 4930451C15Rik | 0.00000216  | 2.8518217 | up |
| ASMM9PARTA032256 | Chst2         | 0.00000208  | 3.0054355 | up |
| ASMM9PARTA031482 | Slc1a1        | 0.000185    | 2.5802124 | up |
| ASMM9PARTA043529 | Agap1         | 0.006012578 | 2.037107  | up |
| ASMM9PARTA024965 | Ush1c         | 0.006916838 | 2.1530454 | up |
| ASMM9PARTA041952 | Tstd2         | 0.02403953  | 2.0026326 | up |
| ASMM9PARTA035193 | Rnf151        | 0.001736181 | 3.0927174 | up |
| ASMM9PARTA033142 | G6pc2         | 0.039489966 | 2.233592  | up |
| ASMM9PARTA024887 | Ccdc90b       | 0.004433446 | 3.0351093 | up |
| ASMM9PARTA021918 | Gm5347        | 0.013306319 | 2.410623  | up |
| ASMM9PARTA033834 | 2010106G01Rik | 0.000989    | 3.5657985 | up |
| ASMM9PARTA040339 | Olf196        | 0.008369318 | 2.762678  | up |
| ASMM9PARTA035587 | Lcel1d        | 0.047274437 | 2.7813826 | up |
| ASMM9PARTA024383 | Fam5c         | 0.031252425 | 3.781462  | up |
| ASMM9PARTA025288 | Rtdr1         | 0.002890317 | 2.5196795 | up |
| ASMM9PARTA039817 | Ankrd40       | 0.00000341  | 2.186199  | up |
| ASMM9PARTA023477 | Slc14a2       | 0.003879792 | 2.6556864 | up |
| ASMM9PARTA037995 | Clec2h        | 0.002186674 | 2.524383  | up |
| ASMM9PARTA044601 | Abr           | 0.029681418 | 2.072508  | up |
| ASMM9PARTA044144 | Pou2f1        | 0.000792    | 2.0017056 | up |
| ASMM9PARTA040966 | Cxcl17        | 0.009809971 | 3.2530086 | up |
| ASMM9PARTA043668 | Ecd4          | 0.033970255 | 3.3108282 | up |
| ASMM9PARTA030102 | Heph          | 0.003666807 | 2.6783116 | up |
| ASMM9PARTA021695 | Glyctk        | 0.007635023 | 2.0406108 | up |
| ASMM9PARTA037407 | 2310079F23Rik | 0.000254    | 3.4571393 | up |

|                  |               |             |           |    |
|------------------|---------------|-------------|-----------|----|
| ASMM9PARTA042579 | Tmem169       | 0.001039684 | 2.6135087 | up |
| ASMM9PARTA043176 | Klhl23        | 0.001150392 | 2.3827937 | up |
| ASMM9PARTA024222 | Cntfr         | 0.0000176   | 6.269727  | up |
| ASMM9PARTA035572 | Klk5          | 0.021718172 | 2.1237462 | up |
| ASMM9PARTA021180 | Ceacam1       | 0.005726648 | 3.3772664 | up |
| ASMM9PARTA022678 | Prnt4         | 0.013258315 | 2.336178  | up |
| ASMM9PARTA030244 | Gsr           | 0.0000254   | 7.3731484 | up |
| ASMM9PARTA030760 | Prl           | 9.22E-08    | 3.846125  | up |
| ASMM9PARTA043610 | Nlrx1         | 0.04522601  | 2.5623264 | up |
| ASMM9PARTA036875 | Abcb8         | 0.020251606 | 2.6136885 | up |
| ASMM9PARTA030387 | Igf2r         | 0.038781494 | 2.597996  | up |
| ASMM9PARTA020624 | Gal3st3       | 0.004824128 | 2.512867  | up |
| ASMM9PARTA034491 | D14Ert449e    | 0.000000137 | 3.4564073 | up |
| ASMM9PARTA019864 | Olf2r79       | 0.030927038 | 2.2184315 | up |
| ASMM9PARTA020982 | Gm136         | 0.000586    | 2.9435625 | up |
| ASMM9PARTA041163 | Ccdc137       | 0.036690895 | 2.0706782 | up |
| ASMM9PARTA029660 | Colq          | 0.018523209 | 2.5883741 | up |
| ASMM9PARTA033694 | Nup98         | 0.019515885 | 2.3826878 | up |
| ASMM9PARTA034058 | Ospl5         | 0.036261357 | 2.0437946 | up |
| ASMM9PARTA028599 | Rac1c         | 0.04866519  | 2.7203033 | up |
| ASMM9PARTA033905 | Ndc80         | 0.015883194 | 2.1719277 | up |
| ASMM9PARTA030586 | Per2          | 0.000529    | 2.267821  | up |
| ASMM9PARTA024773 | Myef2         | 0.000000148 | 3.5772727 | up |
| ASMM9PARTA037145 | Gsc2          | 0.004948864 | 3.1132085 | up |
| ASMM9PARTA026158 | Gtf2e2        | 0.01296082  | 2.0679715 | up |
| ASMM9PARTA040825 | Olf2r109      | 0.048210464 | 3.3950684 | up |
| ASMM9PARTA020210 | 2700007P21Rik | 0.000301    | 7.393998  | up |
| ASMM9PARTA027898 | Klra5         | 0.006089612 | 2.4630258 | up |
| ASMM9PARTA043849 | Duxbl         | 0.000972    | 3.9733903 | up |
| ASMM9PARTA036484 | Pik2b         | 0.032137237 | 3.231536  | up |
| ASMM9PARTA025140 | Rplb          | 0.005512097 | 2.736371  | up |
| ASMM9PARTA037729 | Apobec1       | 0.005486235 | 3.2105725 | up |
| ASMM9PARTA031745 | Fbxo6         | 0.005948691 | 3.0164595 | up |
| ASMM9PARTA041228 | 9930023K05Rik | 0.0292919   | 2.9537826 | up |
| ASMM9PARTA037840 | Akap12        | 0.00016     | 2.0194292 | up |
| ASMM9PARTA038935 | Ehd4          | 0.020563837 | 2.1692934 | up |
| ASMM9PARTA037836 | F13b          | 0.024273245 | 2.8877404 | up |
| ASMM9PARTA029972 | Lhx8          | 0.0000145   | 2.2731035 | up |
| ASMM9PARTA027224 | Tak3          | 0.000000362 | 2.1145806 | up |
| ASMM9PARTA031132 | Cd70          | 0.00155445  | 2.1202483 | up |
| ASMM9PARTA020973 | Skil          | 0.005644537 | 2.1603162 | up |
| ASMM9PARTA042613 | Pcnx12        | 0.007640276 | 2.8097208 | up |
| ASMM9PARTA024808 | Ttc15         | 0.000000162 | 46.72725  | up |
| ASMM9PARTA025859 | Frem3         | 0.002473361 | 3.018657  | up |
| ASMM9PARTA021040 | Trpm3         | 0.002530899 | 11.01106  | up |
| ASMM9PARTA042786 | Mrgprb2       | 0.001131448 | 3.4861302 | up |
| ASMM9PARTA044237 | Tspan15       | 0.000944    | 2.3455203 | up |
| ASMM9PARTA020181 | Phactr1       | 0.000028    | 2.0741315 | up |
| ASMM9PARTA037352 | Bicd2         | 0.010708182 | 2.6992705 | up |
| ASMM9PARTA022560 | Ncam1         | 0.000199    | 2.0635138 | up |
| ASMM9PARTA032065 | Dcl1          | 0.00000839  | 4.717971  | up |
| ASMM9PARTA020201 | Thoc7         | 0.0000549   | 4.0574574 | up |
| ASMM9PARTA034441 | 4933411K16Rik | 0.020354683 | 2.902926  | up |
| ASMM9PARTA035504 | Spaca4        | 0.02384921  | 2.2065644 | up |
| ASMM9PARTA027033 | Kcnmb3        | 0.01989948  | 2.4002414 | up |
| ASMM9PARTA037326 | 2610028H24Rik | 0.00244168  | 3.2170994 | up |
| ASMM9PARTA037842 | Bglap-rs1     | 0.0000481   | 2.9825518 | up |

|                  |               |             |           |    |
|------------------|---------------|-------------|-----------|----|
| ASMM9PARTA039075 | Cyyr1         | 0.005379924 | 2.5244765 | up |
| ASMM9PARTA031408 | Cdca3         | 0.0000225   | 2.082289  | up |
| ASMM9PARTA021003 | Trpm3         | 0.0000857   | 7.781857  | up |
| ASMM9PARTA030509 | Myl4          | 0.0000416   | 2.0461586 | up |
| ASMM9PARTA020138 | Adcy5         | 0.000197    | 2.2494032 | up |
| ASMM9PARTA044588 | Tas2r117      | 0.043061458 | 2.1725197 | up |
| ASMM9PARTA042118 | Vwa2          | 0.020250231 | 4.088876  | up |
| ASMM9PARTA026891 | Gm5741        | 0.000000244 | 4.2060094 | up |
| ASMM9PARTA043087 | Igsf1         | 0.0485156   | 2.5066066 | up |
| ASMM9PARTA022556 | Pcdh9         | 0.000000213 | 4.2718415 | up |
| ASMM9PARTA026365 | Arpc4         | 0.042895436 | 2.9742742 | up |
| ASMM9PARTA035697 | Prss32        | 0.001030298 | 2.2232764 | up |
| ASMM9PARTA023985 | Ddx4          | 0.009475864 | 2.7534766 | up |
| ASMM9PARTA029020 | Reg2          | 0.028020782 | 2.1968572 | up |
| ASMM9PARTA044758 | Gm12597       | 0.048003875 | 2.2052891 | up |
| ASMM9PARTA041379 | Cpne2         | 0.002771823 | 2.0274973 | up |
| ASMM9PARTA041162 | Asb16         | 0.02493451  | 2.3192282 | up |
| ASMM9PARTA036401 | Ptar1         | 0.008298238 | 2.2376778 | up |
| ASMM9PARTA021422 | Sel1l         | 0.0000113   | 2.8668406 | up |
| ASMM9PARTA041081 | Olfir711      | 0.021222772 | 2.5598984 | up |
| ASMM9PARTA029782 | Dffa          | 0.000119    | 2.0975533 | up |
| ASMM9PARTA029581 | Cga           | 0.000258    | 2.755183  | up |
| ASMM9PARTA025221 | Mapk8ip3      | 0.000253    | 2.0993261 | up |
| ASMM9PARTA038444 | Cysltr2       | 0.028974479 | 2.8222558 | up |
| ASMM9PARTA024458 | Casz1         | 0.000271    | 3.9513557 | up |
| ASMM9PARTA027171 | App           | 0.0000505   | 2.1252465 | up |
| ASMM9PARTA041048 | Olfir1390     | 0.04732841  | 2.7029982 | up |
| ASMM9PARTA019935 | Txlna         | 0.0000531   | 3.7452648 | up |
| ASMM9PARTA043988 | Actl9         | 0.0391684   | 2.271989  | up |
| ASMM9PARTA030282 | Hp1bp3        | 0.003339073 | 2.1426358 | up |
| ASMM9PARTA033144 | Accn5         | 0.004842273 | 2.3114023 | up |
| ASMM9PARTA027749 | Gh            | 0.00000055  | 13.226465 | up |
| ASMM9PARTA041214 | Adam1b        | 0.026432866 | 2.1164045 | up |
| ASMM9PARTA022335 | Cep152        | 0.0222133   | 2.6376128 | up |
| ASMM9PARTA021478 | Kcnh1         | 0.004350807 | 2.7828128 | up |
| ASMM9PARTA020625 | Ttbk2         | 0.04167986  | 2.1556003 | up |
| ASMM9PARTA041481 | Zswim4        | 0.0000592   | 2.4755757 | up |
| ASMM9PARTA044533 | Zfp933        | 0.000000125 | 8.12096   | up |
| ASMM9PARTA029751 | Alox5         | 0.00419579  | 2.0628865 | up |
| ASMM9PARTA031603 | Pde10a        | 0.0000936   | 2.3514514 | up |
| ASMM9PARTA022770 | 4933407P14Rik | 0.003295882 | 2.4269924 | up |
| ASMM9PARTA023801 | 8430427H17Rik | 0.018969456 | 2.158623  | up |
| ASMM9PARTA027306 | App           | 0.00001     | 2.2057827 | up |
| ASMM9PARTA035416 | Galnt15       | 0.010521207 | 2.3042307 | up |
| ASMM9PARTA026471 | Lrtm2         | 0.031467587 | 2.209503  | up |
| ASMM9PARTA022180 | Dscaml1       | 0.02670769  | 2.0475645 | up |
| ASMM9PARTA038806 | Vmn1r24       | 0.021826038 | 2.3893595 | up |
| ASMM9PARTA044769 | Tigd4         | 0.001872062 | 5.801745  | up |
| ASMM9PARTA022310 | Mfhas1        | 0.00000897  | 2.2740405 | up |
| ASMM9PARTA023780 | Bcl2l15       | 0.000124    | 2.7243848 | up |
| ASMM9PARTA035366 | 1700029I01Rik | 0.000387    | 3.0644279 | up |
| ASMM9PARTA030019 | Gast          | 0.001739646 | 2.949806  | up |
| ASMM9PARTA042803 | Auts2         | 0.006495534 | 2.8973548 | up |
| ASMM9PARTA023424 | Fcrl5         | 0.000142    | 4.1270227 | up |
| ASMM9PARTA028168 | Inhba         | 0.03436925  | 2.6375701 | up |
| ASMM9PARTA029724 | Cacna2d3      | 0.0000631   | 2.134954  | up |
| ASMM9PARTA027494 | Bglap         | 0.00000986  | 2.8016675 | up |

|                      |            |             |             |      |
|----------------------|------------|-------------|-------------|------|
| ASMM9PARTA021768     | Slc7a2     | 0.0004      | 2.269368    | up   |
| ASMM9PARTA026984     | App        | 0.00000158  | 2.0835586   | up   |
| ASMM9PARTA044577     | Dand5      | 0.032071725 | 2.0551238   | up   |
| ASMM9PARTA025083     | Macc1      | 0.000177    | 3.927157    | up   |
| ASMM9PARTA044835     | Acsn3      | 0.001409163 | 6.756055    | up   |
| ASMM9PARTA035080     | D14Ert449e | 0.00000825  | 3.3127344   | up   |
| CUST 262 PI426409190 | Gm4133     | 0.02526818  | 2.0456967   | up   |
| ASMM9PARTA020878     | Pak6       | 0.000299    | 2.579196    | up   |
| ASMM9PARTA041636     | Nup214     | 0.019956734 | 2.0582464   | up   |
| ASMM9PARTA026835     | Krtap22-2  | 0.011331555 | 3.007457    | up   |
| ASMM9PARTA027539     | Cacng1     | 0.00000412  | 2.0118864   | up   |
| ASMM9PARTA031494     | Scn11a     | 0.004698082 | 2.6589656   | up   |
| ASMM9PARTA035781     | Prdm16     | 0.024131129 | 3.3408496   | up   |
| ASMM9PARTA025891     | Lekr1      | 0.017828165 | 5.922202    | up   |
| ASMM9PARTA044591     | Plac9      | 0.00000246  | 2.779668    | up   |
| ASMM9PARTA041881     | Ttc34      | 0.001574245 | 2.8212528   | up   |
| ASMM9PARTA025131     | Prl        | 0.000000173 | 3.448135    | up   |
| ASMM9PARTA030978     | Rlim       | 0.0000422   | 2.0607562   | up   |
| ASMM9PARTA032643     | Pdyn       | 0.000359    | 2.0603468   | up   |
| ASMM9PARTA020773     | Bglap2     | 0.000224    | 2.5209253   | up   |
| ASMM9PARTA032408     | Cyp11a1    | 0.000219    | 2.8131297   | up   |
| ASMM9PARTA028968     | Tnnc1      | 0.0000042   | 3.4523382   | up   |
| ASMM9PARTA021777     | A4gnt      | 0.0227427   | 2.0165484   | up   |
| ASMM9PARTA035066     | Ooep       | 0.00222082  | 2.3876872   | up   |
| ASMM9PARTA025377     | Erlin1     | 0.02012964  | 2.2184336   | up   |
| ASMM9PARTA022516     | Neto2      | 0.0000164   | 2.3385117   | up   |
| ASMM9PARTA027293     | Spp1       | 0.000000766 | 0.270835365 | down |
| ASMM9PARTA023986     | Zfat       | 0.010961509 | 0.468865788 | down |
| ASMM9PARTA033120     | Cbln3      | 0.00000213  | 0.13374038  | down |
| ASMM9PARTA039095     | Dbh        | 0.001267741 | 0.487637987 | down |
| ASMM9PARTA031729     | Ccl5       | 0.00069     | 0.283192657 | down |
| ASMM9PARTA027822     | Gch1       | 0.0000267   | 0.427868825 | down |
| ASMM9PARTA035334     | Cthrc1     | 0.000206    | 0.386814544 | down |
| ASMM9PARTA021588     | Gm13152    | 0.0000397   | 0.428907931 | down |
| ASMM9PARTA024173     | Tph1       | 0.04144048  | 0.375018502 | down |
| ASMM9PARTA021442     | Gm13051    | 0.0000463   | 0.340581405 | down |
| ASMM9PARTA030360     | Masp2      | 0.000532    | 0.413983176 | down |
| ASMM9PARTA027888     | Hbb-b1     | 0.002115642 | 0.438872673 | down |
| ASMM9PARTA028818     | Th         | 0.000000812 | 0.179842992 | down |
| ASMM9PARTA029194     | Alox12b    | 0.00000407  | 0.493526414 | down |
| ASMM9PARTA029086     | Ret        | 0.007033648 | 0.37521681  | down |
| ASMM9PARTA035300     | Hddc3      | 0.00000245  | 0.471653484 | down |
| ASMM9PARTA024752     | Gm3604     | 0.000567    | 0.453091381 | down |
| ASMM9PARTA025656     | Dcaf17     | 0.0000438   | 0.464496813 | down |
| ASMM9PARTA037112     | Rpl18a     | 3.13E-09    | 0.064899366 | down |
| ASMM9PARTA027419     | Agt        | 0.00000641  | 0.273542519 | down |
| ASMM9PARTA040089     | Tspan8     | 0.000252    | 0.497196977 | down |
| ASMM9PARTA029936     | Cyp2d9     | 0.0000257   | 0.314010883 | down |
| ASMM9PARTA027054     | Spp1       | 0.00000724  | 0.202091158 | down |
| ASMM9PARTA044859     | H2-Ab1     | 0.0000141   | 0.421966211 | down |
| ASMM9PARTA029513     | Cd3g       | 0.000299    | 0.208552809 | down |
| ASMM9PARTA029838     | Cyp2d10    | 0.002076154 | 0.376422307 | down |
| ASMM9PARTA020724     | Lce3f      | 0.004041684 | 0.300932856 | down |
| ASMM9PARTA023568     | Mup10      | 0.000000858 | 0.40693747  | down |
| ASMM9PARTA024716     | Nek3       | 0.007895443 | 0.400336507 | down |
| ASMM9PARTA028744     | Serpina1c  | 0.0000854   | 0.414697201 | down |
| ASMM9PARTA029778     | Slc6a3     | 0.0000363   | 0.319221478 | down |

|                      |               |             |             |      |
|----------------------|---------------|-------------|-------------|------|
| ASMM9PARTA038671     | D17H6S56E-3   | 0.007374279 | 0.449391082 | down |
| ASMM9PARTA030588     | Pitx1         | 0.001171521 | 0.28862846  | down |
| ASMM9PARTA035824     | Cd209b        | 0.000308    | 0.390840634 | down |
| ASMM9PARTA036237     | Ubiad1        | 0.002128646 | 0.461540776 | down |
| ASMM9PARTA033715     | Foxb1         | 0.00000363  | 0.154075625 | down |
| ASMM9PARTA027255     | Ambp          | 0.0000222   | 0.472511814 | down |
| ASMM9PARTA032497     | Fabp1         | 0.000212    | 0.360369723 | down |
| ASMM9PARTA032626     | Cyp3a25       | 0.0191466   | 0.436343561 | down |
| ASMM9PARTA029223     | Apoa1         | 0.0000916   | 0.331900343 | down |
| ASMM9PARTA023701     | Pcp2          | 0.000104    | 0.197793753 | down |
| ASMM9PARTA039382     | Klhdc8a       | 0.000243    | 0.493643233 | down |
| ASMM9PARTA032773     | Scand1        | 0.044511314 | 0.444243488 | down |
| ASMM9PARTA029910     | Epm2a         | 0.00000628  | 0.043398766 | down |
| ASMM9PARTA030400     | Mab211l       | 0.0000593   | 0.279704648 | down |
| ASMM9PARTA043205     | Mslnl         | 0.000119    | 0.393636876 | down |
| ASMM9PARTA028385     | Hsd3b5        | 0.0000164   | 0.256714015 | down |
| ASMM9PARTA039277     | Cabp7         | 0.019661415 | 0.221170679 | down |
| ASMM9PARTA026754     | Fau           | 0.0000286   | 0.364176895 | down |
| ASMM9PARTA032388     | Hbb-b2        | 0.0000465   | 0.477889099 | down |
| ASMM9PARTA042788     | Eda2r         | 0.002271703 | 0.495996023 | down |
| ASMM9PARTA029855     | Gsta3         | 0.0294203   | 0.457525819 | down |
| ASMM9PARTA028854     | Serpina1b     | 0.000214    | 0.408362146 | down |
| ASMM9PARTA024525     | Rdh7          | 0.003904659 | 0.496537643 | down |
| ASMM9PARTA026597     | Kirrel3       | 0.001898905 | 0.486393909 | down |
| ASMM9PARTA030315     | Slc6a4        | 0.000006    | 0.328893815 | down |
| ASMM9PARTA027693     | F2rl1         | 0.049067512 | 0.473549154 | down |
| ASMM9PARTA041954     | Rln3          | 0.0000998   | 0.26294437  | down |
| ASMM9PARTA040898     | Olfr167       | 0.004060974 | 0.360103214 | down |
| ASMM9PARTA034098     | Emid2         | 0.0000673   | 0.433712847 | down |
| ASMM9PARTA044396     | Cd300lh       | 0.000000384 | 0.22127017  | down |
| CUST 305 PI426409190 | Ccl28         | 0.000896    | 0.364664825 | down |
| ASMM9PARTA021492     | Gbp11         | 0.000191    | 0.485064077 | down |
| ASMM9PARTA042165     | Slc24a5       | 0.000026    | 0.289132192 | down |
| ASMM9PARTA044541     | Xkr8          | 0.00000112  | 0.476201361 | down |
| ASMM9PARTA022794     | Rbm8a         | 0.00000015  | 0.138931236 | down |
| ASMM9PARTA029884     | Gata6         | 0.000221    | 0.346125713 | down |
| ASMM9PARTA024749     | Myef2         | 0.0000299   | 0.077665451 | down |
| ASMM9PARTA027936     | Inadl         | 0.040855188 | 0.486943914 | down |
| ASMM9PARTA036550     | 2410076I21Rik | 0.00018     | 0.285626574 | down |
| ASMM9PARTA040145     | Olfr360       | 0.012411629 | 0.342445277 | down |
| ASMM9PARTA027393     | Alx4          | 0.003925964 | 0.357112605 | down |
| ASMM9PARTA042802     | C730048C13Rik | 0.0000349   | 0.197717588 | down |
| ASMM9PARTA036982     | Trim14        | 0.000158    | 0.202457818 | down |
| ASMM9PARTA021026     | Mef2a         | 0.01771908  | 0.499932884 | down |
| ASMM9PARTA029776     | Dao           | 0.0000532   | 0.092268934 | down |
| ASMM9PARTA029472     | Alb           | 0.000132    | 0.291191922 | down |
| ASMM9PARTA038655     | Ugt2b38       | 0.000787    | 0.349204503 | down |
| ASMM9PARTA023296     | Gm3448        | 0.0000146   | 0.310497803 | down |
| ASMM9PARTA031869     | Ccl7          | 0.001778032 | 0.337732639 | down |
| ASMM9PARTA031126     | Sphk1         | 0.000013    | 0.45064175  | down |
| ASMM9PARTA020376     | Gm5622        | 0.000775    | 0.294413013 | down |
| ASMM9PARTA042036     | Agtr1b        | 0.015565972 | 0.252611166 | down |
| ASMM9PARTA042858     | Gpr81         | 0.0000645   | 0.364822501 | down |
| ASMM9PARTA035197     | Fibin         | 0.000000527 | 0.461992885 | down |
| ASMM9PARTA028012     | Mpzl2         | 0.000413    | 0.435237223 | down |
| ASMM9PARTA032788     | Ear5          | 0.006115099 | 0.362974193 | down |
| ASMM9PARTA033515     | H2-Q8         | 0.000101    | 0.248923871 | down |

|                  |               |             |             |      |
|------------------|---------------|-------------|-------------|------|
| ASMM9PARTA036465 | Cda           | 0.00000179  | 0.376086905 | down |
| ASMM9PARTA033683 | Ms4a4b        | 0.006376007 | 0.369090379 | down |
| ASMM9PARTA037619 | Tlr1          | 0.0000658   | 0.483324811 | down |
| ASMM9PARTA027086 | Spp1          | 0.0000364   | 0.302828051 | down |
| ASMM9PARTA020037 | Arhgef11      | 0.011509744 | 0.191757371 | down |
| ASMM9PARTA027011 | Mup15         | 0.000000154 | 0.407793754 | down |
| ASMM9PARTA026146 | Slc10a1       | 0.001751838 | 0.240444148 | down |
| ASMM9PARTA036813 | 1700011103Rik | 0.046159588 | 0.389570997 | down |
| ASMM9PARTA020699 | Tmem171       | 0.023241505 | 0.445388272 | down |
| ASMM9PARTA033750 | Scel          | 0.01893564  | 0.439891934 | down |
| ASMM9PARTA038738 | Pou4f2        | 0.000000782 | 0.021485966 | down |
| ASMM9PARTA037570 | Abcb5         | 0.011824286 | 0.481956559 | down |
| ASMM9PARTA029488 | Cyp8b1        | 0.000753    | 0.434492972 | down |
| ASMM9PARTA039381 | Ankrd33       | 0.006048001 | 0.481616227 | down |
| ASMM9PARTA030083 | Neurog1       | 0.005889766 | 0.458822073 | down |
| ASMM9PARTA028004 | Hpd           | 0.001849783 | 0.402435783 | down |
| ASMM9PARTA044070 | Exoc8         | 0.0000118   | 0.44342506  | down |
| ASMM9PARTA031095 | Sox14         | 0.0000014   | 0.120169364 | down |
| ASMM9PARTA035055 | Slc47a1       | 0.0000425   | 0.394506808 | down |
| ASMM9PARTA043102 | Vsig4         | 0.018527258 | 0.490885339 | down |
| ASMM9PARTA024271 | Pax3          | 0.012761468 | 0.404511272 | down |
| ASMM9PARTA042808 | Gchfr         | 0.00000138  | 0.153785482 | down |
| ASMM9PARTA036957 | Manf          | 0.000811    | 0.399164692 | down |
| ASMM9PARTA020936 | Calca         | 0.0000178   | 0.411528917 | down |
| ASMM9PARTA027947 | Epyc          | 0.001802313 | 0.329099934 | down |
| ASMM9PARTA020324 | Skap1         | 0.00133955  | 0.243848436 | down |
| ASMM9PARTA030022 | H2-Q10        | 0.0000253   | 0.365611704 | down |
| ASMM9PARTA041084 | Olfir555      | 0.017819004 | 0.457085186 | down |
| ASMM9PARTA024098 | Emp3          | 0.048557542 | 0.492098425 | down |
| ASMM9PARTA044861 | Olfir1349     | 0.009783274 | 0.472811115 | down |
| ASMM9PARTA031618 | Cd3d          | 0.003372742 | 0.277884285 | down |
| ASMM9PARTA026103 | Myt1          | 0.003210547 | 0.41371868  | down |
| ASMM9PARTA025046 | Gm8267        | 0.003713606 | 0.277760695 | down |
| ASMM9PARTA032045 | Uncx          | 0.000868    | 0.111744916 | down |
| ASMM9PARTA020218 | Epb4.1l1      | 0.016178584 | 0.378831172 | down |
| ASMM9PARTA033840 | Pla2g12b      | 0.00000344  | 0.255397507 | down |
| ASMM9PARTA042468 | Tmem132c      | 0.038441814 | 0.472217776 | down |
| ASMM9PARTA031158 | Saa3          | 0.000866    | 0.455177448 | down |
| ASMM9PARTA034658 | Med18         | 0.010337146 | 0.458610453 | down |
| ASMM9PARTA037474 | Tmem210       | 0.006449624 | 0.421148352 | down |
| ASMM9PARTA038575 | Lypd3         | 0.003519286 | 0.398857513 | down |
| ASMM9PARTA040003 | Olfir1325     | 0.000744    | 0.407930795 | down |
| ASMM9PARTA038599 | Cdhr1         | 0.000257    | 0.411554203 | down |
| ASMM9PARTA044750 | Serpib3c      | 0.000307    | 0.377743875 | down |
| ASMM9PARTA041741 | Tph2          | 7.79E-08    | 0.074974417 | down |
| ASMM9PARTA024986 | Clec4d        | 0.011190993 | 0.417291561 | down |
| ASMM9PARTA029274 | Thrb          | 0.042430427 | 0.269124158 | down |
| ASMM9PARTA035865 | Krtap4-13     | 0.000036    | 0.24358465  | down |
| ASMM9PARTA044580 | Trim56        | 0.0000296   | 0.491315097 | down |
| ASMM9PARTA023546 | Serac1        | 0.002654136 | 0.458561558 | down |
| ASMM9PARTA040990 | Rgs13         | 0.01656337  | 0.436844133 | down |
| ASMM9PARTA041433 | Skor1         | 0.012819057 | 0.456959029 | down |
| ASMM9PARTA038106 | Pth2          | 0.00000367  | 0.131878955 | down |
| ASMM9PARTA023902 | Sema6b        | 0.000808    | 0.482857497 | down |
| ASMM9PARTA040340 | Olfir1238     | 0.017646741 | 0.35896544  | down |
| ASMM9PARTA020537 | Eif4e1b       | 0.001858372 | 0.357191958 | down |
| ASMM9PARTA033706 | Rsc1a1        | 0.008604575 | 0.478494564 | down |



|                      |               |             |             |      |
|----------------------|---------------|-------------|-------------|------|
| ASMM9PARTA031047     | Rhag          | 0.014100929 | 0.382919493 | down |
| ASMM9PARTA039138     | Il23r         | 0.000192    | 0.393423424 | down |
| ASMM9PARTA025955     | Vmn1r159      | 0.000553    | 0.448809868 | down |
| ASMM9PARTA025833     | Ankrd55       | 0.00000145  | 0.213764757 | down |
| ASMM9PARTA037766     | Cxcr6         | 0.01597911  | 0.33174342  | down |
| ASMM9PARTA029743     | Epha2         | 0.006307291 | 0.435350078 | down |
| ASMM9PARTA033257     | Doc2g         | 0.000000134 | 0.375884612 | down |
| ASMM9PARTA031013     | Reg3a         | 0.001495296 | 0.480919981 | down |
| ASMM9PARTA031999     | Bhmt          | 0.0000367   | 0.464683259 | down |
| ASMM9PARTA021799     | Pitx2         | 0.001764554 | 0.386329574 | down |
| ASMM9PARTA027018     | Bcl2a1c       | 0.001010992 | 0.463364288 | down |
| ASMM9PARTA027835     | Cyp2f2        | 0.0000198   | 0.429006466 | down |
| ASMM9PARTA031281     | Sgcg          | 0.01973625  | 0.424984445 | down |
| ASMM9PARTA041416     | BC030307      | 0.000474    | 0.47952353  | down |
| ASMM9PARTA037532     | Akr1c21       | 0.001751824 | 0.421506652 | down |
| ASMM9PARTA028812     | Serpina1d     | 0.000353    | 0.401028333 | down |
| ASMM9PARTA030222     | Ifna4         | 0.000351    | 0.41213665  | down |
| ASMM9PARTA028978     | Prox1         | 0.000362    | 0.460240788 | down |
| ASMM9PARTA028931     | Spp1          | 0.0000299   | 0.283136883 | down |
| ASMM9PARTA039158     | Vmn1r75       | 0.0000873   | 0.342131613 | down |
| ASMM9PARTA027757     | Chad          | 0.000333    | 0.42549563  | down |
| ASMM9PARTA030085     | Erf           | 0.018492376 | 0.499463826 | down |
| ASMM9PARTA026853     | 9830107B12Rik | 0.022867063 | 0.417142626 | down |
| ASMM9PARTA030350     | Foxa2         | 0.00000139  | 0.080439357 | down |
| ASMM9PARTA023189     | Zfp385b       | 0.047261067 | 0.392977492 | down |
| ASMM9PARTA022734     | Gm11428       | 0.0000156   | 0.447403592 | down |
| ASMM9PARTA044230     | BC048679      | 0.004698515 | 0.38887786  | down |
| ASMM9PARTA019880     | Olf111        | 0.000821    | 0.456762413 | down |
| ASMM9PARTA019871     | Dnmt3b        | 0.000092    | 0.449614613 | down |
| ASMM9PARTA027981     | Evx1          | 0.0000138   | 0.052216071 | down |
| ASMM9PARTA021692     | Mup3          | 8.37E-08    | 0.308499475 | down |
| ASMM9PARTA030391     | Irx2          | 0.000000204 | 0.031454856 | down |
| ASMM9PARTA044724     | Olf1741       | 0.005040333 | 0.253448021 | down |
| ASMM9PARTA024658     | Birc7         | 0.00000366  | 0.340921333 | down |
| ASMM9PARTA028475     | Pah           | 0.000402    | 0.346199395 | down |
| ASMM9PARTA022918     | Dnahc9        | 0.008782837 | 0.32455683  | down |
| ASMM9PARTA033277     | Cxcl10        | 0.004446081 | 0.471386309 | down |
| ASMM9PARTA038372     | Cd209a        | 0.000857    | 0.439088714 | down |
| ASMM9PARTA020925     | Shisa3        | 0.0000191   | 0.323512727 | down |
| ASMM9PARTA028663     | Prg2          | 0.0000244   | 0.314351926 | down |
| ASMM9PARTA023422     | Arhgef16      | 0.0000113   | 0.322846181 | down |
| ASMM9PARTA041247     | Lrrc45        | 0.027927503 | 0.459389719 | down |
| ASMM9PARTA028666     | Prl7a1        | 0.00000581  | 0.298754118 | down |
| ASMM9PARTA039640     | Chi3l4        | 0.00031     | 0.476187982 | down |
| ASMM9PARTA031052     | Sncg          | 0.00000178  | 0.317175926 | down |
| ASMM9PARTA030826     | Otp           | 0.00000451  | 0.332344873 | down |
| ASMM9PARTA023255     | Col2a1        | 0.0000613   | 0.498609304 | down |
| ASMM9PARTA030228     | Kap           | 0.0000321   | 0.155361164 | down |
| ASMM9PARTA037978     | Msr1          | 0.000596    | 0.457828333 | down |
| ASMM9PARTA044308     | Mrv1          | 0.000125    | 0.493701358 | down |
| ASMM9PARTA023537     | Catsper4      | 0.003237183 | 0.321849911 | down |
| ASMM9PARTA027144     | Mup17         | 0.00000132  | 0.498565279 | down |
| ASMM9PARTA029207     | Tlx2          | 0.008945637 | 0.321060826 | down |
| ASMM9PARTA031089     | Sema6c        | 0.016469039 | 0.461748522 | down |
| ASMM9PARTA031582     | Foxc2         | 0.000000216 | 0.301975995 | down |
| ASMM9PARTA020509     | Vwde          | 0.003051164 | 0.391422002 | down |
| CUST_216_PI426409190 | Testv1        | 0.000509    | 0.49688404  | down |

|                  |               |             |             |      |
|------------------|---------------|-------------|-------------|------|
| ASMM9PARTA040880 | Hrh4          | 0.001494183 | 0.328859139 | down |
| ASMM9PARTA032589 | Tbx21         | 0.000366    | 0.223504727 | down |
| ASMM9PARTA032874 | Rbck1         | 0.001264961 | 0.392780537 | down |
| ASMM9PARTA030041 | Ldb1          | 0.03084223  | 0.425370745 | down |
| ASMM9PARTA044389 | Gse1          | 0.047766864 | 0.493533648 | down |
| ASMM9PARTA025799 | Tmem40        | 0.000768    | 0.387595472 | down |
| ASMM9PARTA020142 | Gm13154       | 0.00000258  | 0.45213455  | down |
| ASMM9PARTA028465 | Mgp           | 0.000959    | 0.470358568 | down |
| ASMM9PARTA034414 | Car13         | 0.000197    | 0.49643855  | down |
| ASMM9PARTA025047 | 1700024P16Rik | 0.0000271   | 0.434459409 | down |
| ASMM9PARTA028583 | Mup2          | 0.0000741   | 0.371776097 | down |
| ASMM9PARTA043495 | Hist1h2ac     | 0.000699    | 0.151374328 | down |
| ASMM9PARTA022033 | Arfp1         | 0.0000288   | 0.420924174 | down |
| ASMM9PARTA031215 | Zscan21       | 0.00057     | 0.460670551 | down |
| ASMM9PARTA031086 | Scnn1g        | 0.000116    | 0.463856101 | down |
| ASMM9PARTA038143 | Lmo1          | 0.001261006 | 0.491758762 | down |
| ASMM9PARTA025291 | Prph          | 0.000385    | 0.443206284 | down |
| ASMM9PARTA020245 | Ear12         | 0.0000513   | 0.347774919 | down |
| ASMM9PARTA026757 | Gm6537        | 0.0000844   | 0.385755634 | down |
| ASMM9PARTA032028 | Chrna4        | 0.0000397   | 0.444166377 | down |
| ASMM9PARTA028822 | Ugt2b5        | 0.000019    | 0.434144039 | down |
| ASMM9PARTA040779 | Zc3h12a       | 0.012332202 | 0.425404348 | down |
| ASMM9PARTA030539 | Anxa1         | 0.000124    | 0.475038553 | down |
| ASMM9PARTA029843 | En2           | 0.000000526 | 0.152041445 | down |
| ASMM9PARTA020689 | C1ql4         | 0.000826    | 0.110243908 | down |
| ASMM9PARTA027052 | Mup14         | 0.000114    | 0.366819086 | down |
| ASMM9PARTA026834 | Kif17         | 0.000303    | 0.495580979 | down |
| ASMM9PARTA027745 | Gabra6        | 0.02647982  | 0.297270374 | down |
| ASMM9PARTA044638 | Dgkq          | 0.000725    | 0.416558014 | down |
| ASMM9PARTA020203 | Gm52          | 0.001634004 | 0.378973202 | down |
| ASMM9PARTA021544 | Mup2          | 0.000031    | 0.482484021 | down |
| ASMM9PARTA037771 | Tcfap4        | 0.03489789  | 0.365331942 | down |
| ASMM9PARTA021929 | Myst3         | 0.035654817 | 0.449276261 | down |
| ASMM9PARTA027159 | Car3          | 0.000916    | 0.472998189 | down |
| ASMM9PARTA028274 | Foxa1         | 0.0000641   | 0.04409557  | down |
| ASMM9PARTA044658 | C1ql2         | 0.000000539 | 0.291101468 | down |
| ASMM9PARTA032061 | Casp9         | 0.000298    | 0.391780231 | down |
| ASMM9PARTA025578 | Ucma          | 0.015660925 | 0.392897004 | down |
| ASMM9PARTA032995 | Sec1          | 0.000187    | 0.47915595  | down |
| ASMM9PARTA037618 | Akr1c6        | 0.000444    | 0.374077842 | down |
| ASMM9PARTA019886 | Mup21         | 0.002456202 | 0.374074498 | down |
| ASMM9PARTA027253 | Gpr182        | 0.000607    | 0.382188459 | down |
| ASMM9PARTA029960 | Irx1          | 0.00000197  | 0.101702898 | down |
| ASMM9PARTA038073 | Bbox1         | 0.002758299 | 0.352427876 | down |
| ASMM9PARTA038178 | Tshz2         | 0.0000161   | 0.496786808 | down |
| ASMM9PARTA035483 | Cd209g        | 0.000181    | 0.430250685 | down |
| ASMM9PARTA030847 | Slc34a1       | 0.028431648 | 0.457368876 | down |
| ASMM9PARTA029298 | Ch25h         | 0.0000136   | 0.326547108 | down |
| ASMM9PARTA028551 | Tnfrsf11b     | 0.019162202 | 0.411245255 | down |
| ASMM9PARTA023494 | Wtap          | 0.000156    | 0.054112785 | down |
| ASMM9PARTA039049 | Fut10         | 0.0000154   | 0.45058989  | down |
| ASMM9PARTA036766 | Dmgdh         | 0.008427964 | 0.448133821 | down |
| ASMM9PARTA028990 | Slc22a1       | 0.018043306 | 0.486755339 | down |
| ASMM9PARTA042640 | Mael          | 0.0000309   | 0.306909876 | down |
| ASMM9PARTA027349 | LOC100048884  | 0.00000302  | 0.461396479 | down |
| ASMM9PARTA037449 | Sucnr1        | 0.002563587 | 0.389406356 | down |
| ASMM9PARTA030926 | Xdh           | 0.00000699  | 0.288572456 | down |

|                  |               |             |             |      |
|------------------|---------------|-------------|-------------|------|
| ASMM9PARTA031728 | S100a8        | 0.00055     | 0.468861941 | down |
| ASMM9PARTA020403 | Mup20         | 0.0000229   | 0.276195118 | down |
| ASMM9PARTA032320 | Vpreb2        | 0.04752366  | 0.292196746 | down |
| ASMM9PARTA025706 | Trim45        | 0.017479895 | 0.426420794 | down |
| ASMM9PARTA029800 | Cd83          | 0.007302238 | 0.488898102 | down |
| ASMM9PARTA031250 | Plscr1        | 0.00000565  | 0.433983607 | down |
| ASMM9PARTA023085 | Krtap17-1     | 0.041328    | 0.461730613 | down |
| ASMM9PARTA027595 | Foxd4         | 0.000648    | 0.206476166 | down |
| ASMM9PARTA036347 | Dhrs2         | 0.0000551   | 0.360204804 | down |
| ASMM9PARTA030053 | Fcnb          | 0.044042222 | 0.409078298 | down |
| ASMM9PARTA039113 | BC021614      | 0.01366014  | 0.443285401 | down |
| ASMM9PARTA029700 | Usp17l5       | 0.033942975 | 0.311348041 | down |
| ASMM9PARTA022964 | Phldb3        | 0.002448608 | 0.462279239 | down |
| ASMM9PARTA029143 | Tjp1          | 0.027230859 | 0.378267546 | down |
| ASMM9PARTA022115 | Ankrd44       | 0.009138472 | 0.492206404 | down |
| ASMM9PARTA030909 | S100a5        | 0.0000843   | 0.011423776 | down |
| ASMM9PARTA023096 | Vmn2r5        | 0.008717687 | 0.480057453 | down |
| ASMM9PARTA033209 | Kcne4         | 0.00011     | 0.454853825 | down |
| ASMM9PARTA042746 | H2-M10.5      | 0.036926385 | 0.375847258 | down |
| ASMM9PARTA032569 | Il22          | 0.000457    | 0.351017538 | down |
| ASMM9PARTA031128 | Tal1          | 0.0000107   | 0.225453776 | down |
| ASMM9PARTA025388 | Prph          | 0.000134    | 0.435001944 | down |
| ASMM9PARTA021303 | Gm904         | 0.009609754 | 0.370477631 | down |
| ASMM9PARTA032496 | Ear7          | 0.001011707 | 0.297193451 | down |
| ASMM9PARTA021266 | Il20rb        | 0.000132    | 0.454482942 | down |
| ASMM9PARTA027690 | Ear2          | 0.0000152   | 0.341822378 | down |
| ASMM9PARTA038827 | Fgg           | 0.000798    | 0.49645038  | down |
| ASMM9PARTA037765 | Mesdc1        | 0.0000112   | 0.366369077 | down |
| ASMM9PARTA038122 | Fkbp6         | 0.0222166   | 0.478177074 | down |
| ASMM9PARTA043136 | Rassf4        | 0.04122614  | 0.484676234 | down |
| ASMM9PARTA036809 | 4930503E14Rik | 0.000062    | 0.315516804 | down |
| ASMM9PARTA036389 | Ppmlj         | 0.000206    | 0.349679486 | down |
| ASMM9PARTA027972 | Gzmk          | 0.0000815   | 0.291374553 | down |
| ASMM9PARTA030501 | Klk1b26       | 0.003923854 | 0.423787408 | down |
| ASMM9PARTA026905 | Beta-s        | 0.0000326   | 0.445792422 | down |
| ASMM9PARTA034826 | 1300014I06Rik | 0.0000687   | 0.04382009  | down |
| ASMM9PARTA038740 | Zfp192        | 0.013429289 | 0.419474823 | down |
| ASMM9PARTA024981 | Mup1          | 0.0000115   | 0.366565784 | down |
| ASMM9PARTA021726 | C030030A07Rik | 0.000001    | 0.16708227  | down |
| ASMM9PARTA038130 | Ear10         | 0.000524    | 0.341459687 | down |
| ASMM9PARTA044351 | Tanc1         | 0.004578317 | 0.480016344 | down |
| ASMM9PARTA032436 | Irx4          | 0.000000355 | 0.084356145 | down |
| ASMM9PARTA028279 | Irx3          | 0.000000254 | 0.082131382 | down |
| ASMM9PARTA038363 | Slc17a6       | 0.00000402  | 0.368558876 | down |
| ASMM9PARTA043669 | Retnlg        | 0.001435137 | 0.456194681 | down |
| ASMM9PARTA035887 | Cage1         | 0.001942557 | 0.232231482 | down |
| ASMM9PARTA031936 | Shox2         | 0.0000877   | 0.215286412 | down |
| ASMM9PARTA033853 | Pde6h         | 0.001855051 | 0.389529706 | down |
| ASMM9PARTA032344 | Agxt          | 0.006130318 | 0.497397344 | down |
| ASMM9PARTA043644 | Lhfpl1        | 0.014803316 | 0.465158814 | down |
| ASMM9PARTA029204 | Serpina1a     | 0.00000126  | 0.435796879 | down |
| ASMM9PARTA028237 | Hoxb6         | 0.000883    | 0.466255091 | down |
| ASMM9PARTA021102 | Slc38a6       | 0.0000172   | 0.38502895  | down |
| ASMM9PARTA039245 | Ccdc21        | 0.0000227   | 0.170697139 | down |
| ASMM9PARTA034600 | Camk2n1       | 0.00000129  | 0.210967349 | down |
| ASMM9PARTA038898 | Il33          | 0.0000193   | 0.312992435 | down |
| ASMM9PARTA039789 | Cyp2c70       | 0.009758089 | 0.395938871 | down |

|                  |          |             |             |      |
|------------------|----------|-------------|-------------|------|
| ASMM9PARTA028541 | Foxd2    | 0.0000134   | 0.422191108 | down |
| ASMM9PARTA042427 | Slc25a41 | 0.029000202 | 0.331379739 | down |
| ASMM9PARTA028427 | Klra2    | 0.000152    | 0.291645437 | down |
| ASMM9PARTA022135 | Cyt11    | 0.0000208   | 0.385958282 | down |
| ASMM9PARTA029321 | Wnt6     | 0.0000202   | 0.38973113  | down |
| ASMM9PARTA031372 | Cep110   | 0.003978495 | 0.499116489 | down |
| ASMM9PARTA033242 | Ucn      | 0.000032    | 0.25719136  | down |
| ASMM9PARTA029892 | H2-Q1    | 0.00000364  | 0.349764329 | down |
| ASMM9PARTA030248 | Hand2    | 0.008195564 | 0.473641563 | down |
| ASMM9PARTA021920 | Fam65c   | 0.004216134 | 0.467311207 | down |
| ASMM9PARTA030563 | Pax7     | 0.000357    | 0.163592866 | down |
| ASMM9PARTA044022 | Spink8   | 0.0000248   | 0.377640923 | down |
| ASMM9PARTA028217 | Lhx5     | 0.029400224 | 0.426123737 | down |
| ASMM9PARTA022057 | Ccdc90a  | 0.0000931   | 0.470118427 | down |
| ASMM9PARTA022848 | Gm10375  | 0.011573165 | 0.391472124 | down |
| ASMM9PARTA041875 | Lmln     | 0.023934191 | 0.466228809 | down |
| ASMM9PARTA029669 | Lefty1   | 0.0000246   | 0.296821252 | down |
| ASMM9PARTA030278 | Foxd3    | 7.76E-08    | 0.118712285 | down |
| ASMM9PARTA033719 | Apoc3    | 0.0000816   | 0.472522889 | down |
| ASMM9PARTA031523 | Rax      | 0.007013034 | 0.308461497 | down |
