# Supplementary material for: Microarray Profile of Long Noncoding RNA and Messenger RNA Expression in a Model of Alzheimer’s Disease
Source: MDPI journal article supplement (doi:10.3390/life10050064), 2020-05-14
Supplement: s1 [file s1]

# Supplementary

## Microarray Profile of Long Noncoding RNA and Messenger RNA Expression in a Model of Alzheimer's Disease

Linlin Wang <sup>†</sup>, Li Zeng <sup>†</sup>, Hailun Jiang, Zhuorong Li <sup>\*</sup> and Rui Liu <sup>\*</sup>

Institute of Medicinal Biotechnology, Chinese Academy of Medical Sciences and Peking Union Medical College, Beijing 100050, China; wanglinlin@wfmcc.edu.cn (L.W.); zengsheng@imb.pumc.edu.cn (L.Z.); jianghailun@imb.pumc.edu.cn (H.J.)

<sup>\*</sup> Correspondence: lizhuorong@imb.pumc.edu.cn (Z.L.); +86-10-8352017; .liurui@imb.pumc.edu.cn (R.L.); Tel.: +86-10-67087731

**Table S3.** Differently expressed lncRNAs in the brain of 6-month-old APP/PS1 mice compared with age-matched WT mice.

| Probe Name              | Gene Symbol       | <i>p</i> -Value | Fold Change | Regulation |
|-------------------------|-------------------|-----------------|-------------|------------|
| ASMM9PARTA045031        | Abhd1             | 0.000000243     | 3.1196003   | up         |
| ASMM9PARTA045031        | Abhd1             | 0.000000243     | 3.1196003   | up         |
| MM9LINCRNAEXON10451+_P1 | mouse lincRNA1286 | 0.003538504     | 2.2654934   | up         |
| MM9LINCRNAEXON10103-_P1 | mouse lincRNA1524 | 0.006277942     | 2.1662855   | up         |
| ASMM9PARTA045726        | 4933436C20Rik     | 0.000129        | 2.420025    | up         |
| ASMM9PARTA017102        | A230108P19Rik     | 0.021290345     | 2.4069388   | up         |
| MM9LINCRNAEXON11250-_P1 | mouse lincRNA0737 | 0.004286149     | 2.6884916   | up         |
| ASMM9PARTA010435        | Gm11019           | 0.025719354     | 2.0346353   | up         |
| human lincRNA1590+_P1   | human lincRNA1590 | 0.023626897     | 3.5407078   | up         |
| ASMM9PARTA017171        | 4732418A04Rik     | 0.000194        | 4.9253507   | up         |
| ASMM9PARTA046759        | AK039862          | 0.001835104     | 4.3281155   | up         |
| ASMM9PARTA018203        | NRON.1            | 0.0000172       | 3.3017004   | up         |
| ASMM9PARTA016545        | Gm16706           | 0.011395447     | 2.4015005   | up         |
| ASMM9PARTA016545        | Gm16706           | 0.011395447     | 2.4015005   | up         |
| ASMM9PARTA008337        |                   | 0.003564729     | 2.6720827   | up         |
| ASMM9PARTA005648        |                   | 0.016110636     | 2.1099603   | up         |
| ASMM9PARTA000497        |                   | 0.036847852     | 2.0237134   | up         |
| ASMM9PARTA010873        | Gm15382           | 0.001595537     | 2.52695     | up         |
| MM9LINCRNAEXON11181-_P1 | mouse lincRNA0672 | 0.025258476     | 2.2143273   | up         |
| ASMM9PARTA012176        | Gm15719           | 0.01595798      | 2.4363487   | up         |
| ASMM9PARTA004257        |                   | 0.001162169     | 2.5316021   | up         |
| mouse lincRNA0394-_P1   | mouse lincRNA0394 | 0.04695368      | 2.2102969   | up         |
| ASMM9PARTA015256        | 9130017K11Rik     | 0.001580209     | 3.02434     | up         |
| ASMM9PARTA015256        | 9130017K11Rik     | 0.001580209     | 3.02434     | up         |

|                         |                  |             |           |    |
|-------------------------|------------------|-------------|-----------|----|
| ASMM9PARTA050284        | Gak              | 0.009486467 | 2.5133553 | up |
| ASMM9PARTA046970        | BC006965         | 0.042283867 | 2.0452976 | up |
| CA559477_P1             | humanlincRNA2085 | 0.004959819 | 2.3531377 | up |
| ASMM9PARTA045330        | Gm11149          | 0.000195    | 2.4911754 | up |
| ASMM9PARTA045330        | Gm11149          | 0.000195    | 2.4911754 | up |
| ASMM9PARTA045330        | Gm11149          | 0.000195    | 2.4911754 | up |
| CA465684_P1             | mouselincRNA0967 | 0.015294251 | 2.8427927 | up |
| ASMM9PARTA046506        | mKIAA4192        | 0.001182393 | 2.629909  | up |
| ASMM9PARTA014585        | Gm8093           | 0.008273289 | 2.3559117 | up |
| ASMM9PARTA005223        |                  | 0.008885149 | 2.1005719 | up |
| ASMM9PARTA047932        | AK135804         | 0.006776804 | 2.0336554 | up |
| ASMM9PARTA012883        | Gm12706          | 0.000925    | 2.0907204 | up |
| ASMM9PARTA003398        |                  | 0.001732132 | 2.971151  | up |
| ASMM9PARTA007669        |                  | 0.024372283 | 2.0133264 | up |
| ASMM9PARTA008318        |                  | 0.00395549  | 2.3784897 | up |
| ASMM9PARTA049385        | AK137033         | 0.002817194 | 2.1945105 | up |
| CUST_282_P1426073487    | uc.284           | 0.003614473 | 4.0671477 | up |
| ASMM9PARTA013061        | Gm13913          | 0.002891015 | 4.452653  | up |
| ASMM9PARTA049079        | AK047177         | 0.026932668 | 3.2706022 | up |
| ASMM9PARTA017430        | A830052D11Rik    | 0.000927    | 2.1083608 | up |
| ASMM9PARTA017430        | A830052D11Rik    | 0.000927    | 2.1083608 | up |
| humanlincRNA1365-_P1    | humanlincRNA1365 | 0.049885552 | 2.178999  | up |
| ASMM9PARTA016815        | Gm16534          | 0.011682607 | 2.007548  | up |
| ASMM9PARTA017337        | 1700021L23Rik    | 0.005163256 | 2.999624  | up |
| ASMM9PARTA007917        |                  | 0.00391314  | 3.420385  | up |
| ASMM9PARTA000849        |                  | 0.017323356 | 3.2378094 | up |
| CUST_714_P1426073487    | uc.235           | 0.002783289 | 3.806529  | up |
| ASMM9PARTA045466        | F930015N05Rik    | 0.000606    | 2.0401404 | up |
| MM9LINCRNAEXON11111-_P1 | mouselincRNA0828 | 0.0000201   | 2.4992845 | up |
| ASMM9PARTA005451        |                  | 0.003567096 | 2.315891  | up |
| ASMM9PARTA000911        |                  | 0.006294135 | 2.3552628 | up |
| ASMM9PARTA017280        | Gm13976          | 0.01812167  | 3.2009199 | up |
| ASMM9PARTA011323        | Gm12677          | 0.003474014 | 2.3821118 | up |
| ASMM9PARTA014414        | 5430427M07Rik    | 0.039535355 | 3.2116146 | up |
| ASMM9PARTA018542        | AC164629.8       | 0.001232109 | 3.675345  | up |
| humanlincRNA2028-_P1    | humanlincRNA2028 | 0.03381314  | 2.6891527 | up |
| ASMM9PARTA049439        | mKIAA1125        | 0.019081455 | 2.6283262 | up |
| ASMM9PARTA006577        |                  | 0.000000996 | 2.6155295 | up |
| ASMM9PARTA003621        |                  | 0.030045127 | 2.2775762 | up |
| BG082317_P1             | mouselincRNA0895 | 0.030177962 | 2.0221033 | up |
| ASMM9PARTA007950        |                  | 0.027898293 | 2.5250096 | up |
| ASMM9PARTA003250        |                  | 0.014591098 | 2.076166  | up |
| ASMM9PARTA003250        |                  | 0.014591098 | 2.076166  | up |
| ASMM9PARTA015353        | Gm1720           | 0.009685411 | 2.0152292 | up |
| ASMM9PARTA048047        | Pigz             | 0.000126    | 3.1346016 | up |
| ASMM9PARTA011710        | Gm13689          | 0.014496394 | 2.728053  | up |
| ASMM9PARTA050830        | AK081140         | 0.00000329  | 2.5226064 | up |
| ASMM9PARTA050830        | AK081140         | 0.00000329  | 2.5226064 | up |
| ASMM9PARTA050830        | AK081140         | 0.00000329  | 2.5226064 | up |

|                           |                  |             |           |    |
|---------------------------|------------------|-------------|-----------|----|
| humanlincRNA1576- _P1     | humanlincRNA1576 | 0.000791    | 2.148372  | up |
| ASMM9PARTA001768          |                  | 0.037898626 | 2.1554246 | up |
| humanlincRNA1422+ _P1     | humanlincRNA1422 | 0.003613522 | 3.3776646 | up |
| MM9LINC RNAEXON10275- _P1 | mouselincRNA1493 | 0.012053111 | 2.185643  | up |
| ASMM9PARTA010627          | Gm15626          | 0.014767407 | 2.0154865 | up |
| ASMM9PARTA049386          | AK158189         | 0.04751108  | 2.8660064 | up |
| ASMM9PARTA047940          | AK014435         | 0.000127    | 7.87863   | up |
| CUST_84_PI426409190       | Gm16404          | 0.0000736   | 3.7620046 | up |
| ASMM9PARTA008118          |                  | 0.030992094 | 2.8354397 | up |
| ASMM9PARTA011622          | Gm12377          | 0.015353539 | 2.2520926 | up |
| ASMM9PARTA005824          |                  | 0.004013028 | 3.8872156 | up |
| ASMM9PARTA008763          |                  | 0.002697579 | 3.2295306 | up |
| ASMM9PARTA006453          |                  | 0.003511864 | 2.7597766 | up |
| ASMM9PARTA015236          | Gm14161          | 0.028390415 | 2.4637067 | up |
| MM9LINC RNAEXON10551- _P1 | mouselincRNA1185 | 0.007204602 | 2.217983  | up |
| ASMM9PARTA010558          | Xlr5d-ps         | 0.024622032 | 3.307442  | up |
| ASMM9PARTA010441          | Gm15560          | 0.000172    | 2.100406  | up |
| ASMM9PARTA045751          | Gm833            | 0.001627522 | 2.0532517 | up |
| ASMM9PARTA015224          | BC065397         | 0.000651    | 4.5189176 | up |
| ASMM9PARTA015224          | BC065397         | 0.000651    | 4.5189176 | up |
| ASMM9PARTA015224          | BC065397         | 0.000651    | 4.5189176 | up |
| ASMM9PARTA015224          | BC065397         | 0.000651    | 4.5189176 | up |
| ASMM9PARTA015224          | BC065397         | 0.000651    | 4.5189176 | up |
| ASMM9PARTA015224          | BC065397         | 0.000651    | 4.5189176 | up |
| ASMM9PARTA015224          | BC065397         | 0.000651    | 4.5189176 | up |
| ASMM9PARTA015224          | BC065397         | 0.000651    | 4.5189176 | up |
| AI507909 _P1              | humanlincRNA1257 | 0.003566771 | 2.365197  | up |
| ASMM9PARTA046107          | AK039957         | 0.035611473 | 2.0791461 | up |
| ASMM9PARTA010032          | Gm5301           | 0.029425412 | 2.8055193 | up |
| ASMM9PARTA018293          | Gm16537          | 0.000716    | 2.1571558 | up |
| ASMM9PARTA008417          |                  | 0.014867369 | 2.1852226 | up |
| ASMM9PARTA011704          | Gm13888          | 0.009480914 | 2.3480234 | up |
| ASMM9PARTA011738          | Gm15470          | 0.000384    | 2.2918737 | up |
| ASMM9PARTA006207          |                  | 0.027935762 | 2.6583912 | up |
| ASMM9PARTA048537          | NR_002853        | 0.0000136   | 5.046747  | up |
| ASMM9PARTA000492          |                  | 0.000442    | 3.1650398 | up |
| ASMM9PARTA050019          | AK148461         | 0.007182398 | 2.8180325 | up |
| ASMM9PARTA005495          |                  | 0.002728953 | 2.8448937 | up |
| ASMM9PARTA007865          |                  | 0.001723707 | 3.2370198 | up |
| ASMM9PARTA007417          |                  | 0.006146743 | 4.9098845 | up |
| ASMM9PARTA013734          | Gm13131          | 0.0000777   | 2.2333233 | up |
| ASMM9PARTA013190          | Gm7386           | 0.002716446 | 2.9815123 | up |
| CUST_132_PI426409190      | 7SK.216          | 0.0000836   | 2.469293  | up |
| MM9LINC RNAEXON10332- _P1 |                  | 0.03909866  | 2.6996117 | up |
| ASMM9PARTA013040          | Gm13577          | 0.000453    | 2.3502493 | up |
| ASMM9PARTA019232          | Gm14957          | 0.0000198   | 2.017383  | up |
| MM9LINC RNAEXON10455- _P1 | mouselincRNA1287 | 0.024758393 | 2.0509887 | up |
| CUST_184_PI426409190      |                  | 0.021882309 | 2.307146  | up |
| BI557075 _P1              | mouselincRNA0751 | 0.020051941 | 2.1689298 | up |

|                         |                  |             |           |    |
|-------------------------|------------------|-------------|-----------|----|
| ASMM9PARTA010114        | Gm11041          | 1.65E-08    | 4.5114403 | up |
| humanlincRNA1416-_P1    | humanlincRNA1416 | 0.005521476 | 2.1290872 | up |
| ASMM9PARTA001249        |                  | 0.001627436 | 3.3796606 | up |
| ASMM9PARTA011188        | Hmgbl-ps4        | 0.000216    | 2.3263745 | up |
| BB869594_P1             | mouselincRNA1003 | 0.024265677 | 3.3511324 | up |
| ASMM9PARTA046284        | AK036470         | 0.0444964   | 4.350874  | up |
| ASMM9PARTA017913        | Gm12440          | 0.000271    | 2.851259  | up |
| MM9LINCRNAEXON11222+_P1 | mouselincRNA0710 | 0.009465001 | 2.1307418 | up |
| ASMM9PARTA007699        |                  | 0.006026872 | 2.786616  | up |
| ASMM9PARTA011747        | Gm8809           | 0.0034172   | 2.5957918 | up |
| BI180507_P1             | mouselincRNA1445 | 0.04222658  | 3.1212835 | up |
| CX210663_P1             | humanlincRNA1977 | 0.045880754 | 2.0853064 | up |
| ASMM9PARTA002112        |                  | 0.001073549 | 2.2244182 | up |
| ASMM9PARTA013980        | 2810403D21Rik    | 0.0170817   | 2.5690312 | up |
| ASMM9PARTA048349        | AK018679         | 0.000471    | 3.159507  | up |
| ASMM9PARTA047160        | Slc38a6          | 0.000477    | 2.5141454 | up |
| ASMM9PARTA047160        | Slc38a6          | 0.000477    | 2.5141454 | up |
| ASMM9PARTA015335        | B230314M03Rik    | 0.02093286  | 3.4851682 | up |
| ASMM9PARTA017631        | Gm5755           | 0.024254544 | 2.2938702 | up |
| MM9LINCRNAEXON11010-_P1 | mouselincRNA0889 | 0.03270752  | 4.374618  | up |
| humanlincRNA0409-_P1    | humanlincRNA0409 | 0.04526558  | 2.114595  | up |
| ASMM9PARTA014856        | 1810059H22Rik    | 0.024508571 | 2.0675554 | up |
| ASMM9PARTA015039        | Gm15462          | 0.008491262 | 2.2994695 | up |
| ASMM9PARTA018383        | Gm16551          | 0.0000014   | 3.6906974 | up |
| ASMM9PARTA018240        | 7SK.318          | 0.009609278 | 4.277669  | up |
| ASMM9PARTA047628        | AK143833         | 0.00163815  | 2.0070548 | up |
| MM9LINCRNAEXON10775+_P1 | mouselincRNA1143 | 0.000213    | 2.9503467 | up |
| ASMM9PARTA050633        | AK006412         | 0.019480785 | 2.2714992 | up |
| ASMM9PARTA046039        | LOC100415784     | 0.02861781  | 2.5691552 | up |
| ASMM9PARTA001180        |                  | 0.04690896  | 2.4605153 | up |
| ASMM9PARTA008433        |                  | 0.005605161 | 3.513392  | up |
| ASMM9PARTA003776        |                  | 0.001823768 | 2.083925  | up |
| ASMM9PARTA009988        | 4930473A02Rik    | 0.007433488 | 2.2167606 | up |
| ASMM9PARTA009988        | 4930473A02Rik    | 0.007433488 | 2.2167606 | up |
| ASMM9PARTA009988        | 4930473A02Rik    | 0.007433488 | 2.2167606 | up |
| CA749839_P1             | humanlincRNA1455 | 0.036991995 | 3.0595503 | up |
| ASMM9PARTA005626        |                  | 0.02361701  | 3.3478467 | up |
| ASMM9PARTA013524        | Gm16407          | 0.012301705 | 2.224433  | up |
| ASMM9PARTA005747        |                  | 0.000308    | 2.266706  | up |
| ASMM9PARTA019355        | RP23-141L18.6    | 0.006608017 | 2.0787408 | up |
| ASMM9PARTA048530        | mKIAA0136        | 0.009078536 | 2.3973286 | up |
| MM9LINCRNAEXON10991+_P1 |                  | 0.008344797 | 2.318909  | up |
| ASMM9PARTA002929        |                  | 0.04909547  | 2.9300334 | up |
| ASMM9PARTA046040        | 4931406H21Rik    | 0.004570165 | 2.43949   | up |
| ASMM9PARTA001979        |                  | 0.001217148 | 2.6140153 | up |
| ASMM9PARTA005628        |                  | 0.001928635 | 2.7167344 | up |
| ASMM9PARTA019050        | RP24-252L3.2     | 0.00021     | 2.3131325 | up |
| ASMM9PARTA015438        | B430212C06Rik    | 0.037105132 | 2.1464314 | up |
| ASMM9PARTA005761        |                  | 0.000184    | 2.7226276 | up |

|                         |                  |             |           |    |
|-------------------------|------------------|-------------|-----------|----|
| ASMM9PARTA019063        | AC125279.2       | 0.003924265 | 2.026877  | up |
| mouselincRNA0953+_P1    | mouselincRNA0953 | 0.017413868 | 2.180299  | up |
| ASMM9PARTA011894        | Gm14593          | 0.000797    | 2.0784206 | up |
| MM9LINCRNAEXON11384+_P1 | mouselincRNA0595 | 0.023294466 | 2.2980533 | up |
| ASMM9PARTA017049        | Gm2694           | 0.000232    | 9.320407  | up |
| ASMM9PARTA016462        | Gm14635          | 0.038758814 | 2.3224788 | up |
| CUST_909_PI426073487    | uc.430           | 0.00012     | 8.662708  | up |
| CUST_909_PI426073487    | uc.430           | 0.00012     | 8.662708  | up |
| CUST_909_PI426073487    | uc.430           | 0.00012     | 8.662708  | up |
| CUST_909_PI426073487    | uc.430           | 0.00012     | 8.662708  | up |
| CUST_909_PI426073487    | uc.430           | 0.00012     | 8.662708  | up |
| ASMM9PARTA019483        | AC153382.1       | 0.03434507  | 4.1659966 | up |
| MM9LINCRNAEXON11361-_P1 | mouselincRNA0586 | 0.023001742 | 2.4966457 | up |
| ASMM9PARTA005615        |                  | 0.01960919  | 2.7944953 | up |
| MM9LINCRNAEXON10538-_P1 | mouselincRNA1178 | 0.033266254 | 2.4831288 | up |
| MM9LINCRNAEXON11092+_P1 | mouselincRNA0819 | 0.036621634 | 2.003259  | up |
| ASMM9PARTA048151        | AK085876         | 0.047738314 | 3.8536763 | up |
| ASMM9PARTA048151        | AK085876         | 0.047738314 | 3.8536763 | up |
| ASMM9PARTA048151        | AK085876         | 0.047738314 | 3.8536763 | up |
| ASMM9PARTA006865        |                  | 0.000446    | 4.9645433 | up |
| ASMM9PARTA048808        | AK081497         | 0.00000402  | 2.214474  | up |
| ASMM9PARTA004660        |                  | 0.005279298 | 2.5740352 | up |
| ASMM9PARTA047373        | AK141540         | 0.049087267 | 2.6281195 | up |
| ASMM9PARTA045220        | Tmem181c-ps      | 0.026408298 | 2.090798  | up |
| ASMM9PARTA005238        |                  | 0.002142166 | 2.8474588 | up |
| ASMM9PARTA010309        | Gm3371           | 0.000688    | 2.8403668 | up |
| ASMM9PARTA004795        |                  | 0.013844482 | 2.466936  | up |
| ASMM9PARTA015594        | D430001F17Rik    | 0.003473096 | 2.2148507 | up |
| ASMM9PARTA006197        |                  | 0.03481218  | 3.0301728 | up |
| ASMM9PARTA001200        |                  | 0.037559688 | 2.3540723 | up |
| ASMM9PARTA003874        |                  | 0.0000143   | 2.6614656 | up |
| ASMM9PARTA044891        | 1700108J01Rik    | 0.012962443 | 2.6089635 | up |
| ASMM9PARTA046659        | 4933439F18Rik    | 0.00000331  | 2.7995448 | up |
| ASMM9PARTA046659        | 4933439F18Rik    | 0.00000331  | 2.7995448 | up |
| MM9LINCRNAEXON11316+_P1 | mouselincRNA0662 | 0.0158313   | 3.1894422 | up |
| humanlincRNA1824+_P1    | humanlincRNA1824 | 0.043534677 | 3.7175477 | up |
| mouselincRNA0757+_P1    | mouselincRNA0757 | 0.04705886  | 4.155268  | up |
| ASMM9PARTA051750        | Smpx             | 0.000694    | 11.515533 | up |
| humanlincRNA2404-_P1    | humanlincRNA2404 | 0.016887693 | 2.9459364 | up |
| ASMM9PARTA049669        | AK053689         | 0.00000821  | 2.3798423 | up |
| ASMM9PARTA049669        | AK053689         | 0.00000821  | 2.3798423 | up |
| ASMM9PARTA049669        | AK053689         | 0.00000821  | 2.3798423 | up |
| ASMM9PARTA049669        | AK053689         | 0.00000821  | 2.3798423 | up |
| ASMM9PARTA049669        | AK053689         | 0.00000821  | 2.3798423 | up |
| ASMM9PARTA049669        | AK053689         | 0.00000821  | 2.3798423 | up |
| CUST_141_PI426073487    | uc.143           | 0.020154553 | 2.8944547 | up |
| CUST_141_PI426073487    | uc.143           | 0.020154553 | 2.8944547 | up |
| CUST_141_PI426073487    | uc.143           | 0.020154553 | 2.8944547 | up |
| CUST_141_PI426073487    | uc.143           | 0.020154553 | 2.8944547 | up |

|                         |                  |             |           |    |
|-------------------------|------------------|-------------|-----------|----|
| CUST_141_PI426073487    | uc.143           | 0.020154553 | 2.8944547 | up |
| humanlincRNA0170-_P1    | humanlincRNA0170 | 0.001058076 | 3.5001497 | up |
| CUST_707_PI426073487    | uc.228           | 0.037611984 | 2.0780194 | up |
| ASMM9PARTA004940        |                  | 0.0000236   | 4.5353403 | up |
| ASMM9PARTA001304        |                  | 0.023967667 | 3.30965   | up |
| ASMM9PARTA004865        |                  | 0.044790927 | 2.4650948 | up |
| ASMM9PARTA006224        |                  | 0.002246094 | 2.7445166 | up |
| ASMM9PARTA006230        |                  | 0.019308556 | 2.3876908 | up |
| ASMM9PARTA002107        |                  | 0.003759661 | 2.4878573 | up |
| ASMM9PARTA004069        |                  | 0.00000168  | 2.2173553 | up |
| ASMM9PARTA013403        | Gm13108          | 0.001053804 | 3.019906  | up |
| ASMM9PARTA004112        |                  | 0.000111    | 2.1247754 | up |
| CUST_820_PI426073487    | uc.341           | 0.034044523 | 2.0059185 | up |
| ASMM9PARTA003242        |                  | 0.000814    | 3.5117667 | up |
| ASMM9PARTA006070        |                  | 0.0391647   | 2.7844713 | up |
| ASMM9PARTA018880        | RP24-494O2.2     | 0.00451887  | 2.3739965 | up |
| ASMM9PARTA003546        |                  | 0.012069855 | 2.6409264 | up |
| ASMM9PARTA017501        | Gm15179          | 0.040958084 | 7.105899  | up |
| ASMM9PARTA049106        | AK048878         | 0.030526496 | 2.5606627 | up |
| ASMM9PARTA005085        |                  | 0.002507699 | 2.7155657 | up |
| ASMM9PARTA004587        |                  | 0.02057685  | 3.3519788 | up |
| ASMM9PARTA004417        |                  | 0.034157258 | 2.1888185 | up |
| ASMM9PARTA001525        |                  | 0.024316404 | 2.3973048 | up |
| ASMM9PARTA014282        | Gm15991          | 0.007740527 | 2.3824847 | up |
| ASMM9PARTA015617        | Gm15133          | 0.04867951  | 2.364248  | up |
| ASMM9PARTA049885        | ADAM22           | 0.032752007 | 4.200696  | up |
| ASMM9PARTA049885        | ADAM22           | 0.032752007 | 4.200696  | up |
| ASMM9PARTA049885        | ADAM22           | 0.032752007 | 4.200696  | up |
| ASMM9PARTA008175        |                  | 0.040986877 | 2.2441556 | up |
| ASMM9PARTA001618        |                  | 0.001134463 | 2.6449451 | up |
| ASMM9PARTA046608        | Mif1             | 0.0000083   | 2.9739807 | up |
| BG085481_P1             | mouselincRNA1465 | 0.009626612 | 2.0220177 | up |
| ASMM9PARTA014753        | Gm12603          | 0.000979    | 3.1681597 | up |
| ASMM9PARTA005164        |                  | 0.000171    | 2.4501905 | up |
| MM9LINCRNAEXON10071-_P1 | mouselincRNA1506 | 0.015053556 | 3.0902917 | up |
| ASMM9PARTA005034        |                  | 0.002631368 | 2.4690459 | up |
| humanlincRNA1862+_P1    | humanlincRNA1862 | 0.0310584   | 3.0636132 | up |
| mouselincRNA0617-_P1    | mouselincRNA0617 | 0.006884662 | 2.308748  | up |
| MM9LINCRNAEXON11571+_P1 | mouselincRNA0391 | 0.003432522 | 4.0042496 | up |
| ASMM9PARTA003751        |                  | 0.00000084  | 12.310973 | up |
| ASMM9PARTA011562        | Gm15039          | 0.000211    | 2.456428  | up |
| MM9LINCRNAEXON10841-_P1 | mouselincRNA0984 | 0.027590638 | 2.7379727 | up |
| ASMM9PARTA003610        |                  | 0.042254943 | 3.072782  | up |
| ASMM9PARTA016939        | Gm12063          | 0.028061293 | 2.6095011 | up |
| mouselincRNA0327+_P1    | mouselincRNA0327 | 0.002864747 | 4.3478937 | up |
| MM9LINCRNAEXON10848+_P1 | mouselincRNA0988 | 0.027104352 | 3.9283922 | up |
| humanlincRNA1007-_P1    | humanlincRNA1007 | 0.005941539 | 2.9665976 | up |
| CUST_124_PI426409190    | AC142215.1       | 0.021953136 | 2.875312  | up |
| ASMM9PARTA049290        | AK139560         | 0.029100709 | 2.248473  | up |

|                         |                  |             |           |    |
|-------------------------|------------------|-------------|-----------|----|
| ASMM9PARTA019265        | RP23-48M16.7     | 0.002356861 | 2.485483  | up |
| MM9LINCRNAEXON11079+_P1 | mouselincRNA0819 | 0.0000116   | 2.0746212 | up |
| ASMM9PARTA004293        |                  | 0.000486    | 2.1103024 | up |
| ASMM9PARTA018549        | 1810009N23Rik    | 0.02632637  | 2.1044378 | up |
| ASMM9PARTA018549        | 1810009N23Rik    | 0.02632637  | 2.1044378 | up |
| ASMM9PARTA018549        | 1810009N23Rik    | 0.02632637  | 2.1044378 | up |
| ASMM9PARTA016660        | Gm15342          | 0.006230607 | 2.530776  | up |
| ASMM9PARTA016660        | Gm15342          | 0.006230607 | 2.530776  | up |
| ASMM9PARTA008119        |                  | 0.008739894 | 3.5971806 | up |
| ASMM9PARTA008119        |                  | 0.008739894 | 3.5971806 | up |
| ASMM9PARTA008119        |                  | 0.008739894 | 3.5971806 | up |
| ASMM9PARTA008441        |                  | 0.008680396 | 2.9530218 | up |
| ASMM9PARTA008441        |                  | 0.008680396 | 2.9530218 | up |
| ASMM9PARTA045636        | Ngrn             | 0.0000224   | 2.6480951 | up |
| ASMM9PARTA005106        |                  | 0.030218247 | 3.7436645 | up |
| ASMM9PARTA005106        |                  | 0.030218247 | 3.7436645 | up |
| MM9LINCRNAEXON11076-_P1 |                  | 0.000243    | 3.0707293 | up |
| ASMM9PARTA001210        |                  | 0.006707199 | 2.4725158 | up |
| ASMM9PARTA001210        |                  | 0.006707199 | 2.4725158 | up |
| ASMM9PARTA008966        |                  | 0.017784009 | 2.3902009 | up |
| humanlincRNA1751+_P1    | humanlincRNA1751 | 0.005374423 | 11.642016 | up |
| MM9LINCRNAEXON11077-_P1 |                  | 0.007299297 | 2.1697588 | up |
| ASMM9PARTA009943        | Gm8062           | 0.006803574 | 2.5826466 | up |
| ASMM9PARTA008187        |                  | 0.03344953  | 2.8776648 | up |
| ASMM9PARTA017775        | 1700080N15Rik    | 0.049553793 | 2.2832606 | up |
| ASMM9PARTA018736        | Gm15509          | 0.016165158 | 2.2104762 | up |
| ASMM9PARTA047903        | AK039376         | 0.000748    | 5.429104  | up |
| MM9LINCRNAEXON12070+_P1 | mouselincRNA0095 | 0.029400904 | 3.0402145 | up |
| ASMM9PARTA049600        | AK080367         | 0.003822616 | 2.8285954 | up |
| ASMM9PARTA006133        |                  | 0.024575898 | 4.3784523 | up |
| ASMM9PARTA007358        |                  | 0.0000158   | 3.1322258 | up |
| ASMM9PARTA009806        | Kat2b-ps         | 0.000168    | 2.9269757 | up |
| ASMM9PARTA046612        | mKIAA0946        | 0.002403481 | 2.253309  | up |
| ASMM9PARTA007218        |                  | 0.004203985 | 2.2174945 | up |
| ASMM9PARTA005923        |                  | 0.046916507 | 2.3488636 | up |
| mouselincRNA0632-_P1    | mouselincRNA0632 | 0.047904536 | 2.291838  | up |
| ASMM9PARTA005487        |                  | 0.015877029 | 2.7783203 | up |
| BU700229_P1             | humanlincRNA0480 | 0.007076173 | 3.0498855 | up |
| AA612090_P1             | humanlincRNA2042 | 0.014061171 | 2.833393  | up |
| MM9LINCRNAEXON10912+_P1 |                  | 0.04281604  | 2.326849  | up |
| ASMM9PARTA006952        |                  | 0.000212    | 2.933043  | up |
| ASMM9PARTA015366        | Gm13941          | 0.004194527 | 2.2182326 | up |
| ASMM9PARTA048905        | AK039403         | 0.00581306  | 2.630781  | up |
| ASMM9PARTA016699        | Gm11274          | 0.000149    | 2.0988553 | up |
| ASMM9PARTA002798        |                  | 0.016208883 | 3.5863788 | up |
| ASMM9PARTA004219        |                  | 0.029434249 | 2.437581  | up |
| ASMM9PARTA045026        | Nctc1            | 0.048704736 | 8.675903  | up |
| ASMM9PARTA004020        |                  | 0.002604622 | 2.8132827 | up |
| ASMM9PARTA003330        |                  | 0.000059    | 2.087925  | up |

|                         |                  |             |           |    |
|-------------------------|------------------|-------------|-----------|----|
| ASMM9PARTA017311        | Gm15767          | 0.01592545  | 2.0210102 | up |
| ASMM9PARTA048789        | AK196959         | 0.006345866 | 3.056914  | up |
| ASMM9PARTA046723        | AK087691         | 0.04555099  | 2.386392  | up |
| ASMM9PARTA008215        |                  | 0.027094787 | 2.175607  | up |
| MM9LINCRNAEXON12111-_P1 | mouselincRNA0122 | 0.001980354 | 2.632564  | up |
| ASMM9PARTA019467        | RP24-318H2.3     | 0.021552607 | 5.180711  | up |
| MM9LINCRNAEXON10237-_P1 | mouselincRNA1492 | 0.005712733 | 2.2694352 | up |
| MM9LINCRNAEXON11232+_P1 | mouselincRNA0719 | 0.000351    | 3.2957702 | up |
| ASMM9PARTA008541        |                  | 0.010017832 | 2.381682  | up |
| ASMM9PARTA004196        |                  | 0.026486952 | 3.3065698 | up |
| ASMM9PARTA010185        | Gm12568          | 0.0000167   | 2.1588042 | up |
| ASMM9PARTA011470        | Gm13106          | 0.006857961 | 2.5908992 | up |
| ASMM9PARTA045533        | Gm11213          | 0.000566    | 2.0588064 | up |
| ASMM9PARTA008501        |                  | 0.008320432 | 3.2261076 | up |
| CUST_596_PI426073487    | uc.117           | 0.039768543 | 2.2010832 | up |
| ASMM9PARTA046838        | AK138505         | 0.003567821 | 2.2114522 | up |
| ASMM9PARTA046838        | AK138505         | 0.003567821 | 2.2114522 | up |
| ASMM9PARTA046838        | AK138505         | 0.003567821 | 2.2114522 | up |
| CUST_407_PI426073487    | uc.409           | 0.001603269 | 2.305996  | up |
| humanlincRNA0518+_P1    | humanlincRNA0518 | 0.002420107 | 9.017064  | up |
| ASMM9PARTA010683        | Gm14981          | 0.029760793 | 2.2073135 | up |
| humanlincRNA1546-_P1    | humanlincRNA1546 | 0.0000944   | 2.0835197 | up |
| ASMM9PARTA002361        |                  | 0.0000749   | 2.348999  | up |
| AK145365_P1             | mouselincRNA1288 | 0.004732965 | 2.7883756 | up |
| ASMM9PARTA018655        | Gm10075          | 0.0000383   | 2.2078483 | up |
| MM9LINCRNAEXON11321+_P1 | mouselincRNA0524 | 0.003361886 | 2.7437582 | up |
| ASMM9PARTA050637        | smarp            | 0.001898545 | 3.6767123 | up |
| BU962743_P1             | mouselincRNA1083 | 0.023437398 | 4.246538  | up |
| ASMM9PARTA017459        | Hoxb3os          | 0.0000226   | 3.595772  | up |
| ASMM9PARTA017459        | Hoxb3os          | 0.0000226   | 3.595772  | up |
| ASMM9PARTA017459        | Hoxb3os          | 0.0000226   | 3.595772  | up |
| ASMM9PARTA002719        |                  | 0.000633    | 3.0601602 | up |
| ASMM9PARTA005665        |                  | 0.033535264 | 2.1038098 | up |
| BY207821_P1             | mouselincRNA0550 | 0.04907656  | 2.0571024 | up |
| ASMM9PARTA006951        |                  | 0.000108    | 2.0818617 | up |
| ASMM9PARTA014684        | 2310050B05Rik    | 0.048039746 | 3.769259  | up |
| ASMM9PARTA014684        | 2310050B05Rik    | 0.048039746 | 3.769259  | up |
| ASMM9PARTA000801        |                  | 0.006958491 | 3.5187576 | up |
| ASMM9PARTA007224        |                  | 0.006875541 | 3.3408072 | up |
| ASMM9PARTA013503        | Gm14804          | 0.03480002  | 2.4201102 | up |
| ASMM9PARTA002839        |                  | 0.003558714 | 2.2040365 | up |
| ASMM9PARTA048120        | AK017296         | 0.003308056 | 2.1203625 | up |
| ASMM9PARTA048120        | AK017296         | 0.003308056 | 2.1203625 | up |
| ASMM9PARTA045178        | Sycp1-ps1        | 1.14E-08    | 40.444847 | up |
| ASMM9PARTA045616        | Serpina3h        | 0.000526    | 2.661606  | up |
| BX636194_P1             | mouselincRNA1032 | 0.0000755   | 3.3333285 | up |
| ASMM9PARTA005646        |                  | 0.000167    | 2.908214  | up |
| ASMM9PARTA005646        |                  | 0.000167    | 2.908214  | up |
| CUST_49_PI426409190     | AK076905         | 0.03077829  | 3.6216407 | up |



|                         |                  |             |           |    |
|-------------------------|------------------|-------------|-----------|----|
| mouselincRNA0735-_P1    | mouselincRNA0735 | 0.026726022 | 2.2493627 | up |
| ASMM9PARTA048388        | C21orf66         | 0.003340053 | 2.0076077 | up |
| ASMM9PARTA007593        |                  | 0.004044956 | 2.2138622 | up |
| ASMM9PARTA046706        | AK082467         | 0.0000126   | 5.086711  | up |
| ASMM9PARTA045201        | Gm10565          | 0.049089514 | 2.3213904 | up |
| ASMM9PARTA050227        | BC028660         | 0.024512043 | 2.682108  | up |
| ASMM9PARTA006971        |                  | 0.000262    | 2.3942513 | up |
| MM9LINCRNAEXON12056-_P1 | mouselincRNA0073 | 6.97E-08    | 4.2592525 | up |
| ASMM9PARTA017493        | Gm15692          | 0.0000751   | 2.005298  | up |
| ASMM9PARTA017493        | Gm15692          | 0.0000751   | 2.005298  | up |
| ASMM9PARTA007175        |                  | 0.002617595 | 2.0595605 | up |
| ASMM9PARTA046627        | BC023483         | 0.00000625  | 2.1630623 | up |
| ASMM9PARTA015968        | Gm11521          | 0.002147284 | 2.4110267 | up |
| humanlincRNA1010-_P1    | humanlincRNA1010 | 0.009802205 | 2.9109712 | up |
| BI108441_P1             | mouselincRNA0637 | 0.03589324  | 2.610662  | up |
| BI108441_P1             | mouselincRNA0637 | 0.03589324  | 2.610662  | up |
| BI108441_P1             | mouselincRNA0637 | 0.03589324  | 2.610662  | up |
| BI108441_P1             | mouselincRNA0637 | 0.03589324  | 2.610662  | up |
| BI108441_P1             | mouselincRNA0637 | 0.03589324  | 2.610662  | up |
| BI108441_P1             | mouselincRNA0637 | 0.03589324  | 2.610662  | up |
| BI108441_P1             | mouselincRNA0637 | 0.03589324  | 2.610662  | up |
| BI108441_P1             | mouselincRNA0637 | 0.03589324  | 2.610662  | up |
| BI108441_P1             | mouselincRNA0637 | 0.03589324  | 2.610662  | up |
| ASMM9PARTA007614        |                  | 0.022839185 | 2.4202943 | up |
| ASMM9PARTA003563        |                  | 0.003147569 | 2.532423  | up |
| ASMM9PARTA002895        |                  | 0.000319    | 2.6496823 | up |
| ASMM9PARTA018150        | Gm16551          | 0.000292    | 3.2764378 | up |
| ASMM9PARTA000137        |                  | 0.000431    | 2.885484  | up |
| ASMM9PARTA046058        | PAPK-A           | 0.000000423 | 2.0264783 | up |
| ASMM9PARTA046058        | PAPK-A           | 0.000000423 | 2.0264783 | up |
| MM9LINCRNAEXON11978+_P1 | mouselincRNA0222 | 0.001084389 | 2.481123  | up |
| MM9LINCRNAEXON11855-_P1 |                  | 0.004649991 | 2.7688546 | up |
| MM9LINCRNAEXON11855-_P1 |                  | 0.004649991 | 2.7688546 | up |
| MM9LINCRNAEXON11855-_P1 |                  | 0.004649991 | 2.7688546 | up |
| ASMM9PARTA017917        | Gm16143          | 0.007148983 | 3.7095916 | up |
| MM9LINCRNAEXON10903-_P1 |                  | 0.000983    | 3.012943  | up |
| ASMM9PARTA013657        | Gm9225           | 0.003845907 | 3.109786  | up |
| ASMM9PARTA012091        | Gm12262          | 0.002530725 | 3.1234307 | up |
| MM9LINCRNAEXON10679+_P1 | mouselincRNA1110 | 0.018026529 | 2.8343897 | up |
| ASMM9PARTA048055        | AK015937         | 0.023503464 | 2.124972  | up |
| humanlincRNA0574+_P1    | humanlincRNA0574 | 0.005158794 | 4.0270076 | up |
| ASMM9PARTA046956        | AK163075         | 0.000109    | 2.4392078 | up |
| ASMM9PARTA009216        |                  | 0.000849    | 2.533348  | up |
| mouselincRNA1231-_P1    | mouselincRNA1231 | 0.005538898 | 2.389583  | up |
| MM9LINCRNAEXON11228-_P1 | mouselincRNA0717 | 0.021706568 | 2.63723   | up |
| ASMM9PARTA004601        |                  | 0.011715838 | 3.3561337 | up |
| ASMM9PARTA009446        | Mageb16-ps2      | 0.030589927 | 2.1051407 | up |
| ASMM9PARTA009446        | Mageb16-ps2      | 0.030589927 | 2.1051407 | up |
| CO802520_P1             | humanlincRNA0879 | 0.0000066   | 2.5883179 | up |

|                         |                  |             |           |    |
|-------------------------|------------------|-------------|-----------|----|
| MM9LINCRNAEXON10673+_P1 | mouselincRNA1108 | 0.006572138 | 2.32608   | up |
| ASMM9PARTA015200        | 1700081H22Rik    | 0.013389994 | 3.0616462 | up |
| ASMM9PARTA004930        |                  | 0.019904397 | 2.1912074 | up |
| ASMM9PARTA012816        | Gm12006          | 0.001583721 | 7.3320594 | up |
| ASMM9PARTA012726        | Gm5645           | 0.038475864 | 2.8579035 | up |
| MM9LINCRNAEXON10217+_P1 | mouselincRNA1479 | 0.016544439 | 2.8432105 | up |
| ASMM9PARTA050812        | AK009724         | 0.006954367 | 2.0454316 | up |
| mouselincRNA1179+_P1    | mouselincRNA1179 | 0.03601607  | 2.379505  | up |
| ASMM9PARTA010111        | Gm10977          | 0.0000479   | 2.5837293 | up |
| MM9LINCRNAEXON10620+_P1 | mouselincRNA1234 | 0.030851863 | 2.3540404 | up |
| CUST_737_P1426073487    | uc.258           | 0.002995235 | 2.1320958 | up |
| ASMM9PARTA012436        | Gm15480          | 0.043778133 | 2.0910826 | up |
| ASMM9PARTA047044        | AK133925         | 0.0000815   | 3.7127237 | up |
| ASMM9PARTA003403        |                  | 0.000492    | 2.1165648 | up |
| ASMM9PARTA006650        |                  | 0.045557506 | 2.1677904 | up |
| CUST_600_P1426073487    | uc.121           | 0.008882767 | 3.2375226 | up |
| ASMM9PARTA016823        | BC037032         | 0.020691348 | 2.032411  | up |
| ASMM9PARTA016400        | Gm12204          | 0.003139618 | 3.0570884 | up |
| ASMM9PARTA006996        |                  | 0.00206722  | 2.9668393 | up |
| ASMM9PARTA002567        |                  | 0.000494    | 3.2631228 | up |
| ASMM9PARTA013489        | Gm12071          | 0.027105387 | 2.742475  | up |
| ASMM9PARTA008655        |                  | 0.001307275 | 4.81924   | up |
| ASMM9PARTA008655        |                  | 0.001307275 | 4.81924   | up |
| ASMM9PARTA008655        |                  | 0.001307275 | 4.81924   | up |
| ASMM9PARTA018423        | Ear-ps8          | 0.008499214 | 2.6247387 | up |
| ASMM9PARTA003440        |                  | 0.000623    | 2.7618341 | up |
| ASMM9PARTA009152        |                  | 0.000451    | 2.2848554 | up |
| ASMM9PARTA014524        | Gm16144          | 0.019369109 | 2.0858865 | up |
| ASMM9PARTA015108        | AV039307         | 0.0000173   | 3.0902739 | up |
| ASMM9PARTA015108        | AV039307         | 0.0000173   | 3.0902739 | up |
| ASMM9PARTA015108        | AV039307         | 0.0000173   | 3.0902739 | up |
| ASMM9PARTA015108        | AV039307         | 0.0000173   | 3.0902739 | up |
| ASMM9PARTA001481        |                  | 0.005561674 | 2.865427  | up |
| MM9LINCRNAEXON11830+_P1 | mouselincRNA0272 | 0.021750178 | 2.0327263 | up |
| ASMM9PARTA012145        | Gm11830          | 0.001228827 | 2.2805362 | up |
| ASMM9PARTA009768        | Gm8385           | 0.049983535 | 2.176528  | up |
| AV570450_P1             | humanlincRNA0329 | 0.0000283   | 2.0598383 | up |
| ASMM9PARTA006076        |                  | 0.002344161 | 2.1693492 | up |
| ASMM9PARTA005435        |                  | 0.00000402  | 5.980378  | up |
| ASMM9PARTA013440        | Nctc1            | 0.016879411 | 4.01852   | up |
| ASMM9PARTA048214        | AK170928         | 0.00462574  | 3.4809973 | up |
| ASMM9PARTA048214        | AK170928         | 0.00462574  | 3.4809973 | up |
| ASMM9PARTA048214        | AK170928         | 0.00462574  | 3.4809973 | up |
| ASMM9PARTA007740        |                  | 0.000695    | 2.0377164 | up |
| ASMM9PARTA012692        | Gm9436           | 0.044637505 | 2.4307625 | up |
| ASMM9PARTA010117        | Olfr833-ps1      | 0.002780625 | 2.83065   | up |
| ASMM9PARTA012155        | Gm9043           | 0.007666988 | 2.166605  | up |
| ASMM9PARTA006854        |                  | 0.003844349 | 2.5852573 | up |
| MM9LINCRNAEXON11261+_P1 | mouselincRNA0611 | 0.021174934 | 2.4959385 | up |

|                         |                  |             |           |    |
|-------------------------|------------------|-------------|-----------|----|
| ASMM9PARTA003577        |                  | 0.024286496 | 2.25274   | up |
| ASMM9PARTA050677        | AK085609         | 0.02927942  | 2.7250395 | up |
| ASMM9PARTA002799        |                  | 0.005829373 | 3.6962624 | up |
| ASMM9PARTA015078        | Gm15050          | 0.048169628 | 3.3300498 | up |
| ASMM9PARTA001730        |                  | 0.002490886 | 3.3468084 | up |
| ASMM9PARTA051270        | AK027968         | 0.036336716 | 2.0395389 | up |
| MM9LINCRNAEXON11619+_P1 | mouselincRNA0430 | 0.03901233  | 2.3357518 | up |
| CUST_72_PI426409190     | Gm13155          | 0.0000926   | 2.2347572 | up |
| ASMM9PARTA019336        | AC132234.1       | 0.00000426  | 2.4943562 | up |
| ASMM9PARTA016885        | Gm14233          | 0.036307264 | 2.569906  | up |
| ASMM9PARTA016885        | Gm14233          | 0.036307264 | 2.569906  | up |
| ASMM9PARTA002195        |                  | 0.0179232   | 2.3497405 | up |
| ASMM9PARTA002066        |                  | 0.00713263  | 2.773211  | up |
| CUST_57_PI426073487     | uc.59            | 0.039604124 | 2.2466028 | up |
| ASMM9PARTA016764        | Gm13364          | 0.02203558  | 2.316017  | up |
| ASMM9PARTA001716        |                  | 0.000755    | 2.2343197 | up |
| ASMM9PARTA006533        |                  | 0.015066444 | 2.0008142 | up |
| ASMM9PARTA001870        |                  | 0.035680737 | 2.050223  | up |
| ASMM9PARTA013831        | Gm7375           | 0.024381729 | 2.5395808 | up |
| ASMM9PARTA019160        | RP24-230H12.5    | 0.0000243   | 2.4092183 | up |
| ASMM9PARTA014536        | Gm11532          | 0.003093464 | 3.0682335 | up |
| ASMM9PARTA047419        | AK031668         | 0.047120072 | 2.5715313 | up |
| ASMM9PARTA003674        |                  | 0.010078838 | 3.4842553 | up |
| ASMM9PARTA010974        | Gm11256          | 0.005050893 | 2.0879426 | up |
| ASMM9PARTA012414        | Gm12383          | 0.002204431 | 2.5984976 | up |
| MM9LINCRNAEXON11454-_P1 | mouselincRNA0481 | 0.006875185 | 3.946548  | up |
| ASMM9PARTA000626        |                  | 0.011875407 | 2.1246278 | up |
| ASMM9PARTA048947        | Strbp            | 0.013653743 | 2.5091367 | up |
| ASMM9PARTA048947        | Strbp            | 0.013653743 | 2.5091367 | up |
| ASMM9PARTA048947        | Strbp            | 0.013653743 | 2.5091367 | up |
| ASMM9PARTA048947        | Strbp            | 0.013653743 | 2.5091367 | up |
| MM9LINCRNAEXON10665-_P1 | mouselincRNA1101 | 0.000631    | 2.9414248 | up |
| MM9LINCRNAEXON11728+_P1 |                  | 0.005330466 | 5.3235664 | up |
| ASMM9PARTA005235        |                  | 0.007320527 | 2.7590816 | up |
| ASMM9PARTA005235        |                  | 0.007320527 | 2.7590816 | up |
| ASMM9PARTA005235        |                  | 0.007320527 | 2.7590816 | up |
| ASMM9PARTA013034        | Gm15379          | 0.009083724 | 2.697996  | up |
| ASMM9PARTA015476        | Hoxa11as         | 0.000499    | 2.3473916 | up |
| CK378914_P1             | humanlincRNA1553 | 0.004313443 | 3.8119788 | up |
| ASMM9PARTA051052        | AK138089         | 0.040168382 | 2.1072538 | up |
| ASMM9PARTA017953        | 1700109F18Rik    | 0.005890129 | 2.3121471 | up |
| ASMM9PARTA004458        |                  | 0.002207072 | 2.5306082 | up |
| ASMM9PARTA012488        | Gm11283          | 0.008321202 | 3.794433  | up |
| ASMM9PARTA005058        |                  | 0.000521    | 2.9792387 | up |
| ASMM9PARTA003127        |                  | 0.021392446 | 2.0916479 | up |
| ASMM9PARTA050768        | AK020061         | 0.04279583  | 2.9761534 | up |
| ASMM9PARTA049866        | AK052888         | 0.017459173 | 2.2204773 | up |
| mouselincRNA0238-_P1    | mouselincRNA0238 | 0.006306958 | 3.0674076 | up |
| ASMM9PARTA047894        | myo 10           | 0.017273339 | 2.5141213 | up |

|                         |                  |             |           |    |
|-------------------------|------------------|-------------|-----------|----|
| BB791535_P1             | humanlincRNA2428 | 0.0000116   | 2.735673  | up |
| ASMM9PARTA050876        | AK077481         | 0.009983076 | 2.242444  | up |
| ASMM9PARTA006154        |                  | 0.000104    | 2.0245643 | up |
| ASMM9PARTA014483        | Gm12729          | 0.005225903 | 2.72301   | up |
| ASMM9PARTA019549        | 9930038B18Rik    | 0.043335248 | 2.403109  | up |
| ASMM9PARTA017474        | 0610009B14Rik    | 0.000000919 | 3.3637536 | up |
| ASMM9PARTA050498        | AK079912         | 0.011036999 | 3.5525525 | up |
| ASMM9PARTA001256        |                  | 0.040841885 | 2.3475182 | up |
| ASMM9PARTA010668        | Gm11905          | 0.049895674 | 3.3166773 | up |
| ASMM9PARTA050583        | AK085986         | 0.002406458 | 2.5434663 | up |
| AI503337_P1             | mouselincRNA0302 | 0.009075766 | 2.4152875 | up |
| ASMM9PARTA005712        |                  | 0.030666744 | 2.3799417 | up |
| CF355830_P1             | humanlincRNA0960 | 0.02487194  | 2.2648835 | up |
| BY568487_P1             | humanlincRNA0565 | 0.02050637  | 3.4512465 | up |
| ASMM9PARTA044984        | Dio3os           | 0.005266411 | 3.4866302 | up |
| ASMM9PARTA005919        |                  | 0.033191428 | 2.1472256 | up |
| MM9LINCRNAEXON11077+_P1 |                  | 0.00000508  | 3.4989035 | up |
| ASMM9PARTA018081        | Airn             | 0.037468906 | 2.248969  | up |
| ASMM9PARTA016368        | Gm15958          | 0.007254214 | 2.480366  | up |
| ASMM9PARTA000283        |                  | 0.017055232 | 2.1937919 | up |
| ASMM9PARTA004641        |                  | 0.014735124 | 2.5504835 | up |
| ASMM9PARTA014456        | C230012O17Rik    | 0.039158992 | 2.6919045 | up |
| ASMM9PARTA051077        | AK215526         | 0.029262166 | 2.1506581 | up |
| ASMM9PARTA001427        |                  | 0.01684309  | 2.308539  | up |
| ASMM9PARTA001427        |                  | 0.01684309  | 2.308539  | up |
| MM9LINCRNAEXON10187+_P1 | mouselincRNA1448 | 0.025601119 | 2.4678285 | up |
| mouselincRNA0161+_P1    | mouselincRNA0161 | 0.0000579   | 2.0598936 | up |
| MM9LINCRNAEXON11320+_P1 | mouselincRNA0663 | 0.010808975 | 2.344869  | up |
| MM9LINCRNAEXON11530+_P1 | mouselincRNA0380 | 0.048439283 | 2.4950743 | up |
| ASMM9PARTA009332        | 4930463O16Rik    | 0.000231    | 3.7154183 | up |
| BG079320_P1             | humanlincRNA2275 | 0.013950573 | 2.4456704 | up |
| ASMM9PARTA048065        | KIAA0143         | 0.04088732  | 2.5226336 | up |
| ASMM9PARTA001680        |                  | 0.008360054 | 2.6108751 | up |
| ASMM9PARTA047659        | AK076988         | 0.003413783 | 2.5410407 | up |
| ASMM9PARTA003081        |                  | 0.040052835 | 2.8499064 | up |
| ASMM9PARTA044808        | Speer7-ps1       | 0.001616899 | 4.6775584 | up |
| ASMM9PARTA005149        |                  | 0.007181083 | 2.3194792 | up |
| ASMM9PARTA047063        | BC028808         | 0.027978338 | 2.3615115 | up |
| ASMM9PARTA013479        | Gm16479          | 0.001211516 | 2.2726977 | up |
| ASMM9PARTA007855        |                  | 0.000931    | 2.3980644 | up |
| ASMM9PARTA009678        | Gm5135           | 0.029795032 | 4.449114  | up |
| ASMM9PARTA018758        | Gm6413           | 0.000402    | 2.1950967 | up |
| ASMM9PARTA048894        | AK085760         | 0.002668793 | 2.4059541 | up |
| MM9LINCRNAEXON10181+_P1 | mouselincRNA1444 | 0.041006327 | 2.43731   | up |
| ASMM9PARTA001946        |                  | 0.00000344  | 2.5476496 | up |
| humanlincRNA0944+_P1    | humanlincRNA0944 | 0.000148    | 2.6896589 | up |
| ASMM9PARTA049066        | AK040009         | 0.00464691  | 2.0944953 | up |
| ASMM9PARTA004299        |                  | 0.011978923 | 3.120061  | up |
| ASMM9PARTA007731        |                  | 0.005444197 | 2.2421808 | up |

|                         |                  |             |           |    |
|-------------------------|------------------|-------------|-----------|----|
| ASMM9PARTA016541        | Zfp133-ps        | 0.003675306 | 5.749109  | up |
| ASMM9PARTA003726        |                  | 0.002481517 | 8.849999  | up |
| ASMM9PARTA003828        |                  | 0.001181659 | 2.3281505 | up |
| humanlincRNA0506+_P1    | humanlincRNA0506 | 0.003871118 | 2.8186488 | up |
| ASMM9PARTA015212        | Gm16548          | 0.03651878  | 2.3569872 | up |
| ASMM9PARTA015212        | Gm16548          | 0.03651878  | 2.3569872 | up |
| ASMM9PARTA017761        | Gm5432           | 0.000127    | 3.140777  | up |
| ASMM9PARTA050128        | AK019745         | 0.001796412 | 2.8389366 | up |
| humanlincRNA0220+_P1    | humanlincRNA0220 | 0.001739725 | 2.381016  | up |
| ASMM9PARTA016822        | Gm14747          | 0.019921113 | 2.4263756 | up |
| ASMM9PARTA015216        | Abhd1            | 0.007528605 | 2.438796  | up |
| ASMM9PARTA015216        | Abhd1            | 0.007528605 | 2.438796  | up |
| ASMM9PARTA010177        | Gm6973           | 0.001154182 | 3.1507869 | up |
| ASMM9PARTA047665        | AK148313         | 0.002132029 | 2.1279442 | up |
| ASMM9PARTA049540        | AK076817         | 0.004377925 | 2.7078555 | up |
| ASMM9PARTA017233        | 4933401P06Rik    | 0.013323069 | 2.0364592 | up |
| ASMM9PARTA002192        |                  | 0.000333    | 2.180026  | up |
| ASMM9PARTA007514        |                  | 0.021719767 | 2.2976751 | up |
| ASMM9PARTA018410        | D630014O11Rik    | 0.023319945 | 2.791825  | up |
| ASMM9PARTA001246        |                  | 0.018042874 | 3.5425942 | up |
| ASMM9PARTA045375        | E030003E18Rik    | 0.00000186  | 2.176617  | up |
| CA876182_P1             | mouselincRNA1216 | 0.001648179 | 3.0747747 | up |
| ASMM9PARTA046716        | mKIAA0696        | 0.04783114  | 2.027925  | up |
| humanlincRNA2366+_P1    | humanlincRNA2366 | 0.00000467  | 3.7282948 | up |
| ASMM9PARTA003818        |                  | 0.04744372  | 2.2373643 | up |
| ASMM9PARTA050913        | Zfp787           | 0.04403898  | 4.8922796 | up |
| ASMM9PARTA014507        | Gm15941          | 0.023029583 | 2.4174545 | up |
| ASMM9PARTA014507        | Gm15941          | 0.023029583 | 2.4174545 | up |
| ASMM9PARTA014507        | Gm15941          | 0.023029583 | 2.4174545 | up |
| ASMM9PARTA014507        | Gm15941          | 0.023029583 | 2.4174545 | up |
| ASMM9PARTA051157        | AK019792         | 0.023315659 | 2.347423  | up |
| ASMM9PARTA005275        |                  | 0.020657301 | 2.1455505 | up |
| ASMM9PARTA045163        | Asb7             | 0.02555406  | 2.444701  | up |
| ASMM9PARTA045163        | Asb7             | 0.02555406  | 2.444701  | up |
| ASMM9PARTA045163        | Asb7             | 0.02555406  | 2.444701  | up |
| ASMM9PARTA046159        | Ankrd11          | 0.003794145 | 2.1204615 | up |
| ASMM9PARTA050279        | AK049146         | 0.017445127 | 2.9101717 | up |
| MM9LINCRNAEXON10684+_P1 | mouselincRNA1112 | 0.019686526 | 2.287231  | up |
| ASMM9PARTA046068        | Dhx9             | 0.0000311   | 6.169505  | up |
| ASMM9PARTA009351        |                  | 0.007093248 | 2.2248828 | up |
| MM9LINCRNAEXON11741+_P1 |                  | 0.010595723 | 2.4476902 | up |
| ASMM9PARTA046655        | AK051928         | 0.016343374 | 2.2576847 | up |
| ASMM9PARTA017687        | 4930522O17Rik    | 0.002738122 | 2.2901874 | up |
| humanlincRNA1841+_P1    | humanlincRNA1841 | 0.001601763 | 3.3601506 | up |
| ASMM9PARTA007563        |                  | 0.023464495 | 2.0654676 | up |
| MM9LINCRNAEXON11156-_P1 |                  | 0.000604    | 2.5789385 | up |
| ASMM9PARTA015209        | Gm13553          | 0.01703982  | 2.1824431 | up |
| ASMM9PARTA007824        |                  | 0.00862385  | 2.8821995 | up |
| ASMM9PARTA007824        |                  | 0.00862385  | 2.8821995 | up |

|                         |                  |             |           |    |
|-------------------------|------------------|-------------|-----------|----|
| ASMM9PARTA007824        |                  | 0.00862385  | 2.8821995 | up |
| ASMM9PARTA007824        |                  | 0.00862385  | 2.8821995 | up |
| CUST_612_PI426073487    | uc.133           | 0.002941481 | 2.6404295 | up |
| ASMM9PARTA018864        | AC132684.1       | 0.01411625  | 6.39298   | up |
| ASMM9PARTA018864        | AC132684.1       | 0.01411625  | 6.39298   | up |
| ASMM9PARTA016256        | E130215H24Rik    | 0.041712936 | 2.6932282 | up |
| ASMM9PARTA046571        | BC030469         | 0.009143457 | 2.0525916 | up |
| ASMM9PARTA015217        | AI838599         | 0.005204718 | 2.2516434 | up |
| ASMM9PARTA049544        | AK145161         | 0.003340717 | 2.1015143 | up |
| ASMM9PARTA003824        |                  | 0.01249576  | 2.9139717 | up |
| ASMM9PARTA017541        | A230087F16Rik    | 0.0000433   | 6.9646907 | up |
| ASMM9PARTA003233        |                  | 0.000275    | 2.5251708 | up |
| ASMM9PARTA045185        | Ralgps2          | 0.001484566 | 2.0597565 | up |
| ASMM9PARTA045185        | Ralgps2          | 0.001484566 | 2.0597565 | up |
| ASMM9PARTA045185        | Ralgps2          | 0.001484566 | 2.0597565 | up |
| ASMM9PARTA045185        | Ralgps2          | 0.001484566 | 2.0597565 | up |
| ASMM9PARTA045185        | Ralgps2          | 0.001484566 | 2.0597565 | up |
| ASMM9PARTA045185        | Ralgps2          | 0.001484566 | 2.0597565 | up |
| ASMM9PARTA017183        | 1700086P04Rik    | 0.012110479 | 5.7909408 | up |
| ASMM9PARTA047792        | Cntn1            | 0.002157284 | 4.5487175 | up |
| ASMM9PARTA047792        | Cntn1            | 0.002157284 | 4.5487175 | up |
| ASMM9PARTA019134        | AC124756.1       | 0.00000321  | 2.1052601 | up |
| ASMM9PARTA006006        |                  | 0.005482468 | 3.2565968 | up |
| ASMM9PARTA001671        |                  | 0.000203    | 2.0235047 | up |
| ASMM9PARTA017205        | 4930511M06Rik    | 0.009175573 | 2.41494   | up |
| ASMM9PARTA007010        |                  | 0.000042    | 2.2311423 | up |
| ASMM9PARTA051308        | AK038653         | 0.018635966 | 2.0771594 | up |
| CUST_356_PI426073487    | uc.358           | 0.034310702 | 2.4101782 | up |
| ASMM9PARTA005120        |                  | 0.001965555 | 2.521717  | up |
| ASMM9PARTA047688        | apo              | 0.03793647  | 2.0667164 | up |
| CUST_196_PI426073487    | uc.198           | 0.00177622  | 2.047007  | up |
| ASMM9PARTA015795        | 3110053B16Rik    | 0.002151803 | 5.238408  | up |
| ASMM9PARTA006603        |                  | 0.013116387 | 3.620633  | up |
| ASMM9PARTA050886        | AK042904         | 0.015276106 | 3.445386  | up |
| ASMM9PARTA050886        | AK042904         | 0.015276106 | 3.445386  | up |
| ASMM9PARTA007351        |                  | 0.001895917 | 2.0549374 | up |
| ASMM9PARTA007351        |                  | 0.001895917 | 2.0549374 | up |
| humanlincRNA1995+_P1    | humanlincRNA1995 | 0.013025064 | 3.0825474 | up |
| ASMM9PARTA015601        | Gm13274          | 0.024606442 | 2.4788258 | up |
| ASMM9PARTA015467        | Gm15966          | 0.002925332 | 2.0849266 | up |
| ASMM9PARTA007580        |                  | 0.003245979 | 4.4922867 | up |
| ASMM9PARTA004423        |                  | 0.009521837 | 4.258889  | up |
| ASMM9PARTA005347        |                  | 0.033537924 | 2.7579272 | up |
| ASMM9PARTA050385        | AK080631         | 0.001908285 | 2.344752  | up |
| MM9LINCRNAEXON10047+_P1 | mouselincRNA1651 | 0.0000418   | 2.2476697 | up |
| ASMM9PARTA001176        |                  | 0.027657757 | 2.1731987 | up |
| MM9LINCRNAEXON11616+_P1 | mouselincRNA0430 | 0.020025373 | 2.6535373 | up |
| ASMM9PARTA050165        | AK020320         | 0.014991377 | 2.2686698 | up |
| ASMM9PARTA050165        | AK020320         | 0.014991377 | 2.2686698 | up |

|                         |                  |             |           |    |
|-------------------------|------------------|-------------|-----------|----|
| ASMM9PARTA013917        | Gm12798          | 0.006897513 | 2.0001042 | up |
| ASMM9PARTA002410        |                  | 0.030456366 | 2.031518  | up |
| ASMM9PARTA011938        | Hmgb1-ps1        | 0.00000959  | 2.5220013 | up |
| MM9LINCRNAEXON11078+_P1 | mouselincRNA0819 | 0.0000214   | 2.3410268 | up |
| ASMM9PARTA012466        | Gm4992           | 0.0441232   | 2.3853023 | up |
| ASMM9PARTA049238        | AK029171         | 0.019044857 | 6.588273  | up |
| ASMM9PARTA016811        | Gm12300          | 0.002102381 | 7.7662644 | up |
| ASMM9PARTA016811        | Gm12300          | 0.002102381 | 7.7662644 | up |
| ASMM9PARTA016410        | D230022J07Rik    | 0.028153684 | 2.0599937 | up |
| ASMM9PARTA016410        | D230022J07Rik    | 0.028153684 | 2.0599937 | up |
| MM9LINCRNAEXON10212-_P1 | mouselincRNA1479 | 0.0000616   | 2.1968613 | up |
| AA791803_P1             | mouselincRNA0980 | 0.001661601 | 3.8054485 | up |
| MM9LINCRNAEXON11926+_P1 | mouselincRNA0194 | 0.004795502 | 2.4484649 | up |
| ASMM9PARTA013353        | Gm15079          | 0.0000113   | 3.9250944 | up |
| CUST_158_P1426409190    |                  | 0.026826974 | 2.3801663 | up |
| MM9LINCRNAEXON11627-_P1 |                  | 0.002532851 | 2.3205512 | up |
| MM9LINCRNAEXON10964-_P1 |                  | 0.014502617 | 2.076026  | up |
| ASMM9PARTA050126        | AK019631         | 0.0000387   | 3.73109   | up |
| humanlincRNA0164-_P1    | humanlincRNA0164 | 0.0000945   | 2.7659109 | up |
| ASMM9PARTA004138        |                  | 0.001632887 | 2.006748  | up |
| humanlincRNA1273-_P1    | humanlincRNA1273 | 0.024615398 | 3.6337423 | up |
| ASMM9PARTA002658        |                  | 0.03918609  | 2.1415236 | up |
| ASMM9PARTA004849        |                  | 0.00000377  | 2.2213795 | up |
| CK377992_P1             | humanlincRNA1344 | 0.001810144 | 3.1504905 | up |
| ASMM9PARTA002944        |                  | 0.042605232 | 2.2926154 | up |
| ASMM9PARTA001472        |                  | 0.045620795 | 2.2508643 | up |
| ASMM9PARTA000683        |                  | 0.00000935  | 2.9192622 | up |
| ASMM9PARTA009045        |                  | 0.02410775  | 2.426114  | up |
| ASMM9PARTA044906        | 2410002O22Rik    | 0.0000193   | 2.4992902 | up |
| ASMM9PARTA044906        | 2410002O22Rik    | 0.0000193   | 2.4992902 | up |
| ASMM9PARTA044906        | 2410002O22Rik    | 0.0000193   | 2.4992902 | up |
| ASMM9PARTA044906        | 2410002O22Rik    | 0.0000193   | 2.4992902 | up |
| MM9LINCRNAEXON10048-_P1 |                  | 0.00575058  | 2.8061473 | up |
| ASMM9PARTA011011        | Gm13550          | 0.00648795  | 2.5241878 | up |
| ASMM9PARTA002149        |                  | 0.0000887   | 2.6577852 | up |
| ASMM9PARTA004214        |                  | 0.0000706   | 2.3478658 | up |
| ASMM9PARTA010194        | AI314831         | 0.016917923 | 2.1526694 | up |
| ASMM9PARTA050991        | Isg20l1          | 0.02310275  | 3.5411718 | up |
| ASMM9PARTA050991        | Isg20l1          | 0.02310275  | 3.5411718 | up |
| CUST_365_P1426073487    | uc.367           | 0.0000197   | 2.4493606 | up |
| ASMM9PARTA014985        | 1500016L03Rik    | 0.000565    | 2.0157654 | up |
| ASMM9PARTA045575        | 5830416P10Rik    | 0.001016318 | 2.147838  | up |
| ASMM9PARTA016669        | Gm16211          | 0.024743207 | 2.8097625 | up |
| ASMM9PARTA009548        | Gm8556           | 0.000162    | 2.6073902 | up |
| ASMM9PARTA002598        |                  | 0.008508823 | 2.2654462 | up |
| ASMM9PARTA050472        | AK080655         | 0.00000595  | 2.170994  | up |
| ASMM9PARTA003936        |                  | 0.000113    | 2.1957402 | up |
| ASMM9PARTA010960        | Gm14987          | 0.027119735 | 2.5412476 | up |
| ASMM9PARTA018523        | Airn             | 2.29E-08    | 33.75424  | up |

|                         |                  |             |           |    |
|-------------------------|------------------|-------------|-----------|----|
| ASMM9PARTA005165        |                  | 0.041299827 | 2.4284294 | up |
| ASMM9PARTA017481        | Gm13001          | 0.009409199 | 2.5680745 | up |
| ASMM9PARTA004710        |                  | 0.037228215 | 2.2064583 | up |
| ASMM9PARTA015421        | Gm15469          | 0.001661283 | 2.1588826 | up |
| ASMM9PARTA009181        |                  | 0.029672513 | 2.098135  | up |
| ASMM9PARTA009181        |                  | 0.029672513 | 2.098135  | up |
| ASMM9PARTA009181        |                  | 0.029672513 | 2.098135  | up |
| ASMM9PARTA009181        |                  | 0.029672513 | 2.098135  | up |
| ASMM9PARTA009181        |                  | 0.029672513 | 2.098135  | up |
| CUST_421_PI426073487    | uc.423           | 0.00062     | 2.4833558 | up |
| ASMM9PARTA049260        | AK015373         | 0.024819553 | 2.0319338 | up |
| ASMM9PARTA045392        | Airn             | 0.000155    | 2.9775214 | up |
| ASMM9PARTA045392        | Airn             | 0.000155    | 2.9775214 | up |
| ASMM9PARTA017191        | Gm15585          | 0.009732045 | 2.138788  | up |
| ASMM9PARTA011140        | Gm7199           | 0.02367411  | 3.3975704 | up |
| MM9LINCRNAEXON10998-_P1 | mouselincRNA0882 | 0.005738695 | 4.906354  | up |
| ASMM9PARTA051664        | Trip4            | 0.003507051 | 2.7870605 | up |
| ASMM9PARTA051664        | Trip4            | 0.003507051 | 2.7870605 | up |
| ASMM9PARTA051664        | Trip4            | 0.003507051 | 2.7870605 | up |
| ASMM9PARTA013480        | Gm13024          | 0.0000984   | 2.2979128 | up |
| ASMM9PARTA019101        | Gm13619          | 0.001322876 | 2.0551283 | up |
| ASMM9PARTA019101        | Gm13619          | 0.001322876 | 2.0551283 | up |
| ASMM9PARTA019016        | RP24-357O21.3    | 0.000312    | 2.2969394 | up |
| ASMM9PARTA012429        | Gm12587          | 0.00000916  | 2.0209234 | up |
| ASMM9PARTA013144        | Gm13081          | 0.012217936 | 2.1202137 | up |
| mouselincRNA0436+_P1    | mouselincRNA0436 | 0.014841333 | 3.0859246 | up |
| ASMM9PARTA005904        |                  | 0.027762242 | 2.3599787 | up |
| ASMM9PARTA047035        | AK149240         | 0.0000592   | 2.4694784 | up |
| ASMM9PARTA018606        | RP23-126F14.6    | 0.0000536   | 3.9785273 | up |
| humanlincRNA1385-_P1    | humanlincRNA1385 | 0.0000148   | 3.2987742 | up |
| ASMM9PARTA000607        |                  | 0.000748    | 2.084755  | up |
| ASMM9PARTA000607        |                  | 0.000748    | 2.084755  | up |
| ASMM9PARTA051782        | AK142198         | 0.000134    | 2.6232998 | up |
| ASMM9PARTA051782        | AK142198         | 0.000134    | 2.6232998 | up |
| ASMM9PARTA051782        | AK142198         | 0.000134    | 2.6232998 | up |
| ASMM9PARTA051782        | AK142198         | 0.000134    | 2.6232998 | up |
| ASMM9PARTA051782        | AK142198         | 0.000134    | 2.6232998 | up |
| ASMM9PARTA008632        |                  | 0.007343965 | 2.7453694 | up |
| ASMM9PARTA006527        |                  | 0.006562627 | 2.8661845 | up |
| ASMM9PARTA049188        | AK080416         | 0.000606    | 2.6531026 | up |
| ASMM9PARTA012197        | Gm12331          | 0.00000528  | 2.0659242 | up |
| ASMM9PARTA014186        | AV039307         | 0.0000105   | 2.5422335 | up |
| ASMM9PARTA014186        | AV039307         | 0.0000105   | 2.5422335 | up |
| ASMM9PARTA014186        | AV039307         | 0.0000105   | 2.5422335 | up |
| ASMM9PARTA014186        | AV039307         | 0.0000105   | 2.5422335 | up |
| ASMM9PARTA015852        | Gm13629          | 0.0000134   | 2.238708  | up |
| ASMM9PARTA015852        | Gm13629          | 0.0000134   | 2.238708  | up |
| ASMM9PARTA009653        | Airn             | 0.0000562   | 2.5570414 | up |
| ASMM9PARTA004251        |                  | 0.00076     | 2.1167417 | up |



|                          |                  |             |           |    |
|--------------------------|------------------|-------------|-----------|----|
| ASMM9PARTA018993         | RP23-122J17.10   | 0.034804277 | 2.7474499 | up |
| ASMM9PARTA006719         |                  | 0.000258    | 2.0034661 | up |
| ASMM9PARTA047011         | AK163447         | 0.013146942 | 2.2898543 | up |
| ASMM9PARTA013866         | 4930455G09Rik    | 0.000221    | 3.3048015 | up |
| ASMM9PARTA017858         | Gm2639           | 0.019559832 | 2.7024176 | up |
| ASMM9PARTA046645         | IL-TIFb          | 0.00000338  | 17.057747 | up |
| ASMM9PARTA014593         | Gm15169          | 0.000156    | 4.1738105 | up |
| ASMM9PARTA009944         | Gm10075          | 0.0000562   | 2.1748219 | up |
| humanlincRNA1016-_P1     | humanlincRNA1016 | 0.003384101 | 2.128588  | up |
| ASMM9PARTA010113         | Hsp25-ps1        | 0.00000987  | 2.3264437 | up |
| ASMM9PARTA049247         | AK040741         | 0.030605968 | 2.3500462 | up |
| ASMM9PARTA015658         | 4930517O19Rik    | 0.037017796 | 6.714502  | up |
| MM9LINC RNAEXON10743-_P1 | mouselincRNA1136 | 0.013886482 | 2.4767566 | up |
| ASMM9PARTA007248         |                  | 0.028717691 | 2.045148  | up |
| ASMM9PARTA000933         |                  | 0.032545682 | 2.2437923 | up |
| ASMM9PARTA018302         | Gm4475           | 0.000195    | 2.545118  | up |
| AI550063_P1              | mouselincRNA0690 | 0.000679    | 2.3616488 | up |
| ASMM9PARTA013839         | 9330185C12Rik    | 0.026340034 | 2.731352  | up |
| ASMM9PARTA002853         |                  | 0.00000256  | 2.0878062 | up |
| ASMM9PARTA002853         |                  | 0.00000256  | 2.0878062 | up |
| ASMM9PARTA002853         |                  | 0.00000256  | 2.0878062 | up |
| ASMM9PARTA011165         | Gm13858          | 0.0037146   | 2.946392  | up |
| ASMM9PARTA002573         |                  | 0.00000063  | 3.1626308 | up |
| ASMM9PARTA045380         | 4930412O13Rik    | 0.0000187   | 2.1888402 | up |
| MM9LINC RNAEXON10474+_P1 | mouselincRNA1297 | 0.004138014 | 5.0234838 | up |
| ASMM9PARTA005229         |                  | 0.000000177 | 11.208046 | up |
| ASMM9PARTA048564         | AK009785         | 0.041366693 | 3.2158453 | up |
| ASMM9PARTA050840         | AK050360         | 0.001704258 | 2.6885808 | up |
| ASMM9PARTA011266         | Gm12311          | 0.00017     | 2.0989513 | up |
| ASMM9PARTA016011         | Gm10396          | 0.003340071 | 3.9637914 | up |
| ASMM9PARTA004792         |                  | 0.001186573 | 2.8262455 | up |
| ASMM9PARTA015228         | Gm12576          | 0.032033097 | 2.9835026 | up |
| ASMM9PARTA017884         | B230206L02Rik    | 0.000035    | 2.4762156 | up |
| ASMM9PARTA003730         |                  | 0.003354916 | 2.3954244 | up |
| ASMM9PARTA047058         | Rtn-1A           | 0.001174494 | 2.5337267 | up |
| ASMM9PARTA047058         | Rtn-1A           | 0.001174494 | 2.5337267 | up |
| humanlincRNA0587-_P1     | humanlincRNA0587 | 0.04345736  | 2.438723  | up |
| ASMM9PARTA009539         | Foxl1            | 0.000535    | 2.0323555 | up |
| MM9LINC RNAEXON11457+_P1 | mouselincRNA0481 | 0.021859514 | 2.1053188 | up |
| ASMM9PARTA005729         |                  | 0.024246696 | 2.3730893 | up |
| ASMM9PARTA012956         | Gm11246          | 0.000000689 | 2.4768918 | up |
| ASMM9PARTA011230         | Gm14738          | 0.01458008  | 3.0252018 | up |
| MM9LINC RNAEXON11100-_P1 |                  | 0.000261    | 2.8333008 | up |
| ASMM9PARTA019116         | Gm16404          | 0.013188779 | 2.1679473 | up |
| ASMM9PARTA045894         | Gm2694           | 0.00000171  | 2.1997645 | up |
| ASMM9PARTA019156         | RP24-391B9.1     | 0.019646995 | 2.2116127 | up |
| ASMM9PARTA050441         | AK040808         | 0.021075083 | 2.0316467 | up |
| ASMM9PARTA050441         | AK040808         | 0.021075083 | 2.0316467 | up |
| ASMM9PARTA017258         | D830026I12Rik    | 0.034503005 | 3.0406442 | up |

|                           |                   |             |           |    |
|---------------------------|-------------------|-------------|-----------|----|
| humanlincRNA2046+_P1      | humanlincRNA2046  | 0.03543032  | 2.6785324 | up |
| ASMM9PARTA048888          | Gnas              | 0.0000411   | 2.7940338 | up |
| ASMM9PARTA048888          | Gnas              | 0.0000411   | 2.7940338 | up |
| ASMM9PARTA002287          |                   | 0.038130965 | 2.4139993 | up |
| ASMM9PARTA010091          | Speer4c           | 0.028170228 | 3.2082398 | up |
| ASMM9PARTA006843          |                   | 0.001345258 | 2.399634  | up |
| ASMM9PARTA003909          |                   | 0.010097478 | 3.0227451 | up |
| ASMM9PARTA048456          | AK156750          | 0.025179787 | 2.1211462 | up |
| ASMM9PARTA048456          | AK156750          | 0.025179787 | 2.1211462 | up |
| MM9LINC RNA EXON11202-_P1 |                   | 0.000239    | 2.1383839 | up |
| ASMM9PARTA051330          | Ttc13             | 0.0000309   | 2.6243196 | up |
| CUST_475_P1426073487      | uc.477            | 0.001307104 | 2.459413  | up |
| ASMM9PARTA047428          | 1700049E17Rik     | 0.000213    | 2.248075  | up |
| ASMM9PARTA013513          | Gm15556           | 0.001056074 | 2.274923  | up |
| ASMM9PARTA013513          | Gm15556           | 0.001056074 | 2.274923  | up |
| ASMM9PARTA013513          | Gm15556           | 0.001056074 | 2.274923  | up |
| ASMM9PARTA017655          | Gm14033           | 0.000000593 | 2.4470801 | up |
| MM9LINC RNA EXON11392-_P1 | mouse lincRNA0603 | 0.001932479 | 2.1581032 | up |
| ASMM9PARTA006188          |                   | 0.0000404   | 3.1907637 | up |
| ASMM9PARTA006188          |                   | 0.0000404   | 3.1907637 | up |
| mouse lincRNA0344+_P1     | mouse lincRNA0344 | 0.009298035 | 2.2420862 | up |
| ASMM9PARTA014556          | Gm13723           | 0.006329532 | 2.246708  | up |
| ASMM9PARTA009901          | 5830416P10Rik     | 0.00000156  | 2.3955135 | up |
| ASMM9PARTA008907          |                   | 0.03937839  | 15.776631 | up |
| MM9LINC RNA EXON10522+_P1 | mouse lincRNA1351 | 0.03050216  | 2.6011755 | up |
| MM9LINC RNA EXON11785-_P1 |                   | 0.001973419 | 3.510876  | up |
| ASMM9PARTA046930          | AK018772          | 0.0000305   | 4.4427795 | up |
| ASMM9PARTA007292          |                   | 0.025005484 | 2.4554706 | up |
| ASMM9PARTA007292          |                   | 0.025005484 | 2.4554706 | up |
| ASMM9PARTA007292          |                   | 0.025005484 | 2.4554706 | up |
| ASMM9PARTA012893          | Hmgbl-ps5         | 0.001829744 | 2.1575558 | up |
| ASMM9PARTA050302          | mKIAA1386         | 0.012203548 | 2.085032  | up |
| ASMM9PARTA007306          |                   | 0.024012117 | 2.2535694 | up |
| ASMM9PARTA010688          | Gm15059           | 0.0000383   | 2.3767042 | up |
| ASMM9PARTA046432          | AK048993          | 0.023261486 | 2.132466  | up |
| mouse lincRNA1667-_P1     | mouse lincRNA1667 | 0.002626843 | 2.184947  | up |
| ASMM9PARTA046016          | Olfr856-ps1       | 0.005357082 | 4.7804413 | up |
| ASMM9PARTA002453          |                   | 0.045923255 | 2.0737858 | up |
| ASMM9PARTA018017          | Gm16169           | 0.006929116 | 3.9912865 | up |
| ASMM9PARTA003722          |                   | 0.00039     | 2.1613472 | up |
| ASMM9PARTA006841          |                   | 0.03256857  | 2.2611759 | up |
| ASMM9PARTA049457          | AK138660          | 0.0000686   | 3.2273483 | up |
| ASMM9PARTA047303          | Heatr1            | 0.045637984 | 2.3177323 | up |
| ASMM9PARTA047303          | Heatr1            | 0.045637984 | 2.3177323 | up |
| ASMM9PARTA047303          | Heatr1            | 0.045637984 | 2.3177323 | up |
| ASMM9PARTA007125          |                   | 0.000000953 | 3.1511805 | up |
| ASMM9PARTA045563          | Airn              | 0.000227    | 2.1253428 | up |
| ASMM9PARTA003603          |                   | 0.000353    | 2.7487905 | up |
| ASMM9PARTA003671          |                   | 0.03990971  | 2.5798256 | up |

|                         |                  |             |           |    |
|-------------------------|------------------|-------------|-----------|----|
| ASMM9PARTA045571        | Rmst             | 0.0000641   | 2.0183094 | up |
| ASMM9PARTA046136        | AK039635         | 0.001451956 | 2.1305637 | up |
| ASMM9PARTA046136        | AK039635         | 0.001451956 | 2.1305637 | up |
| ASMM9PARTA014537        | 1500016L03Rik    | 0.0000434   | 5.442869  | up |
| AV486351_P1             | humanlincRNA0937 | 0.030061444 | 2.528093  | up |
| MM9LINCRNAEXON10071+_P1 | mouselincRNA1506 | 0.0000148   | 3.4166107 | up |
| ASMM9PARTA018262        | Ear-ps10         | 0.000686    | 2.7500083 | up |
| BC156060_P1             | mouselincRNA1038 | 0.0000679   | 18.584675 | up |
| BC156060_P1             | mouselincRNA1038 | 0.0000679   | 18.584675 | up |
| BC156060_P1             | mouselincRNA1038 | 0.0000679   | 18.584675 | up |
| BC156060_P1             | mouselincRNA1038 | 0.0000679   | 18.584675 | up |
| BC156060_P1             | mouselincRNA1038 | 0.0000679   | 18.584675 | up |
| ASMM9PARTA004884        |                  | 0.000000411 | 2.192306  | up |
| ASMM9PARTA012278        | Gm15794          | 0.016605083 | 2.245738  | up |
| ASMM9PARTA003161        |                  | 0.0000969   | 2.4660194 | up |
| ASMM9PARTA004616        |                  | 0.012928735 | 2.2643428 | up |
| ASMM9PARTA014167        | Gm13944          | 0.0000129   | 17.70349  | up |
| ASMM9PARTA014167        | Gm13944          | 0.0000129   | 17.70349  | up |
| ASMM9PARTA014167        | Gm13944          | 0.0000129   | 17.70349  | up |
| ASMM9PARTA047833        | AK142028         | 0.00701822  | 2.3403025 | up |
| ASMM9PARTA047833        | AK142028         | 0.00701822  | 2.3403025 | up |
| ASMM9PARTA045545        | AI427809         | 0.004380761 | 2.6451612 | up |
| humanlincRNA1193- P1    | humanlincRNA1193 | 0.00000384  | 3.5577245 | up |
| ASMM9PARTA006594        |                  | 0.002527592 | 2.2236533 | up |
| ASMM9PARTA002496        |                  | 0.005256313 | 2.9569044 | up |
| ASMM9PARTA002496        |                  | 0.005256313 | 2.9569044 | up |
| MM9LINCRNAEXON12014+_P1 | mouselincRNA0024 | 0.005953616 | 2.0437932 | up |
| ASMM9PARTA018122        | Gm6413           | 0.038960703 | 2.9755666 | up |
| ASMM9PARTA049015        | AK052812         | 0.001652858 | 3.9565578 | up |
| ASMM9PARTA048635        | 2810051F02Rik    | 0.000329    | 2.3189695 | up |
| ASMM9PARTA049815        | AK042933         | 0.00000931  | 3.8712125 | up |
| ASMM9PARTA011317        | Hmgbl-ps3        | 0.00000566  | 2.1366735 | up |
| ASMM9PARTA051121        | Lrrc49           | 0.0000888   | 8.12811   | up |
| ASMM9PARTA051121        | Lrrc49           | 0.0000888   | 8.12811   | up |
| ASMM9PARTA051121        | Lrrc49           | 0.0000888   | 8.12811   | up |
| ASMM9PARTA049391        | Ptpn22           | 0.005117974 | 2.18758   | up |
| ASMM9PARTA049809        | AK030206         | 0.00000105  | 2.8406954 | up |
| ASMM9PARTA049809        | AK030206         | 0.00000105  | 2.8406954 | up |
| ASMM9PARTA016008        | Gm12159          | 0.003832694 | 2.296931  | up |
| ASMM9PARTA050695        | AK035901         | 0.000138    | 2.2840664 | up |
| ASMM9PARTA015540        | Gm14271          | 0.016793156 | 2.6326547 | up |
| ASMM9PARTA050412        | AK006664         | 0.000278    | 2.7338235 | up |
| ASMM9PARTA002084        |                  | 0.00000329  | 2.6720037 | up |
| MM9LINCRNAEXON11381+_P1 | mouselincRNA0588 | 0.006293111 | 2.622957  | up |
| ASMM9PARTA002399        |                  | 0.008305885 | 2.9394252 | up |
| ASMM9PARTA014232        | Gm15169          | 0.002152088 | 2.8948379 | up |
| ASMM9PARTA003264        |                  | 0.028498638 | 2.1745765 | up |
| ASMM9PARTA007558        |                  | 0.00000693  | 3.2392747 | up |
| ASMM9PARTA003147        |                  | 0.0000461   | 5.46201   | up |

|                         |                  |             |           |    |
|-------------------------|------------------|-------------|-----------|----|
| CUST_375_PI426073487    | uc.377           | 0.014030896 | 4.6396375 | up |
| ASMM9PARTA050230        | AK131834         | 0.000225    | 28.298044 | up |
| CUST_428_PI426073487    | uc.430           | 0.0000202   | 3.0572083 | up |
| CUST_428_PI426073487    | uc.430           | 0.0000202   | 3.0572083 | up |
| CUST_428_PI426073487    | uc.430           | 0.0000202   | 3.0572083 | up |
| CUST_428_PI426073487    | uc.430           | 0.0000202   | 3.0572083 | up |
| CUST_428_PI426073487    | uc.430           | 0.0000202   | 3.0572083 | up |
| ASMM9PARTA006828        |                  | 0.0000243   | 2.2162519 | up |
| ASMM9PARTA006973        |                  | 0.001523258 | 2.5381515 | up |
| ASMM9PARTA006973        |                  | 0.001523258 | 2.5381515 | up |
| ASMM9PARTA049559        | BC051212         | 0.004809617 | 2.3670506 | up |
| CUST_887_PI426073487    | uc.408           | 0.000111    | 2.1381514 | up |
| ASMM9PARTA007283        |                  | 0.000206    | 7.3439097 | up |
| ASMM9PARTA015431        | Gm15918          | 0.000055    | 2.0622482 | up |
| ASMM9PARTA019374        | 4930412M03Rik    | 0.008444748 | 2.0580752 | up |
| ASMM9PARTA019550        | RP23-78F6.7      | 0.000129    | 2.3570538 | up |
| MM9LINCRNAEXON12034-_P1 | mouselincRNA0038 | 0.006064827 | 2.0999901 | up |
| ASMM9PARTA003916        |                  | 0.00000393  | 3.192659  | up |
| MM9LINCRNAEXON10204-_P1 | mouselincRNA1471 | 0.000257    | 2.4786034 | up |
| ASMM9PARTA005240        |                  | 0.000559    | 2.7824998 | up |
| ASMM9PARTA048669        | AK165766         | 0.000584    | 2.213304  | up |
| ASMM9PARTA048669        | AK165766         | 0.000584    | 2.213304  | up |
| ASMM9PARTA048669        | AK165766         | 0.000584    | 2.213304  | up |
| mouselincRNA1511+_P1    | mouselincRNA1511 | 0.024254475 | 2.6243196 | up |
| ASMM9PARTA011219        | Gm8812           | 0.000988    | 2.7603712 | up |
| ASMM9PARTA001853        |                  | 0.000969    | 2.3442802 | up |
| ASMM9PARTA047938        | AK082117         | 0.000005    | 2.5264413 | up |
| ASMM9PARTA047221        | AK040557         | 0.0000218   | 3.353819  | up |
| ASMM9PARTA047221        | AK040557         | 0.0000218   | 3.353819  | up |
| ASMM9PARTA047221        | AK040557         | 0.0000218   | 3.353819  | up |
| ASMM9PARTA019295        | RP23-133I8.1     | 0.0000299   | 2.1335657 | up |
| ASMM9PARTA047783        | Ugcgl2           | 0.00000437  | 3.8473175 | up |
| ASMM9PARTA003032        |                  | 0.008523298 | 3.0427992 | up |
| ASMM9PARTA003032        |                  | 0.008523298 | 3.0427992 | up |
| ASMM9PARTA003032        |                  | 0.008523298 | 3.0427992 | up |
| ASMM9PARTA003716        |                  | 0.0000245   | 2.1912527 | up |
| ASMM9PARTA002372        |                  | 0.001381885 | 2.600094  | up |
| ASMM9PARTA012055        | Gm12118          | 0.000126    | 2.197365  | up |
| AA915284_P1             | mouselincRNA0740 | 0.007956133 | 3.8496263 | up |
| ASMM9PARTA013691        | Gm14162          | 0.000344    | 2.1395185 | up |
| ASMM9PARTA000845        |                  | 0.00083     | 2.6613104 | up |
| ASMM9PARTA018548        | Airn             | 0.00000196  | 3.6642368 | up |
| ASMM9PARTA018548        | Airn             | 0.00000196  | 3.6642368 | up |
| ASMM9PARTA014091        | 4930419G24Rik    | 0.047696058 | 3.3682609 | up |
| ASMM9PARTA014091        | 4930419G24Rik    | 0.047696058 | 3.3682609 | up |
| ASMM9PARTA046327        | AK009351         | 0.0000433   | 3.1334538 | up |
| ASMM9PARTA010097        | Gm10361          | 0.000382    | 2.2060933 | up |
| ASMM9PARTA000537        |                  | 0.00000117  | 5.2932167 | up |
| ASMM9PARTA015283        | Gm16677          | 0.0000674   | 2.0244634 | up |

|                         |                  |             |            |    |
|-------------------------|------------------|-------------|------------|----|
| ASMM9PARTA014139        | Gm3160           | 0.00000624  | 2.0727074  | up |
| ASMM9PARTA014139        | Gm3160           | 0.00000624  | 2.0727074  | up |
| ASMM9PARTA047832        | AK052076         | 0.008204426 | 2.5495343  | up |
| ASMM9PARTA015674        | Gm13112          | 0.0000242   | 4.0338807  | up |
| ASMM9PARTA015674        | Gm13112          | 0.0000242   | 4.0338807  | up |
| ASMM9PARTA013565        | Gm14473          | 0.002184913 | 2.1388512  | up |
| ASMM9PARTA003572        |                  | 0.000103    | 3.4023733  | up |
| ASMM9PARTA049446        | AK031919         | 0.001955584 | 2.2646444  | up |
| ASMM9PARTA000684        |                  | 0.000000751 | 3.8835692  | up |
| ASMM9PARTA013124        | Gm4996           | 0.0000216   | 2.2034204  | up |
| ASMM9PARTA046430        | AK153590         | 0.029219106 | 2.4526875  | up |
| ASMM9PARTA013453        | Gm16471          | 0.000728    | 2.7894201  | up |
| ASMM9PARTA015970        | A730036117Rik    | 0.024104962 | 2.2069778  | up |
| ASMM9PARTA049072        | Rasgrp2          | 0.000000213 | 2.1650708  | up |
| ASMM9PARTA047252        | AK149260         | 0.00081     | 2.0493648  | up |
| ASMM9PARTA012045        | Gm14788          | 0.0000751   | 2.4017513  | up |
| ASMM9PARTA000876        |                  | 0.049603302 | 2.062359   | up |
| ASMM9PARTA000876        |                  | 0.049603302 | 2.062359   | up |
| ASMM9PARTA000876        |                  | 0.049603302 | 2.062359   | up |
| ASMM9PARTA012955        | Gm13932          | 0.000185    | 2.1489203  | up |
| CUST_499_PI426073487    | uc.19            | 0.008816327 | 2.7671895  | up |
| ASMM9PARTA045371        | 5033406O09Rik    | 0.000309    | 12.8328495 | up |
| ASMM9PARTA002899        |                  | 0.0000121   | 2.5946267  | up |
| ASMM9PARTA002899        |                  | 0.0000121   | 2.5946267  | up |
| ASMM9PARTA002899        |                  | 0.0000121   | 2.5946267  | up |
| ASMM9PARTA002899        |                  | 0.0000121   | 2.5946267  | up |
| ASMM9PARTA049183        | AK036371         | 0.002618839 | 2.3823323  | up |
| ASMM9PARTA002490        |                  | 0.0000806   | 2.655869   | up |
| ASMM9PARTA046929        | AK010044         | 0.038038343 | 22.237125  | up |
| ASMM9PARTA051072        | AK019737         | 0.003148946 | 2.5659835  | up |
| CUST_846_PI426073487    | uc.367           | 0.01564255  | 2.6767406  | up |
| ASMM9PARTA001331        |                  | 0.009780455 | 3.2017717  | up |
| ASMM9PARTA004510        |                  | 0.038085256 | 2.077547   | up |
| ASMM9PARTA013646        | D230017M19Rik    | 0.032388743 | 5.0653653  | up |
| ASMM9PARTA048743        | Ppp1r1c          | 0.000718    | 2.557851   | up |
| ASMM9PARTA006591        |                  | 0.019842729 | 3.4523509  | up |
| ASMM9PARTA048585        | C230097124Rik    | 0.000818    | 2.07183    | up |
| MM9LINCRNAEXON11899+_P1 | mouselincRNA0173 | 0.016981503 | 2.8582718  | up |
| MM9LINCRNAEXON11700+_P1 | mouselincRNA0335 | 0.005123737 | 2.6914     | up |
| CJ317124_P1             | humanlincRNA1977 | 0.0000198   | 7.333081   | up |
| MM9LINCRNAEXON12113-_P1 |                  | 0.0000059   | 2.6684735  | up |
| ASMM9PARTA019604        | Gm14598          | 0.000246    | 3.4617174  | up |
| ASMM9PARTA010437        | Cd47             | 0.0000212   | 4.32716    | up |
| ASMM9PARTA045591        | Gm11110          | 0.036867116 | 3.6468546  | up |
| ASMM9PARTA007871        |                  | 0.0000703   | 2.0995383  | up |
| ASMM9PARTA002148        |                  | 0.0000115   | 2.0013807  | up |
| ASMM9PARTA016965        | Gm16119          | 0.03382048  | 2.3199215  | up |
| ASMM9PARTA004077        |                  | 0.0000106   | 2.6248574  | up |
| ASMM9PARTA002181        |                  | 0.000333    | 2.3494198  | up |
| ASMM9PARTA008988        |                  | 0.0000971   | 2.025747   | up |

|                         |                  |             |           |    |
|-------------------------|------------------|-------------|-----------|----|
| EL605756_P1             | humanlincRNA0451 | 0.000056    | 3.613005  | up |
| ASMM9PARTA003760        |                  | 0.00000141  | 2.4757895 | up |
| ASMM9PARTA016760        | Gm2694           | 0.00019     | 5.326694  | up |
| ASMM9PARTA045310        | Gm11961          | 0.04806668  | 2.1525261 | up |
| ASMM9PARTA048972        | AK086826         | 0.0000198   | 2.6653178 | up |
| ASMM9PARTA049783        | Rps6ka1          | 0.0000646   | 2.4058597 | up |
| ASMM9PARTA006611        |                  | 0.013833252 | 2.5984473 | up |
| ASMM9PARTA000581        |                  | 0.0000377   | 2.1457024 | up |
| MM9LINCRNAEXON10767+_P1 | mouselincRNA1138 | 0.000154    | 2.4317145 | up |
| AV038163_P1             | humanlincRNA2267 | 0.0000274   | 2.2915192 | up |
| ASMM9PARTA004878        |                  | 0.018232044 | 2.2113686 | up |
| ASMM9PARTA003919        |                  | 0.00000216  | 2.2708077 | up |
| MM9LINCRNAEXON10396-_P1 | mouselincRNA1257 | 0.0000141   | 3.2808087 | up |
| ASMM9PARTA006908        |                  | 0.008430216 | 4.381537  | up |
| ASMM9PARTA009169        |                  | 0.0000247   | 2.889862  | up |
| ASMM9PARTA007450        |                  | 0.000134    | 2.3509471 | up |
| ASMM9PARTA019271        | AL928696.1       | 0.005473444 | 2.1196356 | up |
| ASMM9PARTA008305        |                  | 0.04622204  | 2.0878878 | up |
| ASMM9PARTA046796        | BC030470         | 0.0000127   | 2.2068095 | up |
| ASMM9PARTA018396        | Gm16404          | 0.012278657 | 2.3413486 | up |
| MM9LINCRNAEXON11795+_P1 | mouselincRNA0252 | 0.0000617   | 18.041677 | up |
| MM9LINCRNAEXON10103+_P1 | mouselincRNA1524 | 0.0003      | 5.9844313 | up |
| ASMM9PARTA015949        | 5330413P13Rik    | 0.018231718 | 2.1202192 | up |
| ASMM9PARTA004712        |                  | 0.003130417 | 3.137045  | up |
| MM9LINCRNAEXON10539-_P1 |                  | 0.000000669 | 9.163587  | up |
| ASMM9PARTA011271        | Gm13228          | 0.000255    | 2.3399453 | up |
| ASMM9PARTA018144        | Gm15051          | 0.0000882   | 2.5616744 | up |
| ASMM9PARTA011414        | Gm15778          | 0.0000194   | 2.1751525 | up |
| ASMM9PARTA003826        |                  | 0.0000314   | 5.6208506 | up |
| ASMM9PARTA007146        |                  | 0.003945055 | 2.0435443 | up |
| ASMM9PARTA002335        |                  | 0.000642    | 2.0657623 | up |
| ASMM9PARTA001043        |                  | 0.00013     | 2.2876415 | up |
| MM9LINCRNAEXON11872-_P1 | mouselincRNA0141 | 0.04465102  | 2.0433455 | up |
| ASMM9PARTA019208        | Gm14595          | 0.043605294 | 2.922996  | up |
| ASMM9PARTA001365        |                  | 0.0000174   | 2.3903117 | up |
| ASMM9PARTA000070        |                  | 0.0421954   | 4.916226  | up |
| ASMM9PARTA000070        |                  | 0.0421954   | 4.916226  | up |
| ASMM9PARTA012898        | Gm5396           | 0.0000202   | 2.09585   | up |
| ASMM9PARTA001969        |                  | 0.000178    | 5.015228  | up |
| ASMM9PARTA018095        | Gm16990          | 0.000293    | 3.7959373 | up |
| MM9LINCRNAEXON10492+_P1 | mouselincRNA1320 | 0.010376689 | 2.7581644 | up |
| ASMM9PARTA013698        | Gm13366          | 0.00309633  | 2.2090125 | up |
| ASMM9PARTA002671        |                  | 0.000461    | 2.0028193 | up |
| ASMM9PARTA014788        | B930095G15Rik    | 5.58E-08    | 4.029823  | up |
| ASMM9PARTA050069        | BC038278         | 0.03933176  | 2.8830078 | up |
| ASMM9PARTA048236        | AK182695         | 0.018807136 | 2.1764898 | up |
| ASMM9PARTA002260        |                  | 0.000305    | 3.2376847 | up |
| ASMM9PARTA002260        |                  | 0.000305    | 3.2376847 | up |
| ASMM9PARTA004889        |                  | 0.045090396 | 2.244647  | up |

|                         |                  |             |             |      |
|-------------------------|------------------|-------------|-------------|------|
| ASMM9PARTA019278        | Gm5226           | 0.0000159   | 2.3915865   | up   |
| ASMM9PARTA017528        | Gm13643          | 4.92E-08    | 6.467713    | up   |
| ASMM9PARTA010788        | Gm12261          | 0.0000106   | 2.017353    | up   |
| ASMM9PARTA014333        | 1500016L03Rik    | 0.001133286 | 6.2949452   | up   |
| ASMM9PARTA046928        | AK079404         | 0.008261258 | 8.877083    | up   |
| ASMM9PARTA012597        | Gm7958           | 0.045609962 | 2.0498455   | up   |
| MM9LINCRNAEXON10221-_P1 | mouselincRNA1483 | 0.025543272 | 2.5155814   | up   |
| ASMM9PARTA007101        |                  | 0.001445409 | 2.1238625   | up   |
| ASMM9PARTA016836        | Hoxb3os          | 0.000883    | 2.3799367   | up   |
| ASMM9PARTA016836        | Hoxb3os          | 0.000883    | 2.3799367   | up   |
| ASMM9PARTA016836        | Hoxb3os          | 0.000883    | 2.3799367   | up   |
| ASMM9PARTA044894        | C330024D21Rik    | 0.0000149   | 4.848213    | up   |
| ASMM9PARTA050456        | A530053G22Rik    | 0.000169    | 2.6750376   | up   |
| ASMM9PARTA014069        | A730017L22Rik    | 0.000206    | 2.3494983   | up   |
| MM9LINCRNAEXON12123+_P1 | mouselincRNA0129 | 0.000291    | 4.3230715   | up   |
| ASMM9PARTA004567        |                  | 0.0000481   | 2.9336364   | up   |
| CUST_662_P1426073487    | uc.183           | 0.00000438  | 2.3641312   | up   |
| ASMM9PARTA011990        | Lamr1-ps1        | 0.00000736  | 14.883051   | up   |
| ASMM9PARTA015799        | 5530601H04Rik    | 0.004917894 | 2.8705761   | up   |
| ASMM9PARTA008317        |                  | 0.039608467 | 0.313883934 | down |
| ASMM9PARTA010051        | Gm10497          | 0.000034    | 0.399063366 | down |
| ASMM9PARTA010051        | Gm10497          | 0.000034    | 0.399063366 | down |
| ASMM9PARTA010051        | Gm10497          | 0.000034    | 0.399063366 | down |
| ASMM9PARTA007800        |                  | 0.0000239   | 0.101912313 | down |
| ASMM9PARTA001658        |                  | 0.0000302   | 0.39969155  | down |
| ASMM9PARTA050620        | AK042016         | 0.000569    | 0.43446526  | down |
| ASMM9PARTA009163        |                  | 0.005812168 | 0.484695803 | down |
| ASMM9PARTA003870        |                  | 0.016687071 | 0.486223962 | down |
| ASMM9PARTA009086        |                  | 0.000203    | 0.322766163 | down |
| ASMM9PARTA003557        |                  | 0.000811    | 0.457844956 | down |
| ASMM9PARTA007767        |                  | 0.000575    | 0.3086745   | down |
| ASMM9PARTA050451        | TCR-beta chain   | 0.00000429  | 0.292112979 | down |
| ASMM9PARTA015180        | A530058N18Rik    | 0.000286    | 0.124095314 | down |
| ASMM9PARTA047362        | BC064451         | 0.000297    | 0.335039994 | down |
| ASMM9PARTA003503        |                  | 0.00000678  | 0.478635506 | down |
| ASMM9PARTA001783        |                  | 0.000192    | 0.251844535 | down |
| ASMM9PARTA049723        | AK017111         | 0.000589    | 0.281338745 | down |
| ASMM9PARTA051617        | AK039014         | 0.025748411 | 0.39605576  | down |
| ASMM9PARTA014191        | Gm12092          | 0.009861143 | 0.450306819 | down |
| CUST_195_P1426073487    | uc.197           | 0.000323    | 0.435374605 | down |
| ASMM9PARTA050522        | TCR-beta chain   | 0.004011236 | 0.370055001 | down |
| ASMM9PARTA000135        |                  | 0.008829746 | 0.33962861  | down |
| ASMM9PARTA002902        |                  | 0.024691721 | 0.213336883 | down |
| ASMM9PARTA045333        | 3110099E03Rik    | 0.002467179 | 0.226432662 | down |
| ASMM9PARTA005664        |                  | 0.001665762 | 0.495524301 | down |
| ASMM9PARTA047033        | AK043365         | 0.048594628 | 0.223587222 | down |
| ASMM9PARTA051451        | AK032255         | 0.011844053 | 0.413422455 | down |
| ASMM9PARTA018431        | RP24-397H7.1     | 0.001208038 | 0.205125777 | down |
| ASMM9PARTA050079        | 11-Sep           | 0.00000174  | 0.43810777  | down |

|                      |                |             |             |      |
|----------------------|----------------|-------------|-------------|------|
| ASMM9PARTA046323     | Ccdc138        | 0.041328423 | 0.490821346 | down |
| ASMM9PARTA047203     | AK135975       | 0.0002      | 0.348169412 | down |
| ASMM9PARTA046371     | C130026I21Rik  | 0.001128692 | 0.410246346 | down |
| ASMM9PARTA046371     | C130026I21Rik  | 0.001128692 | 0.410246346 | down |
| ASMM9PARTA004452     |                | 0.000032    | 0.19990009  | down |
| ASMM9PARTA045260     | 5330426P16Rik  | 0.000101    | 0.196487727 | down |
| ASMM9PARTA008971     |                | 0.000263    | 0.289310012 | down |
| ASMM9PARTA011381     | Mup-ps14       | 0.000106    | 0.205733632 | down |
| ASMM9PARTA050925     | AK046300       | 0.000783    | 0.444389577 | down |
| ASMM9PARTA050700     | TCR-beta chain | 0.0000158   | 0.203070194 | down |
| ASMM9PARTA006630     |                | 0.046415683 | 0.33069869  | down |
| ASMM9PARTA045862     | 1700086L19Rik  | 0.0000156   | 0.343948442 | down |
| ASMM9PARTA019893     |                | 0.005497582 | 0.240715866 | down |
| ASMM9PARTA000020     |                | 0.009681764 | 0.190124261 | down |
| ASMM9PARTA010105     | Ear-ps2        | 0.0000788   | 0.499098678 | down |
| ASMM9PARTA004261     |                | 0.0000512   | 0.433746426 | down |
| ASMM9PARTA045860     | A630072M18Rik  | 0.039366838 | 0.426909288 | down |
| ASMM9PARTA046300     | AK046727       | 0.00000411  | 0.231601142 | down |
| ASMM9PARTA015504     | Gm14455        | 0.000229    | 0.42260756  | down |
| ASMM9PARTA015504     | Gm14455        | 0.000229    | 0.42260756  | down |
| ASMM9PARTA015504     | Gm14455        | 0.000229    | 0.42260756  | down |
| ASMM9PARTA046870     | Ppp1r1b        | 0.00000167  | 0.229699117 | down |
| ASMM9PARTA000355     |                | 0.012110778 | 0.364568519 | down |
| ASMM9PARTA000355     |                | 0.012110778 | 0.364568519 | down |
| ASMM9PARTA000355     |                | 0.012110778 | 0.364568519 | down |
| ASMM9PARTA051179     | AK162599       | 0.000109    | 0.079461537 | down |
| ASMM9PARTA001669     |                | 0.0000184   | 0.1581305   | down |
| CUST_171_PI426409190 |                | 0.001080269 | 0.314804705 | down |
| ASMM9PARTA007331     |                | 0.003805738 | 0.456118316 | down |
| ASMM9PARTA014321     | Gm11767        | 0.000545    | 0.427068124 | down |
| ASMM9PARTA014321     | Gm11767        | 0.000545    | 0.427068124 | down |
| ASMM9PARTA014321     | Gm11767        | 0.000545    | 0.427068124 | down |
| ASMM9PARTA047728     | AK043659       | 0.001091563 | 0.173403731 | down |
| ASMM9PARTA014132     | 4930500J02Rik  | 0.000116    | 0.265754456 | down |
| ASMM9PARTA012474     | Gm13754        | 0.005948891 | 0.464414732 | down |
| ASMM9PARTA003854     |                | 0.000709    | 0.444267113 | down |
| ASMM9PARTA051038     | BC065393       | 0.000518    | 0.360109335 | down |
| ASMM9PARTA051038     | BC065393       | 0.000518    | 0.360109335 | down |
| ASMM9PARTA051038     | BC065393       | 0.000518    | 0.360109335 | down |
| ASMM9PARTA007216     |                | 0.0000121   | 0.470568748 | down |
| ASMM9PARTA007216     |                | 0.0000121   | 0.470568748 | down |
| ASMM9PARTA047990     | AK013627       | 0.0000104   | 0.089159903 | down |
| ASMM9PARTA003438     |                | 0.0000779   | 0.433145882 | down |
| ASMM9PARTA000308     |                | 0.000934    | 0.163460223 | down |
| ASMM9PARTA019551     |                | 0.013549506 | 0.243677453 | down |
| ASMM9PARTA007701     |                | 0.0000449   | 0.47207359  | down |
| ASMM9PARTA002484     |                | 0.00000037  | 0.238423621 | down |
| ASMM9PARTA048535     | AK122507       | 0.0000192   | 0.30549765  | down |
| ASMM9PARTA004828     |                | 0.015953597 | 0.490167846 | down |



|                         |                  |             |             |      |
|-------------------------|------------------|-------------|-------------|------|
| ASMM9PARTA014309        | D330050G23Rik    | 0.014582017 | 0.314954281 | down |
| ASMM9PARTA018479        | Gm16339          | 0.000073    | 0.311350659 | down |
| MM9LINCRNAEXON11015-_P1 |                  | 0.0000429   | 0.174036673 | down |
| ASMM9PARTA014587        | 1110050K14Rik    | 0.024782818 | 0.382123557 | down |
| ASMM9PARTA000477        |                  | 0.004741762 | 0.306028979 | down |
| ASMM9PARTA001867        |                  | 0.004047871 | 0.461227275 | down |
| ASMM9PARTA004491        |                  | 0.0000243   | 0.156446357 | down |
| ASMM9PARTA019195        | Mup-ps4          | 0.0000187   | 0.252131711 | down |
| ASMM9PARTA017897        | 7SK.148          | 0.000931    | 0.234949505 | down |
| ASMM9PARTA051087        | AK039837         | 0.012122608 | 0.328606126 | down |
| ASMM9PARTA017692        | Gm7819           | 0.0000152   | 0.308506623 | down |
| ASMM9PARTA050523        | TCR-beta chain   | 0.00000233  | 0.240691034 | down |
| ASMM9PARTA047164        | AK144886         | 0.012889706 | 0.38436079  | down |
| ASMM9PARTA050701        | TCR-beta chain   | 0.00000773  | 0.236070205 | down |
| ASMM9PARTA003326        |                  | 0.007560213 | 0.452716316 | down |
| ASMM9PARTA050923        | AK140288         | 0.001046875 | 0.41941541  | down |
| ASMM9PARTA050923        | AK140288         | 0.001046875 | 0.41941541  | down |
| ASMM9PARTA003714        |                  | 0.0000738   | 0.108725114 | down |
| ASMM9PARTA002564        |                  | 0.000359    | 0.32874612  | down |
| ASMM9PARTA007801        |                  | 0.000176    | 0.142176018 | down |
| ASMM9PARTA011779        | Kif22-ps         | 0.000934    | 0.492741062 | down |
| ASMM9PARTA048778        | AK131873         | 0.0000588   | 0.228500137 | down |
| ASMM9PARTA007449        |                  | 0.002682841 | 0.304663391 | down |
| ASMM9PARTA047383        | AK045624         | 0.008474385 | 0.277203351 | down |
| ASMM9PARTA010226        | Gm5859           | 0.001027677 | 0.380875234 | down |
| ASMM9PARTA006132        |                  | 0.003083901 | 0.398229472 | down |
| ASMM9PARTA006132        |                  | 0.003083901 | 0.398229472 | down |
| ASMM9PARTA006132        |                  | 0.003083901 | 0.398229472 | down |
| ASMM9PARTA048083        | AK045744         | 0.000626    | 0.327439509 | down |
| MM9LINCRNAEXON11857-_P1 | mouselincRNA0281 | 0.002778734 | 0.277427133 | down |
| ASMM9PARTA002424        |                  | 0.002141766 | 0.457013243 | down |
| ASMM9PARTA049898        | AK044041         | 0.0000226   | 0.216522109 | down |
| ASMM9PARTA009763        | Gm10599          | 0.000046    | 0.393542023 | down |
| ASMM9PARTA001917        |                  | 0.000534    | 0.368623097 | down |
| ASMM9PARTA002412        |                  | 0.0000748   | 0.486951264 | down |
| ASMM9PARTA012178        | Mup-ps13         | 0.000185    | 0.266223997 | down |
| ASMM9PARTA015630        | Dlx1as           | 0.0000273   | 0.389636207 | down |
| ASMM9PARTA004156        |                  | 0.000189    | 0.467837789 | down |
| ASMM9PARTA001455        |                  | 0.007929599 | 0.467930763 | down |
| ASMM9PARTA045969        | A1507597         | 0.002052181 | 0.478637407 | down |
| ASMM9PARTA003896        |                  | 0.000334    | 0.405885552 | down |
| ASMM9PARTA006529        |                  | 0.000161    | 0.181765846 | down |
| ASMM9PARTA006529        |                  | 0.000161    | 0.181765846 | down |
| ASMM9PARTA000938        |                  | 0.01583118  | 0.483355134 | down |
| ASMM9PARTA009931        | Gm5096           | 0.016972536 | 0.356938688 | down |
| ASMM9PARTA005519        |                  | 2.04E-09    | 0.022539075 | down |
| ASMM9PARTA009963        | Gm10282          | 0.002013233 | 0.443035375 | down |
| ASMM9PARTA018833        | Gm16315          | 0.0000574   | 0.429691604 | down |
| ASMM9PARTA018833        | Gm16315          | 0.0000574   | 0.429691604 | down |

|                         |                       |             |             |      |
|-------------------------|-----------------------|-------------|-------------|------|
| MM9LINCRNAEXON10535-_P1 |                       | 0.004745931 | 0.295375826 | down |
| ASMM9PARTA011789        | Gm12856               | 0.00126236  | 0.278329543 | down |
| ASMM9PARTA049348        | AK138412              | 0.000176    | 0.430449387 | down |
| ASMM9PARTA009220        |                       | 0.0000316   | 0.217465101 | down |
| ASMM9PARTA006695        |                       | 3.81E-09    | 0.034571801 | down |
| ASMM9PARTA002356        |                       | 0.0000479   | 0.408523867 | down |
| ASMM9PARTA002196        |                       | 0.00000147  | 0.133610882 | down |
| ASMM9PARTA002360        |                       | 0.000108    | 0.469904165 | down |
| ASMM9PARTA047513        | AK044426              | 0.002303171 | 0.269723446 | down |
| MM9LINCRNAEXON11962-_P1 |                       | 0.000193    | 0.452682706 | down |
| ASMM9PARTA019104        | AC104908.1            | 0.010129376 | 0.381206955 | down |
| ASMM9PARTA046259        | Gm4814                | 0.001954298 | 0.392278084 | down |
| ASMM9PARTA013927        | Gm16002               | 0.000132    | 0.223707571 | down |
| ASMM9PARTA017060        | G730013B05Rik         | 0.010660555 | 0.436872359 | down |
| ASMM9PARTA047761        | Fastkd3               | 0.000155    | 0.45856734  | down |
| ASMM9PARTA047761        | Fastkd3               | 0.000155    | 0.45856734  | down |
| ASMM9PARTA016945        | A230056P14Rik         | 0.000000214 | 0.047408037 | down |
| ASMM9PARTA005168        |                       | 0.0000346   | 0.427127153 | down |
| ASMM9PARTA049309        | AK049102              | 0.0000813   | 0.461088255 | down |
| ASMM9PARTA012912        | Mup-ps22              | 0.000000457 | 0.212015872 | down |
| ASMM9PARTA008228        |                       | 0.006670833 | 0.474443395 | down |
| ASMM9PARTA008228        |                       | 0.006670833 | 0.474443395 | down |
| AK039249_P1             | humanlincRNA1989      | 0.0000781   | 0.363585171 | down |
| ASMM9PARTA047251        | AK086245              | 0.000101    | 0.499246487 | down |
| ASMM9PARTA011898        | Mup-ps16              | 0.001047184 | 0.463997549 | down |
| ASMM9PARTA012332        | Mup-ps21              | 0.001055858 | 0.11001249  | down |
| ASMM9PARTA045941        | D830015G02Rik         | 0.000000201 | 0.031819172 | down |
| ASMM9PARTA050591        | TCRB                  | 0.00000581  | 0.310454801 | down |
| ASMM9PARTA003521        |                       | 0.0000421   | 0.458899514 | down |
| ASMM9PARTA046086        |                       | 0.001892755 | 0.135877055 | down |
| ASMM9PARTA050423        | TCR-beta chain        | 0.000127    | 0.224978484 | down |
| CUST_840_PI426073487    | uc.361                | 0.002104641 | 0.358530203 | down |
| ASMM9PARTA000311        |                       | 0.009939475 | 0.240465796 | down |
| ASMM9PARTA008547        |                       | 0.00745637  | 0.341563068 | down |
| ASMM9PARTA046121        |                       | 0.015893096 | 0.481733578 | down |
| ASMM9PARTA050353        | Tcrb                  | 0.000233    | 0.212933677 | down |
| ASMM9PARTA045146        | 3110070M22Rik         | 0.001705321 | 0.358304275 | down |
| ASMM9PARTA045146        | 3110070M22Rik         | 0.001705321 | 0.358304275 | down |
| ASMM9PARTA050521        | TCRBVbeta5.1/Jbeta1.5 | 0.00000341  | 0.203821074 | down |
| ASMM9PARTA000460        |                       | 0.000126    | 0.117057797 | down |
| ASMM9PARTA017466        | Dleu2                 | 0.000066    | 0.405998383 | down |
| ASMM9PARTA003733        |                       | 0.000304    | 0.48456416  | down |
| ASMM9PARTA003470        |                       | 0.002803225 | 0.493738556 | down |
| ASMM9PARTA012180        | Mup-ps17              | 0.00000365  | 0.189395812 | down |
| humanlincRNA0848-_P1    | humanlincRNA0848      | 0.014566735 | 0.463661632 | down |
| ASMM9PARTA045493        | D6Ertd474e            | 0.0000173   | 0.381655645 | down |
| MM9LINCRNAEXON11287-_P1 | mouselincRNA0638      | 0.0000362   | 0.194903218 | down |
| ASMM9PARTA009368        | Rgs11                 | 0.000181    | 0.469703866 | down |
| ASMM9PARTA016956        | Mup-ps4               | 0.000898    | 0.416643439 | down |

|                         |                  |             |             |      |
|-------------------------|------------------|-------------|-------------|------|
| ASMM9PARTA012907        | Gm11299          | 0.025686609 | 0.399218267 | down |
| ASMM9PARTA003511        |                  | 0.00000198  | 0.393958256 | down |
| ASMM9PARTA009940        | Spat511          | 0.000119    | 0.320462553 | down |
| ASMM9PARTA003754        |                  | 0.000488    | 0.177627983 | down |
| ASMM9PARTA002025        |                  | 0.016783688 | 0.291783312 | down |
| ASMM9PARTA019683        |                  | 0.002348356 | 0.141835027 | down |
| ASMM9PARTA001520        |                  | 0.0000337   | 0.22681199  | down |
| ASMM9PARTA009478        | Gm5973           | 0.002758365 | 0.44622082  | down |
| ASMM9PARTA009478        | Gm5973           | 0.002758365 | 0.44622082  | down |
| ASMM9PARTA016118        | Gm13974          | 0.000198    | 0.203421757 | down |
| CUST_212_PI426073487    | uc.214           | 0.01042787  | 0.293470183 | down |
| ASMM9PARTA017367        | Gm15511          | 0.011003451 | 0.498328755 | down |
| MM9LINCRNAEXON12015-_P1 | mouselincRNA0025 | 0.00000337  | 0.142997771 | down |
| ASMM9PARTA007538        |                  | 0.0001      | 0.386153121 | down |
| ASMM9PARTA003971        |                  | 0.000124    | 0.381781931 | down |
| CJ133294_P1             | mouselincRNA0439 | 0.001212857 | 0.433873625 | down |
| ASMM9PARTA009322        |                  | 0.0000873   | 0.354362026 | down |
| ASMM9PARTA046085        |                  | 0.024496904 | 0.240702679 | down |
| ASMM9PARTA044983        | Dlx1as           | 0.00000323  | 0.413622064 | down |
| ASMM9PARTA009159        |                  | 0.007852704 | 0.441887975 | down |
| ASMM9PARTA018023        | Gm15997          | 0.000385    | 0.210821888 | down |
| ASMM9PARTA001480        |                  | 0.005839385 | 0.33914706  | down |
| ASMM9PARTA047897        | etoile           | 0.0000835   | 0.405742671 | down |
| MM9LINCRNAEXON11045-_P1 | mouselincRNA0927 | 0.001219755 | 0.482678456 | down |
| ASMM9PARTA007901        |                  | 0.002469087 | 0.456291808 | down |
| ASMM9PARTA013751        | Mup-ps8          | 0.001575466 | 0.368122058 | down |
| MM9LINCRNAEXON10992+_P1 | mouselincRNA0879 | 0.000561    | 0.373536075 | down |
| ASMM9PARTA011619        | Gm14282          | 0.004663687 | 0.22783872  | down |
| MM9LINCRNAEXON10572-_P1 |                  | 0.037459962 | 0.471489012 | down |
| ASMM9PARTA001264        |                  | 0.001242206 | 0.094483612 | down |
| ASMM9PARTA014404        | A530058N18Rik    | 0.000548    | 0.379554579 | down |
| ASMM9PARTA016341        | D030055H07Rik    | 0.00015     | 0.293597858 | down |
| ASMM9PARTA016341        | D030055H07Rik    | 0.00015     | 0.293597858 | down |
| ASMM9PARTA001079        |                  | 0.006855164 | 0.459507403 | down |
| ASMM9PARTA002178        |                  | 0.00000763  | 0.324288547 | down |
| ASMM9PARTA009305        | 9930014A18Rik    | 0.000191    | 0.43897424  | down |
| ASMM9PARTA045316        | 4930429B21Rik    | 0.00000232  | 0.455881498 | down |
| ASMM9PARTA051561        |                  | 0.000000799 | 0.055206192 | down |
| ASMM9PARTA050490        | H4               | 0.000392    | 0.209170123 | down |
| ASMM9PARTA006592        |                  | 0.00000867  | 0.119514172 | down |
| ASMM9PARTA046131        | AK046737         | 0.00000401  | 0.162668873 | down |
| ASMM9PARTA049218        | AK018352         | 0.0000203   | 0.48610973  | down |
| ASMM9PARTA049218        | AK018352         | 0.0000203   | 0.48610973  | down |
| ASMM9PARTA049218        | AK018352         | 0.0000203   | 0.48610973  | down |
| ASMM9PARTA049218        | AK018352         | 0.0000203   | 0.48610973  | down |
| ASMM9PARTA049218        | AK018352         | 0.0000203   | 0.48610973  | down |
| ASMM9PARTA049218        | AK018352         | 0.0000203   | 0.48610973  | down |
| ASMM9PARTA009055        |                  | 0.00000132  | 0.213683606 | down |
| ASMM9PARTA002587        |                  | 0.000038    | 0.33936088  | down |
| ASMM9PARTA013542        | 4933400F03Rik    | 0.000042    | 0.453508487 | down |

|                         |               |             |             |      |
|-------------------------|---------------|-------------|-------------|------|
| ASMM9PARTA009176        |               | 0.014216131 | 0.16627155  | down |
| ASMM9PARTA018136        | 7SK.187       | 0.011725743 | 0.485966786 | down |
| ASMM9PARTA000706        |               | 0.0000612   | 0.463444215 | down |
| ASMM9PARTA012440        | Mup-ps9       | 0.001245018 | 0.1314179   | down |
| ASMM9PARTA045928        | 1700086L19Rik | 0.000212    | 0.496398184 | down |
| ASMM9PARTA014891        | 1500017E21Rik | 0.001625922 | 0.425490706 | down |
| ASMM9PARTA014891        | 1500017E21Rik | 0.001625922 | 0.425490706 | down |
| ASMM9PARTA046584        | AK083606      | 0.000000158 | 0.177903101 | down |
| CUST_68_PI426073487     | uc.70         | 0.000948    | 0.415883541 | down |
| ASMM9PARTA007579        |               | 0.0000557   | 0.424466738 | down |
| ASMM9PARTA012206        | Mup-ps18      | 0.000000317 | 0.211528158 | down |
| MM9LINCRNAEXON10524+_P1 |               | 0.000342    | 0.453116695 | down |
| ASMM9PARTA002713        |               | 0.015162923 | 0.406542207 | down |
| ASMM9PARTA004811        |               | 0.000822    | 0.409488168 | down |
| ASMM9PARTA007225        |               | 0.0000417   | 0.390213081 | down |
| ASMM9PARTA003788        |               | 0.00662248  | 0.498983371 | down |
| ASMM9PARTA001521        |               | 0.002458062 | 0.16738584  | down |
| ASMM9PARTA001685        |               | 0.000676    | 0.397302223 | down |
| MM9LINCRNAEXON11596-_P1 |               | 0.033909272 | 0.430286878 | down |
| ASMM9PARTA048146        | AK014704      | 0.0000422   | 0.373615595 | down |
| MM9LINCRNAEXON11333+_P1 |               | 0.007838967 | 0.403617592 | down |
| ASMM9PARTA006490        |               | 0.0000209   | 0.452405412 | down |
| ASMM9PARTA005371        |               | 0.001548424 | 0.410563335 | down |
| ASMM9PARTA048305        | 2610044O15Rik | 0.000726    | 0.453798173 | down |
| ASMM9PARTA017522        | A430108G06Rik | 0.002335597 | 0.450952531 | down |
| ASMM9PARTA005200        |               | 0.000314    | 0.488499429 | down |
| ASMM9PARTA001881        |               | 0.000191    | 0.324010105 | down |
| ASMM9PARTA009233        |               | 0.0000807   | 0.476629656 | down |
| ASMM9PARTA000393        |               | 0.000568    | 0.180369637 | down |
| ASMM9PARTA003080        |               | 0.002093591 | 0.485890611 | down |
| ASMM9PARTA001942        |               | 0.0000578   | 0.36479273  | down |
| ASMM9PARTA012988        | Gm13508       | 0.000631    | 0.196610537 | down |
| ASMM9PARTA002908        |               | 0.021026907 | 0.386527118 | down |
| ASMM9PARTA046338        | AK021003      | 0.000123    | 0.4893564   | down |
| ASMM9PARTA046147        | Gm10790       | 0.010687304 | 0.479638138 | down |
| ASMM9PARTA007387        |               | 0.00000131  | 0.314139297 | down |
| ASMM9PARTA006126        |               | 0.0000268   | 0.32936985  | down |
| MM9LINCRNAEXON10292-_P1 |               | 0.00000114  | 0.483198325 | down |
| ASMM9PARTA003798        |               | 0.00000677  | 0.437566808 | down |
| ASMM9PARTA008689        |               | 0.0000947   | 0.402865664 | down |
| ASMM9PARTA046883        | AK016591      | 0.003495385 | 0.303002721 | down |
| ASMM9PARTA011161        | Gm11807       | 0.0000376   | 0.202570441 | down |
| ASMM9PARTA016460        | Scnm1         | 0.005445863 | 0.371627076 | down |
| ASMM9PARTA016460        | Scnm1         | 0.005445863 | 0.371627076 | down |
| ASMM9PARTA016460        | Scnm1         | 0.005445863 | 0.371627076 | down |
| ASMM9PARTA005122        |               | 0.0000225   | 0.104280343 | down |
| CUST_88_PI426073487     | uc.90         | 0.029518077 | 0.444608594 | down |
| ASMM9PARTA047974        | 2610528E23Rik | 0.000274    | 0.145748085 | down |
| ASMM9PARTA047974        | 2610528E23Rik | 0.000274    | 0.145748085 | down |

|                         |                  |             |             |      |
|-------------------------|------------------|-------------|-------------|------|
| ASMM9PARTA047974        | 2610528E23Rik    | 0.000274    | 0.145748085 | down |
| ASMM9PARTA045237        | Wbscr25          | 0.04477869  | 0.460976156 | down |
| ASMM9PARTA047028        | AK080999         | 0.000114    | 0.494002489 | down |
| MM9LINCRNAEXON11965+_P1 |                  | 0.0000664   | 0.42166272  | down |
| ASMM9PARTA000019        |                  | 0.004348087 | 0.134884529 | down |
| ASMM9PARTA049400        | AK083230         | 7.22E-08    | 0.108214837 | down |
| MM9LINCRNAEXON10174-_P1 | mouselincRNA1432 | 0.000142    | 0.479370115 | down |
| ASMM9PARTA017947        | Gm16243          | 0.001079275 | 0.44769557  | down |
| ASMM9PARTA017947        | Gm16243          | 0.001079275 | 0.44769557  | down |
| ASMM9PARTA002081        |                  | 0.03852829  | 0.493468939 | down |
| ASMM9PARTA010972        | Mup-ps6          | 0.000168    | 0.361079957 | down |
| ASMM9PARTA004105        |                  | 0.001003109 | 0.144357708 | down |
| ASMM9PARTA004105        |                  | 0.001003109 | 0.144357708 | down |
| ASMM9PARTA004105        |                  | 0.001003109 | 0.144357708 | down |
| ASMM9PARTA002345        |                  | 0.00000176  | 0.396403856 | down |
| ASMM9PARTA010242        | Gm13303          | 0.000944    | 0.378500147 | down |
| ASMM9PARTA018257        | Gm2862           | 0.0007      | 0.433041499 | down |
| CUST_930_PI426073487    | uc.451           | 0.000000324 | 0.040965072 | down |
| MM9LINCRNAEXON11956-_P1 |                  | 0.01615673  | 0.238427066 | down |
| ASMM9PARTA051182        | AK166159         | 0.021293415 | 0.375476658 | down |
| MM9LINCRNAEXON10675-_P1 | mouselincRNA1108 | 0.004215053 | 0.253028434 | down |
| ASMM9PARTA015024        | 1700084C06Rik    | 0.002521763 | 0.434475737 | down |
| ASMM9PARTA015024        | 1700084C06Rik    | 0.002521763 | 0.434475737 | down |
| ASMM9PARTA015024        | 1700084C06Rik    | 0.002521763 | 0.434475737 | down |
| ASMM9PARTA003886        |                  | 0.0000322   | 0.361910956 | down |
| ASMM9PARTA050373        | AK044789         | 0.000577    | 0.350003498 | down |
| ASMM9PARTA050373        | AK044789         | 0.000577    | 0.350003498 | down |
| ASMM9PARTA050373        | AK044789         | 0.000577    | 0.350003498 | down |
| ASMM9PARTA050373        | AK044789         | 0.000577    | 0.350003498 | down |
| ASMM9PARTA050373        | AK044789         | 0.000577    | 0.350003498 | down |
| ASMM9PARTA006725        |                  | 0.000102    | 0.380803396 | down |
| ASMM9PARTA045641        | A530058N18Rik    | 0.00000564  | 0.136304592 | down |
| ASMM9PARTA049263        | mFLJ00088        | 0.00000136  | 0.33473042  | down |
| ASMM9PARTA049263        | mFLJ00088        | 0.00000136  | 0.33473042  | down |
| ASMM9PARTA049263        | mFLJ00088        | 0.00000136  | 0.33473042  | down |
| ASMM9PARTA049263        | mFLJ00088        | 0.00000136  | 0.33473042  | down |
| ASMM9PARTA001729        |                  | 0.011754142 | 0.45075794  | down |
| MM9LINCRNAEXON10980-_P1 | mouselincRNA0870 | 0.015735613 | 0.252876726 | down |
| ASMM9PARTA044962        | Gm11346          | 1.89E-08    | 0.474909352 | down |
| ASMM9PARTA048874        | AK084494         | 0.030334786 | 0.36925162  | down |
| ASMM9PARTA017010        | B630019A10Rik    | 0.024288595 | 0.437337802 | down |
| ASMM9PARTA017112        | Spata511         | 0.004330459 | 0.30310314  | down |
| ASMM9PARTA008695        |                  | 0.013166565 | 0.175783101 | down |
| ASMM9PARTA051759        | AK006734         | 0.000167    | 0.460945005 | down |
| MM9LINCRNAEXON11302-_P1 | mouselincRNA0654 | 0.00000982  | 0.161370279 | down |
| ASMM9PARTA001799        |                  | 0.0000919   | 0.448401538 | down |
| MM9LINCRNAEXON11692+_P1 | mouselincRNA0330 | 0.000122    | 0.412285175 | down |
| ASMM9PARTA047473        | AK139027         | 0.013969098 | 0.401531376 | down |
| ASMM9PARTA004722        |                  | 0.000329    | 0.427951681 | down |

|                      |                  |             |             |      |
|----------------------|------------------|-------------|-------------|------|
| ASMM9PARTA013654     | Gm11549          | 0.000525    | 0.368183036 | down |
| ASMM9PARTA011809     | Gm13302          | 0.001075092 | 0.351007201 | down |
| ASMM9PARTA047363     | AK005679         | 0.000183    | 0.417549959 | down |
| ASMM9PARTA001329     |                  | 0.011712784 | 0.447161197 | down |
| BX523225_P1          | mouselincRNA0093 | 0.001517506 | 0.478508004 | down |
| ASMM9PARTA044909     | Gprc2a-rs5       | 0.031269647 | 0.375628516 | down |
| ASMM9PARTA045845     |                  | 0.046913672 | 0.180081217 | down |
| ASMM9PARTA014591     | D430036J16Rik    | 0.0000045   | 0.476117313 | down |
| ASMM9PARTA001738     |                  | 0.00000276  | 0.033384697 | down |
| ASMM9PARTA050739     | AK087755         | 0.0000418   | 0.490795089 | down |
| ASMM9PARTA050739     | AK087755         | 0.0000418   | 0.490795089 | down |
| ASMM9PARTA050739     | AK087755         | 0.0000418   | 0.490795089 | down |
| ASMM9PARTA050739     | AK087755         | 0.0000418   | 0.490795089 | down |
| ASMM9PARTA050739     | AK087755         | 0.0000418   | 0.490795089 | down |
| ASMM9PARTA050739     | AK087755         | 0.0000418   | 0.490795089 | down |
| ASMM9PARTA050739     | AK087755         | 0.0000418   | 0.490795089 | down |
| ASMM9PARTA014773     | 1700027L20Rik    | 0.00000293  | 0.110327114 | down |
| ASMM9PARTA049940     | DQ687153         | 4.11E-08    | 0.316224852 | down |
| ASMM9PARTA009851     | Gm10087          | 0.00033     | 0.414774087 | down |
| ASMM9PARTA006426     |                  | 0.018828645 | 0.36172493  | down |
| ASMM9PARTA049034     | AK046168         | 0.04949233  | 0.467118937 | down |
| ASMM9PARTA004304     |                  | 0.0000215   | 0.267441069 | down |
| CUST_700_PI426073487 | uc.221           | 0.001269442 | 0.389230506 | down |
| ASMM9PARTA048873     | AK163667         | 0.00000841  | 0.076403124 | down |
| ASMM9PARTA049459     | AK136882         | 0.006390123 | 0.486200062 | down |
| ASMM9PARTA015587     | Gm14453          | 0.031341296 | 0.46306666  | down |
| ASMM9PARTA050807     | AK038589         | 0.003236465 | 0.315316943 | down |
| ASMM9PARTA001615     |                  | 0.000018    | 0.263614892 | down |
| ASMM9PARTA009100     |                  | 0.000533    | 0.485551705 | down |
| ASMM9PARTA015758     | Gm11789          | 0.000655    | 0.36514085  | down |
| ASMM9PARTA015015     | H2-Ea-ps         | 0.000108    | 0.02235174  | down |
| ASMM9PARTA014858     | A830009L08Rik    | 0.000000818 | 0.210256271 | down |
| ASMM9PARTA008461     |                  | 0.000077    | 0.452635538 | down |
| ASMM9PARTA050492     | TCR-beta chain   | 0.00000633  | 0.194287871 | down |
| ASMM9PARTA004677     |                  | 0.004429004 | 0.423951118 | down |
| ASMM9PARTA045562     | Deaf1            | 0.04672281  | 0.280080797 | down |
| ASMM9PARTA045562     | Deaf1            | 0.04672281  | 0.280080797 | down |
| ASMM9PARTA045562     | Deaf1            | 0.04672281  | 0.280080797 | down |
| ASMM9PARTA045562     | Deaf1            | 0.04672281  | 0.280080797 | down |
| ASMM9PARTA004064     |                  | 0.0000537   | 0.485527329 | down |
| ASMM9PARTA012505     | Gm10601          | 0.0000483   | 0.435915268 | down |
| ASMM9PARTA013857     | Gm13480          | 0.00000179  | 0.447703888 | down |
| ASMM9PARTA017269     | A530058N18Rik    | 0.000000023 | 0.164670937 | down |
| ASMM9PARTA049498     | AK005639         | 0.003026774 | 0.452728634 | down |
| ASMM9PARTA002826     |                  | 0.0000049   | 0.419513168 | down |
| ASMM9PARTA050491     | AK018014         | 0.000000169 | 0.212603158 | down |
| ASMM9PARTA017696     | 1700080G11Rik    | 0.000113    | 0.489871803 | down |
| ASMM9PARTA008936     |                  | 0.000139    | 0.347466172 | down |
| ASMM9PARTA006929     |                  | 0.006430599 | 0.332361464 | down |
| ASMM9PARTA004743     |                  | 0.0000155   | 0.149895674 | down |

|                         |                  |             |             |      |
|-------------------------|------------------|-------------|-------------|------|
| ASMM9PARTA008669        |                  | 0.03349627  | 0.470678118 | down |
| ASMM9PARTA006044        |                  | 0.004024913 | 0.393909808 | down |
| ASMM9PARTA003873        |                  | 0.023796065 | 0.365870033 | down |
| ASMM9PARTA005503        |                  | 1.52E-08    | 0.461531936 | down |
| ASMM9PARTA015289        | Gm13111          | 0.000227    | 0.487843691 | down |
| ASMM9PARTA015289        | Gm13111          | 0.000227    | 0.487843691 | down |
| ASMM9PARTA005555        |                  | 0.000531    | 0.226343039 | down |
| ASMM9PARTA019819        | RP23-122J17.9    | 0.0000021   | 0.171263082 | down |
| ASMM9PARTA002205        |                  | 0.001589582 | 0.344948354 | down |
| ASMM9PARTA007853        |                  | 0.0000013   | 0.104277896 | down |
| ASMM9PARTA046128        | BC049671         | 0.003969646 | 0.497564249 | down |
| ASMM9PARTA045134        | Gm5468           | 0.000613    | 0.492182227 | down |
| ASMM9PARTA009224        | 1700027L20Rik    | 0.000000172 | 0.114644755 | down |
| ASMM9PARTA009087        |                  | 0.000714    | 0.428043052 | down |
| ASMM9PARTA004928        |                  | 0.01257143  | 0.332508756 | down |
| ASMM9PARTA008950        |                  | 0.002600775 | 0.164237531 | down |
| ASMM9PARTA047197        | AK046721         | 0.000443    | 0.219798891 | down |
| ASMM9PARTA047197        | AK046721         | 0.000443    | 0.219798891 | down |
| ASMM9PARTA049046        | AK077353         | 0.004440847 | 0.496541514 | down |
| ASMM9PARTA049978        | Mup1             | 0.0000011   | 0.335738271 | down |
| ASMM9PARTA005801        |                  | 0.00318744  | 0.473007429 | down |
| ASMM9PARTA005801        |                  | 0.00318744  | 0.473007429 | down |
| BG808609_P1             | humanlincRNA0438 | 0.001347311 | 0.430519956 | down |
| ASMM9PARTA002368        |                  | 0.00000469  | 0.347485853 | down |
| ASMM9PARTA003797        |                  | 0.0000378   | 0.307016399 | down |
| ASMM9PARTA002621        |                  | 0.000246    | 0.086780335 | down |
| ASMM9PARTA050421        | TCR-beta chain   | 0.000818    | 0.313309965 | down |
| ASMM9PARTA050421        | TCR-beta chain   | 0.000818    | 0.313309965 | down |
| ASMM9PARTA050421        | TCR-beta chain   | 0.000818    | 0.313309965 | down |
| ASMM9PARTA050421        | TCR-beta chain   | 0.000818    | 0.313309965 | down |
| ASMM9PARTA050421        | TCR-beta chain   | 0.000818    | 0.313309965 | down |
| ASMM9PARTA050421        | TCR-beta chain   | 0.000818    | 0.313309965 | down |
| ASMM9PARTA050421        | TCR-beta chain   | 0.000818    | 0.313309965 | down |
| ASMM9PARTA050421        | TCR-beta chain   | 0.000818    | 0.313309965 | down |
| ASMM9PARTA050421        | TCR-beta chain   | 0.000818    | 0.313309965 | down |
| ASMM9PARTA001674        |                  | 0.002199233 | 0.493824405 | down |
| ASMM9PARTA007187        |                  | 0.00000796  | 0.328667569 | down |
| ASMM9PARTA047159        | AK019435         | 0.00000313  | 0.397010274 | down |
| ASMM9PARTA003905        |                  | 0.00000792  | 0.293760012 | down |
| ASMM9PARTA008035        |                  | 0.008928032 | 0.401773735 | down |
| ASMM9PARTA050559        | TCR-beta chain   | 0.000000291 | 0.19535728  | down |
| ASMM9PARTA017215        | 1500002F19Rik    | 0.0000716   | 0.288207013 | down |
| ASMM9PARTA008042        |                  | 0.034899622 | 0.404423585 | down |
| MM9LINCRNAEXON10875+_P1 |                  | 0.00000243  | 0.286688322 | down |
| ASMM9PARTA048242        | AK139359         | 0.000348    | 0.474836829 | down |
| CUST_160_PI426073487    | uc.162           | 0.00000474  | 0.22122678  | down |
| ASMM9PARTA005938        |                  | 0.00000419  | 0.499296491 | down |
| ASMM9PARTA000690        |                  | 0.000000723 | 0.335922399 | down |
| ASMM9PARTA000047        |                  | 0.000164    | 0.087415545 | down |

|                         |                  |             |             |      |
|-------------------------|------------------|-------------|-------------|------|
| ASMM9PARTA019614        | CT571259.1       | 0.003513301 | 0.488276172 | down |
| ASMM9PARTA008846        |                  | 0.001092117 | 0.232771044 | down |
| ASMM9PARTA044922        | 3110039M20Rik    | 0.0000751   | 0.433268036 | down |
| ASMM9PARTA002584        |                  | 0.000000885 | 0.012418658 | down |
| MM9LINCRNAEXON11907+_P1 | mouselincRNA0173 | 0.0000566   | 0.389431226 | down |
| ASMM9PARTA045931        | Lrch4-sap25      | 0.023233835 | 0.486565773 | down |
| ASMM9PARTA045931        | Lrch4-sap25      | 0.023233835 | 0.486565773 | down |
| ASMM9PARTA045931        | Lrch4-sap25      | 0.023233835 | 0.486565773 | down |
| ASMM9PARTA009795        | Gm13775          | 0.0000999   | 0.2427189   | down |
| ASMM9PARTA015665        | A330009N23Rik    | 0.000208    | 0.431610459 | down |
| ASMM9PARTA009187        |                  | 0.0000845   | 0.497806565 | down |
| ASMM9PARTA003810        |                  | 0.00000731  | 0.058065097 | down |
| ASMM9PARTA047791        | AK159003         | 0.00028     | 0.4993024   | down |
| ASMM9PARTA047791        | AK159003         | 0.00028     | 0.4993024   | down |
| ASMM9PARTA016031        | Gm15880          | 0.0000343   | 0.236031034 | down |
| ASMM9PARTA018831        | Gm15894          | 0.004041379 | 0.376846861 | down |
| ASMM9PARTA018831        | Gm15894          | 0.004041379 | 0.376846861 | down |
| ASMM9PARTA000149        |                  | 0.005950768 | 0.166005054 | down |
| ASMM9PARTA013178        | Gm13300          | 0.0000204   | 0.452667174 | down |
| ASMM9PARTA018948        | Gm4876           | 0.0000541   | 0.4549947   | down |
| ASMM9PARTA050392        | M34473           | 0.000000682 | 0.21291629  | down |
| ASMM9PARTA002466        |                  | 0.000156    | 0.266984107 | down |
| ASMM9PARTA004363        |                  | 0.02193925  | 0.244204776 | down |
| ASMM9PARTA010263        | Gm10805          | 0.007051962 | 0.367582813 | down |
| ASMM9PARTA014096        | Gm13016          | 0.0000971   | 0.469752032 | down |
| ASMM9PARTA007162        |                  | 0.001250507 | 0.471284139 | down |
| MM9LINCRNAEXON10517+_P1 | mouselincRNA1347 | 0.016411059 | 0.494846544 | down |
| ASMM9PARTA017777        | 2900041M22Rik    | 0.002660395 | 0.214806191 | down |
| ASMM9PARTA015093        | A530058N18Rik    | 0.00000139  | 0.30197708  | down |
| ASMM9PARTA004062        |                  | 0.00000486  | 0.043599327 | down |
| ASMM9PARTA051011        | Pgls             | 0.010097165 | 0.408227815 | down |
| ASMM9PARTA051011        | Pgls             | 0.010097165 | 0.408227815 | down |
| ASMM9PARTA048378        | AK016016         | 0.034725863 | 0.388578874 | down |
| ASMM9PARTA006892        |                  | 0.022061676 | 0.348312137 | down |
| ASMM9PARTA046477        | AK193439         | 0.000549    | 0.403561055 | down |
| ASMM9PARTA046477        | AK193439         | 0.000549    | 0.403561055 | down |
| ASMM9PARTA046477        | AK193439         | 0.000549    | 0.403561055 | down |
| ASMM9PARTA014287        | Gm10706          | 0.005554561 | 0.431426244 | down |
| ASMM9PARTA012774        | Gm15428          | 0.0000483   | 0.410379398 | down |
| ASMM9PARTA047276        | BC064072         | 0.001185206 | 0.429484322 | down |
| ASMM9PARTA011877        | Gm13626          | 0.037082683 | 0.495645801 | down |
| ASMM9PARTA000547        |                  | 0.001922868 | 0.364771639 | down |
| ASMM9PARTA051324        | AK038730         | 0.00019     | 0.476194603 | down |
| ASMM9PARTA005636        |                  | 0.0000224   | 0.409622558 | down |
| ASMM9PARTA004402        |                  | 0.000442    | 0.399451058 | down |
| ASMM9PARTA004402        |                  | 0.000442    | 0.399451058 | down |
| ASMM9PARTA004402        |                  | 0.000442    | 0.399451058 | down |
| AK007918_P1             | mouselincRNA0359 | 0.023077872 | 0.493832891 | down |
| AK007918_P1             | mouselincRNA0359 | 0.023077872 | 0.493832891 | down |



|                         |                  |             |             |      |
|-------------------------|------------------|-------------|-------------|------|
| ASMM9PARTA050068        | AK021093         | 0.000935    | 0.251328112 | down |
| ASMM9PARTA005194        |                  | 0.000572    | 0.446717981 | down |
| ASMM9PARTA014192        | 4930511A02Rik    | 0.041627042 | 0.373389013 | down |
| ASMM9PARTA047841        | AK086741         | 0.0000105   | 0.426285024 | down |
| ASMM9PARTA009136        |                  | 0.000689    | 0.100150235 | down |
| CUST_76_PI426409190     | Mup-ps11         | 0.000006    | 0.220915946 | down |
| CUST_76_PI426409190     | Mup-ps11         | 0.000006    | 0.220915946 | down |
| ASMM9PARTA017021        | Gm13003          | 0.00011     | 0.454342487 | down |
| ASMM9PARTA050468        | AK080173         | 0.019126195 | 0.388137584 | down |
| ASMM9PARTA050468        | AK080173         | 0.019126195 | 0.388137584 | down |
| ASMM9PARTA050468        | AK080173         | 0.019126195 | 0.388137584 | down |
| ASMM9PARTA051821        |                  | 0.009639057 | 0.380137554 | down |
| ASMM9PARTA045468        | 5330413P13Rik    | 0.00000834  | 0.391804085 | down |
| ASMM9PARTA003547        |                  | 0.01638323  | 0.343001694 | down |
| ASMM9PARTA012454        | Gm13230          | 0.000562    | 0.45358612  | down |
| ASMM9PARTA003479        |                  | 0.00025     | 0.084363617 | down |
| ASMM9PARTA050635        | AK030803         | 0.008517969 | 0.494003904 | down |
| MM9LINCRNAEXON11853-_P1 |                  | 0.000599    | 0.442515823 | down |
| CUST_502_PI426073487    | uc.22            | 0.000184    | 0.417572032 | down |
| ASMM9PARTA046197        | Cps1             | 0.002927542 | 0.369647818 | down |
| ASMM9PARTA003515        |                  | 0.000000148 | 0.162024915 | down |
| ASMM9PARTA003736        |                  | 0.000256    | 0.024589549 | down |
| CUST_100_PI426409190    | AC087559.13      | 0.0000025   | 0.337838637 | down |
| ASMM9PARTA048949        | AK170301         | 0.000153    | 0.053292166 | down |
| humanlincRNA0127+_P1    | humanlincRNA0127 | 0.0413916   | 0.398952606 | down |
| CUST_149_PI426073487    | uc.151           | 0.02337389  | 0.418209896 | down |
| ASMM9PARTA015150        | 2900093L17Rik    | 0.000773    | 0.348367298 | down |
| ASMM9PARTA050674        | AK020619         | 0.000122    | 0.357938375 | down |
| ASMM9PARTA013545        | 1700091E21Rik    | 0.000607    | 0.419021515 | down |
| ASMM9PARTA002350        |                  | 0.000724    | 0.45371672  | down |
| ASMM9PARTA011946        | Mup-ps10         | 0.000000949 | 0.232516233 | down |
| ASMM9PARTA019132        | 9230115E21Rik    | 0.0000229   | 0.077612894 | down |
| ASMM9PARTA051652        | AK136006         | 0.000122    | 0.263318547 | down |
| ASMM9PARTA045880        | Gm3230           | 0.006387503 | 0.475633487 | down |
| ASMM9PARTA009046        |                  | 0.002047392 | 0.485047442 | down |
| ASMM9PARTA008624        |                  | 0.0000888   | 0.286928156 | down |
| ASMM9PARTA000310        |                  | 0.002468612 | 0.140732187 | down |
| MM9LINCRNAEXON10816-_P1 |                  | 0.0000143   | 0.449514125 | down |
| ASMM9PARTA005158        |                  | 0.002328441 | 0.404611732 | down |
| ASMM9PARTA016484        | 1810019D21Rik    | 0.002046348 | 0.279333978 | down |
| ASMM9PARTA050731        | AK014683         | 0.0000291   | 0.337652323 | down |
| ASMM9PARTA016427        | Gm14285          | 0.000101    | 0.412138994 | down |
| ASMM9PARTA015880        | BB218582         | 0.011721686 | 0.301897109 | down |
| ASMM9PARTA046840        | AK179786         | 0.00148844  | 0.336422409 | down |
| ASMM9PARTA047612        | AK039634         | 1.78E-08    | 0.03853192  | down |
| ASMM9PARTA018235        | 7SK.234          | 0.000408    | 0.350196399 | down |
| ASMM9PARTA005211        |                  | 0.00000217  | 0.431717601 | down |
| ASMM9PARTA003926        |                  | 0.00000101  | 0.026465998 | down |
| ASMM9PARTA051057        | AK051019         | 0.01563291  | 0.432463682 | down |

|                      |                  |             |             |      |
|----------------------|------------------|-------------|-------------|------|
| ASMM9PARTA051057     | AK051019         | 0.01563291  | 0.432463682 | down |
| ASMM9PARTA010293     | Gm10593          | 0.0000588   | 0.448073843 | down |
| ASMM9PARTA005997     |                  | 0.0179224   | 0.389905396 | down |
| AK139572_P1          | humanlincRNA1231 | 0.002131491 | 0.430025776 | down |
| ASMM9PARTA013275     | Gm14589          | 0.017658768 | 0.492222394 | down |
| ASMM9PARTA046329     | 4930418G15Rik    | 0.000471    | 0.369242649 | down |
| ASMM9PARTA046329     | 4930418G15Rik    | 0.000471    | 0.369242649 | down |
| ASMM9PARTA017502     | 1700108N11Rik    | 0.035066187 | 0.460275317 | down |
| ASMM9PARTA017502     | 1700108N11Rik    | 0.035066187 | 0.460275317 | down |
| ASMM9PARTA003508     |                  | 0.000000532 | 0.385579333 | down |
| CUST_699_P1426073487 | uc.220           | 0.000625    | 0.286356871 | down |
| ASMM9PARTA049082     | AK085201         | 0.000313    | 0.37398748  | down |
| ASMM9PARTA011888     | Gm13408          | 0.000006    | 0.38247128  | down |
| ASMM9PARTA013819     | Gm16266          | 0.00000977  | 0.437982969 | down |
| ASMM9PARTA007842     |                  | 0.000117    | 0.499600569 | down |
| humanlincRNA1948-_P1 | humanlincRNA1948 | 0.024332624 | 0.388409639 | down |
| ASMM9PARTA013585     | Gm13935          | 0.0000375   | 0.23309342  | down |
| ASMM9PARTA051041     | Scoc             | 0.000201    | 0.111485492 | down |
| ASMM9PARTA051041     | Scoc             | 0.000201    | 0.111485492 | down |
| ASMM9PARTA007011     |                  | 0.000583    | 0.467851754 | down |
| ASMM9PARTA046156     | A730018C14Rik    | 0.04429631  | 0.410015229 | down |
| humanlincRNA1634+_P1 | humanlincRNA1634 | 0.007780833 | 0.464125748 | down |
| ASMM9PARTA010625     | Gm15087          | 0.00984336  | 0.260482737 | down |
| ASMM9PARTA002528     |                  | 0.016655196 | 0.473858326 | down |
| ASMM9PARTA009357     | H2-Ea-ps         | 0.010612574 | 0.29308705  | down |
| ASMM9PARTA004103     |                  | 0.000137    | 0.01988614  | down |
| ASMM9PARTA007499     |                  | 0.033189148 | 0.355846888 | down |
| ASMM9PARTA050300     | TCR-beta chain   | 0.00000369  | 0.222068373 | down |
| ASMM9PARTA049128     | AK043120         | 0.0000184   | 0.474642238 | down |
| humanlincRNA1154-_P1 | humanlincRNA1154 | 0.048110716 | 0.281055036 | down |
| ASMM9PARTA045668     | Hhatl            | 0.014825908 | 0.346758974 | down |
| ASMM9PARTA050891     | AK032343         | 0.001663768 | 0.330650818 | down |
| ASMM9PARTA003942     |                  | 0.000156    | 0.484500115 | down |
| ASMM9PARTA049167     | AK019067         | 0.000474    | 0.113237536 | down |
| CUST_21_P1426073487  | uc.22            | 0.016955696 | 0.372196961 | down |
| mouselincRNA1407+_P1 | mouselincRNA1407 | 0.036058847 | 0.49301421  | down |
| ASMM9PARTA016225     | 1700030C12Rik    | 0.034226015 | 0.379911164 | down |
| ASMM9PARTA010260     | Mup-ps2          | 0.0000205   | 0.190253847 | down |
| ASMM9PARTA051175     | Wdr17            | 0.004097767 | 0.414616217 | down |
| ASMM9PARTA051175     | Wdr17            | 0.004097767 | 0.414616217 | down |
| ASMM9PARTA013915     | Gm11648          | 0.0000734   | 0.347020794 | down |
| ASMM9PARTA013915     | Gm11648          | 0.0000734   | 0.347020794 | down |
| ASMM9PARTA002438     |                  | 0.001486718 | 0.236295678 | down |
| ASMM9PARTA012336     | Gm5678           | 0.00082     | 0.166052411 | down |
| ASMM9PARTA002106     |                  | 0.023237731 | 0.447618938 | down |
| ASMM9PARTA007814     |                  | 0.011178087 | 0.485568586 | down |
| ASMM9PARTA019073     | Gm15024          | 0.023464035 | 0.305623005 | down |
| ASMM9PARTA051350     | BC058420         | 0.00000943  | 0.473367291 | down |
| ASMM9PARTA003360     |                  | 0.000014    | 0.435744581 | down |

|                         |                  |             |             |      |
|-------------------------|------------------|-------------|-------------|------|
| ASMM9PARTA004121        |                  | 0.00000179  | 0.488226325 | down |
| ASMM9PARTA006718        |                  | 0.00000383  | 0.422735922 | down |
| ASMM9PARTA047471        | Tc2n             | 0.000109    | 0.204568296 | down |
| ASMM9PARTA047471        | Tc2n             | 0.000109    | 0.204568296 | down |
| ASMM9PARTA003746        |                  | 0.008565307 | 0.145315227 | down |
| ASMM9PARTA008070        |                  | 0.005794246 | 0.399759089 | down |
| ASMM9PARTA045912        |                  | 0.00111956  | 0.123764107 | down |
| ASMM9PARTA047208        | AK217959         | 0.00012     | 0.2360307   | down |
| ASMM9PARTA013610        | A430104N18Rik    | 0.002459263 | 0.417326738 | down |
| ASMM9PARTA005442        |                  | 0.000000642 | 0.09485516  | down |
| ASMM9PARTA048270        | AK213404         | 0.030380491 | 0.317101339 | down |
| ASMM9PARTA006348        |                  | 0.017603844 | 0.363070844 | down |
| MM9LINCRNAEXON11498+_P1 | mouselincRNA0517 | 0.01326116  | 0.3968863   | down |
| ASMM9PARTA016121        | AI115009         | 0.015477298 | 0.357065833 | down |
| ASMM9PARTA006074        |                  | 0.000473    | 0.236903501 | down |
| ASMM9PARTA048254        | AK151508         | 0.0000262   | 0.390559398 | down |
| ASMM9PARTA008059        |                  | 0.0000579   | 0.373799636 | down |
| ASMM9PARTA045219        | B130006D01Rik    | 0.00000118  | 0.118278317 | down |
| ASMM9PARTA004494        |                  | 0.009845706 | 0.48784224  | down |
| ASMM9PARTA008863        |                  | 0.000246    | 0.337201757 | down |
| ASMM9PARTA003400        |                  | 0.000369    | 0.429839473 | down |
| ASMM9PARTA011822        | Gm13312          | 0.00059     | 0.463913169 | down |
| CUST_836_PI426073487    | uc.357           | 0.010633458 | 0.389478351 | down |
| ASMM9PARTA047055        | AK043502         | 0.000128    | 0.365846342 | down |
| ASMM9PARTA002513        |                  | 0.000335    | 0.322723914 | down |
| ASMM9PARTA049433        | AK144823         | 0.00014     | 0.464487903 | down |
| MM9LINCRNAEXON10944-_P1 | mouselincRNA0866 | 0.010125405 | 0.302818596 | down |
| ASMM9PARTA014930        | Gm13383          | 0.000737    | 0.472894402 | down |
| ASMM9PARTA005745        |                  | 0.0000263   | 0.455922922 | down |
| BB202824_P1             | mouselincRNA0958 | 0.0000508   | 0.140062594 | down |
| ASMM9PARTA006336        |                  | 0.005042215 | 0.265836194 | down |
| ASMM9PARTA005733        |                  | 0.00000262  | 0.248457452 | down |
| ASMM9PARTA009012        |                  | 0.00000209  | 0.492830208 | down |
| ASMM9PARTA015935        | Gm16701          | 0.001799597 | 0.451019507 | down |
| ASMM9PARTA000027        |                  | 0.001059296 | 0.139040803 | down |
| ASMM9PARTA004550        |                  | 0.00405342  | 0.387664335 | down |
| ASMM9PARTA004550        |                  | 0.00405342  | 0.387664335 | down |
| ASMM9PARTA006146        |                  | 0.003528568 | 0.453201506 | down |
| ASMM9PARTA006146        |                  | 0.003528568 | 0.453201506 | down |
| ASMM9PARTA006146        |                  | 0.003528568 | 0.453201506 | down |
| ASMM9PARTA044993        | A230056P14Rik    | 0.026065445 | 0.285091971 | down |
| ASMM9PARTA044993        | A230056P14Rik    | 0.026065445 | 0.285091971 | down |
| ASMM9PARTA002403        |                  | 0.024782956 | 0.434475548 | down |
| ASMM9PARTA050312        | AK006413         | 0.041590855 | 0.379883093 | down |
| MM9LINCRNAEXON11005+_P1 | mouselincRNA0885 | 0.001336427 | 0.332339373 | down |
| ASMM9PARTA016561        | Gm13589          | 0.001552763 | 0.475488971 | down |
| BU698035_P1             | mouselincRNA1195 | 0.01063636  | 0.375872122 | down |
| ASMM9PARTA014079        | Gm13781          | 0.042472877 | 0.414111993 | down |
| AK156563_P1             | humanlincRNA1111 | 0.000132    | 0.444859845 | down |

|                         |                  |             |             |      |
|-------------------------|------------------|-------------|-------------|------|
| AK156563_P1             | humanlincRNA1111 | 0.000132    | 0.444859845 | down |
| AK156563_P1             | humanlincRNA1111 | 0.000132    | 0.444859845 | down |
| ASMM9PARTA045066        | Dlx6os1          | 0.00016     | 0.164637683 | down |
| ASMM9PARTA016030        | Gm13601          | 0.000983    | 0.454961931 | down |
| ASMM9PARTA016030        | Gm13601          | 0.000983    | 0.454961931 | down |
| ASMM9PARTA050154        | Tcrb             | 0.0000471   | 0.192232995 | down |
| ASMM9PARTA003483        |                  | 0.000000154 | 0.257359133 | down |
| ASMM9PARTA008823        |                  | 0.007360342 | 0.475785832 | down |
| ASMM9PARTA002388        |                  | 0.008766177 | 0.340258999 | down |
| ASMM9PARTA007439        |                  | 0.002319333 | 0.323349811 | down |
| ASMM9PARTA050813        | AK046042         | 0.0000683   | 0.390996982 | down |
| ASMM9PARTA050813        | AK046042         | 0.0000683   | 0.390996982 | down |
| ASMM9PARTA048261        | AK018990         | 0.03202989  | 0.496868906 | down |
| ASMM9PARTA002960        |                  | 0.012800043 | 0.281409825 | down |
| ASMM9PARTA018669        | RP24-468F14.2    | 0.000136    | 0.487900626 | down |
| ASMM9PARTA045109        | 9130024F11Rik    | 0.00000407  | 0.307762951 | down |
| ASMM9PARTA019857        |                  | 0.000000857 | 0.068963708 | down |
| ASMM9PARTA050429        | AK190196         | 0.0000477   | 0.413691792 | down |
| ASMM9PARTA050429        | AK190196         | 0.0000477   | 0.413691792 | down |
| ASMM9PARTA050429        | AK190196         | 0.0000477   | 0.413691792 | down |
| MM9LINCRNAEXON10279-_P1 | mouselincRNA1497 | 0.00000146  | 0.068619801 | down |
| ASMM9PARTA008115        |                  | 0.00000509  | 0.441309694 | down |
| MM9LINCRNAEXON11963+_P1 |                  | 0.0018236   | 0.383460358 | down |
| ASMM9PARTA018350        | A530040E14Rik    | 0.000228    | 0.200950052 | down |
| ASMM9PARTA048519        | AK020087         | 0.00000413  | 0.398156694 | down |
| ASMM9PARTA047122        | AK053157         | 0.000234    | 0.318997144 | down |
| ASMM9PARTA049957        | AK037159         | 0.024685148 | 0.443568328 | down |
| ASMM9PARTA049957        | AK037159         | 0.024685148 | 0.443568328 | down |
| AK132675_P1             | humanlincRNA1194 | 0.000828    | 0.489370146 | down |
| ASMM9PARTA010261        | Gm10601          | 0.0000747   | 0.438413242 | down |
| ASMM9PARTA014711        | Fam150a          | 0.0000946   | 0.339497649 | down |
| ASMM9PARTA019172        | RP24-486L9.1     | 0.0000255   | 0.238654793 | down |
| ASMM9PARTA019172        | RP24-486L9.1     | 0.0000255   | 0.238654793 | down |
| ASMM9PARTA000903        |                  | 0.027537983 | 0.395299978 | down |
| ASMM9PARTA007772        |                  | 0.021485496 | 0.404072371 | down |
| ASMM9PARTA046203        | AK138346         | 0.000105    | 0.410905194 | down |
| ASMM9PARTA015743        | Gm16885          | 0.005962122 | 0.34962524  | down |
| ASMM9PARTA015743        | Gm16885          | 0.005962122 | 0.34962524  | down |
| ASMM9PARTA005348        |                  | 0.000142    | 0.297042379 | down |
| ASMM9PARTA015727        | Gm13919          | 0.026349675 | 0.386608291 | down |
| ASMM9PARTA000988        |                  | 0.01956945  | 0.407450227 | down |
| ASMM9PARTA006626        |                  | 0.0000373   | 0.306111173 | down |
| ASMM9PARTA050618        | AK007376         | 0.00576279  | 0.340373784 | down |
| ASMM9PARTA051621        | AK052495         | 0.0000258   | 0.417948305 | down |
| ASMM9PARTA049986        | DQ266428         | 0.028635023 | 0.454645518 | down |
| ASMM9PARTA009936        | Mup-ps7          | 0.0000304   | 0.202290699 | down |
| ASMM9PARTA046304        | AK163333         | 0.03011973  | 0.328204643 | down |
| ASMM9PARTA046304        | AK163333         | 0.03011973  | 0.328204643 | down |
| ASMM9PARTA046304        | AK163333         | 0.03011973  | 0.328204643 | down |

|                      |                  |             |             |      |
|----------------------|------------------|-------------|-------------|------|
| ASMM9PARTA047796     | AK043267         | 0.001465006 | 0.359384389 | down |
| ASMM9PARTA047796     | AK043267         | 0.001465006 | 0.359384389 | down |
| ASMM9PARTA012215     | Mup-ps19         | 0.0000359   | 0.128890091 | down |
| ASMM9PARTA050847     | Tgfa             | 0.00000688  | 0.49883828  | down |
| ASMM9PARTA049404     | Myef2            | 0.0000185   | 0.411291633 | down |
| ASMM9PARTA049404     | Myef2            | 0.0000185   | 0.411291633 | down |
| ASMM9PARTA049404     | Myef2            | 0.0000185   | 0.411291633 | down |
| ASMM9PARTA049404     | Myef2            | 0.0000185   | 0.411291633 | down |
| ASMM9PARTA000029     |                  | 0.000856    | 0.107190591 | down |
| ASMM9PARTA049257     | AK139461         | 0.000188    | 0.278126262 | down |
| ASMM9PARTA047918     | AK014089         | 0.000124    | 0.44583559  | down |
| ASMM9PARTA004228     |                  | 0.004064383 | 0.277565949 | down |
| ASMM9PARTA010235     | Gm13300          | 0.0000149   | 0.310438812 | down |
| CUST_103_P1426409190 | AC087559.5       | 0.0000416   | 0.400792848 | down |
| ASMM9PARTA019341     | RP23-143B14.2    | 0.000709    | 0.433330837 | down |
| ASMM9PARTA004298     |                  | 0.00000428  | 0.222821895 | down |
| CUST_301_P1426073487 | uc.303           | 0.000622    | 0.375254136 | down |
| ASMM9PARTA012583     | Gm15368          | 0.034053914 | 0.438150231 | down |
| ASMM9PARTA012583     | Gm15368          | 0.034053914 | 0.438150231 | down |
| ASMM9PARTA012583     | Gm15368          | 0.034053914 | 0.438150231 | down |
| ASMM9PARTA012583     | Gm15368          | 0.034053914 | 0.438150231 | down |
| ASMM9PARTA012583     | Gm15368          | 0.034053914 | 0.438150231 | down |
| ASMM9PARTA012583     | Gm15368          | 0.034053914 | 0.438150231 | down |
| ASMM9PARTA012583     | Gm15368          | 0.034053914 | 0.438150231 | down |
| ASMM9PARTA009161     |                  | 0.000309    | 0.269478927 | down |
| ASMM9PARTA006315     |                  | 0.027379101 | 0.435897654 | down |
| ASMM9PARTA011545     | H2-M6-ps         | 0.000312    | 0.489450865 | down |
| ASMM9PARTA009180     |                  | 0.0000504   | 0.355306708 | down |
| ASMM9PARTA002933     |                  | 0.029462766 | 0.480671571 | down |
| ASMM9PARTA006662     |                  | 0.00000565  | 0.207552245 | down |
| ASMM9PARTA016242     | 4933400F03Rik    | 0.00023     | 0.438004378 | down |
| ASMM9PARTA015861     | D430036J16Rik    | 0.0000789   | 0.427207203 | down |
| ASMM9PARTA044847     | Six3os1          | 0.023333002 | 0.483660918 | down |
| ASMM9PARTA050208     | AK017143         | 0.002412934 | 0.417674655 | down |
| ASMM9PARTA003967     |                  | 0.000303    | 0.365362602 | down |
| ASMM9PARTA048273     | AK038079         | 0.0000382   | 0.437496514 | down |
| ASMM9PARTA050389     | Tcrb             | 0.00000049  | 0.203147321 | down |
| ASMM9PARTA013859     | B130046B21Rik    | 0.0000039   | 0.322692026 | down |
| ASMM9PARTA013859     | B130046B21Rik    | 0.0000039   | 0.322692026 | down |
| ASMM9PARTA011720     | Gm13627          | 0.000801    | 0.402114705 | down |
| ASMM9PARTA006007     |                  | 0.023450429 | 0.447348852 | down |
| ASMM9PARTA002209     |                  | 0.0000367   | 0.483487804 | down |
| ASMM9PARTA018824     | AC107837.1       | 0.001857252 | 0.496943499 | down |
| ASMM9PARTA018824     | AC107837.1       | 0.001857252 | 0.496943499 | down |
| BE949468_P1          | mouselincRNA1019 | 0.002107645 | 0.421922698 | down |
| ASMM9PARTA046906     | AK007042         | 0.011831683 | 0.30875551  | down |
| ASMM9PARTA003111     |                  | 0.0000783   | 0.343982315 | down |
| ASMM9PARTA009352     |                  | 0.00258156  | 0.185635351 | down |
| ASMM9PARTA019428     | Gm10497          | 0.037693787 | 0.336343179 | down |
| ASMM9PARTA019428     | Gm10497          | 0.037693787 | 0.336343179 | down |

|                         |                  |             |             |      |
|-------------------------|------------------|-------------|-------------|------|
| ASMM9PARTA019428        | Gm10497          | 0.037693787 | 0.336343179 | down |
| ASMM9PARTA007267        |                  | 0.000167    | 0.491495168 | down |
| ASMM9PARTA014317        | Gm14120          | 0.002399707 | 0.349891175 | down |
| ASMM9PARTA000507        |                  | 0.0000069   | 0.466609516 | down |
| ASMM9PARTA050514        | AK039340         | 0.001683929 | 0.323640034 | down |
| ASMM9PARTA000022        |                  | 0.000296    | 0.487496851 | down |
| ASMM9PARTA003178        |                  | 0.001544726 | 0.445258773 | down |
| CA874578_P1             | mouselincRNA0103 | 0.017573824 | 0.37807991  | down |
| ASMM9PARTA005659        |                  | 0.001280571 | 0.395075573 | down |
| MM9LINCRNAEXON11972+_P1 |                  | 0.0000152   | 0.475855383 | down |
| ASMM9PARTA015997        | Gm15631          | 0.00000258  | 0.497967496 | down |
| ASMM9PARTA015997        | Gm15631          | 0.00000258  | 0.497967496 | down |
| ASMM9PARTA016971        | Gm15535          | 0.0001      | 0.366023904 | down |
| ASMM9PARTA046137        | AK144829         | 0.005679592 | 0.462896422 | down |
| ASMM9PARTA015931        | Mup-ps2          | 0.0000354   | 0.337265319 | down |
| ASMM9PARTA051808        |                  | 0.000275    | 0.130511916 | down |
| ASMM9PARTA050787        | AK008222         | 0.013717309 | 0.435639265 | down |
| ASMM9PARTA047889        | AK136126         | 0.001251614 | 0.472807203 | down |
| ASMM9PARTA006222        |                  | 0.000626    | 0.350324663 | down |
| ASMM9PARTA006222        |                  | 0.000626    | 0.350324663 | down |
| ASMM9PARTA006222        |                  | 0.000626    | 0.350324663 | down |
| ASMM9PARTA006222        |                  | 0.000626    | 0.350324663 | down |
| ASMM9PARTA008425        |                  | 0.000306    | 0.351188617 | down |
| ASMM9PARTA007151        |                  | 0.003838007 | 0.472875171 | down |
| ASMM9PARTA016218        | Gm12371          | 0.000317    | 0.47506428  | down |
| ASMM9PARTA019274        | AC157896.1       | 0.0000114   | 0.345717092 | down |
| ASMM9PARTA049345        | AK142074         | 0.00000604  | 0.165453547 | down |
| ASMM9PARTA049168        | Ccdc34           | 0.0000464   | 0.348566308 | down |
| ASMM9PARTA005438        |                  | 0.001121801 | 0.458839925 | down |
| ASMM9PARTA051397        | AK018937         | 0.00064     | 0.459391239 | down |
| ASMM9PARTA051397        | AK018937         | 0.00064     | 0.459391239 | down |
| ASMM9PARTA051397        | AK018937         | 0.00064     | 0.459391239 | down |
| ASMM9PARTA050630        | AK131825         | 0.0000933   | 0.431225895 | down |
| ASMM9PARTA006619        |                  | 0.000012    | 0.479263629 | down |
| ASMM9PARTA019679        | Gm3892           | 0.00000184  | 0.29196579  | down |
| ASMM9PARTA046463        | AK144329         | 0.000254    | 0.278920959 | down |
| ASMM9PARTA005334        |                  | 0.00000147  | 0.322905843 | down |
| ASMM9PARTA004045        |                  | 0.0000129   | 0.421610471 | down |
| ASMM9PARTA005379        |                  | 0.004583365 | 0.477264321 | down |
| ASMM9PARTA017530        | Gm16129          | 0.002364924 | 0.39793578  | down |
| ASMM9PARTA017530        | Gm16129          | 0.002364924 | 0.39793578  | down |
| ASMM9PARTA017530        | Gm16129          | 0.002364924 | 0.39793578  | down |
| ASMM9PARTA003790        |                  | 0.0000859   | 0.405758772 | down |
| BG794789_P1             | humanlincRNA1357 | 0.000205    | 0.439104099 | down |
| ASMM9PARTA017182        | Gm14820          | 0.047283363 | 0.387430244 | down |
