# Supplementary material for: Microarray Profile of Long Noncoding RNA and Messenger RNA Expression in a Model of Alzheimer’s Disease
Source: MDPI journal article supplement (doi:10.3390/life10050064), 2020-05-14
Supplement: s1 [file s1]

# Supplementary

## Microarray Profile of Long Noncoding RNA and Messenger RNA Expression in a Model of Alzheimer's Disease

Linlin Wang <sup>†</sup>, Li Zeng <sup>†</sup>, Hailun Jiang, Zhuorong Li <sup>\*</sup> and Rui Liu <sup>\*</sup>

Institute of Medicinal Biotechnology, Chinese Academy of Medical Sciences and Peking Union Medical College, Beijing 100050, China; wanglinlin@wfmcc.edu.cn (L.W.); zengsheng@imb.pumc.edu.cn (L.Z.); jianghailun@imb.pumc.edu.cn (H.J.)

<sup>\*</sup> Correspondence: lizhuorong@imb.pumc.edu.cn (Z.L.); +86-10-8352017; .liurui@imb.pumc.edu.cn (R.L.); Tel.: +86-10-67087731

**Table S9.** Top 10 aberrantly expressed lncRNAs in 1-month-old, 3-month-old, 6-month-old, and 9-month-old APP/PS1 mice as compared to age-matched WT control mice.

|                                                     | lncRNA Name      | p-Value     | Fold-Change | Regulation |
|-----------------------------------------------------|------------------|-------------|-------------|------------|
| 1-month-old APP/PS1 mice versus age-matched WT mice | mouse.lncRNA0297 | 0.03853617  | 2.4391737   | up         |
|                                                     | AL732590.2       | 0.002783807 | 2.15185     | up         |
|                                                     | A230108P19Rik    | 0.001155623 | 2.6593003   | up         |
|                                                     | mouse.lncRNA0294 | 0.024343088 | 2.5895295   | up         |
|                                                     | mouse.lncRNA0737 | 0.001355704 | 3.430497    | up         |
|                                                     | human.lncRNA1590 | 0.0000437   | 5.9778385   | up         |
|                                                     | NRON.1           | 0.003656608 | 3.9517019   | up         |
|                                                     | human.lncRNA2213 | 0.017903363 | 2.0292795   | up         |
|                                                     | mouse.lncRNA0380 | 0.001012912 | 2.3298893   | up         |
|                                                     | Gm16706          | 0.003379951 | 3.3808007   | up         |
|                                                     | AK039487         | 0.001401456 | 0.362343036 | down       |
|                                                     | Mogat1           | 0.007517785 | 0.404617429 | down       |
|                                                     | D230002A01Rik    | 0.005323117 | 0.342491804 | down       |
|                                                     | 4933436C20Rik    | 0.000151    | 0.413698244 | down       |
|                                                     | Gm4759           | 0.027513668 | 0.462699567 | down       |
|                                                     | AK015813         | 0.00000139  | 0.451870259 | down       |
|                                                     | A530058N18Rik    | 0.000441    | 0.427147769 | down       |
|                                                     | AK017111         | 0.000132    | 0.337344016 | down       |
|                                                     | AK018924         | 0.030719675 | 0.416587029 | down       |
|                                                     | AK050516         | 0.0000168   | 0.490624124 | down       |
| 3-month-old APP/PS1 mice versus age-matched WT mice | BC075635         | 0.035933297 | 2.031355    | up         |
|                                                     | 4933434I20Rik    | 0.009978537 | 2.0194137   | up         |
|                                                     | human.lncRNA1040 | 0.040220477 | 2.0302415   | up         |
|                                                     | mouse.lncRNA1286 | 0.002579583 | 2.456823    | up         |
|                                                     | Gm12940          | 0.0000735   | 3.5512953   | up         |
|                                                     | mouse.lncRNA0294 | 0.018257162 | 2.6640735   | up         |
|                                                     | human.lncRNA1590 | 0.0000642   | 4.6550817   | up         |
|                                                     | AK039862         | 0.000282    | 10.566481   | up         |
|                                                     | 4632427E13Rik    | 0.003185133 | 2.1290658   | up         |

|                                                     |                  |             |             |      |
|-----------------------------------------------------|------------------|-------------|-------------|------|
|                                                     | Gm16706          | 0.028662696 | 2.2541282   | up   |
|                                                     | AK039125         | 0.04244341  | 0.412248327 | down |
|                                                     | humanlincRNA0676 | 0.01711409  | 0.495437516 | down |
|                                                     | mouselincRNA1108 | 0.024073955 | 0.389109585 | down |
|                                                     | mouselincRNA1426 | 0.000292    | 0.288348306 | down |
|                                                     | mouselincRNA1009 | 0.031525224 | 0.468723422 | down |
|                                                     | AK032255         | 0.007611876 | 0.339942518 | down |
|                                                     | 2410057H14Rik    | 0.006866116 | 0.499634767 | down |
|                                                     | 4930448N21Rik    | 0.002114768 | 0.425981788 | down |
|                                                     | BC079904         | 0.02010789  | 0.43873808  | down |
|                                                     | mouselincRNA0637 | 0.014044236 | 0.456293078 | down |
| 6-month-old APP/PS1 mice versus age-matched WT mice | Abhd1            | 0.000000243 | 3.1196003   | up   |
|                                                     | mouselincRNA1286 | 0.003538504 | 2.2654934   | up   |
|                                                     | mouselincRNA1524 | 0.006277942 | 2.1662855   | up   |
|                                                     | 4933436C20Rik    | 0.000129    | 2.420025    | up   |
|                                                     | A230108P19Rik    | 0.021290345 | 2.4069388   | up   |
|                                                     | mouselincRNA0737 | 0.004286149 | 2.6884916   | up   |
|                                                     | Gm11019          | 0.025719354 | 2.0346353   | up   |
|                                                     | humanlincRNA1590 | 0.023626897 | 3.5407078   | up   |
|                                                     | 4732418A04Rik    | 0.000194    | 4.9253507   | up   |
|                                                     | AK039862         | 0.001835104 | 4.3281155   | up   |
|                                                     | Gm10497          | 0.000034    | 0.399063366 | down |
|                                                     | Gm10497          | 0.000034    | 0.399063366 | down |
|                                                     | Gm10497          | 0.000034    | 0.399063366 | down |
|                                                     | AK042016         | 0.000569    | 0.43446526  | down |
|                                                     | TCR-beta chain   | 0.00000429  | 0.292112979 | down |
|                                                     | AK017111         | 0.000589    | 0.281338745 | down |
|                                                     | AK039014         | 0.025748411 | 0.39605576  | down |
|                                                     | Gm12092          | 0.009861143 | 0.450306819 | down |
|                                                     | uc.197           | 0.000323    | 0.435374605 | down |
|                                                     | 3110099E03Rik    | 0.002467179 | 0.226432662 | down |
| 9-month-old APP/PS1 mice versus age-matched WT mice | Gm16834          | 0.0000174   | 2.4332428   | up   |
|                                                     | Gm16836          | 0.0000959   | 2.4933932   | up   |
|                                                     | mouselincRNA1286 | 0.003183203 | 2.4396448   | up   |
|                                                     | Gm14158          | 0.000285    | 2.3584278   | up   |
|                                                     | mouselincRNA1524 | 0.00046     | 2.0816717   | up   |
|                                                     | Gm15086          | 0.020345824 | 2.7550943   | up   |
|                                                     | Gm12940          | 0.000724    | 2.2870247   | up   |
|                                                     | mouselincRNA0155 | 0.040218018 | 2.235328    | up   |
|                                                     | mouselincRNA0737 | 0.018313346 | 2.563409    | up   |
|                                                     | AK144771         | 0.000183    | 2.120443    | up   |
|                                                     | Gm4759           | 0.011067896 | 0.275980455 | down |
|                                                     | mouselincRNA0004 | 0.000337    | 0.449832802 | down |
|                                                     | Gm16206          | 0.017974988 | 0.383945252 | down |
|                                                     | F630042J09Rik    | 0.02230519  | 0.484179156 | down |
|                                                     | humanlincRNA2085 | 0.00000106  | 0.345139247 | down |
|                                                     | mouselincRNA1108 | 0.013267624 | 0.342984529 | down |
|                                                     | Gm11508          | 0.00000196  | 0.251871925 | down |
|                                                     | AK017111         | 0.0000171   | 0.240110278 | down |
|                                                     | AK039014         | 0.017692    | 0.436916719 | down |
|                                                     | D12Ert551e       | 0.00432953  | 0.488454045 | down |
