# Supplementary material for: Microarray Profile of Long Noncoding RNA and Messenger RNA Expression in a Model of Alzheimer’s Disease
Source: MDPI journal article supplement (doi:10.3390/life10050064), 2020-05-14
Supplement: s1 [file s1]

# Supplementary

## Microarray Profile of Long Noncoding RNA and Messenger RNA Expression in a Model of Alzheimer's Disease

Linlin Wang <sup>†</sup>, Li Zeng <sup>†</sup>, Hailun Jiang, Zhuorong Li <sup>\*</sup> and Rui Liu <sup>\*</sup>

Institute of Medicinal Biotechnology, Chinese Academy of Medical Sciences and Peking Union Medical College, Beijing 100050, China; wanglinlin@wfmc.edu.cn (L.W.); zengsheng@imb.pumc.edu.cn (L.Z.); jianghailun@imb.pumc.edu.cn (H.J.)

<sup>\*</sup> Correspondence: lizhourong@imb.pumc.edu.cn (Z.L.); +86-10-8352017; .liurui@imb.pumc.edu.cn (R.L.); Tel.: +86-10-67087731

**Table S4.** Differently expressed lncRNAs in the brain of 9-month-old.APP/PS1 mice compared with age-matched WT mice.

| Probe Name              | Gene Symbol      | <i>p</i> -Value | Fold Change | Regulation |
|-------------------------|------------------|-----------------|-------------|------------|
| ASMM9PARTA014130        | Gm16834          | 0.0000174       | 2.4332428   | up         |
| ASMM9PARTA006853        |                  | 0.0000576       | 89.55974    | up         |
| ASMM9PARTA016470        | Gm16836          | 0.0000959       | 2.4933932   | up         |
| MM9LINCRNAEXON10451+_P1 | mouselincRNA1286 | 0.003183203     | 2.4396448   | up         |
| ASMM9PARTA010954        | Gm14158          | 0.000285        | 2.3584278   | up         |
| MM9LINCRNAEXON10103-_P1 | mouselincRNA1524 | 0.00046         | 2.0816717   | up         |
| ASMM9PARTA012889        | Gm12983          | 0.0000247       | 2.3748605   | up         |
| ASMM9PARTA015833        | Gm15086          | 0.020345824     | 2.7550943   | up         |
| MM9LINCRNAEXON10482-_P1 |                  | 0.005871455     | 2.0287292   | up         |
| ASMM9PARTA014628        | Gm12940          | 0.000724        | 2.2870247   | up         |
| mouselincRNA0155+_P1    | mouselincRNA0155 | 0.040218018     | 2.235328    | up         |
| ASMM9PARTA000080        |                  | 0.000669        | 2.143498    | up         |
| ASMM9PARTA009048        |                  | 0.004307814     | 2.6057537   | up         |
| MM9LINCRNAEXON11250-_P1 | mouselincRNA0737 | 0.018313346     | 2.563409    | up         |
| ASMM9PARTA051822        |                  | 0.000399        | 2.1336646   | up         |
| ASMM9PARTA046301        | AK144771         | 0.000183        | 2.120443    | up         |
| ASMM9PARTA004288        |                  | 0.000105        | 2.3698492   | up         |
| humanlincRNA1590+_P1    | humanlincRNA1590 | 0.007291022     | 2.2136614   | up         |
| ASMM9PARTA046759        | AK039862         | 0.000135        | 19.392376   | up         |
| ASMM9PARTA016398        | 4632427E13Rik    | 0.000518        | 2.4383655   | up         |
| ASMM9PARTA018203        | NRON.1           | 0.000195        | 2.4120655   | up         |
| ASMM9PARTA006958        |                  | 0.000435        | 3.0653234   | up         |
| ASMM9PARTA016545        | Gm16706          | 0.016001754     | 3.0476017   | up         |
| ASMM9PARTA016545        | Gm16706          | 0.016001754     | 3.0476017   | up         |
| ASMM9PARTA012922        | Gm13153          | 0.0000147       | 2.4737248   | up         |

|                      |                  |             |           |    |
|----------------------|------------------|-------------|-----------|----|
| ASMM9PARTA012922     | Gm13153          | 0.0000147   | 2.4737248 | up |
| ASMM9PARTA012922     | Gm13153          | 0.0000147   | 2.4737248 | up |
| ASMM9PARTA015256     | 9130017K11Rik    | 0.0000641   | 3.2698576 | up |
| ASMM9PARTA015256     | 9130017K11Rik    | 0.0000641   | 3.2698576 | up |
| ASMM9PARTA050547     | BC049735         | 0.019010011 | 2.0642784 | up |
| ASMM9PARTA018387     | Gm16184          | 0.000389    | 2.5548847 | up |
| ASMM9PARTA050284     | Gak              | 0.0000833   | 2.7930596 | up |
| ASMM9PARTA046970     | BC006965         | 0.000548    | 4.090801  | up |
| ASMM9PARTA011525     | Gm13314          | 0.000141    | 2.3245313 | up |
| CA465684_P1          | mouselincRNA0967 | 0.02853576  | 2.0828776 | up |
| ASMM9PARTA013323     | Mup-ps15         | 0.0000818   | 6.33789   | up |
| ASMM9PARTA011112     | Gm13469          | 0.000409    | 2.0476577 | up |
| ASMM9PARTA016364     | Gm15843          | 0.00000489  | 2.5534022 | up |
| ASMM9PARTA014585     | Gm8093           | 0.021374123 | 2.221592  | up |
| ASMM9PARTA004295     |                  | 0.004375473 | 2.6300242 | up |
| ASMM9PARTA009250     |                  | 0.0000565   | 2.7566524 | up |
| ASMM9PARTA011368     | Gm5759           | 0.000534    | 2.4414752 | up |
| ASMM9PARTA002301     |                  | 0.000698    | 2.3251016 | up |
| CJ058094_P1          | mouselincRNA1482 | 0.0000258   | 6.6150665 | up |
| CJ058094_P1          | mouselincRNA1482 | 0.0000258   | 6.6150665 | up |
| CJ058094_P1          | mouselincRNA1482 | 0.0000258   | 6.6150665 | up |
| ASMM9PARTA012572     | Gm13323          | 0.001656133 | 2.1485894 | up |
| ASMM9PARTA012883     | Gm12706          | 0.000126    | 2.5805876 | up |
| ASMM9PARTA014191     | Gm12092          | 0.000209    | 3.625209  | up |
| ASMM9PARTA049442     | LOC100043381     | 0.0000269   | 2.831089  | up |
| ASMM9PARTA049442     | LOC100043381     | 0.0000269   | 2.831089  | up |
| ASMM9PARTA049442     | LOC100043381     | 0.0000269   | 2.831089  | up |
| ASMM9PARTA049442     | LOC100043381     | 0.0000269   | 2.831089  | up |
| ASMM9PARTA049442     | LOC100043381     | 0.0000269   | 2.831089  | up |
| ASMM9PARTA049442     | LOC100043381     | 0.0000269   | 2.831089  | up |
| ASMM9PARTA049442     | LOC100043381     | 0.0000269   | 2.831089  | up |
| ASMM9PARTA049442     | LOC100043381     | 0.0000269   | 2.831089  | up |
| ASMM9PARTA003398     |                  | 0.001134059 | 3.3080199 | up |
| ASMM9PARTA012940     | Gm14324          | 0.00076     | 2.632217  | up |
| ASMM9PARTA051273     | BC039997         | 0.0000479   | 4.436292  | up |
| ASMM9PARTA013248     | Gm12924          | 0.00821248  | 2.148568  | up |
| ASMM9PARTA013248     | Gm12924          | 0.00821248  | 2.148568  | up |
| ASMM9PARTA049385     | AK137033         | 0.001777993 | 2.2938242 | up |
| ASMM9PARTA013083     | Gm12539          | 0.00000589  | 2.224736  | up |
| CUST_282_PI426073487 | uc.284           | 0.004038211 | 3.4073362 | up |
| ASMM9PARTA009863     | Gm7731           | 0.000881    | 2.2065191 | up |
| ASMM9PARTA013061     | Gm13913          | 0.0000648   | 5.3009806 | up |
| ASMM9PARTA000138     |                  | 0.018494261 | 2.188609  | up |
| ASMM9PARTA049079     | AK047177         | 0.035374727 | 2.8497887 | up |
| ASMM9PARTA049464     | AK052881         | 0.006231084 | 4.531504  | up |
| ASMM9PARTA049464     | AK052881         | 0.006231084 | 4.531504  | up |
| ASMM9PARTA017430     | A830052D11Rik    | 0.00000708  | 3.8275795 | up |
| ASMM9PARTA017430     | A830052D11Rik    | 0.00000708  | 3.8275795 | up |
| ASMM9PARTA008375     |                  | 0.005777075 | 3.8994133 | up |

|                         |                  |             |           |    |
|-------------------------|------------------|-------------|-----------|----|
| ASMM9PARTA004844        |                  | 0.016606377 | 2.0014207 | up |
| ASMM9PARTA016228        | Gm16093          | 0.0000913   | 2.3423448 | up |
| ASMM9PARTA016228        | Gm16093          | 0.0000913   | 2.3423448 | up |
| ASMM9PARTA048616        | AK020462         | 0.014852415 | 2.2346213 | up |
| BY732216_P1             | humanlincRNA0653 | 0.00000154  | 2.0202749 | up |
| ASMM9PARTA007917        |                  | 0.012555691 | 2.033057  | up |
| ASMM9PARTA000849        |                  | 0.034926616 | 4.464988  | up |
| ASMM9PARTA009659        | Gm7666           | 0.000476    | 2.033739  | up |
| ASMM9PARTA005541        |                  | 0.013500612 | 3.8303263 | up |
| ASMM9PARTA016047        | G630018N14Rik    | 0.00683265  | 2.0304508 | up |
| ASMM9PARTA051010        | AK170106         | 0.000244    | 3.4403698 | up |
| ASMM9PARTA010969        | Gm15399          | 0.00526151  | 2.1195905 | up |
| ASMM9PARTA012807        | Gm14633          | 0.000256    | 2.3599093 | up |
| ASMM9PARTA005182        |                  | 0.0000912   | 25.348322 | up |
| MM9LINCRNAEXON11747+_P1 | mouselincRNA0230 | 0.009304563 | 2.0012047 | up |
| ASMM9PARTA011323        | Gm12677          | 0.00000648  | 3.3582802 | up |
| ASMM9PARTA014414        | 5430427M07Rik    | 0.019764079 | 2.8032463 | up |
| ASMM9PARTA051477        | AK028224         | 0.000000549 | 3.2538602 | up |
| humanlincRNA0255+_P1    | humanlincRNA0255 | 0.01382096  | 2.0040312 | up |
| ASMM9PARTA007950        |                  | 0.042229388 | 2.3446157 | up |
| ASMM9PARTA050830        | AK081140         | 0.00000156  | 3.4868026 | up |
| ASMM9PARTA050830        | AK081140         | 0.00000156  | 3.4868026 | up |
| ASMM9PARTA050830        | AK081140         | 0.00000156  | 3.4868026 | up |
| humanlincRNA1422+_P1    | humanlincRNA1422 | 0.009498736 | 2.1592977 | up |
| ASMM9PARTA047940        | AK014435         | 0.000289    | 6.456377  | up |
| ASMM9PARTA003773        |                  | 0.00000327  | 4.4744334 | up |
| ASMM9PARTA013174        | Gm11645          | 0.013890307 | 2.1863253 | up |
| ASMM9PARTA010441        | Gm15560          | 0.000165    | 2.5293121 | up |
| ASMM9PARTA015224        | BC065397         | 0.008927985 | 3.6267095 | up |
| ASMM9PARTA015224        | BC065397         | 0.008927985 | 3.6267095 | up |
| ASMM9PARTA015224        | BC065397         | 0.008927985 | 3.6267095 | up |
| ASMM9PARTA015224        | BC065397         | 0.008927985 | 3.6267095 | up |
| ASMM9PARTA015224        | BC065397         | 0.008927985 | 3.6267095 | up |
| ASMM9PARTA015224        | BC065397         | 0.008927985 | 3.6267095 | up |
| ASMM9PARTA015224        | BC065397         | 0.008927985 | 3.6267095 | up |
| ASMM9PARTA015224        | BC065397         | 0.008927985 | 3.6267095 | up |
| ASMM9PARTA015224        | BC065397         | 0.008927985 | 3.6267095 | up |
| AI507909_P1             | humanlincRNA1257 | 0.000895    | 2.1752374 | up |
| ASMM9PARTA046107        | AK039957         | 0.016099673 | 2.4726522 | up |
| ASMM9PARTA010032        | Gm5301           | 0.01462416  | 3.6166127 | up |
| ASMM9PARTA002609        |                  | 0.010847926 | 2.2261055 | up |
| ASMM9PARTA015960        | 9430065F17Rik    | 0.005798801 | 3.8265884 | up |
| ASMM9PARTA015960        | 9430065F17Rik    | 0.005798801 | 3.8265884 | up |
| ASMM9PARTA015440        | 1010001N08Rik    | 0.038398307 | 2.7971175 | up |
| ASMM9PARTA011704        | Gm13888          | 0.001015393 | 2.811255  | up |
| ASMM9PARTA051582        | AK019838         | 0.000227    | 2.294279  | up |
| MM9LINCRNAEXON10406-_P1 | mouselincRNA1260 | 0.005678954 | 2.2176535 | up |
| ASMM9PARTA017130        | Trim30e-ps1      | 0.000287    | 3.6224866 | up |
| ASMM9PARTA011738        | Gm15470          | 0.000173    | 2.490983  | up |
| ASMM9PARTA016451        | 2810008D09Rik    | 0.000000176 | 2.7259521 | up |

|                         |                  |             |           |    |
|-------------------------|------------------|-------------|-----------|----|
| C80954_P1               | humanlincRNA2399 | 0.003684981 | 2.344546  | up |
| ASMM9PARTA011242        | Gm12230          | 0.0000993   | 2.113646  | up |
| ASMM9PARTA011242        | Gm12230          | 0.0000993   | 2.113646  | up |
| ASMM9PARTA011242        | Gm12230          | 0.0000993   | 2.113646  | up |
| ASMM9PARTA006207        |                  | 0.040964875 | 2.3859847 | up |
| ASMM9PARTA048537        | NR_002853        | 0.000443    | 2.4265592 | up |
| BI107540_P1             | mouselincRNA1064 | 0.003572188 | 2.9005456 | up |
| ASMM9PARTA016905        | 2900053O20Rik    | 0.000701    | 2.3093138 | up |
| ASMM9PARTA000492        |                  | 0.00163919  | 3.171052  | up |
| CUST_139_PI426073487    | uc.141           | 0.010394    | 2.5208695 | up |
| ASMM9PARTA050019        | AK148461         | 0.007578794 | 2.5351596 | up |
| ASMM9PARTA005495        |                  | 0.002343658 | 2.558607  | up |
| ASMM9PARTA007417        |                  | 0.002312835 | 3.6152418 | up |
| ASMM9PARTA013190        | Gm7386           | 0.003171985 | 4.6355166 | up |
| ASMM9PARTA011381        | Mup-ps14         | 0.0000522   | 5.1827497 | up |
| ASMM9PARTA013040        | Gm13577          | 0.0000595   | 2.7623637 | up |
| ASMM9PARTA048165        | Rabl2a           | 0.003768752 | 2.053208  | up |
| ASMM9PARTA003806        |                  | 0.00000252  | 3.0298662 | up |
| ASMM9PARTA003377        |                  | 0.003897649 | 3.1048882 | up |
| MM9LINCRNAEXON10455-_P1 | mouselincRNA1287 | 0.0231683   | 2.5350296 | up |
| CUST_184_PI426409190    |                  | 0.021069337 | 3.335752  | up |
| ASMM9PARTA003640        |                  | 0.040449712 | 2.539668  | up |
| ASMM9PARTA002033        |                  | 0.009132157 | 2.2649715 | up |
| ASMM9PARTA010114        | Gm11041          | 0.03261728  | 2.651793  | up |
| ASMM9PARTA010303        | Mup-ps4          | 0.0000907   | 14.846834 | up |
| ASMM9PARTA011188        | Hmgb1-ps4        | 0.0000992   | 2.7126071 | up |
| ASMM9PARTA008507        |                  | 0.026753385 | 2.4017262 | up |
| ASMM9PARTA014823        | A230056P14Rik    | 0.0000224   | 2.757427  | up |
| ASMM9PARTA014823        | A230056P14Rik    | 0.0000224   | 2.757427  | up |
| ASMM9PARTA018579        | AC159633.1       | 0.0000132   | 2.825753  | up |
| ASMM9PARTA005922        |                  | 0.006871192 | 4.436601  | up |
| ASMM9PARTA015378        | C920006O11Rik    | 0.000426    | 2.0906298 | up |
| ASMM9PARTA013980        | 2810403D21Rik    | 0.007480211 | 3.1815767 | up |
| ASMM9PARTA015335        | B230314M03Rik    | 0.012495741 | 3.6262882 | up |
| ASMM9PARTA004370        |                  | 0.000578    | 2.4249277 | up |
| MM9LINCRNAEXON11226-_P1 | mouselincRNA0717 | 0.010145209 | 2.037533  | up |
| ASMM9PARTA046618        | AK084560         | 0.025179215 | 2.0396233 | up |
| MM9LINCRNAEXON11010-_P1 | mouselincRNA0889 | 0.027233997 | 2.227396  | up |
| mouselincRNA0491-_P1    | mouselincRNA0491 | 0.008828104 | 2.0486982 | up |
| ASMM9PARTA015039        | Gm15462          | 0.004822339 | 2.4003394 | up |
| ASMM9PARTA018383        | Gm16551          | 0.00000147  | 2.4987392 | up |
| ASMM9PARTA018240        | 7SK.318          | 0.00000644  | 2.9303522 | up |
| MM9LINCRNAEXON10775+_P1 | mouselincRNA1143 | 0.003697956 | 3.6121304 | up |
| ASMM9PARTA051179        | AK162599         | 0.0000507   | 3.1958008 | up |
| ASMM9PARTA047767        | AK043130         | 0.00000375  | 2.4398158 | up |
| ASMM9PARTA047767        | AK043130         | 0.00000375  | 2.4398158 | up |
| ASMM9PARTA010173        | Gm7146           | 0.04551591  | 2.176919  | up |
| ASMM9PARTA008433        |                  | 0.0000179   | 3.665015  | up |
| ASMM9PARTA044951        | 1700086O06Rik    | 0.000482    | 3.9681792 | up |

|                         |                  |             |           |    |
|-------------------------|------------------|-------------|-----------|----|
| CUST_322_PI426073487    | uc.324           | 0.019943956 | 2.7071564 | up |
| CUST_322_PI426073487    | uc.324           | 0.019943956 | 2.7071564 | up |
| CA749839_P1             | humanlincRNA1455 | 0.01808123  | 4.0205665 | up |
| ASMM9PARTA005626        |                  | 0.000494    | 2.4046261 | up |
| ASMM9PARTA046629        | AK020767         | 0.015835892 | 2.3768265 | up |
| ASMM9PARTA013524        | Gm16407          | 0.002360373 | 19.78195  | up |
| ASMM9PARTA006409        |                  | 0.0000904   | 2.274538  | up |
| ASMM9PARTA047151        | MAIR-IIa         | 0.001320717 | 3.3561897 | up |
| ASMM9PARTA012161        | Gm13239          | 0.0000693   | 2.5783002 | up |
| ASMM9PARTA019355        | RP23-141L18.6    | 0.000612    | 2.120292  | up |
| ASMM9PARTA016604        | 9530034E10Rik    | 0.005028    | 2.0953546 | up |
| ASMM9PARTA016604        | 9530034E10Rik    | 0.005028    | 2.0953546 | up |
| MM9LINCRNAEXON10991+_P1 |                  | 0.001675298 | 2.293769  | up |
| ASMM9PARTA013682        | Gm15886          | 0.04022039  | 2.3559144 | up |
| ASMM9PARTA046040        | 4931406H21Rik    | 0.003887632 | 2.6124833 | up |
| ASMM9PARTA010442        | Gm10599          | 0.000000179 | 13.688693 | up |
| ASMM9PARTA051038        | BC065393         | 0.0000718   | 2.7037144 | up |
| ASMM9PARTA051038        | BC065393         | 0.0000718   | 2.7037144 | up |
| ASMM9PARTA051038        | BC065393         | 0.0000718   | 2.7037144 | up |
| BY365805_P1             | humanlincRNA1892 | 0.002442787 | 2.1303322 | up |
| ASMM9PARTA019050        | RP24-252L3.2     | 0.00000167  | 2.5991938 | up |
| ASMM9PARTA014539        | Gm16095          | 0.010736348 | 2.3576593 | up |
| ASMM9PARTA005761        |                  | 0.000382    | 2.3918576 | up |
| CUST_237_PI426073487    | uc.239           | 0.001489799 | 2.2062602 | up |
| mouselincRNA0953+_P1    | mouselincRNA0953 | 0.015228151 | 2.0030901 | up |
| ASMM9PARTA011894        | Gm14593          | 0.000402    | 2.3081677 | up |
| ASMM9PARTA050563        | AK039589         | 0.017318878 | 3.5861382 | up |
| MM9LINCRNAEXON11384+_P1 | mouselincRNA0595 | 0.031554114 | 2.3597822 | up |
| ASMM9PARTA001301        |                  | 0.02248129  | 2.456022  | up |
| CUST_909_PI426073487    | uc.430           | 0.0000187   | 22.395819 | up |
| CUST_909_PI426073487    | uc.430           | 0.0000187   | 22.395819 | up |
| CUST_909_PI426073487    | uc.430           | 0.0000187   | 22.395819 | up |
| CUST_909_PI426073487    | uc.430           | 0.0000187   | 22.395819 | up |
| CUST_909_PI426073487    | uc.430           | 0.0000187   | 22.395819 | up |
| ASMM9PARTA007338        |                  | 0.002050941 | 2.5473962 | up |
| ASMM9PARTA015671        | Gm13546          | 0.023608143 | 2.4103231 | up |
| MM9LINCRNAEXON11327+_P1 | mouselincRNA0531 | 0.032593045 | 2.2561057 | up |
| ASMM9PARTA005615        |                  | 0.009516534 | 2.9427543 | up |
| CN672059_P1             | humanlincRNA2025 | 0.0000922   | 2.4198492 | up |
| MM9LINCRNAEXON11092+_P1 | mouselincRNA0819 | 0.002204432 | 2.0520997 | up |
| ASMM9PARTA002874        |                  | 2.43E-08    | 48.727898 | up |
| ASMM9PARTA003274        |                  | 0.000491    | 2.0557833 | up |
| ASMM9PARTA018348        | Gm15717          | 0.001811937 | 2.3001482 | up |
| ASMM9PARTA006865        |                  | 0.000116    | 6.070025  | up |
| ASMM9PARTA004660        |                  | 0.00134421  | 2.2092893 | up |
| ASMM9PARTA045220        | Tmem181c-ps      | 0.041677628 | 2.1093931 | up |
| ASMM9PARTA009067        |                  | 0.000263    | 2.0018008 | up |
| ASMM9PARTA005238        |                  | 0.00000146  | 5.201726  | up |
| ASMM9PARTA010309        | Gm3371           | 0.000185    | 3.9100728 | up |

|                         |                  |             |           |    |
|-------------------------|------------------|-------------|-----------|----|
| ASMM9PARTA012864        | Gm9670           | 0.000165    | 2.4267838 | up |
| ASMM9PARTA015594        | D430001F17Rik    | 0.001629931 | 2.1788428 | up |
| ASMM9PARTA011300        | Gm9078           | 0.0000268   | 2.1964676 | up |
| ASMM9PARTA008851        |                  | 0.000503    | 2.3063297 | up |
| ASMM9PARTA019195        | Mup-ps4          | 0.0000158   | 5.711015  | up |
| CUST_580_PI426073487    | uc.101           | 0.000115    | 2.40203   | up |
| CUST_580_PI426073487    | uc.101           | 0.000115    | 2.40203   | up |
| ASMM9PARTA003874        |                  | 0.0000244   | 2.2392695 | up |
| ASMM9PARTA045847        | AK076931         | 0.020919668 | 2.692896  | up |
| ASMM9PARTA009113        | 3010003L21Rik    | 0.020108035 | 2.722407  | up |
| ASMM9PARTA017692        | Gm7819           | 0.0000242   | 2.9961915 | up |
| MM9LINCRNAEXON10291-_P1 | mouselincRNA1500 | 0.003203733 | 2.404002  | up |
| ASMM9PARTA005100        |                  | 0.042936664 | 3.25303   | up |
| ASMM9PARTA009651        | Gm11270          | 0.0000691   | 2.6335354 | up |
| ASMM9PARTA046659        | 4933439F18Rik    | 0.000433    | 3.868869  | up |
| ASMM9PARTA046659        | 4933439F18Rik    | 0.000433    | 3.868869  | up |
| ASMM9PARTA049376        | Tpd52l2          | 0.049359888 | 3.007286  | up |
| MM9LINCRNAEXON11316+_P1 | mouselincRNA0662 | 0.001220781 | 5.289778  | up |
| ASMM9PARTA006359        |                  | 0.00000169  | 17.210634 | up |
| ASMM9PARTA048810        | AK042686         | 0.016800616 | 2.2249417 | up |
| ASMM9PARTA005198        |                  | 0.000112    | 2.312427  | up |
| ASMM9PARTA001166        |                  | 0.000379    | 2.2282903 | up |
| ASMM9PARTA016490        | Gm15850          | 0.034122057 | 2.1715176 | up |
| ASMM9PARTA014438        | Pisd-ps2         | 0.0000848   | 2.8530047 | up |
| ASMM9PARTA006821        |                  | 0.000245    | 2.1837595 | up |
| ASMM9PARTA013474        | Gm1947           | 0.00249382  | 2.239121  | up |
| ASMM9PARTA050923        | AK140288         | 0.00027     | 2.330448  | up |
| ASMM9PARTA050923        | AK140288         | 0.00027     | 2.330448  | up |
| ASMM9PARTA003714        |                  | 0.00000904  | 3.1356792 | up |
| ASMM9PARTA048887        | BC049717         | 0.000949    | 2.0402954 | up |
| CUST_72_PI426073487     | uc.74            | 0.04289264  | 2.6336536 | up |
| ASMM9PARTA006224        |                  | 0.002643993 | 2.2698817 | up |
| MM9LINCRNAEXON10990-_P1 |                  | 0.000217    | 2.0491824 | up |
| ASMM9PARTA002107        |                  | 0.010282259 | 2.486463  | up |
| ASMM9PARTA045174        | F730043M19Rik    | 0.0000109   | 2.0907702 | up |
| ASMM9PARTA011834        | Gm13013          | 0.000197    | 2.7611177 | up |
| ASMM9PARTA003242        |                  | 0.000013    | 5.450424  | up |
| ASMM9PARTA007725        |                  | 0.001178287 | 2.1477537 | up |
| ASMM9PARTA010226        | Gm5859           | 0.000232    | 3.999183  | up |
| ASMM9PARTA018880        | RP24-494O2.2     | 0.002038356 | 2.7605364 | up |
| ASMM9PARTA011084        | Gm11212          | 0.001707489 | 7.1417847 | up |
| ASMM9PARTA003922        |                  | 0.002017855 | 2.0481236 | up |
| ASMM9PARTA003922        |                  | 0.002017855 | 2.0481236 | up |
| ASMM9PARTA003922        |                  | 0.002017855 | 2.0481236 | up |
| ASMM9PARTA003922        |                  | 0.002017855 | 2.0481236 | up |
| ASMM9PARTA003546        |                  | 0.001226021 | 5.201623  | up |
| ASMM9PARTA050374        | C130026L21Rik    | 0.000012    | 2.4183884 | up |
| ASMM9PARTA049104        | Caper            | 0.000114    | 2.2018623 | up |
| ASMM9PARTA048951        | AK017239         | 0.021493174 | 2.3300061 | up |

|                         |                  |             |            |    |
|-------------------------|------------------|-------------|------------|----|
| ASMM9PARTA006532        |                  | 0.000752    | 2.1807957  | up |
| ASMM9PARTA009763        | Gm10599          | 0.0000116   | 3.7107363  | up |
| ASMM9PARTA049106        | AK048878         | 0.043503724 | 2.885898   | up |
| ASMM9PARTA004587        |                  | 0.003764876 | 3.582118   | up |
| ASMM9PARTA014282        | Gm15991          | 0.002124584 | 3.5229528  | up |
| ASMM9PARTA002934        |                  | 0.000493    | 2.1732612  | up |
| ASMM9PARTA045544        | 4933409K07Rik    | 0.00027     | 2.7417903  | up |
| ASMM9PARTA015617        | Gm15133          | 0.018541634 | 3.162094   | up |
| ASMM9PARTA049885        | ADAM22           | 0.049733885 | 3.426075   | up |
| ASMM9PARTA049885        | ADAM22           | 0.049733885 | 3.426075   | up |
| ASMM9PARTA049885        | ADAM22           | 0.049733885 | 3.426075   | up |
| ASMM9PARTA008175        |                  | 0.009049292 | 3.0822744  | up |
| ASMM9PARTA005146        |                  | 0.003144833 | 2.3215868  | up |
| ASMM9PARTA001618        |                  | 0.000106    | 2.693052   | up |
| ASMM9PARTA012178        | Mup-ps13         | 0.00000369  | 5.597641   | up |
| MM9LINCRNAEXON10071-_P1 | mouselincRNA1506 | 0.010094375 | 4.4578896  | up |
| ASMM9PARTA013664        | Gm7840           | 0.001021861 | 2.5210145  | up |
| MM9LINCRNAEXON11571+_P1 | mouselincRNA0391 | 0.000878    | 3.9741454  | up |
| ASMM9PARTA011562        | Gm15039          | 0.008076821 | 2.3185952  | up |
| ASMM9PARTA046079        | 5430416N02Rik    | 0.0000735   | 3.6734188  | up |
| mouselincRNA0327+_P1    | mouselincRNA0327 | 0.002574732 | 2.9376884  | up |
| MM9LINCRNAEXON10848+_P1 | mouselincRNA0988 | 0.005376498 | 4.290399   | up |
| ASMM9PARTA004819        |                  | 0.000032    | 2.6319525  | up |
| ASMM9PARTA019265        | RP23-48M16.7     | 0.002186676 | 2.5394754  | up |
| ASMM9PARTA013391        | Gm9153           | 0.000326    | 2.1752706  | up |
| ASMM9PARTA001271        |                  | 0.04103195  | 3.6561942  | up |
| ASMM9PARTA004768        |                  | 0.002682594 | 2.5968246  | up |
| ASMM9PARTA006391        |                  | 0.040181704 | 2.3498719  | up |
| MM9LINCRNAEXON11855+_P1 |                  | 0.01677595  | 2.2109182  | up |
| ASMM9PARTA008119        |                  | 0.018987644 | 2.10819    | up |
| ASMM9PARTA008119        |                  | 0.018987644 | 2.10819    | up |
| ASMM9PARTA008119        |                  | 0.018987644 | 2.10819    | up |
| ASMM9PARTA051336        | AK020190         | 0.000000262 | 12.0142975 | up |
| ASMM9PARTA008441        |                  | 0.000295    | 3.965789   | up |
| ASMM9PARTA008441        |                  | 0.000295    | 3.965789   | up |
| ASMM9PARTA049182        | AK196015         | 0.013071364 | 2.4283123  | up |
| ASMM9PARTA049182        | AK196015         | 0.013071364 | 2.4283123  | up |
| humanlincRNA1148-_P1    | humanlincRNA1148 | 0.03532807  | 2.584566   | up |
| ASMM9PARTA005106        |                  | 0.02291107  | 3.844378   | up |
| ASMM9PARTA005106        |                  | 0.02291107  | 3.844378   | up |
| ASMM9PARTA005643        |                  | 0.01246422  | 2.6930146  | up |
| ASMM9PARTA005643        |                  | 0.01246422  | 2.6930146  | up |
| MM9LINCRNAEXON11076-_P1 |                  | 0.0000284   | 4.9582014  | up |
| ASMM9PARTA016156        | Gm12023          | 0.018250003 | 2.0630453  | up |
| humanlincRNA1751+_P1    | humanlincRNA1751 | 0.0000187   | 3.9547136  | up |
| MM9LINCRNAEXON11077-_P1 |                  | 0.00234579  | 3.0199275  | up |
| ASMM9PARTA010539        | Gm12165          | 0.001406168 | 2.3956766  | up |
| ASMM9PARTA009943        | Gm8062           | 0.00000126  | 3.7414384  | up |
| ASMM9PARTA009158        |                  | 0.000156    | 4.5355268  | up |

|                         |                  |             |           |    |
|-------------------------|------------------|-------------|-----------|----|
| ASMM9PARTA017775        | 1700080N15Rik    | 0.03840659  | 2.431088  | up |
| ASMM9PARTA011960        | Gm11704          | 0.0000191   | 3.0662272 | up |
| ASMM9PARTA011393        | Gm11199          | 0.002621835 | 2.0320184 | up |
| ASMM9PARTA012289        | Gm14442          | 0.001934686 | 2.2335358 | up |
| ASMM9PARTA012289        | Gm14442          | 0.001934686 | 2.2335358 | up |
| ASMM9PARTA047903        | AK039376         | 0.013849491 | 5.160548  | up |
| BY321897_P1             | mouselincRNA1398 | 0.049968    | 2.2319455 | up |
| ASMM9PARTA051767        | AK042998         | 0.000649    | 2.2017314 | up |
| ASMM9PARTA008423        |                  | 0.001317778 | 2.607696  | up |
| ASMM9PARTA004278        |                  | 0.01337667  | 2.2351344 | up |
| ASMM9PARTA047854        | AK040737         | 0.001505451 | 2.720816  | up |
| ASMM9PARTA007358        |                  | 0.00017     | 2.2416778 | up |
| ASMM9PARTA013273        | Gm8178           | 0.000131    | 2.2250764 | up |
| AI507368_P1             | humanlincRNA2050 | 0.001653387 | 2.6645076 | up |
| ASMM9PARTA007105        |                  | 0.040792417 | 2.2196145 | up |
| ASMM9PARTA049586        | Il7              | 0.006104276 | 2.6041915 | up |
| ASMM9PARTA049409        | Tgm2             | 0.006833945 | 2.5027092 | up |
| ASMM9PARTA007457        |                  | 0.00000615  | 3.0624819 | up |
| ASMM9PARTA016699        | Gm11274          | 0.0000411   | 3.8522258 | up |
| MM9LINCRNAEXON10403-_P1 | mouselincRNA1259 | 0.012309696 | 2.0408568 | up |
| ASMM9PARTA004883        |                  | 0.002041745 | 3.4197848 | up |
| ASMM9PARTA004883        |                  | 0.002041745 | 3.4197848 | up |
| ASMM9PARTA001842        |                  | 0.000295    | 4.713204  | up |
| ASMM9PARTA007881        |                  | 0.031380463 | 2.2529385 | up |
| ASMM9PARTA011798        | Gm14901          | 0.0000952   | 2.223135  | up |
| ASMM9PARTA011798        | Gm14901          | 0.0000952   | 2.223135  | up |
| ASMM9PARTA012086        | Gm12687          | 0.001364371 | 2.0141764 | up |
| ASMM9PARTA002185        |                  | 0.013646789 | 2.0110724 | up |
| ASMM9PARTA002185        |                  | 0.013646789 | 2.0110724 | up |
| ASMM9PARTA002185        |                  | 0.013646789 | 2.0110724 | up |
| ASMM9PARTA008215        |                  | 0.001599787 | 2.6774795 | up |
| MM9LINCRNAEXON12111-_P1 | mouselincRNA0122 | 0.000000188 | 8.041722  | up |
| ASMM9PARTA019467        | RP24-318H2.3     | 0.0241083   | 3.6438258 | up |
| ASMM9PARTA008826        |                  | 0.003225998 | 2.0662498 | up |
| CUST_171_P1426073487    | uc.173           | 0.0000837   | 2.7726395 | up |
| ASMM9PARTA010185        | Gm12568          | 0.00000273  | 2.981855  | up |
| ASMM9PARTA046838        | AK138505         | 0.000981    | 2.5629282 | up |
| ASMM9PARTA046838        | AK138505         | 0.000981    | 2.5629282 | up |
| ASMM9PARTA046838        | AK138505         | 0.000981    | 2.5629282 | up |
| ASMM9PARTA000820        |                  | 0.0000915   | 16.098686 | up |
| ASMM9PARTA000820        |                  | 0.0000915   | 16.098686 | up |
| MM9LINCRNAEXON11562-_P1 | mouselincRNA0381 | 0.010353497 | 2.0829291 | up |
| CUST_407_P1426073487    | uc.409           | 0.000719    | 2.3269606 | up |
| humanlincRNA0518+_P1    | humanlincRNA0518 | 0.0000811   | 3.7236433 | up |
| ASMM9PARTA015498        | AI451557         | 0.000668    | 2.0574825 | up |
| EL964962_P1             | mouselincRNA0001 | 0.003955408 | 4.071823  | up |
| humanlincRNA1546-_P1    | humanlincRNA1546 | 0.010746875 | 2.9871545 | up |
| ASMM9PARTA016744        | Gm10863          | 0.047607485 | 2.5047936 | up |
| ASMM9PARTA002361        |                  | 0.0000165   | 2.0532448 | up |



|                         |                  |             |           |    |
|-------------------------|------------------|-------------|-----------|----|
| AK145365_P1             | mouselincRNA1288 | 0.002516194 | 3.7512045 | up |
| ASMM9PARTA018655        | Gm10075          | 0.0000143   | 2.9120884 | up |
| ASMM9PARTA050637        | smarp            | 0.001593024 | 2.5456998 | up |
| ASMM9PARTA012744        | Gm15693          | 0.000893    | 2.2510507 | up |
| BY725911_P1             | mouselincRNA0668 | 0.044335973 | 2.0044153 | up |
| ASMM9PARTA018588        | Gm16118          | 0.000000941 | 3.7365682 | up |
| ASMM9PARTA006159        |                  | 0.009355998 | 3.3225546 | up |
| ASMM9PARTA005665        |                  | 0.000472    | 2.183836  | up |
| ASMM9PARTA013927        | Gm16002          | 0.00000463  | 6.3231006 | up |
| ASMM9PARTA017658        | Gm13790          | 0.042296667 | 2.1728554 | up |
| ASMM9PARTA016645        | Gm14090          | 0.032816384 | 2.0021355 | up |
| ASMM9PARTA000801        |                  | 0.00017     | 3.4467328 | up |
| ASMM9PARTA050305        | AK031300         | 0.016717825 | 2.3399742 | up |
| ASMM9PARTA004715        |                  | 0.000000149 | 7.717302  | up |
| ASMM9PARTA045616        | Serpina3h        | 0.000614    | 2.7422664 | up |
| BX636194_P1             | mouselincRNA1032 | 0.013654836 | 2.5980556 | up |
| ASMM9PARTA005646        |                  | 0.00820253  | 2.0123851 | up |
| ASMM9PARTA005646        |                  | 0.00820253  | 2.0123851 | up |
| ASMM9PARTA007593        |                  | 0.005125153 | 3.678817  | up |
| ASMM9PARTA046706        | AK082467         | 0.000000602 | 7.714457  | up |
| ASMM9PARTA045201        | Gm10565          | 0.0379293   | 2.8846593 | up |
| ASMM9PARTA050227        | BC028660         | 0.024266167 | 3.024105  | up |
| ASMM9PARTA017822        | 7SK.135          | 0.000748    | 3.1937835 | up |
| ASMM9PARTA045165        | Gm8234           | 0.0000421   | 2.4578252 | up |
| ASMM9PARTA049900        | 1700028K03Rik    | 0.001609577 | 2.0009012 | up |
| ASMM9PARTA049900        | 1700028K03Rik    | 0.001609577 | 2.0009012 | up |
| ASMM9PARTA049900        | 1700028K03Rik    | 0.001609577 | 2.0009012 | up |
| ASMM9PARTA049900        | 1700028K03Rik    | 0.001609577 | 2.0009012 | up |
| ASMM9PARTA049900        | 1700028K03Rik    | 0.001609577 | 2.0009012 | up |
| ASMM9PARTA049900        | 1700028K03Rik    | 0.001609577 | 2.0009012 | up |
| ASMM9PARTA049900        | 1700028K03Rik    | 0.001609577 | 2.0009012 | up |
| MM9LINCRNAEXON12089+_P1 | mouselincRNA0102 | 0.022283986 | 2.5649867 | up |
| ASMM9PARTA050899        | AK166824         | 0.001238364 | 2.4209611 | up |
| ASMM9PARTA006971        |                  | 0.037790198 | 3.2771153 | up |
| MM9LINCRNAEXON12056-_P1 | mouselincRNA0073 | 0.000368    | 6.711888  | up |
| ASMM9PARTA017493        | Gm15692          | 0.0000662   | 2.5697474 | up |
| ASMM9PARTA017493        | Gm15692          | 0.0000662   | 2.5697474 | up |
| ASMM9PARTA013963        | 6030471H07Rik    | 0.026871068 | 2.4950523 | up |
| MM9LINCRNAEXON11755+_P1 |                  | 0.0000778   | 2.4311874 | up |
| BI108441_P1             | mouselincRNA0637 | 0.002089665 | 3.0207336 | up |
| BI108441_P1             | mouselincRNA0637 | 0.002089665 | 3.0207336 | up |
| BI108441_P1             | mouselincRNA0637 | 0.002089665 | 3.0207336 | up |
| BI108441_P1             | mouselincRNA0637 | 0.002089665 | 3.0207336 | up |
| BI108441_P1             | mouselincRNA0637 | 0.002089665 | 3.0207336 | up |
| BI108441_P1             | mouselincRNA0637 | 0.002089665 | 3.0207336 | up |
| BI108441_P1             | mouselincRNA0637 | 0.002089665 | 3.0207336 | up |
| BI108441_P1             | mouselincRNA0637 | 0.002089665 | 3.0207336 | up |
| BI108441_P1             | mouselincRNA0637 | 0.002089665 | 3.0207336 | up |
| CUST_173_PI426409190    |                  | 0.0000198   | 3.7454646 | up |

|                         |                  |             |           |    |
|-------------------------|------------------|-------------|-----------|----|
| ASMM9PARTA007295        |                  | 0.03300677  | 2.223998  | up |
| ASMM9PARTA002895        |                  | 0.0000664   | 3.036509  | up |
| MM9LINCRNAEXON11730-_P1 |                  | 0.000000323 | 21.458044 | up |
| CK379655_P1             | humanlincRNA1585 | 0.04898197  | 2.627792  | up |
| ASMM9PARTA016945        | A230056P14Rik    | 0.0000145   | 3.817645  | up |
| ASMM9PARTA000137        |                  | 0.0000181   | 7.1219735 | up |
| MM9LINCRNAEXON11978+_P1 | mouselincRNA0222 | 0.003712853 | 2.563598  | up |
| MM9LINCRNAEXON11855-_P1 |                  | 0.04749484  | 3.527621  | up |
| MM9LINCRNAEXON11855-_P1 |                  | 0.04749484  | 3.527621  | up |
| MM9LINCRNAEXON11855-_P1 |                  | 0.04749484  | 3.527621  | up |
| ASMM9PARTA008934        |                  | 0.015762908 | 2.701945  | up |
| ASMM9PARTA017917        | Gm16143          | 0.0000255   | 4.7346373 | up |
| ASMM9PARTA001656        |                  | 0.012663266 | 2.0601208 | up |
| MM9LINCRNAEXON10903-_P1 |                  | 0.000474    | 2.6986115 | up |
| ASMM9PARTA012091        | Gm12262          | 0.011555783 | 4.373014  | up |
| ASMM9PARTA046504        | Sfi1             | 0.04870597  | 2.2429795 | up |
| ASMM9PARTA008616        |                  | 0.037262544 | 2.7010329 | up |
| ASMM9PARTA013032        | Gm5383           | 0.001402283 | 2.0569284 | up |
| ASMM9PARTA015147        | Gm8817           | 0.03249829  | 2.200502  | up |
| humanlincRNA0574+_P1    | humanlincRNA0574 | 0.017278384 | 2.6009798 | up |
| ASMM9PARTA009783        | 4932415M13Rik    | 0.000425    | 2.7867901 | up |
| ASMM9PARTA008094        |                  | 0.021004593 | 2.81872   | up |
| MM9LINCRNAEXON11219+_P1 | mouselincRNA0701 | 0.004055457 | 2.1044128 | up |
| ASMM9PARTA047312        | AK036683         | 0.008652229 | 3.2410846 | up |
| ASMM9PARTA009446        | Mageb16-ps2      | 0.011625608 | 2.0846617 | up |
| ASMM9PARTA009446        | Mageb16-ps2      | 0.011625608 | 2.0846617 | up |
| ASMM9PARTA008266        |                  | 0.03052738  | 2.151655  | up |
| ASMM9PARTA012816        | Gm12006          | 0.017849    | 3.1609411 | up |
| ASMM9PARTA012761        | Gm15799          | 0.000206    | 2.267382  | up |
| ASMM9PARTA012202        | Gm5942           | 0.000996    | 2.1706877 | up |
| ASMM9PARTA012112        | Gm14739          | 0.031601164 | 2.220677  | up |
| ASMM9PARTA051219        | AK029875         | 0.000145    | 3.027687  | up |
| ASMM9PARTA015905        | Gm13056          | 0.000367    | 6.6384277 | up |
| ASMM9PARTA017308        | Gm12472          | 0.03028674  | 2.3060696 | up |
| ASMM9PARTA011898        | Mup-ps16         | 0.0000223   | 2.4326117 | up |
| ASMM9PARTA045091        | Snhg3            | 0.00037     | 2.0472598 | up |
| ASMM9PARTA051534        | AK010793         | 0.004530279 | 6.0006886 | up |
| ASMM9PARTA010111        | Gm10977          | 0.0000453   | 2.647849  | up |
| ASMM9PARTA006234        |                  | 0.009313879 | 2.068487  | up |
| ASMM9PARTA012332        | Mup-ps21         | 0.000601    | 3.2815022 | up |
| ASMM9PARTA011325        | Gm12351          | 0.00076     | 2.2448652 | up |
| ASMM9PARTA012600        | Gm7966           | 0.0000248   | 2.6037138 | up |
| ASMM9PARTA006616        |                  | 0.001158617 | 2.5371776 | up |
| ASMM9PARTA047369        | AK006031         | 0.002195611 | 2.3695242 | up |
| ASMM9PARTA016820        | AW495222         | 0.0000794   | 2.2110105 | up |
| CUST_600_PI426073487    | uc.121           | 0.008126531 | 4.497435  | up |
| ASMM9PARTA050294        | AK035387         | 0.006486616 | 2.4051902 | up |
| ASMM9PARTA016823        | BC037032         | 0.02000702  | 2.1161623 | up |
| ASMM9PARTA008377        |                  | 0.000531    | 2.343185  | up |

|                         |                  |             |           |    |
|-------------------------|------------------|-------------|-----------|----|
| ASMM9PARTA016400        | Gm12204          | 0.003325343 | 3.2655756 | up |
| ASMM9PARTA006996        |                  | 0.014006976 | 3.6733685 | up |
| ASMM9PARTA007841        |                  | 0.001121077 | 2.401625  | up |
| ASMM9PARTA012724        | Gm11307          | 0.001982323 | 2.0375216 | up |
| ASMM9PARTA008655        |                  | 0.023679594 | 2.3027277 | up |
| ASMM9PARTA008655        |                  | 0.023679594 | 2.3027277 | up |
| ASMM9PARTA008655        |                  | 0.023679594 | 2.3027277 | up |
| ASMM9PARTA045692        | Gm3893           | 0.0000145   | 23.297878 | up |
| ASMM9PARTA045692        | Gm3893           | 0.0000145   | 23.297878 | up |
| ASMM9PARTA045692        | Gm3893           | 0.0000145   | 23.297878 | up |
| ASMM9PARTA045692        | Gm3893           | 0.0000145   | 23.297878 | up |
| ASMM9PARTA045692        | Gm3893           | 0.0000145   | 23.297878 | up |
| ASMM9PARTA045692        | Gm3893           | 0.0000145   | 23.297878 | up |
| ASMM9PARTA045692        | Gm3893           | 0.0000145   | 23.297878 | up |
| ASMM9PARTA045692        | Gm3893           | 0.0000145   | 23.297878 | up |
| ASMM9PARTA045692        | Gm3893           | 0.0000145   | 23.297878 | up |
| ASMM9PARTA045692        | Gm3893           | 0.0000145   | 23.297878 | up |
| ASMM9PARTA045692        | Gm3893           | 0.0000145   | 23.297878 | up |
| ASMM9PARTA045692        | Gm3893           | 0.0000145   | 23.297878 | up |
| ASMM9PARTA045692        | Gm3893           | 0.0000145   | 23.297878 | up |
| ASMM9PARTA045692        | Gm3893           | 0.0000145   | 23.297878 | up |
| ASMM9PARTA045692        | Gm3893           | 0.0000145   | 23.297878 | up |
| ASMM9PARTA045692        | Gm3893           | 0.0000145   | 23.297878 | up |
| ASMM9PARTA045692        | Gm3893           | 0.0000145   | 23.297878 | up |
| ASMM9PARTA045692        | Gm3893           | 0.0000145   | 23.297878 | up |
| ASMM9PARTA045692        | Gm3893           | 0.0000145   | 23.297878 | up |
| ASMM9PARTA045692        | Gm3893           | 0.0000145   | 23.297878 | up |
| ASMM9PARTA045692        | Gm3893           | 0.0000145   | 23.297878 | up |
| ASMM9PARTA045692        | Gm3893           | 0.0000145   | 23.297878 | up |
| ASMM9PARTA045692        | Gm3893           | 0.0000145   | 23.297878 | up |
| ASMM9PARTA045692        | Gm3893           | 0.0000145   | 23.297878 | up |
| MM9LINCRNAEXON11831+_P1 |                  | 0.0000261   | 2.402831  | up |
| ASMM9PARTA012969        | Mup-ps20         | 0.000206    | 6.7438145 | up |
| ASMM9PARTA001927        |                  | 0.000115    | 2.134282  | up |
| ASMM9PARTA045146        | 3110070M22Rik    | 0.000202    | 5.618087  | up |
| ASMM9PARTA045146        | 3110070M22Rik    | 0.000202    | 5.618087  | up |
| ASMM9PARTA013439        | Gm15545          | 0.027878832 | 2.5476606 | up |
| ASMM9PARTA001481        |                  | 0.001773122 | 4.7225776 | up |
| MM9LINCRNAEXON11830+_P1 | mouselincRNA0272 | 0.012886777 | 2.2233913 | up |
| ASMM9PARTA012145        | Gm11830          | 0.000018    | 3.6044834 | up |
| ASMM9PARTA047713        | AK166895         | 0.000122    | 2.4677193 | up |
| ASMM9PARTA007373        |                  | 0.000142    | 2.0476632 | up |
| AV570450_P1             | humanlincRNA0329 | 0.0000147   | 2.3798816 | up |
| ASMM9PARTA006076        |                  | 0.000946    | 2.6552072 | up |
| ASMM9PARTA004840        |                  | 0.0000211   | 2.0126963 | up |
| ASMM9PARTA016906        | Gm15865          | 0.006465207 | 4.2304425 | up |
| ASMM9PARTA046895        | slc43a2          | 0.011298595 | 2.4693172 | up |
| ASMM9PARTA046895        | slc43a2          | 0.011298595 | 2.4693172 | up |
| ASMM9PARTA046895        | slc43a2          | 0.011298595 | 2.4693172 | up |
| ASMM9PARTA005435        |                  | 6.32E-08    | 19.430582 | up |
| ASMM9PARTA048214        | AK170928         | 0.000111    | 5.404855  | up |

|                         |                  |             |           |    |
|-------------------------|------------------|-------------|-----------|----|
| ASMM9PARTA048214        | AK170928         | 0.000111    | 5.404855  | up |
| ASMM9PARTA048214        | AK170928         | 0.000111    | 5.404855  | up |
| ASMM9PARTA007740        |                  | 0.0000155   | 2.8659556 | up |
| ASMM9PARTA010117        | Olfr833-ps1      | 0.025492877 | 2.1618166 | up |
| ASMM9PARTA006854        |                  | 0.001526317 | 3.472981  | up |
| ASMM9PARTA013449        | Gm15052          | 0.02267584  | 2.7453294 | up |
| ASMM9PARTA003577        |                  | 0.04269406  | 2.631562  | up |
| ASMM9PARTA050677        | AK085609         | 0.041577633 | 2.2467873 | up |
| ASMM9PARTA012852        | Gm14300          | 0.010992006 | 2.01897   | up |
| ASMM9PARTA002799        |                  | 0.000741    | 2.1187544 | up |
| MM9LINCRNAEXON11234-_P1 | mouselincRNA0719 | 0.025463864 | 2.4796512 | up |
| ASMM9PARTA003518        |                  | 0.0000173   | 3.9191155 | up |
| ASMM9PARTA011435        | Gm11877          | 0.000602    | 2.0179665 | up |
| ASMM9PARTA015623        | Gm11368          | 0.03503963  | 2.767399  | up |
| CUST_72_P1426409190     | Gm13155          | 0.00000106  | 2.655761  | up |
| ASMM9PARTA019336        | AC132234.1       | 0.0000056   | 2.7873704 | up |
| ASMM9PARTA016885        | Gm14233          | 0.014509914 | 2.607557  | up |
| ASMM9PARTA016885        | Gm14233          | 0.014509914 | 2.607557  | up |
| ASMM9PARTA015663        | Gm12462          | 0.021645095 | 3.114849  | up |
| ASMM9PARTA011869        | Gm16106          | 0.0000682   | 2.3384438 | up |
| ASMM9PARTA008845        |                  | 0.043120634 | 2.8098152 | up |
| ASMM9PARTA018622        | Gm16110          | 0.045055512 | 2.533396  | up |
| ASMM9PARTA012180        | Mup-ps17         | 0.000424    | 3.6852767 | up |
| ASMM9PARTA001716        |                  | 0.0000146   | 3.3201692 | up |
| ASMM9PARTA006533        |                  | 0.008149483 | 2.22305   | up |
| ASMM9PARTA013831        | Gm7375           | 0.008643639 | 3.4775705 | up |
| ASMM9PARTA019160        | RP24-230H12.5    | 0.0000176   | 3.2998517 | up |
| ASMM9PARTA014536        | Gm11532          | 0.004175172 | 2.7584414 | up |
| mouselincRNA1486-_P1    | mouselincRNA1486 | 0.026596203 | 2.349201  | up |
| ASMM9PARTA008097        |                  | 0.000362    | 2.104554  | up |
| ASMM9PARTA008097        |                  | 0.000362    | 2.104554  | up |
| ASMM9PARTA003674        |                  | 0.03726476  | 2.1515129 | up |
| ASMM9PARTA015858        | Gm13194          | 0.000167    | 2.112241  | up |
| MM9LINCRNAEXON11454-_P1 | mouselincRNA0481 | 0.010671058 | 3.3564527 | up |
| ASMM9PARTA048947        | Strbp            | 0.008610019 | 2.3662748 | up |
| ASMM9PARTA048947        | Strbp            | 0.008610019 | 2.3662748 | up |
| ASMM9PARTA048947        | Strbp            | 0.008610019 | 2.3662748 | up |
| ASMM9PARTA048947        | Strbp            | 0.008610019 | 2.3662748 | up |
| MM9LINCRNAEXON10665-_P1 | mouselincRNA1101 | 0.000109    | 3.4450989 | up |
| ASMM9PARTA011989        | Gm13170          | 0.0000269   | 2.4050152 | up |
| ASMM9PARTA011989        | Gm13170          | 0.0000269   | 2.4050152 | up |
| ASMM9PARTA016026        | Gm11861          | 0.00653889  | 2.2872052 | up |
| MM9LINCRNAEXON11063+_P1 | mouselincRNA0809 | 0.000421    | 4.7005215 | up |
| ASMM9PARTA016956        | Mup-ps4          | 0.00000119  | 11.556606 | up |
| ASMM9PARTA016163        | 0610005C13Rik    | 0.000184    | 4.019154  | up |
| ASMM9PARTA049374        | Etohi1           | 0.0000182   | 2.2188861 | up |
| ASMM9PARTA049374        | Etohi1           | 0.0000182   | 2.2188861 | up |
| ASMM9PARTA049374        | Etohi1           | 0.0000182   | 2.2188861 | up |
| ASMM9PARTA049374        | Etohi1           | 0.0000182   | 2.2188861 | up |

|                         |                  |             |           |    |
|-------------------------|------------------|-------------|-----------|----|
| ASMM9PARTA049374        | Etohi1           | 0.0000182   | 2.2188861 | up |
| ASMM9PARTA049374        | Etohi1           | 0.0000182   | 2.2188861 | up |
| ASMM9PARTA049374        | Etohi1           | 0.0000182   | 2.2188861 | up |
| ASMM9PARTA013034        | Gm15379          | 0.002158355 | 2.4215639 | up |
| ASMM9PARTA047583        | AK021377         | 0.0000244   | 2.4268384 | up |
| ASMM9PARTA047583        | AK021377         | 0.0000244   | 2.4268384 | up |
| ASMM9PARTA015476        | Hoxa11as         | 0.0000486   | 2.723337  | up |
| CK378914_P1             | humanlincRNA1553 | 0.039537963 | 3.2691762 | up |
| CUST_780_PI426073487    | uc.301           | 0.029574085 | 2.6782415 | up |
| ASMM9PARTA003754        |                  | 0.00011     | 3.427992  | up |
| ASMM9PARTA047727        | AK013308         | 0.0000224   | 2.8708134 | up |
| ASMM9PARTA001697        |                  | 0.023436017 | 2.993111  | up |
| ASMM9PARTA010314        | Gm12643          | 0.000466    | 2.2831063 | up |
| ASMM9PARTA012488        | Gm11283          | 0.008885544 | 3.546874  | up |
| ASMM9PARTA013211        | Gm14983          | 0.0000664   | 2.5804033 | up |
| ASMM9PARTA008101        |                  | 0.00217741  | 2.4394176 | up |
| ASMM9PARTA046977        | Prpf39           | 0.007360946 | 2.2625773 | up |
| ASMM9PARTA046977        | Prpf39           | 0.007360946 | 2.2625773 | up |
| ASMM9PARTA014892        | 5730405O15Rik    | 0.000131    | 2.2418652 | up |
| ASMM9PARTA011821        | Gm7219           | 0.00000905  | 2.0991886 | up |
| ASMM9PARTA049866        | AK052888         | 0.001548062 | 2.2319543 | up |
| mouselincRNA0238-_P1    | mouselincRNA0238 | 0.001346171 | 3.8611655 | up |
| ASMM9PARTA004413        |                  | 0.000814    | 2.0993032 | up |
| ASMM9PARTA012701        | AA413626         | 0.00369363  | 2.0243053 | up |
| ASMM9PARTA050876        | AK077481         | 0.022632372 | 2.0454216 | up |
| ASMM9PARTA004788        |                  | 0.0000122   | 27.265574 | up |
| ASMM9PARTA011129        | Gm12741          | 0.000112    | 2.0961394 | up |
| ASMM9PARTA006722        |                  | 0.01094285  | 2.8356895 | up |
| ASMM9PARTA000388        |                  | 0.000599    | 2.3450785 | up |
| ASMM9PARTA015826        | Gm15605          | 0.001950575 | 2.2574613 | up |
| ASMM9PARTA015826        | Gm15605          | 0.001950575 | 2.2574613 | up |
| ASMM9PARTA010884        | Gm15709          | 0.002347111 | 2.385834  | up |
| ASMM9PARTA017044        | BC024582         | 0.001999527 | 2.8319056 | up |
| ASMM9PARTA005191        |                  | 0.000000489 | 19.55925  | up |
| ASMM9PARTA047793        | MADP-1           | 0.000126    | 2.121295  | up |
| ASMM9PARTA047793        | MADP-1           | 0.000126    | 2.121295  | up |
| ASMM9PARTA047793        | MADP-1           | 0.000126    | 2.121295  | up |
| ASMM9PARTA047793        | MADP-1           | 0.000126    | 2.121295  | up |
| ASMM9PARTA003039        |                  | 0.0000954   | 2.2476687 | up |
| MM9LINCRNAEXON10971-_P1 |                  | 0.0000317   | 4.04571   | up |
| ASMM9PARTA010668        | Gm11905          | 0.024447275 | 3.2819102 | up |
| MM9LINCRNAEXON11511+_P1 | mouselincRNA0367 | 0.010972943 | 4.9441733 | up |
| ASMM9PARTA014765        | A530083I20Rik    | 0.003885604 | 6.2350335 | up |
| AI503337_P1             | mouselincRNA0302 | 0.015948238 | 2.035016  | up |
| ASMM9PARTA013309        | Gm14460          | 0.00023     | 2.424697  | up |
| ASMM9PARTA001201        |                  | 0.019467967 | 2.6579392 | up |
| ASMM9PARTA044984        | Dio3os           | 0.016049087 | 2.2251294 | up |
| MM9LINCRNAEXON11077+_P1 |                  | 0.00000442  | 3.0722895 | up |
| ASMM9PARTA016368        | Gm15958          | 0.014653345 | 2.0924673 | up |

|                         |                  |             |           |    |
|-------------------------|------------------|-------------|-----------|----|
| ASMM9PARTA018263        | Gm16570          | 0.000103    | 2.2948632 | up |
| ASMM9PARTA000283        |                  | 0.021953516 | 2.4303453 | up |
| ASMM9PARTA015559        | 6720401G13Rik    | 0.025047805 | 2.0965323 | up |
| ASMM9PARTA007775        |                  | 0.010432979 | 2.8922331 | up |
| ASMM9PARTA051077        | AK215526         | 0.026387833 | 2.431819  | up |
| ASMM9PARTA001427        |                  | 0.003310577 | 3.8885329 | up |
| ASMM9PARTA001427        |                  | 0.003310577 | 3.8885329 | up |
| ASMM9PARTA016737        | Gm11683          | 0.039207943 | 2.1252909 | up |
| ASMM9PARTA016737        | Gm11683          | 0.039207943 | 2.1252909 | up |
| ASMM9PARTA009332        | 4930463O16Rik    | 0.032151803 | 2.553776  | up |
| ASMM9PARTA017363        | Gm11837          | 0.0000179   | 2.3324692 | up |
| ASMM9PARTA007597        |                  | 0.000172    | 3.4272103 | up |
| MM9LINCRNAEXON10811-_P1 | mouselincRNA0961 | 0.044673372 | 2.1008406 | up |
| ASMM9PARTA015804        | Gm13189          | 0.007019602 | 3.6558638 | up |
| ASMM9PARTA044808        | Speer7-ps1       | 0.000416    | 2.006462  | up |
| ASMM9PARTA048531        | NR_003519        | 0.000141    | 2.4995687 | up |
| ASMM9PARTA013479        | Gm16479          | 0.000693    | 2.7296116 | up |
| ASMM9PARTA018563        | AC164629.6       | 0.009281689 | 2.561227  | up |
| ASMM9PARTA015237        | 5330411J11Rik    | 0.006404722 | 2.828499  | up |
| ASMM9PARTA046658        | AK030920         | 0.000308    | 2.1788116 | up |
| ASMM9PARTA046658        | AK030920         | 0.000308    | 2.1788116 | up |
| ASMM9PARTA049776        | 4933409K07Rik    | 0.0000754   | 2.578514  | up |
| ASMM9PARTA047171        | AK012841         | 0.0000144   | 2.765245  | up |
| ASMM9PARTA047171        | AK012841         | 0.0000144   | 2.765245  | up |
| CUST_429_P1426073487    | uc.431           | 0.037706435 | 2.4475033 | up |
| ASMM9PARTA009678        | Gm5135           | 0.028812699 | 5.794474  | up |
| ASMM9PARTA001946        |                  | 0.00000109  | 2.1609287 | up |
| ASMM9PARTA006005        |                  | 0.003909261 | 5.623851  | up |
| ASMM9PARTA010979        | Gm13458          | 0.002568956 | 2.0198169 | up |
| MM9LINCRNAEXON11845+_P1 | mouselincRNA0275 | 0.002253867 | 5.3943233 | up |
| ASMM9PARTA006974        |                  | 0.003849258 | 3.0626094 | up |
| ASMM9PARTA015170        | 1700042G15Rik    | 0.04111711  | 2.9537787 | up |
| ASMM9PARTA044965        | Mug-ps1          | 0.018938622 | 2.169502  | up |
| ASMM9PARTA004299        |                  | 0.01829673  | 2.5046062 | up |
| ASMM9PARTA016541        | Zfp133-ps        | 0.009836554 | 2.673169  | up |
| ASMM9PARTA048168        | AK157795         | 0.0000922   | 2.906104  | up |
| ASMM9PARTA048168        | AK157795         | 0.0000922   | 2.906104  | up |
| ASMM9PARTA003726        |                  | 0.029743275 | 2.9296398 | up |
| ASMM9PARTA018124        | Gm3470           | 0.000964    | 2.5198631 | up |
| ASMM9PARTA015212        | Gm16548          | 0.025674216 | 3.1395323 | up |
| ASMM9PARTA015212        | Gm16548          | 0.025674216 | 3.1395323 | up |
| ASMM9PARTA016822        | Gm14747          | 0.000949    | 2.7512255 | up |
| ASMM9PARTA010177        | Gm6973           | 0.000857    | 4.095665  | up |
| ASMM9PARTA017321        | 5330434G04Rik    | 0.005595785 | 2.0989368 | up |
| ASMM9PARTA002192        |                  | 0.000526    | 2.3362405 | up |
| ASMM9PARTA007514        |                  | 0.000224    | 2.1863723 | up |
| ASMM9PARTA018967        | AC159205.1       | 0.002297188 | 2.7751563 | up |
| ASMM9PARTA004773        |                  | 0.0000678   | 3.3029537 | up |
| ASMM9PARTA048470        | BC096411         | 0.017798696 | 2.4458632 | up |

|                         |                  |             |           |    |
|-------------------------|------------------|-------------|-----------|----|
| DV650143_P1             | mouselincRNA1440 | 0.004753044 | 2.2532213 | up |
| ASMM9PARTA013751        | Mup-ps8          | 0.00006     | 8.858889  | up |
| ASMM9PARTA048046        | BC098222         | 0.006436714 | 2.3191826 | up |
| ASMM9PARTA003818        |                  | 0.019369354 | 2.469514  | up |
| ASMM9PARTA017664        | 4921508A21Rik    | 0.018799689 | 2.4309752 | up |
| ASMM9PARTA014507        | Gm15941          | 0.019537766 | 2.440631  | up |
| ASMM9PARTA014507        | Gm15941          | 0.019537766 | 2.440631  | up |
| ASMM9PARTA014507        | Gm15941          | 0.019537766 | 2.440631  | up |
| ASMM9PARTA014507        | Gm15941          | 0.019537766 | 2.440631  | up |
| mouselincRNA0365-_P1    | mouselincRNA0365 | 0.014068429 | 3.0238342 | up |
| ASMM9PARTA006236        |                  | 0.003242792 | 2.4778924 | up |
| ASMM9PARTA046159        | Ankrd11          | 0.016949203 | 2.2631643 | up |
| ASMM9PARTA045479        | Gm13629          | 0.000178    | 2.8826463 | up |
| ASMM9PARTA045479        | Gm13629          | 0.000178    | 2.8826463 | up |
| MM9LINCRNAEXON11640+_P1 | mouselincRNA0450 | 0.005615351 | 2.586318  | up |
| ASMM9PARTA009282        |                  | 0.000456    | 4.7056136 | up |
| ASMM9PARTA000539        |                  | 0.000000221 | 5.009665  | up |
| ASMM9PARTA010158        | Gm5532           | 0.000214    | 2.0082514 | up |
| ASMM9PARTA015391        | C030037D09Rik    | 0.000000605 | 17.239882 | up |
| ASMM9PARTA015391        | C030037D09Rik    | 0.000000605 | 17.239882 | up |
| MM9LINCRNAEXON10854-_P1 | mouselincRNA1008 | 0.045372102 | 2.189518  | up |
| ASMM9PARTA012588        | Gm15224          | 0.0000362   | 2.48759   | up |
| ASMM9PARTA050500        | AK044653         | 0.0000138   | 2.0939777 | up |
| ASMM9PARTA017687        | 4930522O17Rik    | 0.003809092 | 2.0728438 | up |
| ASMM9PARTA010353        | Gm14886          | 0.025164222 | 4.0286784 | up |
| MM9LINCRNAEXON11156-_P1 |                  | 0.007178091 | 2.4582517 | up |
| MM9LINCRNAEXON10120-_P1 | mouselincRNA1557 | 0.029470466 | 2.294069  | up |
| ASMM9PARTA007824        |                  | 0.000135    | 5.0431075 | up |
| ASMM9PARTA007824        |                  | 0.000135    | 5.0431075 | up |
| ASMM9PARTA007824        |                  | 0.000135    | 5.0431075 | up |
| ASMM9PARTA007824        |                  | 0.000135    | 5.0431075 | up |
| ASMM9PARTA006592        |                  | 0.00000802  | 2.1025412 | up |
| ASMM9PARTA005318        |                  | 0.005187639 | 2.2597253 | up |
| ASMM9PARTA006561        |                  | 0.000208    | 3.0838203 | up |
| ASMM9PARTA012053        | Gm11469          | 0.000111    | 2.0296926 | up |
| ASMM9PARTA013708        | Gm13591          | 0.000228    | 2.8590877 | up |
| ASMM9PARTA013708        | Gm13591          | 0.000228    | 2.8590877 | up |
| ASMM9PARTA013708        | Gm13591          | 0.000228    | 2.8590877 | up |
| ASMM9PARTA049271        | BC085231         | 0.0000535   | 2.3479714 | up |
| ASMM9PARTA010524        | Gm15161          | 0.023131208 | 2.8052366 | up |
| ASMM9PARTA049447        | Cetn4            | 0.00011     | 2.357526  | up |
| ASMM9PARTA017541        | A230087F16Rik    | 0.0000138   | 14.316176 | up |
| ASMM9PARTA003233        |                  | 0.000822    | 2.0655158 | up |
| ASMM9PARTA050716        | AK036949         | 0.001851368 | 2.0126505 | up |
| ASMM9PARTA012521        | Gm12329          | 0.014312104 | 2.4452667 | up |
| ASMM9PARTA006006        |                  | 1.64E-08    | 15.571929 | up |
| ASMM9PARTA004899        |                  | 0.0000374   | 8.867676  | up |
| MM9LINCRNAEXON10979-_P1 | mouselincRNA0870 | 0.00144868  | 4.3862224 | up |
| ASMM9PARTA001684        |                  | 0.00000401  | 2.6117725 | up |

|                         |                  |             |           |    |
|-------------------------|------------------|-------------|-----------|----|
| ASMM9PARTA017205        | 4930511M06Rik    | 0.008154828 | 2.2770941 | up |
| ASMM9PARTA051308        | AK038653         | 0.001074239 | 3.2058306 | up |
| MM9LINCRNAEXON10035-_P1 | mouselincRNA1646 | 0.001899102 | 2.2003012 | up |
| ASMM9PARTA046090        | AK079804         | 0.000139    | 2.1687758 | up |
| MM9LINCRNAEXON12071-_P1 | mouselincRNA0095 | 0.02435267  | 2.3835924 | up |
| ASMM9PARTA051329        | AK076318         | 0.00848008  | 2.6944587 | up |
| humanlincRNA2106+_P1    | humanlincRNA2106 | 0.016507933 | 2.11366   | up |
| CUST_196_PI426073487    | uc.198           | 0.001196752 | 2.2389858 | up |
| ASMM9PARTA015795        | 3110053B16Rik    | 0.000304    | 17.447605 | up |
| ASMM9PARTA019148        | RP23-131B11.2    | 0.019360963 | 2.473327  | up |
| ASMM9PARTA007351        |                  | 0.044408884 | 2.2335773 | up |
| ASMM9PARTA007351        |                  | 0.044408884 | 2.2335773 | up |
| ASMM9PARTA045799        | Gm6607           | 0.000134    | 2.5401933 | up |
| ASMM9PARTA000082        |                  | 0.00000713  | 3.3611763 | up |
| ASMM9PARTA000151        |                  | 0.0000979   | 2.4393134 | up |
| ASMM9PARTA004652        |                  | 0.030589186 | 2.3324573 | up |
| ASMM9PARTA019226        | Gm16759          | 0.001250253 | 4.860738  | up |
| ASMM9PARTA002317        |                  | 0.019190772 | 4.3123827 | up |
| MM9LINCRNAEXON10047+_P1 | mouselincRNA1651 | 0.04755336  | 3.226252  | up |
| ASMM9PARTA012440        | Mup-ps9          | 0.0000544   | 5.0800457 | up |
| ASMM9PARTA045611        | Gm8989           | 0.0000122   | 2.1922016 | up |
| ASMM9PARTA016310        | Gm12868          | 0.003230158 | 3.039776  | up |
| MM9LINCRNAEXON11616+_P1 | mouselincRNA0430 | 0.03553728  | 5.394965  | up |
| ASMM9PARTA046527        | AK016383         | 0.00963778  | 3.4179327 | up |
| ASMM9PARTA051686        | Gprasp1          | 0.00000601  | 2.4669201 | up |
| ASMM9PARTA051686        | Gprasp1          | 0.00000601  | 2.4669201 | up |
| ASMM9PARTA051686        | Gprasp1          | 0.00000601  | 2.4669201 | up |
| ASMM9PARTA051686        | Gprasp1          | 0.00000601  | 2.4669201 | up |
| ASMM9PARTA051686        | Gprasp1          | 0.00000601  | 2.4669201 | up |
| ASMM9PARTA019822        | AC152063.3       | 0.0000015   | 4.327241  | up |
| ASMM9PARTA018077        | Gas5             | 0.00000113  | 2.639842  | up |
| ASMM9PARTA010736        | Gm11380          | 0.000326    | 3.1712265 | up |
| ASMM9PARTA011938        | Hmgb1-ps1        | 0.0000165   | 2.4225085 | up |
| ASMM9PARTA012466        | Gm4992           | 0.040913377 | 2.4308543 | up |
| ASMM9PARTA047127        | ISG12a           | 0.000535    | 2.2497191 | up |
| ASMM9PARTA047127        | ISG12a           | 0.000535    | 2.2497191 | up |
| ASMM9PARTA047127        | ISG12a           | 0.000535    | 2.2497191 | up |
| ASMM9PARTA047127        | ISG12a           | 0.000535    | 2.2497191 | up |
| ASMM9PARTA047127        | ISG12a           | 0.000535    | 2.2497191 | up |
| ASMM9PARTA012206        | Mup-ps18         | 0.004230593 | 2.0759668 | up |
| ASMM9PARTA049649        | 2210012G02Rik    | 0.005834688 | 3.7912464 | up |
| ASMM9PARTA049649        | 2210012G02Rik    | 0.005834688 | 3.7912464 | up |
| AA791803_P1             | mouselincRNA0980 | 0.000158    | 4.209043  | up |
| ASMM9PARTA003122        |                  | 0.000017    | 4.562548  | up |
| ASMM9PARTA049855        | AK019690         | 0.0000574   | 2.2752028 | up |
| ASMM9PARTA019366        | AC137708.1       | 0.0000925   | 3.10873   | up |
| ASMM9PARTA019568        | RP23-97D14.2     | 0.001179426 | 3.5288062 | up |
| MM9LINCRNAEXON11627-_P1 |                  | 0.004710208 | 2.3805652 | up |
| ASMM9PARTA050126        | AK019631         | 0.00000754  | 3.6911464 | up |
| ASMM9PARTA005934        |                  | 0.011721495 | 2.0523357 | up |



|                         |                  |             |           |    |
|-------------------------|------------------|-------------|-----------|----|
| ASMM9PARTA004622        |                  | 0.016235739 | 2.7310739 | up |
| ASMM9PARTA046236        | A730008H23Rik    | 0.000412    | 6.9144487 | up |
| ASMM9PARTA046236        | A730008H23Rik    | 0.000412    | 6.9144487 | up |
| ASMM9PARTA014967        | 6430628N08Rik    | 0.000497    | 2.2486057 | up |
| ASMM9PARTA004138        |                  | 0.001068032 | 2.472599  | up |
| ASMM9PARTA011360        | Gm14466          | 0.017476412 | 2.4162133 | up |
| ASMM9PARTA004223        |                  | 0.00000158  | 2.1865516 | up |
| ASMM9PARTA002658        |                  | 0.017831042 | 2.0186336 | up |
| CK377992_P1             | humanlincRNA1344 | 0.027192576 | 2.3351774 | up |
| ASMM9PARTA002944        |                  | 0.035084255 | 2.1090152 | up |
| ASMM9PARTA002108        |                  | 0.0000378   | 2.2845912 | up |
| ASMM9PARTA049481        | Etohi1           | 0.000243    | 2.1015198 | up |
| ASMM9PARTA049481        | Etohi1           | 0.000243    | 2.1015198 | up |
| ASMM9PARTA049481        | Etohi1           | 0.000243    | 2.1015198 | up |
| ASMM9PARTA049481        | Etohi1           | 0.000243    | 2.1015198 | up |
| ASMM9PARTA049481        | Etohi1           | 0.000243    | 2.1015198 | up |
| ASMM9PARTA049481        | Etohi1           | 0.000243    | 2.1015198 | up |
| ASMM9PARTA049481        | Etohi1           | 0.000243    | 2.1015198 | up |
| ASMM9PARTA049481        | Etohi1           | 0.000243    | 2.1015198 | up |
| ASMM9PARTA049481        | Etohi1           | 0.000243    | 2.1015198 | up |
| ASMM9PARTA049481        | Etohi1           | 0.000243    | 2.1015198 | up |
| ASMM9PARTA049481        | Etohi1           | 0.000243    | 2.1015198 | up |
| ASMM9PARTA049481        | Etohi1           | 0.000243    | 2.1015198 | up |
| ASMM9PARTA049481        | Etohi1           | 0.000243    | 2.1015198 | up |
| ASMM9PARTA009045        |                  | 0.020251706 | 2.6574764 | up |
| ASMM9PARTA044906        | 2410002O22Rik    | 0.00000316  | 4.917222  | up |
| ASMM9PARTA044906        | 2410002O22Rik    | 0.00000316  | 4.917222  | up |
| ASMM9PARTA044906        | 2410002O22Rik    | 0.00000316  | 4.917222  | up |
| ASMM9PARTA044906        | 2410002O22Rik    | 0.00000316  | 4.917222  | up |
| MM9LINCRNAEXON10048-_P1 |                  | 0.005635168 | 2.594016  | up |
| ASMM9PARTA002149        |                  | 0.0000328   | 2.0522332 | up |
| ASMM9PARTA002446        |                  | 0.015533558 | 2.6028762 | up |
| CUST_365_PI426073487    | uc.367           | 0.0000141   | 2.2055771 | up |
| ASMM9PARTA015029        | Gm16233          | 0.000738    | 5.030052  | up |
| ASMM9PARTA000260        |                  | 0.003679409 | 2.5219154 | up |
| ASMM9PARTA000260        |                  | 0.003679409 | 2.5219154 | up |
| ASMM9PARTA048510        | AK161769         | 0.001542412 | 2.0662546 | up |
| ASMM9PARTA049539        | AK076677         | 0.0000201   | 2.4637682 | up |
| ASMM9PARTA011651        | Gm11881          | 0.000721    | 2.3493764 | up |
| ASMM9PARTA012216        | Gm13118          | 0.0000554   | 4.0120564 | up |
| ASMM9PARTA009396        | Gm16373          | 0.000826    | 2.080701  | up |
| ASMM9PARTA045585        | Gm839            | 0.021356562 | 2.228997  | up |
| ASMM9PARTA016669        | Gm16211          | 0.01741969  | 3.3444524 | up |
| ASMM9PARTA051758        | AK159035         | 0.001567319 | 11.803876 | up |
| MM9LINCRNAEXON10124+_P1 | mouselincRNA1558 | 0.001390586 | 2.6133294 | up |
| ASMM9PARTA050616        | AK049852         | 0.0000644   | 4.249902  | up |
| ASMM9PARTA009548        | Gm8556           | 0.0000274   | 3.4742818 | up |
| ASMM9PARTA002598        |                  | 0.000755    | 2.546513  | up |
| ASMM9PARTA000813        |                  | 0.001190985 | 2.1826582 | up |
| ASMM9PARTA005122        |                  | 0.000000645 | 4.7228146 | up |

|                         |                  |             |           |    |
|-------------------------|------------------|-------------|-----------|----|
| CUST_946_PI426073487    | uc.467           | 0.04952777  | 3.0639296 | up |
| ASMM9PARTA016359        | Gm7546           | 0.041623604 | 2.7077355 | up |
| ASMM9PARTA013307        | Sh3d2c-ps1       | 0.000058    | 2.0040734 | up |
| ASMM9PARTA013288        | Gm15877          | 0.003824441 | 2.5225005 | up |
| ASMM9PARTA010960        | Gm14987          | 0.032874588 | 2.4844484 | up |
| ASMM9PARTA018523        | Airn             | 0.000000039 | 30.692284 | up |
| MM9LINCRNAEXON10694-_P1 | mouselincRNA1113 | 0.011640612 | 2.0307622 | up |
| ASMM9PARTA005165        |                  | 0.014309723 | 3.6635392 | up |
| ASMM9PARTA004351        |                  | 0.0000214   | 2.6030142 | up |
| ASMM9PARTA015549        | A830036E02Rik    | 0.016751433 | 4.167666  | up |
| ASMM9PARTA002442        |                  | 0.00967922  | 2.2064419 | up |
| ASMM9PARTA009181        |                  | 0.038325503 | 2.0786164 | up |
| ASMM9PARTA009181        |                  | 0.038325503 | 2.0786164 | up |
| ASMM9PARTA009181        |                  | 0.038325503 | 2.0786164 | up |
| ASMM9PARTA009181        |                  | 0.038325503 | 2.0786164 | up |
| ASMM9PARTA009181        |                  | 0.038325503 | 2.0786164 | up |
| ASMM9PARTA047307        | 1300014I06Rik    | 0.002641702 | 2.3888183 | up |
| ASMM9PARTA045392        | Airn             | 0.0000256   | 2.243639  | up |
| ASMM9PARTA045392        | Airn             | 0.0000256   | 2.243639  | up |
| ASMM9PARTA048548        | AK079730         | 0.001127711 | 2.1647818 | up |
| MM9LINCRNAEXON10998-_P1 | mouselincRNA0882 | 0.015723212 | 3.3525438 | up |
| ASMM9PARTA051664        | Trip4            | 0.000879    | 4.542469  | up |
| ASMM9PARTA051664        | Trip4            | 0.000879    | 4.542469  | up |
| ASMM9PARTA051664        | Trip4            | 0.000879    | 4.542469  | up |
| ASMM9PARTA002580        |                  | 0.0000112   | 2.297891  | up |
| ASMM9PARTA013480        | Gm13024          | 1.51E-08    | 2.6485834 | up |
| ASMM9PARTA050025        | nssr 1           | 0.00000199  | 3.2862563 | up |
| ASMM9PARTA050025        | nssr 1           | 0.00000199  | 3.2862563 | up |
| ASMM9PARTA003955        |                  | 0.000233    | 2.1015546 | up |
| ASMM9PARTA049316        | AK041310         | 0.007011698 | 2.3175473 | up |
| ASMM9PARTA049316        | AK041310         | 0.007011698 | 2.3175473 | up |
| ASMM9PARTA049316        | AK041310         | 0.007011698 | 2.3175473 | up |
| BF787814_P1             | mouselincRNA0498 | 0.005410496 | 2.292607  | up |
| ASMM9PARTA019016        | RP24-357O21.3    | 0.000107    | 3.0634668 | up |
| mouselincRNA0963-_P1    | mouselincRNA0963 | 0.02520888  | 2.1265574 | up |
| ASMM9PARTA012429        | Gm12587          | 0.00000843  | 2.5660658 | up |
| humanlincRNA0055-_P1    | humanlincRNA0055 | 0.002467079 | 2.166897  | up |
| ASMM9PARTA006085        |                  | 0.000545    | 2.6730473 | up |
| ASMM9PARTA006085        |                  | 0.000545    | 2.6730473 | up |
| ASMM9PARTA010972        | Mup-ps6          | 0.0000161   | 4.022564  | up |
| ASMM9PARTA019098        | AC121792.3       | 0.033514142 | 2.2735584 | up |
| ASMM9PARTA007353        |                  | 0.042540945 | 2.275102  | up |
| ASMM9PARTA001194        |                  | 0.002265764 | 2.494671  | up |
| MM9LINCRNAEXON12018-_P1 | mouselincRNA0031 | 0.001699114 | 2.0568318 | up |
| ASMM9PARTA044839        | Vmn2r-ps14       | 0.029846843 | 4.0783963 | up |
| ASMM9PARTA049975        | AK043904         | 0.0000207   | 2.6258962 | up |
| ASMM9PARTA049688        | AK145113         | 0.014496135 | 2.06082   | up |
| ASMM9PARTA018606        | RP23-126F14.6    | 0.0000202   | 6.4950004 | up |
| ASMM9PARTA004654        |                  | 0.006798118 | 2.5093179 | up |

|                          |                  |             |           |    |
|--------------------------|------------------|-------------|-----------|----|
| humanlincRNA1385- _P1    | humanlincRNA1385 | 0.0000319   | 3.433167  | up |
| ASMM9PARTA013365         | Gm11341          | 0.0000144   | 2.271584  | up |
| ASMM9PARTA051782         | AK142198         | 0.000049    | 3.3818111 | up |
| ASMM9PARTA051782         | AK142198         | 0.000049    | 3.3818111 | up |
| ASMM9PARTA051782         | AK142198         | 0.000049    | 3.3818111 | up |
| ASMM9PARTA051782         | AK142198         | 0.000049    | 3.3818111 | up |
| ASMM9PARTA051782         | AK142198         | 0.000049    | 3.3818111 | up |
| ASMM9PARTA010242         | Gm13303          | 0.000153    | 4.23593   | up |
| ASMM9PARTA008632         |                  | 0.007488906 | 2.1066258 | up |
| ASMM9PARTA006527         |                  | 0.002830179 | 2.5977042 | up |
| ASMM9PARTA012197         | Gm12331          | 0.00000216  | 2.7013195 | up |
| ASMM9PARTA047146         | AK087290         | 0.008651675 | 2.5153308 | up |
| ASMM9PARTA047146         | AK087290         | 0.008651675 | 2.5153308 | up |
| AV290481- _P1            | humanlincRNA2040 | 0.001539665 | 2.069698  | up |
| ASMM9PARTA002907         |                  | 0.01911226  | 2.2169294 | up |
| ASMM9PARTA009998         | 4632427E13Rik    | 0.0000324   | 2.0722952 | up |
| ASMM9PARTA007196         |                  | 0.002476982 | 2.7026877 | up |
| ASMM9PARTA005873         |                  | 0.000387    | 2.5644972 | up |
| ASMM9PARTA016340         | BC006965         | 0.002563251 | 3.8890753 | up |
| ASMM9PARTA047011         | AK163447         | 0.003627984 | 3.3370185 | up |
| MM9LINCRNAEXON11933- _P1 | mouselincRNA0196 | 0.019213183 | 2.75035   | up |
| MM9LINCRNAEXON10980- _P1 | mouselincRNA0870 | 0.040502742 | 2.7829013 | up |
| ASMM9PARTA013866         | 4930455G09Rik    | 0.000157    | 3.1369178 | up |
| ASMM9PARTA047100         | AK005722         | 0.012690729 | 3.3796914 | up |
| ASMM9PARTA047100         | AK005722         | 0.012690729 | 3.3796914 | up |
| ASMM9PARTA010799         | Gm4919           | 0.001001884 | 2.0900185 | up |
| MM9LINCRNAEXON10348- _P1 | mouselincRNA1396 | 0.000156    | 2.016701  | up |
| ASMM9PARTA003188         |                  | 0.000343    | 2.025452  | up |
| ASMM9PARTA003188         |                  | 0.000343    | 2.025452  | up |
| ASMM9PARTA046645         | IL-TIFb          | 0.0000524   | 4.7472396 | up |
| ASMM9PARTA014593         | Gm15169          | 0.000143    | 3.8509307 | up |
| ASMM9PARTA013056         | Gm14143          | 0.000487    | 2.3145373 | up |
| ASMM9PARTA009944         | Gm10075          | 0.0000234   | 2.6519034 | up |
| humanlincRNA1016- _P1    | humanlincRNA1016 | 0.0000528   | 2.2864692 | up |
| ASMM9PARTA010113         | Hsp25-ps1        | 0.00035     | 3.3957517 | up |
| ASMM9PARTA049247         | AK040741         | 0.012025277 | 3.1804085 | up |
| MM9LINCRNAEXON10743- _P1 | mouselincRNA1136 | 0.003954184 | 3.8251135 | up |
| ASMM9PARTA007248         |                  | 0.005026355 | 3.4147952 | up |
| ASMM9PARTA013839         | 9330185C12Rik    | 0.026189921 | 2.1763446 | up |
| ASMM9PARTA047150         | AK019365         | 0.00000601  | 2.724738  | up |
| ASMM9PARTA012029         | Gm13823          | 0.006309441 | 2.0960474 | up |
| ASMM9PARTA049465         | DQ697944         | 0.017790703 | 2.5509765 | up |
| ASMM9PARTA001889         |                  | 0.0000285   | 3.873282  | up |
| ASMM9PARTA002853         |                  | 0.00000522  | 2.934644  | up |
| ASMM9PARTA002853         |                  | 0.00000522  | 2.934644  | up |
| ASMM9PARTA002853         |                  | 0.00000522  | 2.934644  | up |
| ASMM9PARTA011809         | Gm13302          | 0.000000181 | 4.4235177 | up |
| ASMM9PARTA003783         |                  | 0.000389    | 2.087983  | up |
| MM9LINCRNAEXON10136+ _P1 | mouselincRNA1563 | 0.000027    | 3.0390553 | up |

|                         |                  |             |           |    |
|-------------------------|------------------|-------------|-----------|----|
| ASMM9PARTA014155        | 9330111N05Rik    | 0.000139    | 11.575967 | up |
| ASMM9PARTA011466        | Gm14874          | 0.000701    | 2.2405474 | up |
| CUST_910_PI426073487    | uc.431           | 0.04850129  | 2.2293694 | up |
| ASMM9PARTA048130        | Trhr             | 0.001019991 | 2.0016923 | up |
| MM9LINCRNAEXON10474+_P1 | mouselincRNA1297 | 0.020328147 | 2.9579363 | up |
| ASMM9PARTA005229        |                  | 0.00000227  | 28.594591 | up |
| ASMM9PARTA048564        | AK009785         | 0.03720002  | 3.1501374 | up |
| ASMM9PARTA050840        | AK050360         | 0.000423    | 2.505112  | up |
| ASMM9PARTA010591        | Gm12131          | 0.000121    | 3.5433466 | up |
| ASMM9PARTA011266        | Gm12311          | 0.000151    | 2.9004962 | up |
| ASMM9PARTA051813        | Cdcp1            | 0.0000137   | 2.7459238 | up |
| ASMM9PARTA017061        | Gm7809           | 0.000413    | 2.185241  | up |
| ASMM9PARTA019500        | AC133517.1       | 0.002038022 | 3.314145  | up |
| ASMM9PARTA004792        |                  | 0.005439912 | 2.7279453 | up |
| ASMM9PARTA015228        | Gm12576          | 0.004371155 | 4.1432953 | up |
| ASMM9PARTA047058        | Rtn-1A           | 0.006999876 | 2.5087316 | up |
| ASMM9PARTA047058        | Rtn-1A           | 0.006999876 | 2.5087316 | up |
| MM9LINCRNAEXON12111+_P1 | mouselincRNA0122 | 0.007135308 | 2.1534543 | up |
| ASMM9PARTA049940        | DQ687153         | 0.000000968 | 2.0144653 | up |
| ASMM9PARTA051687        | AK208404         | 0.002799554 | 2.5060854 | up |
| ASMM9PARTA051687        | AK208404         | 0.002799554 | 2.5060854 | up |
| ASMM9PARTA051687        | AK208404         | 0.002799554 | 2.5060854 | up |
| ASMM9PARTA012560        | Gm8152           | 0.00000838  | 3.2602935 | up |
| MM9LINCRNAEXON11832+_P1 |                  | 0.0000489   | 3.6160138 | up |
| ASMM9PARTA016151        | Gm15704          | 0.00006     | 3.672915  | up |
| ASMM9PARTA011885        | Gm15607          | 0.0000306   | 2.0043821 | up |
| ASMM9PARTA051133        | AK162666         | 0.00388528  | 2.1561172 | up |
| ASMM9PARTA011914        | Gm12757          | 0.000186    | 2.0429502 | up |
| ASMM9PARTA016414        | 3110053B16Rik    | 0.00000497  | 3.0861878 | up |
| ASMM9PARTA009310        |                  | 0.000121    | 2.0006466 | up |
| CUST_115_PI426073487    | uc.117           | 0.005279679 | 2.0733721 | up |
| ASMM9PARTA017746        | Gm12406          | 0.000462    | 3.0414312 | up |
| MM9LINCRNAEXON11100-_P1 |                  | 0.00000391  | 4.5987887 | up |
| ASMM9PARTA051103        | AK076954         | 0.00000596  | 3.782889  | up |
| ASMM9PARTA003989        |                  | 0.008304258 | 2.4503531 | up |
| ASMM9PARTA015857        | Gm16098          | 0.006875705 | 3.8277466 | up |
| ASMM9PARTA019156        | RP24-391B9.1     | 0.000496    | 3.6533327 | up |
| ASMM9PARTA002182        |                  | 0.000104    | 2.4740412 | up |
| ASMM9PARTA009208        |                  | 0.0000104   | 3.987226  | up |
| ASMM9PARTA009208        |                  | 0.0000104   | 3.987226  | up |
| ASMM9PARTA050441        | AK040808         | 0.009551179 | 2.5817962 | up |
| ASMM9PARTA050441        | AK040808         | 0.009551179 | 2.5817962 | up |
| ASMM9PARTA017258        | D830026I12Rik    | 0.023657888 | 3.1213667 | up |
| MM9LINCRNAEXON11819+_P1 | mouselincRNA0268 | 0.000732    | 2.1125832 | up |
| ASMM9PARTA046687        | AK040172         | 0.037222065 | 2.3282819 | up |
| ASMM9PARTA046687        | AK040172         | 0.037222065 | 2.3282819 | up |
| ASMM9PARTA002287        |                  | 0.023207642 | 2.875669  | up |
| ASMM9PARTA010091        | Speer4c          | 0.016464226 | 3.7602234 | up |
| ASMM9PARTA015043        | Gm15751          | 0.019191118 | 2.1902726 | up |

|                         |                  |             |           |    |
|-------------------------|------------------|-------------|-----------|----|
| ASMM9PARTA015043        | Gm15751          | 0.019191118 | 2.1902726 | up |
| ASMM9PARTA006843        |                  | 0.0000043   | 2.4403582 | up |
| ASMM9PARTA003909        |                  | 0.030186526 | 2.0060174 | up |
| ASMM9PARTA009504        | 1700018A04Rik    | 0.035345774 | 2.1170304 | up |
| ASMM9PARTA014677        | A830036E02Rik    | 0.000272    | 72.04179  | up |
| CUST_475_PI426073487    | uc.477           | 0.000165    | 2.1766112 | up |
| ASMM9PARTA049899        | C230055K05Rik    | 0.000434    | 3.43939   | up |
| ASMM9PARTA013104        | Gm14732          | 0.000757    | 2.1510677 | up |
| ASMM9PARTA003355        |                  | 0.0000737   | 3.0531328 | up |
| ASMM9PARTA048523        | Sil1             | 0.004610907 | 5.801971  | up |
| ASMM9PARTA002760        |                  | 0.04423434  | 2.1806612 | up |
| ASMM9PARTA047428        | 1700049E17Rik    | 0.000203    | 2.021194  | up |
| ASMM9PARTA012505        | Gm10601          | 0.000000231 | 8.00714   | up |
| CUST_160_PI426409190    |                  | 0.010918572 | 2.4761918 | up |
| mouselincRNA0344+_P1    | mouselincRNA0344 | 0.0000191   | 2.8268309 | up |
| ASMM9PARTA014359        | Gm12648          | 0.010400829 | 2.5174477 | up |
| ASMM9PARTA008936        |                  | 0.000466    | 2.3162975 | up |
| ASMM9PARTA015458        | A230087F16Rik    | 0.00000393  | 3.058178  | up |
| ASMM9PARTA007503        |                  | 0.047567993 | 2.0747998 | up |
| ASMM9PARTA018983        | AL606528.1       | 0.00035     | 4.073817  | up |
| ASMM9PARTA011035        | Gm12445          | 0.034812786 | 2.8441324 | up |
| ASMM9PARTA018865        | Gm6490           | 0.000288    | 2.0393522 | up |
| MM9LINCRNAEXON10522+_P1 | mouselincRNA1351 | 0.006218692 | 2.1970863 | up |
| ASMM9PARTA011263        | Gm12832          | 0.005363323 | 2.55853   | up |
| ASMM9PARTA006044        |                  | 0.0000579   | 4.022443  | up |
| MM9LINCRNAEXON11785-_P1 |                  | 0.025044193 | 2.106627  | up |
| ASMM9PARTA019007        | RP24-284A21.1    | 0.005916194 | 2.312445  | up |
| MM9LINCRNAEXON11828+_P1 | mouselincRNA0271 | 0.016319588 | 2.0236769 | up |
| ASMM9PARTA011632        | Gm15484          | 0.0000113   | 2.0514188 | up |
| ASMM9PARTA046930        | AK018772         | 0.00000751  | 2.3355148 | up |
| ASMM9PARTA007292        |                  | 0.002100656 | 3.75971   | up |
| ASMM9PARTA007292        |                  | 0.002100656 | 3.75971   | up |
| ASMM9PARTA007292        |                  | 0.002100656 | 3.75971   | up |
| ASMM9PARTA012573        | Gm7571           | 0.011855153 | 3.0073943 | up |
| ASMM9PARTA012893        | Hmgb1-ps5        | 0.00000696  | 2.9856458 | up |
| ASMM9PARTA019819        | RP23-122J17.9    | 0.000017    | 5.8084054 | up |
| ASMM9PARTA045780        | 9330020H09Rik    | 0.00025     | 3.1872258 | up |
| ASMM9PARTA010608        | Gm14448          | 0.005900046 | 2.00024   | up |
| ASMM9PARTA007306        |                  | 0.001683497 | 2.8407989 | up |
| ASMM9PARTA016175        | 5830428H23Rik    | 0.00093     | 3.1199622 | up |
| ASMM9PARTA002749        |                  | 0.001053289 | 5.264673  | up |
| ASMM9PARTA010688        | Gm15059          | 0.0000249   | 3.045087  | up |
| ASMM9PARTA011117        | Zfp389           | 0.000338    | 2.0679224 | up |
| ASMM9PARTA005625        |                  | 0.00000487  | 4.1940975 | up |
| ASMM9PARTA005625        |                  | 0.00000487  | 4.1940975 | up |
| ASMM9PARTA005625        |                  | 0.00000487  | 4.1940975 | up |
| ASMM9PARTA016813        | D430040D24Rik    | 0.00000114  | 9.755448  | up |
| ASMM9PARTA016813        | D430040D24Rik    | 0.00000114  | 9.755448  | up |
| ASMM9PARTA016813        | D430040D24Rik    | 0.00000114  | 9.755448  | up |

|                         |                  |             |           |    |
|-------------------------|------------------|-------------|-----------|----|
| ASMM9PARTA046016        | Olfr856-ps1      | 0.002315608 | 4.6385484 | up |
| ASMM9PARTA018017        | Gm16169          | 0.029165156 | 2.3030307 | up |
| ASMM9PARTA009000        |                  | 0.000111    | 3.9146273 | up |
| ASMM9PARTA049978        | Mup1             | 0.0000106   | 5.7322636 | up |
| ASMM9PARTA047303        | Heatr1           | 0.042350072 | 2.6235144 | up |
| ASMM9PARTA047303        | Heatr1           | 0.042350072 | 2.6235144 | up |
| ASMM9PARTA047303        | Heatr1           | 0.042350072 | 2.6235144 | up |
| ASMM9PARTA046691        | AK158612         | 0.001038566 | 9.658383  | up |
| ASMM9PARTA049380        | AK039272         | 0.0000337   | 2.2423038 | up |
| ASMM9PARTA002955        |                  | 0.0000219   | 2.086599  | up |
| ASMM9PARTA003150        |                  | 0.00000548  | 2.819932  | up |
| ASMM9PARTA045252        | 1700086O06Rik    | 0.0000219   | 2.1372287 | up |
| ASMM9PARTA003905        |                  | 0.00000118  | 2.6994221 | up |
| ASMM9PARTA006118        |                  | 0.000000159 | 2.2417    | up |
| ASMM9PARTA006118        |                  | 0.000000159 | 2.2417    | up |
| MM9LINCRNAEXON10071+_P1 | mouselincRNA1506 | 0.0000204   | 2.583075  | up |
| ASMM9PARTA009337        | H1f0             | 0.00014     | 2.0743325 | up |
| DV645173_P1             | humanlincRNA0146 | 4.32E-08    | 3.0676453 | up |
| ASMM9PARTA013232        | Gm15570          | 0.000216    | 2.0401762 | up |
| ASMM9PARTA004884        |                  | 0.0000649   | 2.125914  | up |
| ASMM9PARTA012278        | Gm15794          | 0.011537045 | 2.8566773 | up |
| ASMM9PARTA003161        |                  | 0.013103615 | 2.4388435 | up |
| ASMM9PARTA007109        |                  | 0.006785432 | 2.0615892 | up |
| ASMM9PARTA047833        | AK142028         | 0.0000204   | 3.225097  | up |
| ASMM9PARTA047833        | AK142028         | 0.0000204   | 3.225097  | up |
| ASMM9PARTA010702        | Gm9850           | 0.003652586 | 2.4966033 | up |
| ASMM9PARTA014203        | A230059L01Rik    | 0.01500843  | 3.5056098 | up |
| ASMM9PARTA014203        | A230059L01Rik    | 0.01500843  | 3.5056098 | up |
| ASMM9PARTA045485        | BC024582         | 0.041472863 | 2.1599445 | up |
| ASMM9PARTA002496        |                  | 0.004153596 | 3.3635817 | up |
| ASMM9PARTA002496        |                  | 0.004153596 | 3.3635817 | up |
| ASMM9PARTA048866        | AK052627         | 0.000263    | 2.1936817 | up |
| ASMM9PARTA018767        | Gm16558          | 0.005763229 | 2.4630747 | up |
| ASMM9PARTA007427        |                  | 0.000152    | 15.231653 | up |
| ASMM9PARTA049015        | AK052812         | 0.005637396 | 2.6731706 | up |
| ASMM9PARTA010939        | Gm15264          | 0.000214    | 3.7721858 | up |
| ASMM9PARTA001980        |                  | 0.004348782 | 3.3548255 | up |
| ASMM9PARTA048619        | AK043286         | 0.000325    | 2.0171144 | up |
| ASMM9PARTA048619        | AK043286         | 0.000325    | 2.0171144 | up |
| ASMM9PARTA048619        | AK043286         | 0.000325    | 2.0171144 | up |
| ASMM9PARTA018883        | Gm9946           | 0.0000694   | 2.842234  | up |
| ASMM9PARTA003855        |                  | 0.000229    | 3.9180405 | up |
| ASMM9PARTA001731        |                  | 0.002414143 | 2.0229678 | up |
| ASMM9PARTA011472        | Gm12988          | 0.000000334 | 2.010097  | up |
| ASMM9PARTA009795        | Gm13775          | 0.0000268   | 5.2353888 | up |
| ASMM9PARTA011317        | Hmgb1-ps3        | 0.00000706  | 2.9804971 | up |
| ASMM9PARTA047057        | AK015004         | 0.016565895 | 2.1351128 | up |
| ASMM9PARTA047057        | AK015004         | 0.016565895 | 2.1351128 | up |
| ASMM9PARTA051121        | Lrrc49           | 0.00000176  | 56.598614 | up |

|                      |                  |             |           |    |
|----------------------|------------------|-------------|-----------|----|
| ASMM9PARTA051121     | Lrrc49           | 0.00000176  | 56.598614 | up |
| ASMM9PARTA051121     | Lrrc49           | 0.00000176  | 56.598614 | up |
| ASMM9PARTA051405     | BC048761         | 0.003030621 | 5.1933436 | up |
| ASMM9PARTA051372     | BC048584         | 0.000533    | 14.077623 | up |
| ASMM9PARTA049809     | AK030206         | 0.0000469   | 3.4416368 | up |
| ASMM9PARTA049809     | AK030206         | 0.0000469   | 3.4416368 | up |
| ASMM9PARTA013829     | Gm16881          | 0.0000861   | 2.7217197 | up |
| ASMM9PARTA013829     | Gm16881          | 0.0000861   | 2.7217197 | up |
| ASMM9PARTA013829     | Gm16881          | 0.0000861   | 2.7217197 | up |
| ASMM9PARTA000678     |                  | 0.00000402  | 2.0657392 | up |
| ASMM9PARTA002375     |                  | 0.00000033  | 29.815798 | up |
| ASMM9PARTA015917     | A930028C08Rik    | 0.006757761 | 2.8449636 | up |
| ASMM9PARTA003040     |                  | 0.002429769 | 4.1964455 | up |
| ASMM9PARTA015540     | Gm14271          | 0.000123    | 4.1221213 | up |
| ASMM9PARTA018971     | AC165246.1       | 0.000443    | 4.2349753 | up |
| ASMM9PARTA047410     | AK036683         | 0.005072215 | 2.8604343 | up |
| ASMM9PARTA008364     |                  | 0.000999    | 2.244141  | up |
| ASMM9PARTA008364     |                  | 0.000999    | 2.244141  | up |
| ASMM9PARTA050412     | AK006664         | 0.016164016 | 2.0065231 | up |
| ASMM9PARTA013178     | Gm13300          | 0.000000132 | 4.1533117 | up |
| ASMM9PARTA013763     | Gm4772           | 0.011266023 | 2.366016  | up |
| ASMM9PARTA019456     | AC154013.1       | 0.003402773 | 6.8527093 | up |
| ASMM9PARTA002539     |                  | 0.0000821   | 2.2914972 | up |
| ASMM9PARTA017529     | 6720416L17Rik    | 0.00310736  | 3.1422844 | up |
| ASMM9PARTA013339     | Gm15388          | 0.004796248 | 2.186649  | up |
| ASMM9PARTA004233     |                  | 0.000597    | 4.042444  | up |
| ASMM9PARTA007792     |                  | 0.001280179 | 2.9346867 | up |
| ASMM9PARTA012546     | Gm12482          | 0.000147    | 2.6187327 | up |
| ASMM9PARTA049860     | Orai1            | 0.002793875 | 2.4832017 | up |
| ASMM9PARTA017284     | Gm16762          | 0.000257    | 4.5537424 | up |
| humanlincRNA0194+_P1 | humanlincRNA0194 | 0.030545868 | 2.594462  | up |
| ASMM9PARTA019183     | AC102815.2       | 0.002170969 | 2.1039898 | up |
| ASMM9PARTA014232     | Gm15169          | 0.01783746  | 2.7520053 | up |
| ASMM9PARTA004055     |                  | 2.72E-09    | 176.79759 | up |
| ASMM9PARTA006158     |                  | 0.0000859   | 2.583311  | up |
| ASMM9PARTA015093     | A530058N18Rik    | 0.00000423  | 2.821805  | up |
| ASMM9PARTA051011     | Pgls             | 0.001753105 | 2.686602  | up |
| ASMM9PARTA051011     | Pgls             | 0.001753105 | 2.686602  | up |
| ASMM9PARTA007558     |                  | 0.000000772 | 4.0662074 | up |
| ASMM9PARTA003147     |                  | 0.000771    | 2.931653  | up |
| CUST_375_PI426073487 | uc.377           | 0.009904888 | 5.316401  | up |
| ASMM9PARTA047189     | AK019332         | 0.0000202   | 2.5726964 | up |
| ASMM9PARTA050230     | AK131834         | 0.000197    | 31.991306 | up |
| ASMM9PARTA015208     | Gm12326          | 0.000504    | 2.3253443 | up |
| ASMM9PARTA004661     |                  | 0.000755    | 2.3564363 | up |
| CUST_428_PI426073487 | uc.430           | 0.000000364 | 9.030763  | up |
| CUST_428_PI426073487 | uc.430           | 0.000000364 | 9.030763  | up |
| CUST_428_PI426073487 | uc.430           | 0.000000364 | 9.030763  | up |
| CUST_428_PI426073487 | uc.430           | 0.000000364 | 9.030763  | up |

|                      |                  |             |           |    |
|----------------------|------------------|-------------|-----------|----|
| CUST_428_PI426073487 | uc.430           | 0.000000364 | 9.030763  | up |
| ASMM9PARTA050850     | Mcl              | 0.011990267 | 3.4236717 | up |
| ASMM9PARTA050850     | Mcl              | 0.011990267 | 3.4236717 | up |
| ASMM9PARTA051221     | Phkb             | 0.0000718   | 2.0668428 | up |
| ASMM9PARTA051221     | Phkb             | 0.0000718   | 2.0668428 | up |
| ASMM9PARTA004516     |                  | 0.000144    | 2.6064804 | up |
| ASMM9PARTA003133     |                  | 0.01317557  | 2.1849236 | up |
| ASMM9PARTA006828     |                  | 0.000000413 | 2.5142744 | up |
| ASMM9PARTA048587     | AK076984         | 0.0000156   | 5.2759423 | up |
| ASMM9PARTA014306     | 3110053B16Rik    | 0.0000153   | 2.1579196 | up |
| ASMM9PARTA013266     | Gm13214          | 0.002649052 | 2.434913  | up |
| ASMM9PARTA010400     | 9330158H04Rik    | 0.0000385   | 5.3170137 | up |
| ASMM9PARTA011807     | Gm15403          | 0.0000573   | 2.3673801 | up |
| ASMM9PARTA007283     |                  | 0.001576614 | 3.1284359 | up |
| ASMM9PARTA003077     |                  | 0.000142    | 2.3230376 | up |
| ASMM9PARTA010302     | Mup-ps7          | 0.015276058 | 3.9666667 | up |
| CUST_954_PI426073487 | uc.475           | 0.000406    | 2.6264794 | up |
| ASMM9PARTA019550     | RP23-78F6.7      | 0.0000421   | 2.9541492 | up |
| humanlincRNA1152+_P1 | humanlincRNA1152 | 0.00397527  | 2.7070966 | up |
| ASMM9PARTA047836     | 4833420G17Rik    | 0.000000226 | 3.4735205 | up |
| ASMM9PARTA047836     | 4833420G17Rik    | 0.000000226 | 3.4735205 | up |
| ASMM9PARTA044959     | E230029C05Rik    | 0.0000424   | 3.0127733 | up |
| ASMM9PARTA005240     |                  | 0.000433    | 3.6069376 | up |
| ASMM9PARTA046418     | BC018310         | 0.0000113   | 2.1052809 | up |
| ASMM9PARTA051161     | AK169831         | 0.00000542  | 2.4244323 | up |
| CUST_100_PI426409190 | AC087559.13      | 3.26E-08    | 2.1758285 | up |
| ASMM9PARTA001853     |                  | 0.0000135   | 3.704979  | up |
| ASMM9PARTA047453     | AK039140         | 0.0000558   | 2.8066964 | up |
| ASMM9PARTA047453     | AK039140         | 0.0000558   | 2.8066964 | up |
| ASMM9PARTA010001     | Gm5792           | 0.00000517  | 2.0754125 | up |
| ASMM9PARTA047221     | AK040557         | 0.0000025   | 7.556741  | up |
| ASMM9PARTA047221     | AK040557         | 0.0000025   | 7.556741  | up |
| ASMM9PARTA047221     | AK040557         | 0.0000025   | 7.556741  | up |
| ASMM9PARTA019295     | RP23-133I8.1     | 0.00000159  | 2.4911675 | up |
| ASMM9PARTA047783     | Ugcgl2           | 0.0000136   | 5.172222  | up |
| ASMM9PARTA003032     |                  | 0.014006707 | 2.4242249 | up |
| ASMM9PARTA003032     |                  | 0.014006707 | 2.4242249 | up |
| ASMM9PARTA003032     |                  | 0.014006707 | 2.4242249 | up |
| ASMM9PARTA019216     | 5830444B04Rik    | 0.012012539 | 2.1467376 | up |
| ASMM9PARTA019216     | 5830444B04Rik    | 0.012012539 | 2.1467376 | up |
| ASMM9PARTA010393     | Gm16221          | 0.0000371   | 2.2648113 | up |
| ASMM9PARTA018255     | Gm8837           | 0.000374    | 3.0742378 | up |
| ASMM9PARTA002372     |                  | 0.000325    | 3.9762456 | up |
| ASMM9PARTA019677     | RP23-82A21.1     | 0.022848116 | 2.836978  | up |
| ASMM9PARTA012510     | Gm13121          | 0.00000484  | 2.3607845 | up |
| ASMM9PARTA016207     | 4930458D05Rik    | 0.010438909 | 6.2100377 | up |
| ASMM9PARTA044960     | BC006965         | 0.0000162   | 67.15441  | up |
| ASMM9PARTA016551     | Gm16259          | 0.000094    | 2.6952586 | up |
| ASMM9PARTA016551     | Gm16259          | 0.000094    | 2.6952586 | up |



|                         |                  |             |           |    |
|-------------------------|------------------|-------------|-----------|----|
| ASMM9PARTA011946        | Mup-ps10         | 0.000041    | 4.4082055 | up |
| ASMM9PARTA012055        | Gm12118          | 0.000036    | 2.516198  | up |
| ASMM9PARTA016684        | Gm14261          | 0.000844    | 2.701113  | up |
| ASMM9PARTA016684        | Gm14261          | 0.000844    | 2.701113  | up |
| ASMM9PARTA016684        | Gm14261          | 0.000844    | 2.701113  | up |
| AA915284_P1             | mouselincRNA0740 | 0.000203    | 2.3214035 | up |
| ASMM9PARTA011936        | Gm13320          | 0.00000614  | 2.537862  | up |
| ASMM9PARTA013691        | Gm14162          | 0.0000901   | 2.7502673 | up |
| ASMM9PARTA018548        | Airn             | 0.0000222   | 2.430412  | up |
| ASMM9PARTA018548        | Airn             | 0.0000222   | 2.430412  | up |
| ASMM9PARTA016258        | 2410004N09Rik    | 0.0000808   | 3.2196906 | up |
| ASMM9PARTA044844        | Rps4y2           | 0.000079    | 2.1135077 | up |
| ASMM9PARTA007420        |                  | 0.000004    | 2.7572374 | up |
| ASMM9PARTA007420        |                  | 0.000004    | 2.7572374 | up |
| ASMM9PARTA004325        |                  | 0.000442    | 2.0255837 | up |
| ASMM9PARTA013969        | Gm11681          | 0.00137149  | 2.2397988 | up |
| ASMM9PARTA014091        | 4930419G24Rik    | 0.026020661 | 3.9461677 | up |
| ASMM9PARTA014091        | 4930419G24Rik    | 0.026020661 | 3.9461677 | up |
| ASMM9PARTA012968        | Gm15566          | 0.0000464   | 2.8185575 | up |
| ASMM9PARTA010789        | Gm12449          | 0.000062    | 2.546853  | up |
| ASMM9PARTA046840        | AK179786         | 0.0000688   | 2.6710253 | up |
| ASMM9PARTA047612        | AK039634         | 0.00000587  | 3.522073  | up |
| ASMM9PARTA010447        | Gm6088           | 0.002052184 | 2.4699576 | up |
| ASMM9PARTA010097        | Gm10361          | 0.00000536  | 2.9667628 | up |
| ASMM9PARTA000537        |                  | 0.00000273  | 5.9810114 | up |
| ASMM9PARTA045288        | 2610204G22Rik    | 0.000000141 | 2.1404438 | up |
| ASMM9PARTA001715        |                  | 0.000000918 | 2.5126276 | up |
| ASMM9PARTA003926        |                  | 0.000024    | 2.889864  | up |
| ASMM9PARTA012662        | Olfr334-ps1      | 0.003399612 | 2.0054133 | up |
| ASMM9PARTA050454        | AK076606         | 9.56E-09    | 445.75082 | up |
| ASMM9PARTA014139        | Gm3160           | 0.000000231 | 2.1778157 | up |
| ASMM9PARTA014139        | Gm3160           | 0.000000231 | 2.1778157 | up |
| ASMM9PARTA005558        |                  | 0.00000673  | 2.755438  | up |
| ASMM9PARTA018516        | Gm16290          | 0.000409    | 2.134348  | up |
| MM9LINCRNAEXON11314+_P1 | mouselincRNA0661 | 0.000611    | 2.0327842 | up |
| ASMM9PARTA015674        | Gm13112          | 0.0000193   | 5.197551  | up |
| ASMM9PARTA015674        | Gm13112          | 0.0000193   | 5.197551  | up |
| ASMM9PARTA015409        | Gm10565          | 0.004117666 | 2.9403174 | up |
| ASMM9PARTA013565        | Gm14473          | 0.0000259   | 2.5847037 | up |
| ASMM9PARTA003940        |                  | 0.03034472  | 2.2634487 | up |
| ASMM9PARTA011002        | Gm15310          | 0.001346174 | 2.4780962 | up |
| ASMM9PARTA050623        | Kox-1            | 0.004144472 | 2.7868278 | up |
| ASMM9PARTA007842        |                  | 0.000208    | 2.2019105 | up |
| ASMM9PARTA049446        | AK031919         | 0.000234    | 2.8039787 | up |
| ASMM9PARTA000684        |                  | 4.03E-08    | 6.1553197 | up |
| ASMM9PARTA018531        | RP23-274C16.2    | 0.002185957 | 2.0214283 | up |
| ASMM9PARTA011785        | Gm15575          | 0.003231675 | 2.075073  | up |
| ASMM9PARTA007743        |                  | 0.005448009 | 2.0896385 | up |
| AU018725_P1             | humanlincRNA2076 | 0.033706043 | 2.0233583 | up |

|                         |                  |             |           |    |
|-------------------------|------------------|-------------|-----------|----|
| ASMM9PARTA018872        | RP23-340E10.2    | 0.000059    | 2.3255289 | up |
| ASMM9PARTA005051        |                  | 0.016797869 | 2.3561113 | up |
| ASMM9PARTA046430        | AK153590         | 0.042234577 | 2.5575266 | up |
| ASMM9PARTA019300        | RP24-246L19.3    | 0.000135    | 2.1255887 | up |
| ASMM9PARTA013453        | Gm16471          | 0.000025    | 3.5457897 | up |
| ASMM9PARTA012045        | Gm14788          | 0.00003     | 2.640837  | up |
| ASMM9PARTA003533        |                  | 0.000504    | 2.0738938 | up |
| ASMM9PARTA012531        | Gm13385          | 0.001866921 | 2.0577526 | up |
| ASMM9PARTA012955        | Gm13932          | 0.00000918  | 2.5971808 | up |
| ASMM9PARTA010463        | Rpl13-ps5        | 0.0003      | 2.5084457 | up |
| ASMM9PARTA045371        | 5033406O09Rik    | 0.000151    | 19.874756 | up |
| ASMM9PARTA002899        |                  | 0.0000198   | 3.3824632 | up |
| ASMM9PARTA002899        |                  | 0.0000198   | 3.3824632 | up |
| ASMM9PARTA002899        |                  | 0.0000198   | 3.3824632 | up |
| ASMM9PARTA011250        | Gm11920          | 0.000406    | 2.3924294 | up |
| ASMM9PARTA001846        |                  | 0.000206    | 2.582115  | up |
| ASMM9PARTA010260        | Mup-ps2          | 0.0000222   | 5.4068246 | up |
| ASMM9PARTA002438        |                  | 0.001891725 | 3.4894876 | up |
| ASMM9PARTA049624        | BC048720         | 0.000154    | 2.3107316 | up |
| ASMM9PARTA047625        | AK153491         | 0.00000561  | 2.0996218 | up |
| CUST_846_PI426073487    | uc.367           | 0.016572911 | 2.6700237 | up |
| ASMM9PARTA046971        | AK138212         | 0.00166566  | 12.716476 | up |
| ASMM9PARTA014153        | Gm12221          | 0.018201962 | 2.487967  | up |
| AK138796_P1             | humanlincRNA0850 | 0.000000858 | 6.973278  | up |
| AK138796_P1             | humanlincRNA0850 | 0.000000858 | 6.973278  | up |
| AK138796_P1             | humanlincRNA0850 | 0.000000858 | 6.973278  | up |
| ASMM9PARTA001331        |                  | 0.008813274 | 3.2148635 | up |
| ASMM9PARTA002208        |                  | 0.00017     | 2.1622796 | up |
| ASMM9PARTA004305        |                  | 0.00000519  | 2.4267251 | up |
| ASMM9PARTA013646        | D230017M19Rik    | 0.000366    | 10.863149 | up |
| ASMM9PARTA048585        | C230097I24Rik    | 0.000121    | 2.4461868 | up |
| ASMM9PARTA004186        |                  | 0.031331185 | 2.460959  | up |
| ASMM9PARTA018972        | Gm5859           | 0.000000223 | 12.615074 | up |
| ASMM9PARTA018089        | RP23-11E12.5     | 0.00243224  | 2.2377012 | up |
| ASMM9PARTA011394        | Gm11869          | 0.002306182 | 2.0773122 | up |
| ASMM9PARTA050419        | AK158055         | 2.53E-09    | 52.151836 | up |
| MM9LINCRNAEXON11899+_P1 | mouselincRNA0173 | 0.032026485 | 2.2022645 | up |
| ASMM9PARTA047828        | AK035211         | 0.030093784 | 3.412731  | up |
| ASMM9PARTA046663        | AK053193         | 0.007637039 | 2.9658413 | up |
| MM9LINCRNAEXON12113-_P1 |                  | 0.00000972  | 2.0957308 | up |
| ASMM9PARTA011830        | Mup-ps3          | 0.0000276   | 6.961308  | up |
| ASMM9PARTA003927        |                  | 0.000162    | 132.02542 | up |
| humanlincRNA0635+_P1    | humanlincRNA0635 | 0.02540335  | 2.9597874 | up |
| ASMM9PARTA049445        | AK080657         | 0.000114    | 2.5796616 | up |
| ASMM9PARTA002402        |                  | 0.000638    | 2.1015816 | up |
| ASMM9PARTA019681        | RP23-273L20.6    | 0.000205    | 2.0095043 | up |
| ASMM9PARTA046705        | AK083030         | 0.000000741 | 3.9425938 | up |
| ASMM9PARTA017565        | Gm15545          | 0.009264852 | 2.21652   | up |
| ASMM9PARTA017565        | Gm15545          | 0.009264852 | 2.21652   | up |

|                         |                  |             |           |    |
|-------------------------|------------------|-------------|-----------|----|
| ASMM9PARTA004963        |                  | 0.0000727   | 3.7298281 | up |
| ASMM9PARTA050624        | BC048663         | 0.018868716 | 2.6872802 | up |
| ASMM9PARTA007871        |                  | 0.0000106   | 2.9992294 | up |
| ASMM9PARTA002181        |                  | 0.000000879 | 4.8205237 | up |
| ASMM9PARTA010492        | Gm13378          | 0.0000721   | 2.2401564 | up |
| EL605756_P1             | humanlincRNA0451 | 0.000506    | 3.2630463 | up |
| ASMM9PARTA003760        |                  | 0.0000485   | 2.9186254 | up |
| ASMM9PARTA016760        | Gm2694           | 0.004579674 | 2.3607674 | up |
| ASMM9PARTA019401        | 9430021M05Rik    | 0.000000957 | 5.3567877 | up |
| ASMM9PARTA019105        | RP24-84D8.2      | 0.022724025 | 2.753335  | up |
| ASMM9PARTA008261        |                  | 0.011984917 | 2.3411644 | up |
| ASMM9PARTA045550        | A230073K19Rik    | 0.00000821  | 2.0862916 | up |
| ASMM9PARTA045550        | A230073K19Rik    | 0.00000821  | 2.0862916 | up |
| ASMM9PARTA045550        | A230073K19Rik    | 0.00000821  | 2.0862916 | up |
| ASMM9PARTA013742        | Gm11506          | 0.00053     | 2.2343495 | up |
| ASMM9PARTA004719        |                  | 0.006178631 | 2.0931888 | up |
| BC040767_P1             | humanlincRNA1200 | 1.49E-08    | 76.40738  | up |
| ASMM9PARTA013516        | Gm6044           | 0.0000643   | 2.0916908 | up |
| MM9LINCRNAEXON10767+_P1 | mouselincRNA1138 | 0.002600128 | 2.709299  | up |
| ASMM9PARTA004878        |                  | 0.0465896   | 2.0205524 | up |
| ASMM9PARTA003919        |                  | 0.000000574 | 2.638879  | up |
| ASMM9PARTA018895        | RP23-388P16.10   | 0.0000918   | 2.4401617 | up |
| ASMM9PARTA001789        |                  | 0.0000895   | 2.039609  | up |
| ASMM9PARTA001789        |                  | 0.0000895   | 2.039609  | up |
| ASMM9PARTA048266        | AK143195         | 0.008352266 | 2.0969896 | up |
| ASMM9PARTA016687        | 4930430E12Rik    | 0.000128    | 2.210298  | up |
| ASMM9PARTA010790        | Gm12795          | 0.000448    | 2.068478  | up |
| ASMM9PARTA006908        |                  | 0.022319157 | 2.7486594 | up |
| ASMM9PARTA048898        | BC062254         | 0.002160315 | 2.089609  | up |
| MM9LINCRNAEXON10776+_P1 | mouselincRNA1143 | 0.006271291 | 2.0736318 | up |
| ASMM9PARTA018543        | AC160929.1       | 0.00000864  | 2.8037739 | up |
| ASMM9PARTA011748        | Gm12806          | 0.002210625 | 2.262587  | up |
| ASMM9PARTA011748        | Gm12806          | 0.002210625 | 2.262587  | up |
| ASMM9PARTA013281        | Gm12745          | 0.0000951   | 2.6216104 | up |
| ASMM9PARTA002778        |                  | 0.000121    | 2.8734906 | up |
| ASMM9PARTA051343        | Perq1            | 0.00112595  | 2.0589914 | up |
| ASMM9PARTA051343        | Perq1            | 0.00112595  | 2.0589914 | up |
| ASMM9PARTA051343        | Perq1            | 0.00112595  | 2.0589914 | up |
| ASMM9PARTA051343        | Perq1            | 0.00112595  | 2.0589914 | up |
| ASMM9PARTA051343        | Perq1            | 0.00112595  | 2.0589914 | up |
| ASMM9PARTA051343        | Perq1            | 0.00112595  | 2.0589914 | up |
| ASMM9PARTA051343        | Perq1            | 0.00112595  | 2.0589914 | up |
| ASMM9PARTA051343        | Perq1            | 0.00112595  | 2.0589914 | up |
| ASMM9PARTA051343        | Perq1            | 0.00112595  | 2.0589914 | up |
| ASMM9PARTA051343        | Perq1            | 0.00112595  | 2.0589914 | up |
| ASMM9PARTA051343        | Perq1            | 0.00112595  | 2.0589914 | up |
| ASMM9PARTA011486        | Cbx3-ps3         | 0.001600628 | 3.499587  | up |
| ASMM9PARTA046796        | BC030470         | 0.001346888 | 2.1043758 | up |
| ASMM9PARTA000041        |                  | 0.005214016 | 3.1388874 | up |
| MM9LINCRNAEXON11795+_P1 | mouselincRNA0252 | 0.0000133   | 52.483807 | up |

|                         |                  |             |           |    |
|-------------------------|------------------|-------------|-----------|----|
| MM9LINCRNAEXON10103+_P1 | mouselincRNA1524 | 0.0000585   | 5.55137   | up |
| ASMM9PARTA015949        | 5330413P13Rik    | 0.004337896 | 2.9964545 | up |
| ASMM9PARTA010261        | Gm10601          | 0.000000999 | 6.9348526 | up |
| ASMM9PARTA050367        | Mcl              | 0.00077     | 4.3386984 | up |
| ASMM9PARTA050367        | Mcl              | 0.00077     | 4.3386984 | up |
| ASMM9PARTA009606        | Gm9791           | 0.000787    | 2.7296593 | up |
| MM9LINCRNAEXON11138-_P1 |                  | 0.000105    | 2.2227647 | up |
| ASMM9PARTA004712        |                  | 0.000755    | 3.633781  | up |
| ASMM9PARTA046229        | 4933407L21Rik    | 0.0000222   | 2.043116  | up |
| ASMM9PARTA000415        |                  | 0.011903576 | 2.359702  | up |
| ASMM9PARTA046758        | Fbxo39           | 0.001037672 | 2.0745504 | up |
| ASMM9PARTA006182        |                  | 0.000485    | 2.1920044 | up |
| ASMM9PARTA005256        |                  | 0.000408    | 2.2233198 | up |
| ASMM9PARTA016109        | Gm16682          | 0.006650837 | 2.0518725 | up |
| ASMM9PARTA016109        | Gm16682          | 0.006650837 | 2.0518725 | up |
| ASMM9PARTA005775        |                  | 0.000362    | 2.6580997 | up |
| mouselincRNA1564-_P1    | mouselincRNA1564 | 0.00399927  | 2.8611562 | up |
| ASMM9PARTA012547        | Gm12308          | 0.000138    | 2.4590018 | up |
| ASMM9PARTA011271        | Gm13228          | 0.000205    | 2.2385955 | up |
| BU563586_P1             | mouselincRNA1020 | 0.0000177   | 2.8214636 | up |
| BU563586_P1             | mouselincRNA1020 | 0.0000177   | 2.8214636 | up |
| BU563586_P1             | mouselincRNA1020 | 0.0000177   | 2.8214636 | up |
| BU563586_P1             | mouselincRNA1020 | 0.0000177   | 2.8214636 | up |
| BU563586_P1             | mouselincRNA1020 | 0.0000177   | 2.8214636 | up |
| BU563586_P1             | mouselincRNA1020 | 0.0000177   | 2.8214636 | up |
| BU563586_P1             | mouselincRNA1020 | 0.0000177   | 2.8214636 | up |
| BU563586_P1             | mouselincRNA1020 | 0.0000177   | 2.8214636 | up |
| BU563586_P1             | mouselincRNA1020 | 0.0000177   | 2.8214636 | up |
| BU563586_P1             | mouselincRNA1020 | 0.0000177   | 2.8214636 | up |
| BU563586_P1             | mouselincRNA1020 | 0.0000177   | 2.8214636 | up |
| ASMM9PARTA011414        | Gm15778          | 0.0000358   | 2.7669818 | up |
| ASMM9PARTA050140        | AK050091         | 0.0447964   | 2.1253493 | up |
| ASMM9PARTA019398        | RP24-376M8.4     | 0.016682565 | 2.4897163 | up |
| ASMM9PARTA002398        |                  | 0.018772587 | 2.245651  | up |
| ASMM9PARTA050618        | AK007376         | 0.002513846 | 5.951765  | up |
| ASMM9PARTA003826        |                  | 0.0000512   | 2.6118374 | up |
| ASMM9PARTA045625        | Hmgb1-rs17       | 0.0000351   | 2.2052023 | up |
| ASMM9PARTA009936        | Mup-ps7          | 0.000412    | 5.7239637 | up |
| MM9LINCRNAEXON11341-_P1 |                  | 0.001316639 | 2.0538328 | up |
| ASMM9PARTA001043        |                  | 0.0000404   | 2.2346153 | up |
| ASMM9PARTA006890        |                  | 0.01447322  | 3.7633927 | up |
| ASMM9PARTA001365        |                  | 0.0000293   | 2.2528622 | up |
| ASMM9PARTA002329        |                  | 0.00000686  | 8.89867   | up |
| ASMM9PARTA010004        | Gm8332           | 0.000635    | 2.1689298 | up |
| ASMM9PARTA012094        | Gm6461           | 0.00000557  | 2.7464592 | up |
| ASMM9PARTA012215        | Mup-ps19         | 0.0000575   | 10.208999 | up |
| ASMM9PARTA007042        |                  | 0.00524065  | 4.28312   | up |
| ASMM9PARTA009756        | Usp35            | 0.003795602 | 3.0378175 | up |

|                         |                  |             |           |    |
|-------------------------|------------------|-------------|-----------|----|
| ASMM9PARTA012898        | Gm5396           | 0.00000307  | 2.2883086 | up |
| ASMM9PARTA001969        |                  | 0.000000517 | 6.210554  | up |
| CUST_174_PI426073487    | uc.176           | 0.00296069  | 5.368654  | up |
| ASMM9PARTA018095        | Gm16990          | 0.0000511   | 7.036365  | up |
| ASMM9PARTA010235        | Gm13300          | 0.0000434   | 2.9077394 | up |
| MM9LINCRNAEXON11850-_P1 | mouselincRNA0276 | 0.0000261   | 2.2649379 | up |
| CUST_103_PI426409190    | AC087559.5       | 0.00000257  | 4.0644464 | up |
| ASMM9PARTA007872        |                  | 0.013928003 | 3.1891036 | up |
| MM9LINCRNAEXON10492+_P1 | mouselincRNA1320 | 0.011921521 | 2.6611245 | up |
| ASMM9PARTA017214        | Gm15135          | 0.029552817 | 2.2397726 | up |
| MM9LINCRNAEXON10352+_P1 |                  | 0.000248    | 2.9232256 | up |
| ASMM9PARTA045124        | 2610203C22Rik    | 0.0000389   | 9.556516  | up |
| ASMM9PARTA045124        | 2610203C22Rik    | 0.0000389   | 9.556516  | up |
| ASMM9PARTA002204        |                  | 0.0000175   | 2.1102927 | up |
| ASMM9PARTA013698        | Gm13366          | 0.03154388  | 2.083002  | up |
| ASMM9PARTA007430        |                  | 0.004021823 | 2.304885  | up |
| ASMM9PARTA000642        |                  | 0.044364646 | 2.075406  | up |
| ASMM9PARTA012120        | Gm5937           | 0.0000278   | 2.4145372 | up |
| MM9LINCRNAEXON10420+_P1 | mouselincRNA1264 | 1.18E-08    | 57.515907 | up |
| ASMM9PARTA014788        | B930095G15Rik    | 0.00000174  | 5.062689  | up |
| ASMM9PARTA002762        |                  | 0.039199233 | 2.2099137 | up |
| ASMM9PARTA009923        | Gm12222          | 0.000288    | 2.4782395 | up |
| ASMM9PARTA002260        |                  | 0.0000932   | 4.927838  | up |
| ASMM9PARTA002260        |                  | 0.0000932   | 4.927838  | up |
| ASMM9PARTA048313        | AK153988         | 0.0000588   | 2.1362422 | up |
| MM9LINCRNAEXON10135+_P1 | mouselincRNA1563 | 0.000368    | 2.2607794 | up |
| ASMM9PARTA005006        |                  | 0.04997351  | 2.363824  | up |
| ASMM9PARTA010427        | Gm13714          | 0.0000576   | 2.2930443 | up |
| ASMM9PARTA004889        |                  | 0.015661104 | 2.5439157 | up |
| ASMM9PARTA045192        | Ipw              | 0.00000968  | 6.6196465 | up |
| ASMM9PARTA008991        |                  | 0.004460741 | 3.7944827 | up |
| ASMM9PARTA017528        | Gm13643          | 0.000000823 | 12.318098 | up |
| ASMM9PARTA010788        | Gm12261          | 0.00000954  | 2.4132397 | up |
| ASMM9PARTA002426        |                  | 0.0000278   | 2.6535096 | up |
| ASMM9PARTA011432        | Gm15036          | 0.014262523 | 2.2848454 | up |
| ASMM9PARTA045874        | Gm10125          | 0.00000618  | 3.9956224 | up |
| ASMM9PARTA014333        | 1500016L03Rik    | 0.003832524 | 3.660633  | up |
| CUST_478_PI426073487    | uc.480           | 0.001674797 | 2.727503  | up |
| CUST_478_PI426073487    | uc.480           | 0.001674797 | 2.727503  | up |
| ASMM9PARTA050514        | AK039340         | 0.000267    | 2.5338933 | up |
| ASMM9PARTA011755        | Hmgb1-ps6        | 0.000044    | 2.452737  | up |
| ASMM9PARTA003346        |                  | 0.000652    | 4.2312984 | up |
| ASMM9PARTA003346        |                  | 0.000652    | 4.2312984 | up |
| ASMM9PARTA003370        |                  | 0.018529471 | 2.1665783 | up |
| ASMM9PARTA001844        |                  | 0.000000869 | 8.687704  | up |
| ASMM9PARTA019220        | AC109232.1       | 0.00000138  | 6.507343  | up |
| ASMM9PARTA008820        |                  | 0.0000107   | 7.4877944 | up |
| ASMM9PARTA015931        | Mup-ps2          | 0.00105642  | 3.0925615 | up |
| ASMM9PARTA009267        | Hspe1-rs1        | 0.002262701 | 2.404381  | up |

|                         |                  |             |             |      |
|-------------------------|------------------|-------------|-------------|------|
| ASMM9PARTA013762        | Gm12956          | 0.001371216 | 2.5402799   | up   |
| ASMM9PARTA050763        | NR_002895        | 0.0000468   | 2.680639    | up   |
| ASMM9PARTA018665        | Rpsa-ps4         | 0.0000547   | 2.817196    | up   |
| humanlincRNA1563+_P1    | humanlincRNA1563 | 0.025340265 | 2.0704727   | up   |
| ASMM9PARTA014299        | Gm13375          | 0.000103    | 2.2424648   | up   |
| ASMM9PARTA047295        | AK014224         | 0.001279673 | 3.3696115   | up   |
| ASMM9PARTA008253        |                  | 0.000447    | 2.541515    | up   |
| ASMM9PARTA008253        |                  | 0.000447    | 2.541515    | up   |
| CUST_327_PI426073487    | uc.329           | 0.03800932  | 2.0488782   | up   |
| CUST_327_PI426073487    | uc.329           | 0.03800932  | 2.0488782   | up   |
| ASMM9PARTA012250        | Gm15387          | 0.0000136   | 2.4925725   | up   |
| ASMM9PARTA010666        | Gm13890          | 0.000918    | 4.147316    | up   |
| ASMM9PARTA045335        | H2-K2            | 0.000081    | 2.0002196   | up   |
| ASMM9PARTA046244        | AK171408         | 0.000374    | 4.584018    | up   |
| ASMM9PARTA007018        |                  | 0.015436559 | 2.6748734   | up   |
| ASMM9PARTA019679        | Gm3892           | 0.0000114   | 2.7301052   | up   |
| ASMM9PARTA050456        | A530053G22Rik    | 0.000297    | 4.455251    | up   |
| ASMM9PARTA006915        |                  | 0.0272825   | 2.5301056   | up   |
| ASMM9PARTA011740        | Gm14688          | 0.0000194   | 2.489045    | up   |
| ASMM9PARTA004567        |                  | 0.0000241   | 5.1733522   | up   |
| ASMM9PARTA011990        | Lamr1-ps1        | 0.0000345   | 7.180089    | up   |
| ASMM9PARTA010121        | Gm14162          | 0.000251    | 3.2333097   | up   |
| ASMM9PARTA048739        | AK039017         | 0.001882068 | 4.270442    | up   |
| ASMM9PARTA048739        | AK039017         | 0.001882068 | 4.270442    | up   |
| DV653038_P1             | mouselincRNA1246 | 0.000417    | 2.278675    | up   |
| DV653038_P1             | mouselincRNA1246 | 0.000417    | 2.278675    | up   |
| DV653038_P1             | mouselincRNA1246 | 0.000417    | 2.278675    | up   |
| DV653038_P1             | mouselincRNA1246 | 0.000417    | 2.278675    | up   |
| DV653038_P1             | mouselincRNA1246 | 0.000417    | 2.278675    | up   |
| DV653038_P1             | mouselincRNA1246 | 0.000417    | 2.278675    | up   |
| ASMM9PARTA008317        |                  | 0.00078     | 0.323063677 | down |
| ASMM9PARTA004702        |                  | 0.045818124 | 0.479904572 | down |
| ASMM9PARTA045034        | Gm4759           | 0.011067896 | 0.275980455 | down |
| ASMM9PARTA004200        |                  | 0.000538    | 0.307007483 | down |
| MM9LINCRNAEXON11995-_P1 | mouselincRNA0004 | 0.000337    | 0.449832802 | down |
| ASMM9PARTA014873        | Gm16206          | 0.017974988 | 0.383945252 | down |
| ASMM9PARTA046074        | F630042J09Rik    | 0.02230519  | 0.484179156 | down |
| CA559477_P1             | humanlincRNA2085 | 0.00000106  | 0.345139247 | down |
| MM9LINCRNAEXON10677-_P1 | mouselincRNA1108 | 0.013267624 | 0.342984529 | down |
| ASMM9PARTA014450        | Gm11508          | 0.00000196  | 0.251871925 | down |
| ASMM9PARTA014450        | Gm11508          | 0.00000196  | 0.251871925 | down |
| ASMM9PARTA049723        | AK017111         | 0.0000171   | 0.240110278 | down |
| ASMM9PARTA051617        | AK039014         | 0.017692    | 0.436916719 | down |
| ASMM9PARTA004651        |                  | 0.034654997 | 0.253662262 | down |
| MM9LINCRNAEXON10155-_P1 |                  | 0.00000171  | 0.426029372 | down |
| ASMM9PARTA000135        |                  | 0.0000154   | 0.291929029 | down |
| ASMM9PARTA047204        | D12Ertd551e      | 0.00432953  | 0.488454045 | down |
| ASMM9PARTA000932        |                  | 0.003065578 | 0.257932149 | down |
| ASMM9PARTA008248        |                  | 0.010611367 | 0.461417705 | down |

|                         |                  |             |             |      |
|-------------------------|------------------|-------------|-------------|------|
| ASMM9PARTA049912        | AK041061         | 0.0000278   | 0.497772642 | down |
| MM9LINCRNAEXON10863-_P1 | mouselincRNA1009 | 0.000486    | 0.323871545 | down |
| MM9LINCRNAEXON11127-_P1 | mouselincRNA0742 | 0.0000269   | 0.437182264 | down |
| ASMM9PARTA045333        | 3110099E03Rik    | 0.005419604 | 0.470902022 | down |
| ASMM9PARTA016600        | Gm13150          | 0.000212    | 0.497721481 | down |
| ASMM9PARTA016483        | Rgs1             | 0.012412198 | 0.476632723 | down |
| MM9LINCRNAEXON10861-_P1 | mouselincRNA1009 | 0.002390658 | 0.479455339 | down |
| ASMM9PARTA006658        |                  | 0.023637507 | 0.200424676 | down |
| ASMM9PARTA017533        | A930038B10Rik    | 0.024687821 | 0.496752875 | down |
| ASMM9PARTA047203        | AK135975         | 0.0002      | 0.270557734 | down |
| ASMM9PARTA049557        | AK036227         | 0.00000873  | 0.232341306 | down |
| ASMM9PARTA049557        | AK036227         | 0.00000873  | 0.232341306 | down |
| ASMM9PARTA004048        |                  | 0.00000203  | 0.162229882 | down |
| ASMM9PARTA048692        | AK053505         | 0.0000165   | 0.187414059 | down |
| ASMM9PARTA048692        | AK053505         | 0.0000165   | 0.187414059 | down |
| ASMM9PARTA047030        | BC079904         | 0.01487201  | 0.39166645  | down |
| ASMM9PARTA051638        | Fxy              | 0.0000206   | 0.235417255 | down |
| ASMM9PARTA051638        | Fxy              | 0.0000206   | 0.235417255 | down |
| ASMM9PARTA013130        | Gm15035          | 0.0000211   | 0.381320264 | down |
| ASMM9PARTA018906        | AC122371.1       | 0.036727384 | 0.466418781 | down |
| MM9LINCRNAEXON10461+_P1 | mouselincRNA1289 | 0.012286497 | 0.357422591 | down |
| ASMM9PARTA013774        | Gm14204          | 0.036426283 | 0.486297758 | down |
| ASMM9PARTA019893        |                  | 0.005559176 | 0.241674203 | down |
| ASMM9PARTA000020        |                  | 0.008395591 | 0.181439284 | down |
| ASMM9PARTA010105        | Ear-ps2          | 0.0000621   | 0.242448711 | down |
| ASMM9PARTA004261        |                  | 0.0000746   | 0.466873025 | down |
| ASMM9PARTA048135        | AK007154         | 0.018609809 | 0.409617206 | down |
| ASMM9PARTA048135        | AK007154         | 0.018609809 | 0.409617206 | down |
| ASMM9PARTA048135        | AK007154         | 0.018609809 | 0.409617206 | down |
| ASMM9PARTA048135        | AK007154         | 0.018609809 | 0.409617206 | down |
| ASMM9PARTA048135        | AK007154         | 0.018609809 | 0.409617206 | down |
| ASMM9PARTA048135        | AK007154         | 0.018609809 | 0.409617206 | down |
| ASMM9PARTA046300        | AK046727         | 0.00000244  | 0.489751701 | down |
| ASMM9PARTA004593        |                  | 0.000183    | 0.481923832 | down |
| CUST_6_PI426409190      | LOC665622        | 0.001406992 | 0.472467745 | down |
| CUST_6_PI426409190      | LOC665622        | 0.001406992 | 0.472467745 | down |
| CUST_6_PI426409190      | LOC665622        | 0.001406992 | 0.472467745 | down |
| CUST_6_PI426409190      | LOC665622        | 0.001406992 | 0.472467745 | down |
| MM9LINCRNAEXON11325+_P1 |                  | 0.0000351   | 0.038410349 | down |
| ASMM9PARTA007331        |                  | 0.02422406  | 0.46455937  | down |
| ASMM9PARTA008226        |                  | 0.048964903 | 0.482049327 | down |
| ASMM9PARTA005747        |                  | 0.0000366   | 0.329263396 | down |
| ASMM9PARTA010002        | Cecr6            | 0.00000127  | 0.433035236 | down |
| MM9LINCRNAEXON11848-_P1 | mouselincRNA0275 | 0.001058863 | 0.369121727 | down |
| BY346886_P1             | mouselincRNA1073 | 0.005346434 | 0.469310034 | down |
| ASMM9PARTA000308        |                  | 0.001435583 | 0.158079508 | down |
| ASMM9PARTA019551        |                  | 0.010182098 | 0.207589213 | down |
| ASMM9PARTA013679        | Gm14373          | 0.000291    | 0.478385651 | down |
| ASMM9PARTA048535        | AK122507         | 0.0000504   | 0.370215374 | down |

|                         |                  |             |             |      |
|-------------------------|------------------|-------------|-------------|------|
| ASMM9PARTA004828        |                  | 0.011135699 | 0.416525222 | down |
| CUST_492_PI426073487    | uc.12            | 0.0000407   | 0.354797745 | down |
| ASMM9PARTA004412        |                  | 0.0000825   | 0.467161512 | down |
| ASMM9PARTA014587        | 1110050K14Rik    | 0.049366653 | 0.497672064 | down |
| ASMM9PARTA005650        |                  | 0.0000091   | 0.464386005 | down |
| BG404676_P1             | mouselincRNA1540 | 0.00304584  | 0.402538731 | down |
| ASMM9PARTA000477        |                  | 0.04826826  | 0.452972036 | down |
| ASMM9PARTA001867        |                  | 0.000189    | 0.450420159 | down |
| ASMM9PARTA050182        | AB294528         | 0.0000123   | 0.345900295 | down |
| ASMM9PARTA048103        | AK043982         | 0.0000444   | 0.384019814 | down |
| ASMM9PARTA047164        | AK144886         | 0.012499584 | 0.398548185 | down |
| ASMM9PARTA007801        |                  | 0.000155    | 0.15379209  | down |
| ASMM9PARTA014733        | H19              | 0.000101    | 0.463343613 | down |
| ASMM9PARTA006749        |                  | 0.017441845 | 0.431024004 | down |
| ASMM9PARTA006749        |                  | 0.017441845 | 0.431024004 | down |
| ASMM9PARTA051651        | AK038272         | 0.0000178   | 0.409547855 | down |
| ASMM9PARTA051651        | AK038272         | 0.0000178   | 0.409547855 | down |
| ASMM9PARTA007449        |                  | 0.020689862 | 0.358001165 | down |
| ASMM9PARTA006132        |                  | 0.00105592  | 0.221923759 | down |
| ASMM9PARTA006132        |                  | 0.00105592  | 0.221923759 | down |
| ASMM9PARTA006132        |                  | 0.00105592  | 0.221923759 | down |
| ASMM9PARTA048083        | AK045744         | 0.001346885 | 0.106290687 | down |
| ASMM9PARTA008491        |                  | 0.00092     | 0.357186179 | down |
| MM9LINCRNAEXON10200+_P1 |                  | 0.0000268   | 0.146556941 | down |
| BI853964_P1             | mouselincRNA0749 | 0.0000928   | 0.143630711 | down |
| ASMM9PARTA001721        |                  | 0.00131355  | 0.466297487 | down |
| ASMM9PARTA001455        |                  | 0.003796017 | 0.42183095  | down |
| ASMM9PARTA045969        | AI507597         | 0.0000264   | 0.4715347   | down |
| ASMM9PARTA011123        | Gm13295          | 0.00000432  | 0.28997286  | down |
| ASMM9PARTA015982        | Gm13010          | 0.002972326 | 0.472327735 | down |
| ASMM9PARTA011789        | Gm12856          | 0.007483234 | 0.470690259 | down |
| ASMM9PARTA009220        |                  | 0.00000458  | 0.454223121 | down |
| ASMM9PARTA002356        |                  | 0.0000147   | 0.407654679 | down |
| ASMM9PARTA045353        | Gm4489           | 0.031756688 | 0.386736635 | down |
| CN686219_P1             | mouselincRNA0474 | 0.000863    | 0.381729699 | down |
| CN686219_P1             | mouselincRNA0474 | 0.000863    | 0.381729699 | down |
| CN686219_P1             | mouselincRNA0474 | 0.000863    | 0.381729699 | down |
| CN686219_P1             | mouselincRNA0474 | 0.000863    | 0.381729699 | down |
| CN686219_P1             | mouselincRNA0474 | 0.000863    | 0.381729699 | down |
| CN686219_P1             | mouselincRNA0474 | 0.000863    | 0.381729699 | down |
| CN686219_P1             | mouselincRNA0474 | 0.000863    | 0.381729699 | down |
| CN686219_P1             | mouselincRNA0474 | 0.000863    | 0.381729699 | down |
| CN686219_P1             | mouselincRNA0474 | 0.000863    | 0.381729699 | down |
| CN686219_P1             | mouselincRNA0474 | 0.000863    | 0.381729699 | down |
| ASMM9PARTA049367        | AK040035         | 0.008649284 | 0.408644198 | down |
| mouselincRNA1010-_P1    | mouselincRNA1010 | 0.03228873  | 0.337941675 | down |
| MM9LINCRNAEXON11962-_P1 |                  | 0.0000372   | 0.497458485 | down |
| ASMM9PARTA019104        | AC104908.1       | 0.001455817 | 0.259347776 | down |
| ASMM9PARTA046259        | Gm4814           | 0.000223    | 0.317045119 | down |



|                         |                           |             |             |      |
|-------------------------|---------------------------|-------------|-------------|------|
| ASMM9PARTA006436        |                           | 0.018438153 | 0.465320154 | down |
| ASMM9PARTA017459        | Hoxb3os                   | 0.0000851   | 0.237138104 | down |
| ASMM9PARTA017459        | Hoxb3os                   | 0.0000851   | 0.237138104 | down |
| ASMM9PARTA017459        | Hoxb3os                   | 0.0000851   | 0.237138104 | down |
| BY084980_P1             | mouselincRNA0727          | 0.0000816   | 0.478134023 | down |
| ASMM9PARTA001734        |                           | 0.028122596 | 0.452975401 | down |
| CF425770_P1             | humanlincRNA1138          | 0.000000676 | 0.399256377 | down |
| mouselincRNA0582-_P1    | mouselincRNA0582          | 0.006611501 | 0.45220247  | down |
| ASMM9PARTA003240        |                           | 0.026461126 | 0.232529046 | down |
| ASMM9PARTA008736        |                           | 0.004970821 | 0.444055787 | down |
| ASMM9PARTA008736        |                           | 0.004970821 | 0.444055787 | down |
| ASMM9PARTA008228        |                           | 0.000502    | 0.408748894 | down |
| ASMM9PARTA008228        |                           | 0.000502    | 0.408748894 | down |
| ASMM9PARTA016063        | AI854517                  | 0.0000137   | 0.484768853 | down |
| ASMM9PARTA045941        | D830015G02Rik             | 0.0000921   | 0.099167214 | down |
| ASMM9PARTA046086        |                           | 0.001464829 | 0.122741555 | down |
| ASMM9PARTA048613        | L3mbtl4                   | 0.000106    | 0.400969062 | down |
| ASMM9PARTA016656        | 1700015O11Rik             | 0.00000124  | 0.228541214 | down |
| ASMM9PARTA000311        |                           | 0.021721914 | 0.219778626 | down |
| ASMM9PARTA046121        |                           | 0.01409216  | 0.444191749 | down |
| ASMM9PARTA003440        |                           | 0.0000219   | 0.289629749 | down |
| ASMM9PARTA007489        |                           | 0.00000204  | 0.232432707 | down |
| ASMM9PARTA050521        | TCRBVbeta5.1/Jbeta<br>1.5 | 0.000332    | 0.475368202 | down |
| ASMM9PARTA008455        |                           | 0.001356535 | 0.432946351 | down |
| ASMM9PARTA006997        |                           | 0.026933365 | 0.165626134 | down |
| ASMM9PARTA017466        | Dleu2                     | 0.0000231   | 0.445850797 | down |
| ASMM9PARTA001010        |                           | 0.000000499 | 0.486175762 | down |
| ASMM9PARTA014368        | 2410018L13Rik             | 0.0000928   | 0.152342649 | down |
| ASMM9PARTA050350        | 4631427C17Rik             | 0.000133    | 0.482290765 | down |
| ASMM9PARTA050350        | 4631427C17Rik             | 0.000133    | 0.482290765 | down |
| ASMM9PARTA050350        | 4631427C17Rik             | 0.000133    | 0.482290765 | down |
| ASMM9PARTA011079        | Gm8688                    | 0.010357689 | 0.488792477 | down |
| ASMM9PARTA047495        | EG218444                  | 0.026615096 | 0.45159347  | down |
| ASMM9PARTA045493        | D6Ert474e                 | 0.00000335  | 0.486300431 | down |
| ASMM9PARTA012907        | Gm11299                   | 0.000332    | 0.428477047 | down |
| ASMM9PARTA005833        |                           | 0.000342    | 0.426909379 | down |
| ASMM9PARTA005384        |                           | 0.000324    | 0.455417185 | down |
| ASMM9PARTA007850        |                           | 0.00000185  | 0.304420156 | down |
| ASMM9PARTA019683        |                           | 0.003445593 | 0.144617807 | down |
| ASMM9PARTA049031        | AK184713                  | 0.0000212   | 0.272724273 | down |
| ASMM9PARTA005870        |                           | 0.016775636 | 0.472426452 | down |
| MM9LINCRNAEXON10601+_P1 | mouselincRNA1220          | 0.000366    | 0.480150737 | down |
| MM9LINCRNAEXON12015-_P1 | mouselincRNA0025          | 0.000015    | 0.222110279 | down |
| ASMM9PARTA047748        | AK083927                  | 0.001108011 | 0.369544575 | down |
| CJ133294_P1             | mouselincRNA0439          | 0.019555258 | 0.413231969 | down |
| ASMM9PARTA048698        | Glis3                     | 0.015152084 | 0.409813156 | down |
| MM9LINCRNAEXON10306-_P1 | mouselincRNA1357          | 0.009085594 | 0.458682984 | down |
| ASMM9PARTA000786        |                           | 0.011288716 | 0.392976041 | down |

|                         |                  |             |             |      |
|-------------------------|------------------|-------------|-------------|------|
| ASMM9PARTA046085        |                  | 0.011937083 | 0.178640588 | down |
| ASMM9PARTA003595        |                  | 0.012592565 | 0.433856213 | down |
| ASMM9PARTA003595        |                  | 0.012592565 | 0.433856213 | down |
| ASMM9PARTA050764        | U80893           | 0.000000389 | 0.161642364 | down |
| CUST_185_PI426409190    |                  | 0.000113    | 0.275998561 | down |
| ASMM9PARTA009159        |                  | 0.048507366 | 0.47605258  | down |
| ASMM9PARTA045623        | D030047H15Rik    | 0.03904449  | 0.383334399 | down |
| ASMM9PARTA045623        | D030047H15Rik    | 0.03904449  | 0.383334399 | down |
| ASMM9PARTA045623        | D030047H15Rik    | 0.03904449  | 0.383334399 | down |
| ASMM9PARTA045623        | D030047H15Rik    | 0.03904449  | 0.383334399 | down |
| ASMM9PARTA049201        | Hltf             | 0.0142338   | 0.387478208 | down |
| ASMM9PARTA049201        | Hltf             | 0.0142338   | 0.387478208 | down |
| ASMM9PARTA001382        |                  | 0.000245    | 0.492685784 | down |
| ASMM9PARTA017928        | 7SK.121          | 0.000224    | 0.479489248 | down |
| MM9LINCRNAEXON11779-_P1 | mouselincRNA0246 | 0.000892    | 0.435011557 | down |
| ASMM9PARTA050215        | AK040684         | 0.001922275 | 0.494779825 | down |
| ASMM9PARTA004517        |                  | 0.0000742   | 0.419732868 | down |
| ASMM9PARTA015110        | 1700016P03Rik    | 0.00000336  | 0.318547566 | down |
| CUST_787_PI426073487    | uc.308           | 0.000352    | 0.296559641 | down |
| CUST_787_PI426073487    | uc.308           | 0.000352    | 0.296559641 | down |
| ASMM9PARTA011864        | Gm13086          | 0.00000117  | 0.311332949 | down |
| ASMM9PARTA049722        | LOC433791        | 0.000000541 | 0.137501915 | down |
| ASMM9PARTA049722        | LOC433791        | 0.000000541 | 0.137501915 | down |
| ASMM9PARTA049722        | LOC433791        | 0.000000541 | 0.137501915 | down |
| ASMM9PARTA049722        | LOC433791        | 0.000000541 | 0.137501915 | down |
| ASMM9PARTA049722        | LOC433791        | 0.000000541 | 0.137501915 | down |
| ASMM9PARTA049722        | LOC433791        | 0.000000541 | 0.137501915 | down |
| ASMM9PARTA049722        | LOC433791        | 0.000000541 | 0.137501915 | down |
| MM9LINCRNAEXON11245+_P1 | mouselincRNA0732 | 0.0000577   | 0.483223588 | down |
| ASMM9PARTA007901        |                  | 0.00012     | 0.381145001 | down |
| MM9LINCRNAEXON10210-_P1 | mouselincRNA1477 | 0.00579754  | 0.426008501 | down |
| ASMM9PARTA015002        | 2700023E23Rik    | 0.00161172  | 0.443211725 | down |
| MM9LINCRNAEXON11847-_P1 | mouselincRNA0275 | 0.000658    | 0.470935509 | down |
| ASMM9PARTA049513        | AK080176         | 0.00000908  | 0.181798402 | down |
| ASMM9PARTA001264        |                  | 0.023612143 | 0.410594454 | down |
| ASMM9PARTA008731        |                  | 0.000272    | 0.379507794 | down |
| ASMM9PARTA006027        |                  | 0.005879375 | 0.497581901 | down |
| ASMM9PARTA000840        |                  | 0.008521841 | 0.259091307 | down |
| ASMM9PARTA001040        |                  | 0.00474639  | 0.477960204 | down |
| ASMM9PARTA051561        |                  | 0.000000825 | 0.05542597  | down |
| ASMM9PARTA050490        | H4               | 0.0000341   | 0.482699681 | down |
| ASMM9PARTA001112        |                  | 0.002098108 | 0.302450963 | down |
| ASMM9PARTA047242        | AK019801         | 0.00219174  | 0.357155    | down |
| ASMM9PARTA001387        |                  | 0.02446659  | 0.416824747 | down |
| ASMM9PARTA000104        |                  | 0.010006199 | 0.346658241 | down |
| ASMM9PARTA002587        |                  | 0.00000629  | 0.358638945 | down |
| CUST_131_PI426073487    | uc.133           | 0.013562259 | 0.463886914 | down |
| ASMM9PARTA008980        |                  | 0.000342    | 0.441418667 | down |
| ASMM9PARTA005120        |                  | 0.0000191   | 0.267256341 | down |

|                          |                  |             |             |      |
|--------------------------|------------------|-------------|-------------|------|
| ASMM9PARTA009176         |                  | 0.006131728 | 0.132038825 | down |
| ASMM9PARTA017680         | Gm6038           | 0.015924927 | 0.491778254 | down |
| ASMM9PARTA045652         | Klk1b7-ps        | 0.001129593 | 0.399895052 | down |
| AV461233_P1              | mouselincRNA1513 | 0.003009132 | 0.478287608 | down |
| CUST_718_PI426073487     | uc.239           | 0.00000594  | 0.435599225 | down |
| ASMM9PARTA019411         | AL672241.1       | 0.000159    | 0.467324441 | down |
| humanlincRNA1165-_P1     | humanlincRNA1165 | 0.001016832 | 0.35399819  | down |
| ASMM9PARTA007177         |                  | 0.03998618  | 0.386111955 | down |
| MM9LINC RNAEXON10524+_P1 |                  | 0.0000826   | 0.020699541 | down |
| MM9LINC RNAEXON11395-_P1 |                  | 0.000012    | 0.452577565 | down |
| ASMM9PARTA004207         |                  | 0.017134914 | 0.458882394 | down |
| ASMM9PARTA050789         | 1700073E17Rik    | 0.004283616 | 0.431445658 | down |
| MM9LINC RNAEXON11664-_P1 | mouselincRNA0308 | 0.003317551 | 0.271664519 | down |
| ASMM9PARTA005200         |                  | 0.00000197  | 0.420034574 | down |
| humanlincRNA2296-_P1     | humanlincRNA2296 | 0.002244888 | 0.269267612 | down |
| MM9LINC RNAEXON10678+_P1 | mouselincRNA1108 | 0.021666337 | 0.482351064 | down |
| ASMM9PARTA050513         | Ppfia3           | 0.0000849   | 0.42885435  | down |
| MM9LINC RNAEXON11536+_P1 | mouselincRNA0380 | 0.002718529 | 0.449363477 | down |
| ASMM9PARTA008371         |                  | 0.008770536 | 0.421123363 | down |
| ASMM9PARTA008614         |                  | 0.002326884 | 0.405194759 | down |
| ASMM9PARTA003080         |                  | 0.0000525   | 0.441217634 | down |
| ASMM9PARTA014713         | C030005K06Rik    | 0.015463608 | 0.305064278 | down |
| ASMM9PARTA014713         | C030005K06Rik    | 0.015463608 | 0.305064278 | down |
| ASMM9PARTA014713         | C030005K06Rik    | 0.015463608 | 0.305064278 | down |
| ASMM9PARTA002908         |                  | 0.001910946 | 0.383943041 | down |
| MM9LINC RNAEXON10967+_P1 |                  | 0.000729    | 0.216779679 | down |
| ASMM9PARTA011719         | Gm11862          | 0.006367177 | 0.420677582 | down |
| ASMM9PARTA000239         |                  | 0.000000336 | 0.03475139  | down |
| ASMM9PARTA000239         |                  | 0.000000336 | 0.03475139  | down |
| ASMM9PARTA050235         | AK138476         | 0.0031879   | 0.490365904 | down |
| ASMM9PARTA049793         | BC082597         | 0.01580295  | 0.437353678 | down |
| ASMM9PARTA044635         | Psg-ps1          | 0.032420322 | 0.484841151 | down |
| humanlincRNA2257-_P1     | humanlincRNA2257 | 0.001692752 | 0.237633527 | down |
| ASMM9PARTA001071         |                  | 0.00520089  | 0.321642818 | down |
| ASMM9PARTA050576         | AK158295         | 0.007278598 | 0.283253886 | down |
| ASMM9PARTA000019         |                  | 0.00095     | 0.082972555 | down |
| MM9LINC RNAEXON10652-_P1 | mouselincRNA1089 | 0.03774847  | 0.489068057 | down |
| MM9LINC RNAEXON10366+_P1 |                  | 0.028418727 | 0.491167    | down |
| MM9LINC RNAEXON10174-_P1 | mouselincRNA1432 | 0.000262    | 0.349179531 | down |
| MM9LINC RNAEXON10365-_P1 | mouselincRNA1405 | 0.032103196 | 0.444666382 | down |
| ASMM9PARTA047559         | AK042724         | 0.000595    | 0.491072547 | down |
| humanlincRNA0791+_P1     | humanlincRNA0791 | 0.015497944 | 0.468182943 | down |
| ASMM9PARTA013573         | Gm12929          | 0.0000251   | 0.386969289 | down |
| ASMM9PARTA002701         |                  | 0.000999    | 0.484212119 | down |
| humanlincRNA0095-_P1     | humanlincRNA0095 | 0.021872127 | 0.499637213 | down |
| ASMM9PARTA007172         |                  | 0.03535574  | 0.368568888 | down |
| CUST_40_PI426073487      | uc.42            | 0.019246697 | 0.487804212 | down |
| ASMM9PARTA008140         |                  | 0.042193063 | 0.429057674 | down |
| ASMM9PARTA008140         |                  | 0.042193063 | 0.429057674 | down |

|                         |                  |             |             |      |
|-------------------------|------------------|-------------|-------------|------|
| ASMM9PARTA047980        | TCR-V[alpha]new  | 0.039930906 | 0.357050955 | down |
| ASMM9PARTA050956        | BC021774         | 0.001269584 | 0.265815547 | down |
| ASMM9PARTA050956        | BC021774         | 0.001269584 | 0.265815547 | down |
| ASMM9PARTA050956        | BC021774         | 0.001269584 | 0.265815547 | down |
| ASMM9PARTA003098        |                  | 0.0000151   | 0.459038186 | down |
| ASMM9PARTA015793        | Gm13026          | 0.013562483 | 0.426883136 | down |
| CUST_103_PI426073487    | uc.105           | 0.04360546  | 0.300955027 | down |
| CUST_103_PI426073487    | uc.105           | 0.04360546  | 0.300955027 | down |
| ASMM9PARTA007517        |                  | 0.03878358  | 0.457857806 | down |
| ASMM9PARTA005692        |                  | 0.014156694 | 0.291304689 | down |
| ASMM9PARTA047498        | AK136919         | 0.002039174 | 0.476394033 | down |
| ASMM9PARTA001652        |                  | 0.006812644 | 0.43673529  | down |
| ASMM9PARTA008294        |                  | 0.043325778 | 0.386490607 | down |
| ASMM9PARTA017930        | 7SK.169          | 0.035324853 | 0.232516989 | down |
| ASMM9PARTA018321        | Gm16551          | 0.03162796  | 0.402431523 | down |
| ASMM9PARTA000071        |                  | 0.000868    | 0.477782014 | down |
| ASMM9PARTA001044        |                  | 0.002646316 | 0.432725057 | down |
| ASMM9PARTA001044        |                  | 0.002646316 | 0.432725057 | down |
| ASMM9PARTA001044        |                  | 0.002646316 | 0.432725057 | down |
| ASMM9PARTA001044        |                  | 0.002646316 | 0.432725057 | down |
| ASMM9PARTA001044        |                  | 0.002646316 | 0.432725057 | down |
| MM9LINCRNAEXON10675-_P1 | mouselincRNA1108 | 0.007772063 | 0.284974167 | down |
| ASMM9PARTA001873        |                  | 0.012272421 | 0.303759381 | down |
| ASMM9PARTA018910        | RP24-354E11.1    | 0.0000019   | 0.472389986 | down |
| ASMM9PARTA008053        |                  | 0.009012941 | 0.423539836 | down |
| ASMM9PARTA015543        | Gm16441          | 0.001360943 | 0.488982611 | down |
| ASMM9PARTA048438        | AK138161         | 0.024824593 | 0.359236049 | down |
| ASMM9PARTA048438        | AK138161         | 0.024824593 | 0.359236049 | down |
| ASMM9PARTA019335        | RP24-356D15.2    | 0.000209    | 0.478013277 | down |
| ASMM9PARTA017010        | B630019A10Rik    | 0.00064     | 0.374752336 | down |
| ASMM9PARTA047382        | AK006991         | 0.027023459 | 0.355345873 | down |
| ASMM9PARTA003369        |                  | 0.001440315 | 0.408838583 | down |
| ASMM9PARTA013415        | Gm14649          | 0.03413932  | 0.236582557 | down |
| ASMM9PARTA002592        |                  | 0.007200393 | 0.469146928 | down |
| MM9LINCRNAEXON11367-_P1 | mouselincRNA0586 | 0.000382    | 0.412672632 | down |
| ASMM9PARTA017429        | Gm7076           | 0.03618517  | 0.451580113 | down |
| ASMM9PARTA047473        | AK139027         | 0.003025994 | 0.279618811 | down |
| ASMM9PARTA018457        | Gm16556          | 0.008996647 | 0.239018321 | down |
| MM9LINCRNAEXON11480-_P1 |                  | 0.001316092 | 0.490732613 | down |
| ASMM9PARTA008027        |                  | 0.004890168 | 0.430078799 | down |
| ASMM9PARTA008027        |                  | 0.004890168 | 0.430078799 | down |
| mouselincRNA0052+_P1    | mouselincRNA0052 | 0.004712214 | 0.28765785  | down |
| ASMM9PARTA016152        | Gm8289           | 0.008333561 | 0.34473679  | down |
| ASMM9PARTA008473        |                  | 0.000726    | 0.322662279 | down |
| ASMM9PARTA018315        | 9930104L06Rik    | 0.003590496 | 0.477222527 | down |
| ASMM9PARTA018315        | 9930104L06Rik    | 0.003590496 | 0.477222527 | down |
| ASMM9PARTA002911        |                  | 0.010312071 | 0.386685191 | down |
| ASMM9PARTA018610        | RP23-189E15.2    | 0.013897288 | 0.49534794  | down |
| ASMM9PARTA015481        | C030037D09Rik    | 0.00000583  | 0.023873157 | down |

|                         |                  |             |             |      |
|-------------------------|------------------|-------------|-------------|------|
| ASMM9PARTA015481        | C030037D09Rik    | 0.00000583  | 0.023873157 | down |
| ASMM9PARTA045845        |                  | 0.009141183 | 0.092889931 | down |
| MM9LINCRNAEXON11914+_P1 | mouselincRNA0176 | 0.00000837  | 0.436005947 | down |
| ASMM9PARTA001738        |                  | 0.0000028   | 0.033517602 | down |
| ASMM9PARTA000825        |                  | 0.001556125 | 0.298312954 | down |
| ASMM9PARTA006500        |                  | 0.003987778 | 0.495960476 | down |
| ASMM9PARTA004842        |                  | 0.029647207 | 0.435426718 | down |
| MM9LINCRNAEXON10149+_P1 | mouselincRNA1571 | 0.000667    | 0.459404872 | down |
| ASMM9PARTA045672        | 6330407A03Rik    | 0.000148    | 0.388389032 | down |
| ASMM9PARTA045672        | 6330407A03Rik    | 0.000148    | 0.388389032 | down |
| ASMM9PARTA014773        | 1700027L20Rik    | 0.0000427   | 0.221144966 | down |
| CUST_932_P1426073487    | uc.453           | 0.002485754 | 0.43048124  | down |
| ASMM9PARTA046864        | Ywhae            | 0.0000289   | 0.381040695 | down |
| ASMM9PARTA047397        | Slc38a6          | 0.004971354 | 0.253074091 | down |
| ASMM9PARTA047397        | Slc38a6          | 0.004971354 | 0.253074091 | down |
| ASMM9PARTA002040        |                  | 0.001330059 | 0.330678241 | down |
| ASMM9PARTA009851        | Gm10087          | 0.001494038 | 0.485861409 | down |
| ASMM9PARTA006426        |                  | 0.001173553 | 0.17018434  | down |
| ASMM9PARTA045115        | 4933432I09Rik    | 0.000175    | 0.347577282 | down |
| CUST_138_P1426409190    |                  | 0.000614    | 0.484337424 | down |
| MM9LINCRNAEXON10703-_P1 | mouselincRNA1121 | 0.001971603 | 0.451543165 | down |
| ASMM9PARTA007243        |                  | 0.000372    | 0.496123096 | down |
| ASMM9PARTA019094        | AL670236.3       | 0.000487    | 0.415589891 | down |
| ASMM9PARTA015161        | AI838599         | 0.001767402 | 0.441870714 | down |
| ASMM9PARTA017307        | Gm15351          | 0.024890687 | 0.445217302 | down |
| CUST_700_P1426073487    | uc.221           | 0.003391748 | 0.395589494 | down |
| ASMM9PARTA005418        |                  | 0.013872084 | 0.487288875 | down |
| ASMM9PARTA005418        |                  | 0.013872084 | 0.487288875 | down |
| BQ128792_P1             | humanlincRNA1677 | 0.0000354   | 0.162894739 | down |
| ASMM9PARTA049459        | AK136882         | 0.001072609 | 0.364516598 | down |
| ASMM9PARTA007323        |                  | 0.0358005   | 0.484621506 | down |
| ASMM9PARTA015587        | Gm14453          | 0.003357813 | 0.473975386 | down |
| ASMM9PARTA008144        |                  | 0.011306209 | 0.306258415 | down |
| ASMM9PARTA050807        | AK038589         | 0.001230427 | 0.393178974 | down |
| ASMM9PARTA001615        |                  | 0.0000583   | 0.34569515  | down |
| ASMM9PARTA006877        |                  | 0.011310122 | 0.349208198 | down |
| ASMM9PARTA051573        | AK048941         | 0.004146529 | 0.492462662 | down |
| ASMM9PARTA051573        | AK048941         | 0.004146529 | 0.492462662 | down |
| ASMM9PARTA051573        | AK048941         | 0.004146529 | 0.492462662 | down |
| ASMM9PARTA051573        | AK048941         | 0.004146529 | 0.492462662 | down |
| ASMM9PARTA004356        |                  | 0.006129209 | 0.488213715 | down |
| ASMM9PARTA015758        | Gm11789          | 0.00011     | 0.238154193 | down |
| humanlincRNA2149-_P1    | humanlincRNA2149 | 0.025311101 | 0.400653337 | down |
| ASMM9PARTA015015        | H2-Ea-ps         | 0.000103    | 0.021976573 | down |
| ASMM9PARTA014858        | A830009L08Rik    | 0.000015    | 0.449145097 | down |
| ASMM9PARTA011232        | Gm14783          | 0.00776232  | 0.451325636 | down |
| ASMM9PARTA015585        | Gm14344          | 0.045442495 | 0.499157123 | down |
| ASMM9PARTA008461        |                  | 0.000609    | 0.224526372 | down |
| ASMM9PARTA051102        | AK015772         | 0.006911601 | 0.310632005 | down |

|                         |                  |             |             |      |
|-------------------------|------------------|-------------|-------------|------|
| ASMM9PARTA001540        |                  | 0.014438592 | 0.47958284  | down |
| humanlincRNA2212-_P1    | humanlincRNA2212 | 0.03744507  | 0.487002773 | down |
| ASMM9PARTA004677        |                  | 0.011457424 | 0.396525485 | down |
| ASMM9PARTA005377        |                  | 0.011243109 | 0.426304124 | down |
| ASMM9PARTA005559        |                  | 0.045271896 | 0.471589937 | down |
| ASMM9PARTA051330        | Ttc13            | 0.00000314  | 0.339876581 | down |
| ASMM9PARTA009639        | Setd1b           | 0.002071896 | 0.353694175 | down |
| ASMM9PARTA045562        | Deaf1            | 0.005822519 | 0.180606444 | down |
| ASMM9PARTA045562        | Deaf1            | 0.005822519 | 0.180606444 | down |
| ASMM9PARTA045562        | Deaf1            | 0.005822519 | 0.180606444 | down |
| ASMM9PARTA045562        | Deaf1            | 0.005822519 | 0.180606444 | down |
| MM9LINCRNAEXON10699+_P1 | mouselincRNA1121 | 0.0000132   | 0.491848206 | down |
| MM9LINCRNAEXON12072+_P1 | mouselincRNA0095 | 0.000307    | 0.380424699 | down |
| ASMM9PARTA049498        | AK005639         | 0.000691    | 0.399818275 | down |
| ASMM9PARTA017358        | Gm13883          | 0.000385    | 0.407199001 | down |
| ASMM9PARTA017519        | 6530402F18Rik    | 0.022502145 | 0.493795167 | down |
| ASMM9PARTA050491        | AK018014         | 0.0000515   | 0.498346337 | down |
| ASMM9PARTA007912        |                  | 0.015671153 | 0.186919417 | down |
| MM9LINCRNAEXON11862-_P1 | mouselincRNA0283 | 0.011061511 | 0.469457737 | down |
| ASMM9PARTA009532        | 4930515G13Rik    | 0.010874454 | 0.391014304 | down |
| humanlincRNA1527+_P1    | humanlincRNA1527 | 0.02555595  | 0.452410488 | down |
| ASMM9PARTA008669        |                  | 0.008589326 | 0.268293167 | down |
| ASMM9PARTA006629        |                  | 0.000138    | 0.384235007 | down |
| MM9LINCRNAEXON10128-_P1 | mouselincRNA1558 | 0.000393    | 0.469900014 | down |
| ASMM9PARTA003873        |                  | 0.001601955 | 0.349783769 | down |
| ASMM9PARTA012580        | Gm4746           | 0.005804983 | 0.316864783 | down |
| ASMM9PARTA012491        | Gm8084           | 0.023236088 | 0.399023685 | down |
| MM9LINCRNAEXON10572+_P1 |                  | 0.00000394  | 0.218752453 | down |
| ASMM9PARTA002100        |                  | 0.000491    | 0.387069854 | down |
| ASMM9PARTA006636        |                  | 0.001580883 | 0.366134734 | down |
| ASMM9PARTA005279        |                  | 0.012363432 | 0.454546529 | down |
| ASMM9PARTA049296        | AK042718         | 0.001576831 | 0.415977877 | down |
| ASMM9PARTA002205        |                  | 0.000413    | 0.303456273 | down |
| MM9LINCRNAEXON10133-_P1 |                  | 0.000366    | 0.079783379 | down |
| ASMM9PARTA048644        | mKIAA0007        | 0.000323    | 0.499595977 | down |
| ASMM9PARTA048647        | AK053722         | 0.020272028 | 0.489608788 | down |
| ASMM9PARTA005267        |                  | 0.018825293 | 0.473144888 | down |
| ASMM9PARTA011388        | Gm11566          | 0.0000186   | 0.423416956 | down |
| humanlincRNA1524-_P1    | humanlincRNA1524 | 0.017975576 | 0.318420096 | down |
| ASMM9PARTA045134        | Gm5468           | 0.000463    | 0.451035578 | down |
| mouselincRNA0052-_P1    | mouselincRNA0052 | 0.00000179  | 0.476686684 | down |
| mouselincRNA0166-_P1    | mouselincRNA0166 | 0.045095038 | 0.295663043 | down |
| ASMM9PARTA009224        | 1700027L20Rik    | 0.00000471  | 0.240607988 | down |
| ASMM9PARTA011640        | Gm14631          | 0.000338    | 0.374404145 | down |
| ASMM9PARTA009329        |                  | 0.013398703 | 0.452567775 | down |
| ASMM9PARTA008950        |                  | 0.002322083 | 0.154454801 | down |
| humanlincRNA0588+_P1    | humanlincRNA0588 | 0.016839711 | 0.346574225 | down |
| BG808609_P1             | humanlincRNA0438 | 0.003797978 | 0.489305135 | down |
| mouselincRNA1656+_P1    | mouselincRNA1656 | 0.026321959 | 0.456037526 | down |

|                         |                  |             |             |      |
|-------------------------|------------------|-------------|-------------|------|
| ASMM9PARTA010572        | Gm12378          | 0.010290162 | 0.482933283 | down |
| ASMM9PARTA004342        |                  | 0.003810819 | 0.457666721 | down |
| ASMM9PARTA005983        |                  | 0.023021948 | 0.331175636 | down |
| ASMM9PARTA017566        | Gm15344          | 0.0003      | 0.405236071 | down |
| CF586746_P1             | humanlincRNA0707 | 0.012940467 | 0.469537796 | down |
| CF586746_P1             | humanlincRNA0707 | 0.012940467 | 0.469537796 | down |
| CF586746_P1             | humanlincRNA0707 | 0.012940467 | 0.469537796 | down |
| CF586746_P1             | humanlincRNA0707 | 0.012940467 | 0.469537796 | down |
| CF586746_P1             | humanlincRNA0707 | 0.012940467 | 0.469537796 | down |
| CF586746_P1             | humanlincRNA0707 | 0.012940467 | 0.469537796 | down |
| CF586746_P1             | humanlincRNA0707 | 0.012940467 | 0.469537796 | down |
| CF586746_P1             | humanlincRNA0707 | 0.012940467 | 0.469537796 | down |
| CF586746_P1             | humanlincRNA0707 | 0.012940467 | 0.469537796 | down |
| CF586746_P1             | humanlincRNA0707 | 0.012940467 | 0.469537796 | down |
| mouselincRNA0750_P1     | mouselincRNA0750 | 0.000155    | 0.330458433 | down |
| MM9LINCRNAEXON10551+_P1 | mouselincRNA1185 | 0.0000325   | 0.300137145 | down |
| ASMM9PARTA004866        |                  | 0.006055214 | 0.350850381 | down |
| ASMM9PARTA004866        |                  | 0.006055214 | 0.350850381 | down |
| ASMM9PARTA050339        | BC100494         | 0.000666    | 0.349061778 | down |
| ASMM9PARTA047110        | BC027544         | 0.000135    | 0.464182215 | down |
| ASMM9PARTA047110        | BC027544         | 0.000135    | 0.464182215 | down |
| ASMM9PARTA005774        |                  | 0.000115    | 0.445953949 | down |
| ASMM9PARTA003686        |                  | 0.006890012 | 0.404503843 | down |
| ASMM9PARTA001544        |                  | 0.0000822   | 0.276324961 | down |
| ASMM9PARTA018908        | AC124108.1       | 0.0000879   | 0.289037139 | down |
| ASMM9PARTA048969        | Ahnak            | 0.028780313 | 0.499330473 | down |
| ASMM9PARTA048969        | Ahnak            | 0.028780313 | 0.499330473 | down |
| ASMM9PARTA008853        |                  | 0.00046     | 0.302225029 | down |
| ASMM9PARTA009320        |                  | 0.011067352 | 0.414752583 | down |
| ASMM9PARTA047731        | CSA              | 0.004093475 | 0.492028353 | down |
| ASMM9PARTA047731        | CSA              | 0.004093475 | 0.492028353 | down |
| ASMM9PARTA000534        |                  | 0.0000225   | 0.277677212 | down |
| ASMM9PARTA050559        | TCR-beta chain   | 0.000000571 | 0.486543591 | down |
| ASMM9PARTA045691        | C030023E24Rik    | 0.000046    | 0.422710243 | down |
| ASMM9PARTA015780        | Gm16899          | 0.00000338  | 0.47927787  | down |
| ASMM9PARTA048522        | AK008384         | 0.0000548   | 0.498469748 | down |
| ASMM9PARTA048468        | Adamts10         | 0.043763135 | 0.447672061 | down |
| ASMM9PARTA011523        | Olfr1315-ps1     | 0.000994    | 0.21948924  | down |
| ASMM9PARTA002507        |                  | 0.0000234   | 0.450117931 | down |
| ASMM9PARTA002507        |                  | 0.0000234   | 0.450117931 | down |
| ASMM9PARTA002507        |                  | 0.0000234   | 0.450117931 | down |
| ASMM9PARTA007137        |                  | 0.000879    | 0.344811107 | down |
| mouselincRNA0499+_P1    | mouselincRNA0499 | 0.0000318   | 0.454865514 | down |
| ASMM9PARTA017215        | 1500002F19Rik    | 0.000205    | 0.346175139 | down |
| ASMM9PARTA018399        | AC102317.1       | 0.003320135 | 0.46534367  | down |
| BC156060_P1             | mouselincRNA1038 | 0.000133    | 0.47322247  | down |
| BC156060_P1             | mouselincRNA1038 | 0.000133    | 0.47322247  | down |
| BC156060_P1             | mouselincRNA1038 | 0.000133    | 0.47322247  | down |
| BC156060_P1             | mouselincRNA1038 | 0.000133    | 0.47322247  | down |

|                         |                  |             |             |      |
|-------------------------|------------------|-------------|-------------|------|
| BC156060_P1             | mouselincRNA1038 | 0.000133    | 0.47322247  | down |
| MM9LINCRNAEXON11766+_P1 | mouselincRNA0239 | 0.000215    | 0.297064465 | down |
| ASMM9PARTA000466        |                  | 0.036914453 | 0.290658554 | down |
| MM9LINCRNAEXON10104+_P1 |                  | 0.000593    | 0.363998774 | down |
| ASMM9PARTA015299        | Gm12940          | 0.00000414  | 0.495207432 | down |
| ASMM9PARTA045068        | 4930558C23Rik    | 0.013556981 | 0.39604867  | down |
| MM9LINCRNAEXON10083+_P1 | mouselincRNA1506 | 0.0000198   | 0.460631443 | down |
| MM9LINCRNAEXON11272+_P1 | mouselincRNA0626 | 0.003659791 | 0.480359309 | down |
| ASMM9PARTA010963        | Gm12941          | 0.000181    | 0.359188564 | down |
| ASMM9PARTA006968        |                  | 0.016136985 | 0.302468756 | down |
| ASMM9PARTA017569        | Gm12081          | 0.000749    | 0.115529178 | down |
| ASMM9PARTA011163        | Gpr144           | 0.009776521 | 0.416087715 | down |
| mouselincRNA0570-_P1    | mouselincRNA0570 | 0.00000246  | 0.48612561  | down |
| ASMM9PARTA008696        |                  | 0.000174    | 0.399640164 | down |
| ASMM9PARTA014023        | Gm13147          | 0.000285    | 0.474448865 | down |
| ASMM9PARTA045902        | Gm16287          | 0.0391789   | 0.401970378 | down |
| ASMM9PARTA007823        |                  | 0.0000734   | 0.324226376 | down |
| ASMM9PARTA014881        | Mir17hg          | 0.000000729 | 0.178390521 | down |
| ASMM9PARTA017438        | Gm11940          | 0.0000252   | 0.33986243  | down |
| ASMM9PARTA003703        |                  | 0.000145    | 0.393924114 | down |
| ASMM9PARTA012978        | Gm15188          | 0.001961787 | 0.343265032 | down |
| humanlincRNA0219+_P1    | humanlincRNA0219 | 0.000137    | 0.338530648 | down |
| ASMM9PARTA048267        | Tcte2            | 0.000386    | 0.414836202 | down |
| ASMM9PARTA048267        | Tcte2            | 0.000386    | 0.414836202 | down |
| ASMM9PARTA000047        |                  | 0.000103    | 0.077911547 | down |
| ASMM9PARTA019614        | CT571259.1       | 0.005521244 | 0.384955271 | down |
| MM9LINCRNAEXON11266+_P1 | mouselincRNA0611 | 0.000302    | 0.482072449 | down |
| CUST_417_P1426073487    | uc.419           | 0.003995812 | 0.361092135 | down |
| CUST_417_P1426073487    | uc.419           | 0.003995812 | 0.361092135 | down |
| ASMM9PARTA003255        |                  | 0.00000375  | 0.451977973 | down |
| ASMM9PARTA046888        | AK140919         | 0.04342912  | 0.412120123 | down |
| ASMM9PARTA046888        | AK140919         | 0.04342912  | 0.412120123 | down |
| ASMM9PARTA046888        | AK140919         | 0.04342912  | 0.412120123 | down |
| ASMM9PARTA046888        | AK140919         | 0.04342912  | 0.412120123 | down |
| MM9LINCRNAEXON11907+_P1 | mouselincRNA0173 | 0.0000184   | 0.359910271 | down |
| CUST_338_P1426073487    | uc.340           | 0.008479083 | 0.447244973 | down |
| ASMM9PARTA008362        |                  | 0.045565672 | 0.464115323 | down |
| ASMM9PARTA045931        | Lrch4-sap25      | 0.010437384 | 0.392545252 | down |
| ASMM9PARTA045931        | Lrch4-sap25      | 0.010437384 | 0.392545252 | down |
| ASMM9PARTA045931        | Lrch4-sap25      | 0.010437384 | 0.392545252 | down |
| CUST_377_P1426073487    | uc.379           | 0.000755    | 0.253667126 | down |
| ASMM9PARTA012487        | Gm14054          | 0.003452617 | 0.144087139 | down |
| ASMM9PARTA014754        | Gm6277           | 0.000528    | 0.161877714 | down |
| ASMM9PARTA014754        | Gm6277           | 0.000528    | 0.161877714 | down |
| ASMM9PARTA009187        |                  | 0.000573    | 0.459405379 | down |
| MM9LINCRNAEXON11776-_P1 | mouselincRNA0243 | 0.011599883 | 0.444094754 | down |
| ASMM9PARTA002906        |                  | 0.0000429   | 0.410777537 | down |
| humanlincRNA0034-_P1    | humanlincRNA0034 | 0.013223419 | 0.492998388 | down |
| ASMM9PARTA008341        |                  | 0.037641805 | 0.318367838 | down |



|                         |                  |             |             |      |
|-------------------------|------------------|-------------|-------------|------|
| ASMM9PARTA000224        |                  | 0.034341156 | 0.323338969 | down |
| ASMM9PARTA000224        |                  | 0.034341156 | 0.323338969 | down |
| ASMM9PARTA002055        |                  | 0.000447    | 0.151165501 | down |
| ASMM9PARTA003639        |                  | 0.00019     | 0.404253229 | down |
| humanlincRNA1082+_P1    | humanlincRNA1082 | 0.004578662 | 0.38300526  | down |
| ASMM9PARTA000149        |                  | 0.010409152 | 0.19913694  | down |
| ASMM9PARTA049191        | A230067G21Rik    | 0.010616894 | 0.384798786 | down |
| CUST_179_PI426073487    | uc.181           | 0.018138608 | 0.397397302 | down |
| ASMM9PARTA050392        | M34473           | 0.000000629 | 0.122071102 | down |
| ASMM9PARTA002466        |                  | 0.00036     | 0.437972956 | down |
| ASMM9PARTA004363        |                  | 0.026345985 | 0.204381907 | down |
| ASMM9PARTA011773        | Gm12135          | 0.04528992  | 0.481581089 | down |
| ASMM9PARTA002294        |                  | 0.0000646   | 0.320819697 | down |
| mouselincRNA0464-_P1    | mouselincRNA0464 | 0.004958587 | 0.442761753 | down |
| ASMM9PARTA006892        |                  | 0.023778234 | 0.417326651 | down |
| ASMM9PARTA012774        | Gm15428          | 0.000108    | 0.491206302 | down |
| ASMM9PARTA000934        |                  | 0.00000437  | 0.412450614 | down |
| ASMM9PARTA047992        | AK043393         | 0.000142    | 0.406322442 | down |
| ASMM9PARTA007256        |                  | 0.010065827 | 0.452734926 | down |
| ASMM9PARTA009861        | Gm14164          | 0.005539357 | 0.4140521   | down |
| ASMM9PARTA048582        | BC030050         | 0.000128    | 0.368828068 | down |
| ASMM9PARTA048582        | BC030050         | 0.000128    | 0.368828068 | down |
| ASMM9PARTA008024        |                  | 0.026894582 | 0.300904395 | down |
| ASMM9PARTA045716        | 1600029O15Rik    | 0.02185933  | 0.445340628 | down |
| ASMM9PARTA045716        | 1600029O15Rik    | 0.02185933  | 0.445340628 | down |
| ASMM9PARTA045716        | 1600029O15Rik    | 0.02185933  | 0.445340628 | down |
| ASMM9PARTA045716        | 1600029O15Rik    | 0.02185933  | 0.445340628 | down |
| ASMM9PARTA045716        | 1600029O15Rik    | 0.02185933  | 0.445340628 | down |
| ASMM9PARTA005021        |                  | 0.034613617 | 0.427891875 | down |
| ASMM9PARTA005021        |                  | 0.034613617 | 0.427891875 | down |
| MM9LINCRNAEXON10013+_P1 | mouselincRNA1614 | 0.008607643 | 0.329376056 | down |
| ASMM9PARTA005194        |                  | 0.00000746  | 0.486538407 | down |
| ASMM9PARTA014192        | 4930511A02Rik    | 0.008606721 | 0.395560654 | down |
| ASMM9PARTA047841        | AK086741         | 0.000021    | 0.437520383 | down |
| ASMM9PARTA009136        |                  | 0.000695    | 0.100548957 | down |
| MM9LINCRNAEXON10204-_P1 | mouselincRNA1471 | 0.000153    | 0.161505385 | down |
| ASMM9PARTA005458        |                  | 0.000218    | 0.482747404 | down |
| ASMM9PARTA051821        |                  | 0.012466883 | 0.279174075 | down |
| ASMM9PARTA012454        | Gm13230          | 0.000607    | 0.049574723 | down |
| ASMM9PARTA003479        |                  | 0.001283588 | 0.44298166  | down |
| ASMM9PARTA007030        |                  | 0.000224    | 0.476168708 | down |
| ASMM9PARTA048949        | AK170301         | 0.000116    | 0.058740084 | down |
| CUST_149_PI426073487    | uc.151           | 0.01611484  | 0.395704438 | down |
| ASMM9PARTA014138        | Gm15345          | 0.020396754 | 0.465242652 | down |
| CUST_30_PI426073487     | uc.31            | 0.011659533 | 0.49755452  | down |
| MM9LINCRNAEXON11324+_P1 |                  | 0.005612009 | 0.479999846 | down |
| ASMM9PARTA049352        | BC038520         | 0.000749    | 0.488195077 | down |
| ASMM9PARTA019132        | 9230115E21Rik    | 0.0000029   | 0.05388922  | down |
| ASMM9PARTA051652        | AK136006         | 0.001508328 | 0.397145319 | down |

|                         |                  |             |             |      |
|-------------------------|------------------|-------------|-------------|------|
| ASMM9PARTA016802        | 1700029M20Rik    | 0.030142656 | 0.445221544 | down |
| ASMM9PARTA046610        | BC065048         | 0.00000204  | 0.407713449 | down |
| ASMM9PARTA000310        |                  | 0.002698028 | 0.128770016 | down |
| MM9LINCRNAEXON10816-_P1 |                  | 0.00000897  | 0.490901991 | down |
| BY300155_P1             | humanlincRNA1943 | 0.004361909 | 0.476623137 | down |
| CUST_161_P1426409190    |                  | 0.0000796   | 0.335716856 | down |
| ASMM9PARTA050748        | AK014378         | 0.020210154 | 0.400280356 | down |
| ASMM9PARTA015195        | 0610005C13Rik    | 0.001260763 | 0.458477609 | down |
| ASMM9PARTA046987        | AK172386         | 0.00000967  | 0.488294077 | down |
| ASMM9PARTA046987        | AK172386         | 0.00000967  | 0.488294077 | down |
| ASMM9PARTA018235        | 7SK.234          | 0.000729    | 0.442379417 | down |
| ASMM9PARTA005211        |                  | 0.00000119  | 0.127643116 | down |
| ASMM9PARTA019009        | AC154675.1       | 0.011399932 | 0.427618328 | down |
| ASMM9PARTA006534        |                  | 0.0000234   | 0.494633963 | down |
| ASMM9PARTA047508        | mKIAA4205        | 0.000141    | 0.472979598 | down |
| ASMM9PARTA047508        | mKIAA4205        | 0.000141    | 0.472979598 | down |
| CUST_699_P1426073487    | uc.220           | 0.003879945 | 0.346881399 | down |
| ASMM9PARTA006060        |                  | 0.006457548 | 0.379811298 | down |
| ASMM9PARTA015401        | 4930583K01Rik    | 0.000534    | 0.395203775 | down |
| ASMM9PARTA009296        | Gm8615           | 0.00000297  | 0.382410845 | down |
| ASMM9PARTA018654        | Ear-ps9          | 0.00594653  | 0.264196325 | down |
| ASMM9PARTA048567        | wtap             | 0.000068    | 0.358985736 | down |
| humanlincRNA0849-_P1    | humanlincRNA0849 | 0.008020902 | 0.344298257 | down |
| ASMM9PARTA051806        | Smcy             | 0.000225    | 0.465576268 | down |
| CUST_223_P1426073487    | uc.225           | 0.020562151 | 0.49322112  | down |
| CUST_223_P1426073487    | uc.225           | 0.020562151 | 0.49322112  | down |
| ASMM9PARTA014337        | Gm16867          | 0.00000229  | 0.349896831 | down |
| ASMM9PARTA014337        | Gm16867          | 0.00000229  | 0.349896831 | down |
| ASMM9PARTA014337        | Gm16867          | 0.00000229  | 0.349896831 | down |
| ASMM9PARTA014337        | Gm16867          | 0.00000229  | 0.349896831 | down |
| ASMM9PARTA045609        | Gm10649          | 0.005296455 | 0.431069136 | down |
| ASMM9PARTA050130        | AK152437         | 0.000239    | 0.474923787 | down |
| ASMM9PARTA015586        | Gm16295          | 0.000153    | 0.457485715 | down |
| mouselincRNA0963+_P1    | mouselincRNA0963 | 0.002121049 | 0.30314106  | down |
| ASMM9PARTA014230        | C030037D09Rik    | 0.0000309   | 0.183574567 | down |
| CF545245_P1             | humanlincRNA1294 | 0.003085945 | 0.375109673 | down |
| ASMM9PARTA010625        | Gm15087          | 0.001002297 | 0.23369766  | down |
| ASMM9PARTA007684        |                  | 0.012269583 | 0.467972697 | down |
| ASMM9PARTA015518        | Gm15606          | 0.001584072 | 0.425599975 | down |
| ASMM9PARTA006932        |                  | 0.000701    | 0.443333156 | down |
| ASMM9PARTA009357        | H2-Ea-ps         | 0.000611    | 0.309340091 | down |
| ASMM9PARTA016911        | Gm15246          | 0.002087223 | 0.496734468 | down |
| ASMM9PARTA015172        | Gm13257          | 0.03641189  | 0.449612046 | down |
| ASMM9PARTA050692        | Mrmt1            | 0.0000492   | 0.438261586 | down |
| ASMM9PARTA005609        |                  | 0.010279777 | 0.417379655 | down |
| ASMM9PARTA014533        | Gm16731          | 0.006665989 | 0.329612427 | down |
| ASMM9PARTA014533        | Gm16731          | 0.006665989 | 0.329612427 | down |
| ASMM9PARTA014533        | Gm16731          | 0.006665989 | 0.329612427 | down |
| ASMM9PARTA018464        | Gm12759          | 0.00000803  | 0.489419317 | down |

|                          |                  |             |             |      |
|--------------------------|------------------|-------------|-------------|------|
| mouselincRNA1170- _P1    | mouselincRNA1170 | 0.024690907 | 0.42585912  | down |
| MM9LINCRNAEXON10352- _P1 |                  | 0.0000558   | 0.440884255 | down |
| ASMM9PARTA045668         | Hhatl            | 0.00600032  | 0.211631254 | down |
| ASMM9PARTA048570         | AK018977         | 0.0000245   | 0.492678599 | down |
| mouselincRNA1407+ _P1    | mouselincRNA1407 | 0.03384627  | 0.450267463 | down |
| ASMM9PARTA013915         | Gm11648          | 0.0000569   | 0.139955827 | down |
| ASMM9PARTA013915         | Gm11648          | 0.0000569   | 0.139955827 | down |
| CUST_380_PI426073487     | uc.382           | 0.013810853 | 0.362283321 | down |
| MM9LINCRNAEXON11889+ _P1 | mouselincRNA0159 | 0.000143    | 0.273824123 | down |
| ASMM9PARTA002161         |                  | 0.000000357 | 0.160043378 | down |
| ASMM9PARTA012184         | Xlr3e-ps         | 0.0000157   | 0.453576862 | down |
| mouselincRNA1555+ _P1    | mouselincRNA1555 | 0.017862892 | 0.378975385 | down |
| ASMM9PARTA013285         | Gm14848          | 0.001688507 | 0.447741874 | down |
| ASMM9PARTA003746         |                  | 0.000406    | 0.360871055 | down |
| ASMM9PARTA045912         |                  | 0.000365    | 0.076809517 | down |
| ASMM9PARTA045222         | AI450353         | 0.000000561 | 0.125600174 | down |
| ASMM9PARTA014504         | 8430419K02Rik    | 0.04490643  | 0.385025629 | down |
| AA797690 _P1             | mouselincRNA1236 | 0.043949436 | 0.336325736 | down |
| MM9LINCRNAEXON10076- _P1 | mouselincRNA1506 | 0.007722864 | 0.483262447 | down |
| ASMM9PARTA009966         | Olf663           | 0.000616    | 0.479172067 | down |
| ASMM9PARTA006074         |                  | 0.00049     | 0.174306552 | down |
| MM9LINCRNAEXON10276- _P1 | mouselincRNA1493 | 0.044340193 | 0.400187544 | down |
| ASMM9PARTA013872         | Gm11985          | 0.008604638 | 0.359987141 | down |
| ASMM9PARTA004494         |                  | 0.006725606 | 0.441619902 | down |
| ASMM9PARTA001713         |                  | 0.001527407 | 0.486180442 | down |
| ASMM9PARTA047429         | AK035761         | 0.001191142 | 0.395658002 | down |
| MM9LINCRNAEXON11073+ _P1 | mouselincRNA0818 | 0.037518453 | 0.41061772  | down |
| ASMM9PARTA007253         |                  | 0.00596165  | 0.468153178 | down |
| MM9LINCRNAEXON12078- _P1 | mouselincRNA0097 | 0.0000717   | 0.406551612 | down |
| ASMM9PARTA013810         | 1500026H17Rik    | 0.000101    | 0.381765141 | down |
| ASMM9PARTA051476         | AK043361         | 0.0000163   | 0.159011736 | down |
| ASMM9PARTA009937         | 1700026J12Rik    | 0.014855156 | 0.353994782 | down |
| CUST_416_PI426073487     | uc.418           | 0.0000185   | 0.405813358 | down |
| CUST_416_PI426073487     | uc.418           | 0.0000185   | 0.405813358 | down |
| BB202824 _P1             | mouselincRNA0958 | 0.00022     | 0.301847363 | down |
| ASMM9PARTA009842         | Fzd10            | 0.000555    | 0.483549501 | down |
| ASMM9PARTA046419         | AK030763         | 0.000375    | 0.488566756 | down |
| ASMM9PARTA006336         |                  | 0.009015284 | 0.342247395 | down |
| ASMM9PARTA014441         | Gm15619          | 0.01389206  | 0.480857496 | down |
| ASMM9PARTA009012         |                  | 0.0000313   | 0.37537708  | down |
| ASMM9PARTA009972         | Gm807            | 0.01793847  | 0.381970576 | down |
| ASMM9PARTA000027         |                  | 0.001488198 | 0.153417263 | down |
| ASMM9PARTA046533         | Spatial          | 0.000803    | 0.274039378 | down |
| ASMM9PARTA046533         | Spatial          | 0.000803    | 0.274039378 | down |
| ASMM9PARTA046533         | Spatial          | 0.000803    | 0.274039378 | down |
| ASMM9PARTA046533         | Spatial          | 0.000803    | 0.274039378 | down |
| ASMM9PARTA046533         | Spatial          | 0.000803    | 0.274039378 | down |
| ASMM9PARTA046533         | Spatial          | 0.000803    | 0.274039378 | down |
| mouselincRNA1284- _P1    | mouselincRNA1284 | 0.023888398 | 0.43662063  | down |

|                         |                  |             |             |      |
|-------------------------|------------------|-------------|-------------|------|
| ASMM9PARTA002943        |                  | 0.000181    | 0.45819313  | down |
| ASMM9PARTA002729        |                  | 0.004080148 | 0.438781549 | down |
| mouselincRNA0362+_P1    | mouselincRNA0362 | 0.001024091 | 0.4650308   | down |
| ASMM9PARTA018204        | AU015336         | 0.003257209 | 0.396053282 | down |
| ASMM9PARTA003994        |                  | 0.004302118 | 0.250503763 | down |
| ASMM9PARTA046088        | AK038933         | 0.014618578 | 0.489841544 | down |
| ASMM9PARTA006885        |                  | 0.0000131   | 0.474909036 | down |
| ASMM9PARTA045510        | AA465934         | 8.71E-08    | 0.032668283 | down |
| ASMM9PARTA015947        | Gm12766          | 0.01046971  | 0.457966674 | down |
| humanlincRNA0288-_P1    | humanlincRNA0288 | 0.041815788 | 0.499016937 | down |
| ASMM9PARTA016697        | 4930412C18Rik    | 0.000109    | 0.361271441 | down |
| MM9LINCRNAEXON10592-_P1 | mouselincRNA1215 | 0.003916962 | 0.473027588 | down |
| ASMM9PARTA010513        | Gm14756          | 0.001945664 | 0.481852937 | down |
| humanlincRNA2300+_P1    | humanlincRNA2300 | 0.004077318 | 0.374071461 | down |
| ASMM9PARTA015118        | E130218I03Rik    | 0.0000955   | 0.471291935 | down |
| ASMM9PARTA008653        |                  | 0.02055635  | 0.42165687  | down |
| AA762819_P1             | mouselincRNA0620 | 0.0000452   | 0.495304391 | down |
| ASMM9PARTA019857        |                  | 0.0000024   | 0.052299948 | down |
| ASMM9PARTA000659        |                  | 0.00000142  | 0.127091933 | down |
| ASMM9PARTA016129        | Gm12052          | 0.000946    | 0.496626121 | down |
| ASMM9PARTA008115        |                  | 0.000066    | 0.4596002   | down |
| ASMM9PARTA016334        | 4930426D05Rik    | 0.000442    | 0.417698731 | down |
| ASMM9PARTA011020        | Olfr587-ps1      | 0.0000173   | 0.452106443 | down |
| ASMM9PARTA048519        | AK020087         | 0.000022    | 0.206085359 | down |
| ASMM9PARTA019605        | BC006965         | 0.0000749   | 0.085877431 | down |
| ASMM9PARTA049719        | Ubx3             | 0.001560129 | 0.455276546 | down |
| ASMM9PARTA049719        | Ubx3             | 0.001560129 | 0.455276546 | down |
| ASMM9PARTA049957        | AK037159         | 0.007303125 | 0.468762334 | down |
| ASMM9PARTA049957        | AK037159         | 0.007303125 | 0.468762334 | down |
| ASMM9PARTA045865        | Rmi1             | 0.000027    | 0.46352821  | down |
| ASMM9PARTA045865        | Rmi1             | 0.000027    | 0.46352821  | down |
| ASMM9PARTA045865        | Rmi1             | 0.000027    | 0.46352821  | down |
| ASMM9PARTA015580        | Gm16194          | 0.001408998 | 0.490612618 | down |
| ASMM9PARTA019172        | RP24-486L9.1     | 0.0000199   | 0.125848455 | down |
| ASMM9PARTA019172        | RP24-486L9.1     | 0.0000199   | 0.125848455 | down |
| humanlincRNA1992+_P1    | humanlincRNA1992 | 0.01292699  | 0.485081418 | down |
| ASMM9PARTA007772        |                  | 0.01841998  | 0.393336378 | down |
| ASMM9PARTA050826        | Flt3l            | 0.0000534   | 0.499682452 | down |
| ASMM9PARTA000568        |                  | 0.000054    | 0.389428663 | down |
| MM9LINCRNAEXON10678-_P1 | mouselincRNA1108 | 0.000864    | 0.383320469 | down |
| ASMM9PARTA049468        | BC055065         | 0.003232447 | 0.498902589 | down |
| ASMM9PARTA015743        | Gm16885          | 0.013186666 | 0.315818592 | down |
| ASMM9PARTA015743        | Gm16885          | 0.013186666 | 0.315818592 | down |
| ASMM9PARTA002184        |                  | 0.00000148  | 0.189728634 | down |
| ASMM9PARTA012007        | Gm13105          | 0.0000663   | 0.389486346 | down |
| ASMM9PARTA046745        | AK043075         | 0.0000294   | 0.418773797 | down |
| ASMM9PARTA009360        | Gm8935           | 0.00000596  | 0.167253224 | down |
| ASMM9PARTA005358        |                  | 0.000017    | 0.497060459 | down |
| ASMM9PARTA008328        |                  | 0.000827    | 0.408987484 | down |

|                         |                  |             |             |      |
|-------------------------|------------------|-------------|-------------|------|
| ASMM9PARTA049425        | AK047534         | 0.000586    | 0.180410368 | down |
| ASMM9PARTA017505        | Gprc2a-rs5       | 0.000132    | 0.496382735 | down |
| ASMM9PARTA017371        | Gm13236          | 0.0000567   | 0.43896422  | down |
| ASMM9PARTA011045        | Gm13606          | 0.000329    | 0.447446312 | down |
| ASMM9PARTA047769        | AK015236         | 0.007197172 | 0.350960377 | down |
| ASMM9PARTA047769        | AK015236         | 0.007197172 | 0.350960377 | down |
| ASMM9PARTA018492        | Gm16311          | 0.010534297 | 0.492585116 | down |
| ASMM9PARTA046151        | AY512931         | 0.000382    | 0.476806237 | down |
| ASMM9PARTA002462        |                  | 0.004421781 | 0.349586862 | down |
| ASMM9PARTA000029        |                  | 0.001741061 | 0.125177591 | down |
| MM9LINCRNAEXON11761-_P1 | mouselincRNA0237 | 0.0000212   | 0.302590035 | down |
| ASMM9PARTA047918        | AK014089         | 0.000016    | 0.299162316 | down |
| ASMM9PARTA007575        |                  | 0.007384884 | 0.486187179 | down |
| ASMM9PARTA007575        |                  | 0.007384884 | 0.486187179 | down |
| ASMM9PARTA044915        | 4930471G03Rik    | 0.00022     | 0.433259701 | down |
| ASMM9PARTA050475        | Atg16l2          | 0.003020605 | 0.283329277 | down |
| ASMM9PARTA006522        |                  | 0.003308344 | 0.476319082 | down |
| ASMM9PARTA045413        | 9530009M10Rik    | 0.004130147 | 0.347505318 | down |
| ASMM9PARTA047065        | AK006051         | 0.000000196 | 0.241939091 | down |
| CUST_301_P1426073487    | uc.303           | 0.001177246 | 0.419145669 | down |
| CK382063_P1             | humanlincRNA0287 | 0.003280742 | 0.44224689  | down |
| ASMM9PARTA007214        |                  | 0.00000192  | 0.372823772 | down |
| MM9LINCRNAEXON10630+_P1 | mouselincRNA1245 | 0.000102    | 0.300534916 | down |
| ASMM9PARTA009780        | Gm12569          | 0.001947491 | 0.392606836 | down |
| CO044174_P1             | mouselincRNA1066 | 0.000049    | 0.472173761 | down |
| ASMM9PARTA000444        |                  | 0.029128164 | 0.362629572 | down |
| ASMM9PARTA017595        | Gm11846          | 0.00000216  | 0.291409892 | down |
| ASMM9PARTA006315        |                  | 0.008131351 | 0.463956345 | down |
| ASMM9PARTA001580        |                  | 0.00519406  | 0.473822425 | down |
| ASMM9PARTA016844        | Gm15444          | 0.012283576 | 0.314743432 | down |
| ASMM9PARTA016844        | Gm15444          | 0.012283576 | 0.314743432 | down |
| ASMM9PARTA048638        | Zbtb9            | 0.019881556 | 0.427230511 | down |
| ASMM9PARTA048638        | Zbtb9            | 0.019881556 | 0.427230511 | down |
| ASMM9PARTA048638        | Zbtb9            | 0.019881556 | 0.427230511 | down |
| ASMM9PARTA016224        | 4930412C18Rik    | 0.000000376 | 0.10551603  | down |
| ASMM9PARTA003967        |                  | 0.0000447   | 0.498906696 | down |
| ASMM9PARTA011720        | Gm13627          | 0.000157    | 0.428877194 | down |
| ASMM9PARTA015647        | 1700125H03Rik    | 0.03708068  | 0.400345033 | down |
| BE949468_P1             | mouselincRNA1019 | 0.006572181 | 0.343576447 | down |
| ASMM9PARTA009841        | D130007C19Rik    | 0.0000867   | 0.435406869 | down |
| ASMM9PARTA003111        |                  | 0.000645    | 0.265245664 | down |
| ASMM9PARTA000385        |                  | 0.000192    | 0.357868589 | down |
| ASMM9PARTA009352        |                  | 0.001883952 | 0.135158404 | down |
| ASMM9PARTA007116        |                  | 0.00000436  | 0.387407595 | down |
| ASMM9PARTA017353        | Gm6117           | 0.007448608 | 0.461503245 | down |
| ASMM9PARTA047039        | AK166453         | 0.000000363 | 0.029903844 | down |
| ASMM9PARTA007128        |                  | 0.011875288 | 0.337378206 | down |
| ASMM9PARTA014317        | Gm14120          | 0.006682273 | 0.414347237 | down |
| MM9LINCRNAEXON10341+_P1 |                  | 0.000101    | 0.488959227 | down |

|                         |                  |             |             |      |
|-------------------------|------------------|-------------|-------------|------|
| ASMM9PARTA014298        | Gm14396          | 0.001661232 | 0.466454243 | down |
| ASMM9PARTA007777        |                  | 0.0000134   | 0.349362504 | down |
| MM9LINCRNAEXON10138-_P1 | mouselincRNA1567 | 0.00000805  | 0.286963067 | down |
| ASMM9PARTA004565        |                  | 0.0000104   | 0.031065693 | down |
| ASMM9PARTA051808        |                  | 0.000412    | 0.138451317 | down |
| ASMM9PARTA006624        |                  | 0.008812039 | 0.407491819 | down |
| ASMM9PARTA047889        | AK136126         | 0.00000144  | 0.071002299 | down |
| ASMM9PARTA005094        |                  | 0.001441168 | 0.492823747 | down |
| MM9LINCRNAEXON11717+_P1 | mouselincRNA0341 | 0.0000474   | 0.407132522 | down |
| ASMM9PARTA019274        | AC157896.1       | 0.0000219   | 0.441511591 | down |
| CD563094_P1             | mouselincRNA0148 | 0.001358144 | 0.172894398 | down |
| MM9LINCRNAEXON10349-_P1 |                  | 0.000332    | 0.420470859 | down |
| ASMM9PARTA005587        |                  | 0.015107151 | 0.432195262 | down |
| ASMM9PARTA047548        | AK016040         | 0.000246    | 0.421582494 | down |
| AI558076_P1             | mouselincRNA0528 | 0.017239751 | 0.425502926 | down |
| ASMM9PARTA016836        | Hoxb3os          | 0.001191853 | 0.440898776 | down |
| ASMM9PARTA016836        | Hoxb3os          | 0.001191853 | 0.440898776 | down |
| ASMM9PARTA016836        | Hoxb3os          | 0.001191853 | 0.440898776 | down |
| ASMM9PARTA014069        | A730017L22Rik    | 0.000129    | 0.159517135 | down |
| ASMM9PARTA004045        |                  | 0.000324    | 0.467248737 | down |
| ASMM9PARTA017530        | Gm16129          | 0.002298507 | 0.383433995 | down |
| ASMM9PARTA017530        | Gm16129          | 0.002298507 | 0.383433995 | down |
| ASMM9PARTA017530        | Gm16129          | 0.002298507 | 0.383433995 | down |
| ASMM9PARTA048192        | AK080258         | 0.008977083 | 0.465652104 | down |
| ASMM9PARTA049060        | mKIAA0137        | 0.017651971 | 0.42077832  | down |
| ASMM9PARTA005909        |                  | 0.016901856 | 0.469447401 | down |
| ASMM9PARTA017182        | Gm14820          | 0.019883476 | 0.279931869 | down |
