# Supplementary material for: Microarray Profile of Long Noncoding RNA and Messenger RNA Expression in a Model of Alzheimer’s Disease
Source: MDPI journal article supplement (doi:10.3390/life10050064), 2020-05-14
Supplement: s1 [file s1]

# Supplementary

## Microarray Profile of Long Noncoding RNA and Messenger RNA Expression in a Model of Alzheimer's Disease

Linlin Wang <sup>†</sup>, Li Zeng <sup>†</sup>, Hailun Jiang, Zhuorong Li <sup>\*</sup> and Rui Liu <sup>\*</sup>

Institute of Medicinal Biotechnology, Chinese Academy of Medical Sciences and Peking Union Medical College, Beijing 100050, China; wanglinlin@wfmc.edu.cn (L.W.); zengsheng@imb.pumc.edu.cn (L.Z.); jianghailun@imb.pumc.edu.cn (H.J.)

<sup>\*</sup> Correspondence: lizhourong@imb.pumc.edu.cn (Z.L.); +86-10-8352017; .liurui@imb.pumc.edu.cn (R.L.); Tel.: +86-10-67087731

**Table S8.** Differently expressed mRNAs in the brain of 9-month-old APP/PS1 mice compared with age-matched WT mice.

| Probe Name       | Symbol        | <i>p</i> -Value | Fold Change | Regulation |
|------------------|---------------|-----------------|-------------|------------|
| ASMM9PARTA038194 | Cml2          | 0.045779776     | 3.6246243   | up         |
| ASMM9PARTA027886 | Gsta1         | 0.00000359      | 53.68711    | up         |
| ASMM9PARTA045052 | Olfir220      | 0.012035505     | 2.4770977   | up         |
| ASMM9PARTA027293 | Spp1          | 0.000272        | 4.6906066   | up         |
| ASMM9PARTA025747 | Tshb          | 0.00000154      | 15.374761   | up         |
| ASMM9PARTA033934 | Asb4          | 0.011208599     | 2.3513675   | up         |
| ASMM9PARTA037561 | Dbr1          | 0.0000156       | 2.284718    | up         |
| ASMM9PARTA031760 | Cpt1a         | 0.02994442      | 2.0144393   | up         |
| ASMM9PARTA028605 | Lgals1        | 0.000781        | 2.9727602   | up         |
| ASMM9PARTA032887 | Mos           | 0.031983916     | 2.0967693   | up         |
| ASMM9PARTA032449 | Rbms2         | 0.000788        | 2.1443632   | up         |
| ASMM9PARTA044292 | Zhx2          | 0.004828548     | 3.0402644   | up         |
| ASMM9PARTA038784 | Cyp2a12       | 0.003379141     | 2.8495603   | up         |
| ASMM9PARTA044232 | Clqtntf9      | 0.003571573     | 2.2076929   | up         |
| ASMM9PARTA037203 | Arhgap24      | 0.003013721     | 2.4376557   | up         |
| ASMM9PARTA031750 | Slc27a1       | 0.00000665      | 4.0185995   | up         |
| ASMM9PARTA038638 | Pygl          | 0.00000535      | 3.7015345   | up         |
| ASMM9PARTA032573 | Rdh7          | 0.014953258     | 3.7964184   | up         |
| ASMM9PARTA025350 | Tpm1          | 0.000949        | 2.423386    | up         |
| ASMM9PARTA025501 | Tpm1          | 0.01789245      | 2.1569705   | up         |
| ASMM9PARTA028756 | Pax1          | 0.011056793     | 2.3572633   | up         |
| ASMM9PARTA027822 | Gch1          | 0.0000671       | 2.8479276   | up         |
| ASMM9PARTA026869 | Dnmt1         | 0.002123956     | 3.2389054   | up         |
| ASMM9PARTA044461 | Rsl24d1       | 0.00000228      | 4.489637    | up         |
| ASMM9PARTA036319 | 1700001F09Rik | 0.000445        | 2.8995903   | up         |
| ASMM9PARTA035878 | Mapk6         | 0.029392151     | 4.8868704   | up         |
| ASMM9PARTA022999 | Kng1          | 0.000029        | 6.634968    | up         |
| ASMM9PARTA028991 | Slc4a3        | 0.005388057     | 2.2340128   | up         |

|                  |               |             |           |    |
|------------------|---------------|-------------|-----------|----|
| ASMM9PARTA031296 | Azgp1         | 0.0000758   | 53.193203 | up |
| ASMM9PARTA028762 | Pipox         | 0.008351406 | 2.0164452 | up |
| ASMM9PARTA028034 | Cfb           | 0.0000159   | 22.322893 | up |
| ASMM9PARTA032662 | Ncoa4         | 0.00755903  | 2.5767996 | up |
| ASMM9PARTA025888 | Abca6         | 0.0000352   | 3.1062806 | up |
| ASMM9PARTA025718 | Cdr1          | 0.0000644   | 2.13334   | up |
| ASMM9PARTA042349 | Qrich1        | 0.026870431 | 4.2185373 | up |
| ASMM9PARTA043488 | Slfn8         | 0.003016642 | 4.9476    | up |
| ASMM9PARTA023561 | Epb4.115      | 0.001206713 | 2.00441   | up |
| ASMM9PARTA044235 | Slc23a3       | 0.0000338   | 3.5199783 | up |
| ASMM9PARTA028804 | Saa1          | 6.62E-08    | 33.61684  | up |
| ASMM9PARTA037501 | Mrap          | 0.002060056 | 5.355639  | up |
| ASMM9PARTA038270 | GpnmB         | 0.029276676 | 2.5159812 | up |
| ASMM9PARTA034297 | Baiap211      | 0.014289469 | 2.5955942 | up |
| ASMM9PARTA033992 | Tnfrsf22      | 0.001479952 | 2.4460945 | up |
| ASMM9PARTA020618 | Nxf3          | 0.026787411 | 2.1621056 | up |
| ASMM9PARTA021063 | Trpm3         | 0.000681    | 2.2152126 | up |
| ASMM9PARTA028895 | Trh           | 0.00000126  | 3.0509381 | up |
| ASMM9PARTA036284 | Anks4b        | 0.014252404 | 2.8966143 | up |
| ASMM9PARTA027698 | Gc            | 0.00000403  | 109.52732 | up |
| ASMM9PARTA033615 | Bhmt2         | 0.005609026 | 4.055277  | up |
| ASMM9PARTA024997 | Nr1h4         | 0.029813219 | 2.263736  | up |
| ASMM9PARTA023618 | Krtap11-1     | 0.002912072 | 2.4261823 | up |
| ASMM9PARTA043364 | Reep3         | 0.00039     | 2.1506965 | up |
| ASMM9PARTA021502 | Raph1         | 0.004872218 | 6.241117  | up |
| ASMM9PARTA033443 | B4galt1       | 0.01023507  | 2.0386043 | up |
| ASMM9PARTA033640 | Stk32b        | 0.036292892 | 2.0242531 | up |
| ASMM9PARTA028934 | Tac2          | 0.00000103  | 2.00584   | up |
| ASMM9PARTA041340 | Phc3          | 0.032855276 | 2.1730123 | up |
| ASMM9PARTA043987 | 1100001G20Rik | 0.000982    | 5.176354  | up |
| ASMM9PARTA026193 | Tmem11        | 0.006078165 | 2.4421546 | up |
| ASMM9PARTA035974 | Dzip3         | 0.000312    | 2.655217  | up |
| ASMM9PARTA032094 | Tmprss2       | 0.005929107 | 8.4456625 | up |
| ASMM9PARTA029814 | F7            | 0.019000951 | 2.0754564 | up |
| ASMM9PARTA043891 | Nxph4         | 0.0000255   | 6.4234366 | up |
| ASMM9PARTA022309 | Tsc22d2       | 0.018254824 | 3.8422744 | up |
| ASMM9PARTA021564 | Shroom4       | 0.001518185 | 2.189238  | up |
| ASMM9PARTA028059 | Gstm6         | 0.00000522  | 3.972863  | up |
| ASMM9PARTA027522 | Fst           | 0.001207298 | 3.5836024 | up |
| ASMM9PARTA021642 | Hsf5          | 0.002550301 | 2.1091907 | up |
| ASMM9PARTA022725 | Kng2          | 0.0000492   | 4.140855  | up |
| ASMM9PARTA028723 | Pou3f2        | 0.000556    | 2.2296135 | up |
| ASMM9PARTA029984 | Flt3          | 0.000338    | 2.029359  | up |
| ASMM9PARTA031617 | Adrb3         | 0.0000642   | 2.5341303 | up |
| ASMM9PARTA027085 | H2-Q9         | 0.0000617   | 2.3414183 | up |
| ASMM9PARTA021097 | Trpm3         | 0.002624987 | 3.5190523 | up |
| ASMM9PARTA039476 | Tm4sf4        | 0.000168    | 687.16095 | up |
| ASMM9PARTA039253 | Aldob         | 0.036676973 | 4.116622  | up |
| ASMM9PARTA038680 | Errfi1        | 0.044672493 | 3.0001395 | up |
| ASMM9PARTA025695 | R3hdm2        | 0.019590486 | 2.4934993 | up |
| ASMM9PARTA034324 | Metap1d       | 0.0000396   | 3.1245039 | up |
| ASMM9PARTA031792 | Ar            | 0.043859076 | 2.5082378 | up |
| ASMM9PARTA022331 | 1110020G09Rik | 0.0000636   | 2.6740084 | up |
| ASMM9PARTA039655 | Cald1         | 0.001165898 | 3.7672837 | up |
| ASMM9PARTA019635 | Whamm         | 0.0000117   | 3.1854694 | up |
| ASMM9PARTA032279 | Timm23        | 0.002484317 | 2.1506739 | up |
| ASMM9PARTA022946 | Mpzl3         | 0.005419126 | 2.5725136 | up |

|                  |               |             |            |    |
|------------------|---------------|-------------|------------|----|
| ASMM9PARTA035507 | Otop3         | 0.002396526 | 2.7736433  | up |
| ASMM9PARTA031008 | Procr         | 0.007059929 | 8.744379   | up |
| ASMM9PARTA041619 | F11r          | 0.0000247   | 2.3263345  | up |
| ASMM9PARTA024171 | Homer3        | 0.0000305   | 2.0901227  | up |
| ASMM9PARTA041488 | Ugt2b34       | 0.010387068 | 2.4133658  | up |
| ASMM9PARTA034391 | 1700011A15Rik | 0.00779953  | 3.1635954  | up |
| ASMM9PARTA031689 | Gfpt1         | 0.010807246 | 3.7557623  | up |
| ASMM9PARTA031518 | Spnb1         | 0.002384956 | 2.6896532  | up |
| ASMM9PARTA030892 | Vill          | 0.002116629 | 2.0621455  | up |
| ASMM9PARTA025868 | Arhgap39      | 0.000172    | 2.7099278  | up |
| ASMM9PARTA042206 | Stk36         | 0.000547    | 3.4348116  | up |
| ASMM9PARTA041997 | Slc31a1       | 0.002809444 | 2.05081    | up |
| ASMM9PARTA030907 | Rgs16         | 0.003411418 | 2.0144656  | up |
| ASMM9PARTA036949 | Lonrf3        | 0.003271336 | 2.037203   | up |
| ASMM9PARTA032904 | Ikbke         | 0.0311579   | 3.4544601  | up |
| ASMM9PARTA029790 | Atf2          | 0.001007943 | 2.209244   | up |
| ASMM9PARTA036225 | Fam75d3       | 0.0330409   | 2.1716456  | up |
| ASMM9PARTA037234 | Pcdh1         | 0.026136031 | 2.3191028  | up |
| ASMM9PARTA028708 | Snap23        | 0.000199    | 2.0343738  | up |
| ASMM9PARTA025656 | Dcaf17        | 0.0000296   | 2.4647758  | up |
| ASMM9PARTA037112 | Rpl18a        | 0.0000166   | 3.3978186  | up |
| ASMM9PARTA028727 | Psen1         | 0.000303    | 2.2164915  | up |
| ASMM9PARTA027887 | Hadh          | 0.000165    | 2.0298033  | up |
| ASMM9PARTA027419 | Agt           | 0.0000601   | 2.1952047  | up |
| ASMM9PARTA037652 | Nfkbiz        | 0.010048649 | 2.466104   | up |
| ASMM9PARTA029936 | Cyp2d9        | 0.031257126 | 2.7189524  | up |
| ASMM9PARTA027054 | Spp1          | 0.000561    | 3.3399868  | up |
| ASMM9PARTA022841 | Tmem235       | 0.0000452   | 2.6219156  | up |
| ASMM9PARTA020417 | Gm5591        | 0.00000399  | 4.1472974  | up |
| ASMM9PARTA027759 | Cyp3a16       | 0.016960327 | 3.7645054  | up |
| ASMM9PARTA023878 | Usp51         | 0.0006      | 2.1780007  | up |
| ASMM9PARTA027122 | Afp           | 0.038003333 | 15.9037895 | up |
| ASMM9PARTA030638 | Apcs          | 0.008810872 | 12.0482855 | up |
| ASMM9PARTA023026 | Kng2          | 0.001326915 | 2.5115268  | up |
| ASMM9PARTA030003 | Hfe           | 0.006667319 | 2.0103436  | up |
| ASMM9PARTA023882 | Cfb           | 0.00033     | 9.183315   | up |
| ASMM9PARTA032069 | Gpc3          | 0.000624    | 5.140846   | up |
| ASMM9PARTA037250 | 1600029D21Rik | 0.002240232 | 22.936808  | up |
| ASMM9PARTA027411 | Csn3          | 0.00000257  | 7.2258677  | up |
| ASMM9PARTA036396 | F11           | 0.025590647 | 2.6305017  | up |
| ASMM9PARTA027534 | Slc7a2        | 0.005787695 | 8.339105   | up |
| ASMM9PARTA034257 | Chmp4c        | 0.00062     | 16.92601   | up |
| ASMM9PARTA022005 | Flnc          | 0.011085186 | 2.4486353  | up |
| ASMM9PARTA024486 | Nkx2-1        | 0.0000198   | 2.621146   | up |
| ASMM9PARTA034100 | Pcbd1         | 0.002003013 | 2.088299   | up |
| ASMM9PARTA029514 | Cd8b1         | 0.000255    | 2.1830075  | up |
| ASMM9PARTA029838 | Cyp2d10       | 0.000208    | 19.47933   | up |
| ASMM9PARTA039606 | Fcrla         | 0.04281942  | 2.247378   | up |
| ASMM9PARTA024433 | Ccdc48        | 0.000237    | 2.2192373  | up |
| ASMM9PARTA040876 | Olfr550       | 0.001201631 | 2.763322   | up |
| ASMM9PARTA033437 | Il21          | 0.029619403 | 2.6832252  | up |
| ASMM9PARTA034429 | Cyb5b         | 0.000114    | 2.2067766  | up |
| ASMM9PARTA028611 | Cxcl9         | 0.014023554 | 3.9382093  | up |
| ASMM9PARTA033390 | Rqcd1         | 0.005982852 | 4.5682845  | up |
| ASMM9PARTA033704 | Sync          | 0.003430105 | 3.6855893  | up |
| ASMM9PARTA039024 | Atp12a        | 0.047899127 | 2.889323   | up |
| ASMM9PARTA031529 | Zfp59         | 0.037735634 | 2.4037533  | up |

|                      |               |             |           |    |
|----------------------|---------------|-------------|-----------|----|
| ASMM9PARTA035126     | Srek1ip1      | 0.000342    | 2.6132863 | up |
| ASMM9PARTA037334     | Mccc2         | 0.0000311   | 5.0420737 | up |
| ASMM9PARTA029737     | Dlx5          | 0.0000601   | 2.6381536 | up |
| ASMM9PARTA028744     | Serpina1c     | 0.0000543   | 7.8481054 | up |
| ASMM9PARTA030734     | Ccl12         | 0.00000878  | 2.3583927 | up |
| ASMM9PARTA037934     | Cpn1          | 0.000176    | 6.4089227 | up |
| ASMM9PARTA027191     | Plin2         | 0.000143    | 4.8682632 | up |
| ASMM9PARTA030825     | Orm2          | 0.0000256   | 23.21154  | up |
| ASMM9PARTA031288     | Map3k1        | 0.033357356 | 3.0881505 | up |
| ASMM9PARTA032256     | Chst2         | 7.06E-08    | 4.2964516 | up |
| ASMM9PARTA040891     | Rnf183        | 0.032298982 | 2.6582546 | up |
| ASMM9PARTA042023     | Pon3          | 0.000197    | 3.0224338 | up |
| ASMM9PARTA029891     | H2-D1         | 0.000545    | 3.2681434 | up |
| ASMM9PARTA032787     | Fbp1          | 0.03642512  | 5.903397  | up |
| ASMM9PARTA031329     | Nt5e          | 0.028728137 | 2.2291462 | up |
| ASMM9PARTA027587     | Efnb3         | 0.000045    | 2.0903556 | up |
| ASMM9PARTA037256     | Spcs3         | 0.001843464 | 2.2931519 | up |
| ASMM9PARTA021622     | Hdhd2         | 0.000244    | 2.0585213 | up |
| ASMM9PARTA024887     | Ccdc90b       | 0.0000674   | 18.06837  | up |
| ASMM9PARTA021373     | Akap2         | 0.000276    | 2.1533675 | up |
| ASMM9PARTA037997     | Steap4        | 0.047949597 | 2.9620726 | up |
| ASMM9PARTA043478     | Mapkapk3      | 0.008205338 | 2.4605498 | up |
| ASMM9PARTA044234     | Fam25c        | 0.000649    | 13.791984 | up |
| ASMM9PARTA021491     | Edem3         | 0.040823113 | 2.038919  | up |
| ASMM9PARTA041614     | Itpk1         | 0.0000997   | 2.5102594 | up |
| ASMM9PARTA040339     | Olfr196       | 0.0369579   | 2.487124  | up |
| ASMM9PARTA023587     | Schip1        | 0.00197141  | 3.480949  | up |
| ASMM9PARTA024383     | Fam5c         | 0.04707206  | 3.1735277 | up |
| ASMM9PARTA025288     | Rtdr1         | 0.001840493 | 2.9028354 | up |
| ASMM9PARTA020524     | Ate1          | 0.006402261 | 2.2398763 | up |
| ASMM9PARTA027255     | Ambp          | 0.0000111   | 17.787172 | up |
| ASMM9PARTA025569     | 5-Mar         | 0.000245    | 3.5646636 | up |
| ASMM9PARTA027581     | Cp            | 0.0000168   | 3.564718  | up |
| ASMM9PARTA027428     | Anxa2         | 0.001247452 | 5.3888893 | up |
| ASMM9PARTA043134     | Serpina7      | 0.004401589 | 13.657775 | up |
| ASMM9PARTA035767     | Zfp715        | 0.004082636 | 2.024345  | up |
| ASMM9PARTA043312     | Apol10b       | 0.015021765 | 3.599081  | up |
| ASMM9PARTA043420     | Hbp1          | 8.71E-08    | 2.706979  | up |
| ASMM9PARTA022182     | Mup6          | 0.00000886  | 26.435205 | up |
| ASMM9PARTA026350     | Rreb1         | 0.000111    | 2.0152    | up |
| ASMM9PARTA037995     | Clec2h        | 0.003319784 | 2.6663601 | up |
| ASMM9PARTA029223     | Apoa1         | 0.00000898  | 24.06658  | up |
| ASMM9PARTA044144     | Pou2f1        | 0.004604596 | 2.1384192 | up |
| ASMM9PARTA042763     | Ankar         | 0.0000578   | 2.013105  | up |
| ASMM9PARTA028178     | Cd180         | 0.000215    | 6.608197  | up |
| ASMM9PARTA040966     | Cxcl17        | 0.006841142 | 3.6941843 | up |
| ASMM9PARTA043668     | Ecd4          | 0.00000815  | 2.2583656 | up |
| ASMM9PARTA041135     | Pilra         | 0.001711208 | 2.1585486 | up |
| ASMM9PARTA044321     | Gm5148        | 0.000824    | 2.5767224 | up |
| ASMM9PARTA032223     | Hpx           | 0.00000117  | 53.584538 | up |
| ASMM9PARTA024911     | Mup1          | 0.0000029   | 3.0849967 | up |
| ASMM9PARTA032294     | Gnpnat1       | 0.002818301 | 2.1584404 | up |
| ASMM9PARTA021695     | Glyctk        | 0.031817373 | 2.1775353 | up |
| ASMM9PARTA037407     | 2310079F23Rik | 0.001868273 | 2.1136265 | up |
| CUST 268 PI426409190 | Gm13304       | 5.44E-08    | 24.152235 | up |
| ASMM9PARTA032749     | Apom          | 0.000485    | 12.258493 | up |
| ASMM9PARTA042579     | Tmem169       | 0.002541478 | 2.9339955 | up |

|                      |               |             |           |    |
|----------------------|---------------|-------------|-----------|----|
| ASMM9PARTA027544     | Cd36          | 0.000634    | 2.5803492 | up |
| ASMM9PARTA025984     | Hmga1         | 0.001654858 | 2.4464333 | up |
| ASMM9PARTA043176     | Klhl23        | 0.002474109 | 2.0706751 | up |
| ASMM9PARTA039314     | Serpina10     | 0.003007356 | 5.7853756 | up |
| ASMM9PARTA028891     | Hnfla         | 0.000671    | 9.203837  | up |
| ASMM9PARTA041532     | Snx8          | 0.0000686   | 2.0165017 | up |
| ASMM9PARTA028099     | Lrig1         | 0.018317364 | 2.1021    | up |
| ASMM9PARTA026253     | Gm7120        | 0.000000739 | 7.5769663 | up |
| ASMM9PARTA027785     | Cxcl1         | 0.015482241 | 8.986367  | up |
| ASMM9PARTA026661     | Gm14326       | 0.015607159 | 2.0226023 | up |
| ASMM9PARTA037052     | Mau2          | 0.0000168   | 2.4766018 | up |
| ASMM9PARTA021180     | Ceacam1       | 0.008224509 | 3.290531  | up |
| ASMM9PARTA027498     | Cd63          | 0.000128    | 2.9222653 | up |
| ASMM9PARTA035554     | C8g           | 0.003914604 | 2.1211708 | up |
| ASMM9PARTA038624     | Rpp25         | 0.000175    | 2.132115  | up |
| ASMM9PARTA041452     | Slain2        | 0.000889    | 2.1441817 | up |
| ASMM9PARTA035965     | Caskin1       | 0.025584867 | 2.8046715 | up |
| ASMM9PARTA025907     | Phc3          | 0.03603932  | 3.0776289 | up |
| ASMM9PARTA028313     | Igfals        | 0.002827816 | 10.235139 | up |
| ASMM9PARTA021630     | Syt12         | 0.00118439  | 2.2405682 | up |
| ASMM9PARTA024037     | Gm765         | 0.0000164   | 2.1508787 | up |
| ASMM9PARTA029833     | Ctsl          | 0.0000281   | 3.1652515 | up |
| ASMM9PARTA042512     | 9230105E10Rik | 0.00000471  | 4.2053246 | up |
| ASMM9PARTA023458     | Igf1          | 0.00091     | 3.517021  | up |
| ASMM9PARTA022678     | Prnt4         | 0.017552514 | 2.3765056 | up |
| ASMM9PARTA019633     | Dnmt3b        | 0.036239456 | 2.844782  | up |
| ASMM9PARTA030386     | Igf1          | 0.00014     | 5.502942  | up |
| ASMM9PARTA022707     | Krtap9-5      | 0.003763374 | 3.8013742 | up |
| ASMM9PARTA030244     | Gsr           | 0.000236    | 3.698937  | up |
| ASMM9PARTA030760     | Prl           | 0.0000171   | 2.1874514 | up |
| ASMM9PARTA022155     | Tmpo          | 0.001669535 | 2.4939332 | up |
| ASMM9PARTA036875     | Abcb8         | 0.039731324 | 2.4103553 | up |
| ASMM9PARTA021527     | Peg10         | 0.0000274   | 2.0524564 | up |
| ASMM9PARTA024659     | Irf9          | 0.00309557  | 2.384155  | up |
| ASMM9PARTA043415     | Prpf39        | 0.00000306  | 4.11868   | up |
| ASMM9PARTA025500     | Rnf41         | 0.002577583 | 2.1178644 | up |
| ASMM9PARTA020382     | Pcnp          | 0.000307    | 2.0917192 | up |
| ASMM9PARTA040116     | Olfr694       | 0.044646926 | 2.5641098 | up |
| ASMM9PARTA034887     | Dnajc19       | 0.0000341   | 2.0957391 | up |
| ASMM9PARTA032070     | S100a11       | 0.000862    | 2.1032557 | up |
| ASMM9PARTA024537     | Cd36          | 0.000211    | 3.6749263 | up |
| ASMM9PARTA020156     | Pde1a         | 0.0000632   | 2.2359629 | up |
| ASMM9PARTA021444     | Stk35         | 0.000122    | 2.4849546 | up |
| ASMM9PARTA041600     | Vps41         | 0.000227    | 2.1319923 | up |
| ASMM9PARTA025980     | Hnrnpf        | 0.04025108  | 2.8693454 | up |
| CUST 241 PI426409190 | Ssty2         | 0.000249    | 3.71356   | up |
| ASMM9PARTA042538     | Grik4         | 0.012636185 | 2.6928651 | up |
| ASMM9PARTA031447     | Psmb9         | 0.0000563   | 2.0374448 | up |
| ASMM9PARTA020624     | Gal3st3       | 0.000508    | 5.6365447 | up |
| ASMM9PARTA043082     | Cdkl2         | 0.0000666   | 3.13522   | up |
| ASMM9PARTA036776     | Tmc1          | 0.005640278 | 3.0431974 | up |
| ASMM9PARTA025115     | Ctxn2         | 0.000497    | 2.003892  | up |
| ASMM9PARTA021401     | Scol          | 0.00970117  | 2.8475747 | up |
| ASMM9PARTA028854     | Serpina1b     | 0.0000607   | 12.649457 | up |
| ASMM9PARTA026748     | Igsf5         | 0.001061872 | 9.769573  | up |
| ASMM9PARTA021463     | Krt40         | 0.006774337 | 2.318333  | up |
| ASMM9PARTA038940     | Rbm28         | 0.00000617  | 2.4362783 | up |

|                      |               |             |           |    |
|----------------------|---------------|-------------|-----------|----|
| ASMM9PARTA038580     | Dst           | 0.029456314 | 2.5313416 | up |
| ASMM9PARTA021014     | Zfc3h1        | 0.012504224 | 2.00228   | up |
| ASMM9PARTA030642     | Marco         | 0.000066    | 16.976564 | up |
| ASMM9PARTA028615     | Mup5          | 0.0000247   | 6.272828  | up |
| ASMM9PARTA021230     | Gm98          | 0.007039565 | 2.4478495 | up |
| ASMM9PARTA026155     | Tcirg1        | 0.0000475   | 2.1868963 | up |
| ASMM9PARTA041970     | Slc25a24      | 0.0000115   | 2.83283   | up |
| ASMM9PARTA023544     | Rbfox2        | 0.005439616 | 3.4373653 | up |
| ASMM9PARTA043938     | Tanc2         | 0.012043234 | 2.2852807 | up |
| ASMM9PARTA021070     | Lipt1         | 0.012651081 | 2.350895  | up |
| ASMM9PARTA024527     | Cep97         | 0.027278522 | 2.0036643 | up |
| ASMM9PARTA034143     | Fam134b       | 0.029609755 | 2.9723966 | up |
| ASMM9PARTA041954     | Rln3          | 0.003609926 | 2.5326767 | up |
| ASMM9PARTA033694     | Nup98         | 0.011752876 | 2.6012425 | up |
| ASMM9PARTA022049     | Prdm13        | 0.00000334  | 4.24886   | up |
| ASMM9PARTA028599     | Raet1c        | 0.000166    | 5.084378  | up |
| ASMM9PARTA031227     | Slc7a11       | 0.000507    | 2.1157584 | up |
| ASMM9PARTA033087     | Cpb2          | 0.0000626   | 278.82602 | up |
| ASMM9PARTA037145     | Gsc2          | 0.03481157  | 2.2349374 | up |
| ASMM9PARTA036517     | Vgll3         | 0.001370002 | 2.1974564 | up |
| ASMM9PARTA031919     | Atp2a3        | 0.002671693 | 2.3173857 | up |
| ASMM9PARTA029618     | Cd2ap         | 0.005638016 | 2.4518116 | up |
| ASMM9PARTA044388     | Hjurp         | 0.0000229   | 2.2545362 | up |
| ASMM9PARTA027386     | Pzp           | 0.001538771 | 8.373349  | up |
| ASMM9PARTA031110     | Ywhaz         | 0.000000437 | 3.3895173 | up |
| CUST 305 PI426409190 | Ccl28         | 0.000000213 | 8.759215  | up |
| ASMM9PARTA043745     | Ccdc83        | 0.035488527 | 2.639819  | up |
| ASMM9PARTA040825     | Olfr109       | 0.022216693 | 4.8845677 | up |
| ASMM9PARTA036313     | Cpne3         | 0.000366    | 2.4124289 | up |
| ASMM9PARTA027898     | Klra5         | 0.000232    | 2.7668018 | up |
| ASMM9PARTA041859     | Larp4b        | 0.009818823 | 2.1518023 | up |
| ASMM9PARTA030185     | Ly6d          | 0.007449973 | 7.8545566 | up |
| ASMM9PARTA037143     | Klhl24        | 0.027897537 | 2.24306   | up |
| ASMM9PARTA030432     | Lmx1b         | 0.01476521  | 2.1249783 | up |
| ASMM9PARTA038161     | Rbfox2        | 0.03709465  | 2.0636907 | up |
| ASMM9PARTA038245     | Lpo           | 0.002868947 | 2.379003  | up |
| ASMM9PARTA025140     | Rrp1b         | 0.009842187 | 2.2809372 | up |
| ASMM9PARTA033455     | Pard6b        | 0.008547243 | 2.0140612 | up |
| ASMM9PARTA037729     | Apobec1       | 0.003064843 | 5.4989486 | up |
| ASMM9PARTA023816     | H2-Gs10       | 0.0000301   | 2.0221434 | up |
| ASMM9PARTA031745     | Fbxo6         | 0.010012584 | 2.7544951 | up |
| ASMM9PARTA028203     | Hpgd          | 0.002606208 | 2.032682  | up |
| ASMM9PARTA025253     | 1700016H13Rik | 0.002268186 | 2.1239724 | up |
| ASMM9PARTA029884     | Gata6         | 0.002283217 | 12.734244 | up |
| ASMM9PARTA037840     | Akap12        | 0.00000519  | 5.0415626 | up |
| CUST 243 PI426409190 | B020031M17Rik | 0.0000136   | 3.8238912 | up |
| ASMM9PARTA042096     | H6pd          | 0.00093     | 5.7167263 | up |
| ASMM9PARTA033540     | Wbp11         | 0.0000415   | 2.2315981 | up |
| ASMM9PARTA038889     | Rbm47         | 0.02987905  | 2.7269614 | up |
| ASMM9PARTA029961     | Itih2         | 0.002951558 | 5.789016  | up |
| ASMM9PARTA042120     | Frmd3         | 0.000175    | 2.8166726 | up |
| ASMM9PARTA030794     | Ccl21a        | 7.38E-08    | 21.355742 | up |
| ASMM9PARTA031691     | Gzmb          | 0.031188648 | 2.174022  | up |
| ASMM9PARTA036488     | Crc1          | 0.001768091 | 16.470968 | up |
| ASMM9PARTA036961     | 1700001C19Rik | 0.000661    | 2.587373  | up |
| ASMM9PARTA038935     | Ehd4          | 0.003135653 | 3.1974306 | up |
| ASMM9PARTA035168     | Agpat2        | 0.0000843   | 2.6123466 | up |

|                  |               |             |           |    |
|------------------|---------------|-------------|-----------|----|
| ASMM9PARTA037836 | F13b          | 0.0000455   | 3.2635543 | up |
| ASMM9PARTA029721 | Bst1          | 0.013171109 | 2.570811  | up |
| ASMM9PARTA021982 | Gpr155        | 0.005910656 | 3.7375243 | up |
| ASMM9PARTA029029 | Serpina1e     | 0.0000239   | 2.6646607 | up |
| ASMM9PARTA027340 | Cfi           | 0.000276    | 2.6662219 | up |
| ASMM9PARTA029478 | Runx2         | 0.005437158 | 2.1712294 | up |
| ASMM9PARTA031132 | Cd70          | 0.005175323 | 2.153527  | up |
| ASMM9PARTA020973 | Skil          | 0.03163705  | 2.6564832 | up |
| ASMM9PARTA041397 | Cdkn2aip      | 0.000844    | 2.015926  | up |
| ASMM9PARTA028102 | Kcnc3         | 0.001163963 | 2.1579874 | up |
| ASMM9PARTA028356 | Impact        | 0.000939    | 2.204607  | up |
| ASMM9PARTA033903 | Cblc          | 0.000282    | 12.427941 | up |
| ASMM9PARTA040851 | Nmur2         | 0.0000694   | 2.631134  | up |
| ASMM9PARTA029246 | Spr1a         | 0.00000525  | 7.3599496 | up |
| ASMM9PARTA038930 | Vmn1r231      | 0.001137159 | 2.4766347 | up |
| ASMM9PARTA038354 | Pawr          | 0.0000561   | 3.0350862 | up |
| ASMM9PARTA023176 | Cacna2d1      | 0.002817812 | 2.2370334 | up |
| ASMM9PARTA024808 | Ttc15         | 5.77E-10    | 160.13786 | up |
| ASMM9PARTA022896 | Kng1          | 0.0000304   | 17.701557 | up |
| ASMM9PARTA023802 | LOC100048885  | 0.0000176   | 11.626115 | up |
| ASMM9PARTA036499 | Ugt2a3        | 0.002001194 | 5.840185  | up |
| ASMM9PARTA025859 | Frem3         | 0.000902    | 4.157524  | up |
| ASMM9PARTA025234 | Psg18         | 0.000667    | 2.426835  | up |
| ASMM9PARTA039500 | Hnrnpul1      | 0.019008452 | 3.767613  | up |
| ASMM9PARTA029472 | Alb           | 0.00000482  | 16.24476  | up |
| ASMM9PARTA025786 | Vmn1r39       | 0.009413214 | 2.614772  | up |
| ASMM9PARTA021040 | Trpm3         | 0.000545    | 34.841045 | up |
| ASMM9PARTA029136 | Svs5          | 0.000735    | 2.8063147 | up |
| ASMM9PARTA042786 | Mrgprb2       | 0.000723    | 4.66047   | up |
| ASMM9PARTA039742 | Hmx2          | 0.002073214 | 3.567825  | up |
| ASMM9PARTA030647 | 2-Sep         | 0.02096455  | 2.5368752 | up |
| ASMM9PARTA038515 | Cyp4v3        | 0.02671918  | 2.1643274 | up |
| ASMM9PARTA035481 | Tlcd2         | 0.003430681 | 2.745155  | up |
| ASMM9PARTA044237 | Tspan15       | 0.0000273   | 3.978303  | up |
| ASMM9PARTA027983 | Akr1b8        | 0.000587    | 2.9254284 | up |
| ASMM9PARTA039743 | Soat2         | 0.003598295 | 2.1649642 | up |
| ASMM9PARTA037352 | Bicd2         | 0.004271484 | 2.3764355 | up |
| ASMM9PARTA038017 | Aff4          | 0.036303855 | 2.5694952 | up |
| ASMM9PARTA032278 | Ybx2          | 0.006259136 | 2.138803  | up |
| ASMM9PARTA031043 | Wdr1          | 0.000161    | 3.7481172 | up |
| ASMM9PARTA027656 | Cryga         | 0.000254    | 2.5153656 | up |
| ASMM9PARTA043624 | Siglech       | 0.00000739  | 2.0416312 | up |
| ASMM9PARTA034441 | 4933411K16Rik | 0.007996665 | 2.0351696 | up |
| ASMM9PARTA034262 | Srsf9         | 0.000311    | 2.7478414 | up |
| ASMM9PARTA030830 | Pcsk6         | 0.008051564 | 2.927615  | up |
| ASMM9PARTA027908 | Ctla2b        | 0.006914449 | 2.3779097 | up |
| ASMM9PARTA027033 | Kcnmb3        | 0.013990067 | 2.9422908 | up |
| ASMM9PARTA044550 | Rasgrp3       | 0.027272016 | 2.5414963 | up |
| ASMM9PARTA025542 | Nsun6         | 0.00000941  | 3.2402625 | up |
| ASMM9PARTA031087 | Serpinf1      | 0.0000176   | 3.9197984 | up |
| ASMM9PARTA042748 | Zfp367        | 0.000221    | 2.131845  | up |
| ASMM9PARTA026912 | Bmp8b         | 0.000354    | 5.935956  | up |
| ASMM9PARTA028483 | Pomc          | 0.000488    | 2.472528  | up |
| ASMM9PARTA029559 | Cldn4         | 0.00615511  | 16.009712 | up |
| ASMM9PARTA033412 | Lrp10         | 0.0000893   | 2.3119104 | up |
| ASMM9PARTA029114 | Phlda2        | 0.007752576 | 2.7411995 | up |
| ASMM9PARTA031492 | Cregl         | 0.001135305 | 2.5291033 | up |

|                  |               |             |            |    |
|------------------|---------------|-------------|------------|----|
| ASMM9PARTA029385 | Tuba1c        | 0.013628778 | 3.1992228  | up |
| ASMM9PARTA030216 | Hemt1         | 0.000238    | 4.223135   | up |
| ASMM9PARTA044740 | A530032D15Rik | 0.000704    | 2.4376726  | up |
| ASMM9PARTA041728 | Lnpep         | 0.010949393 | 2.5059986  | up |
| ASMM9PARTA032336 | Hgfac         | 0.00000172  | 40.631905  | up |
| ASMM9PARTA033295 | Gmfg          | 0.005694846 | 2.247543   | up |
| ASMM9PARTA020325 | Olfir288      | 0.0000361   | 4.521481   | up |
| ASMM9PARTA033515 | H2-Q8         | 0.000229    | 5.4798155  | up |
| ASMM9PARTA037842 | Bglap-rs1     | 0.000291    | 2.2649064  | up |
| ASMM9PARTA039455 | Galnt7        | 0.000368    | 3.3095207  | up |
| ASMM9PARTA039696 | Stap2         | 0.000221    | 3.4181423  | up |
| ASMM9PARTA036465 | Cda           | 0.000000168 | 2.100513   | up |
| ASMM9PARTA032473 | Lgals8        | 0.03650354  | 2.1091764  | up |
| ASMM9PARTA037972 | Gpr84         | 0.0000824   | 2.4234054  | up |
| ASMM9PARTA044719 | Cxcl3         | 0.004220351 | 14.844567  | up |
| ASMM9PARTA038294 | Edaradd       | 0.000585    | 3.18391    | up |
| ASMM9PARTA027011 | Mup15         | 0.0000247   | 3.8392856  | up |
| ASMM9PARTA042368 | Ccdc88a       | 0.000924    | 2.525976   | up |
| ASMM9PARTA034174 | Cks2          | 0.00848776  | 3.1781802  | up |
| ASMM9PARTA028364 | Gzmm          | 0.01956766  | 2.566282   | up |
| ASMM9PARTA027778 | Fzd8          | 0.001038831 | 2.8540072  | up |
| ASMM9PARTA019738 | Rhox8         | 0.006942352 | 2.4696825  | up |
| ASMM9PARTA021003 | Trpm3         | 0.0000333   | 15.922824  | up |
| ASMM9PARTA041572 | A730008H23Rik | 0.00034     | 3.3139248  | up |
| ASMM9PARTA030554 | Nnmt          | 0.000104    | 12.062769  | up |
| ASMM9PARTA027525 | Gcgr          | 0.027601104 | 2.6900043  | up |
| ASMM9PARTA020765 | BC026782      | 0.001747812 | 2.427853   | up |
| ASMM9PARTA042620 | Esrp2         | 0.0000256   | 4.0884886  | up |
| ASMM9PARTA039331 | Gpx6          | 0.000272    | 2.9223735  | up |
| ASMM9PARTA028997 | Tff1          | 0.0000742   | 8.1746235  | up |
| ASMM9PARTA029555 | Cdk6          | 0.021065174 | 6.506502   | up |
| ASMM9PARTA024293 | Nr6a1         | 0.033313368 | 2.6152036  | up |
| ASMM9PARTA029942 | F2            | 0.00000138  | 15.673193  | up |
| ASMM9PARTA022450 | 0610010O12Rik | 0.001779541 | 2.0968406  | up |
| ASMM9PARTA028119 | Orml          | 0.00000196  | 113.098274 | up |
| ASMM9PARTA021399 | Rhox4d        | 0.00000879  | 2.050915   | up |
| ASMM9PARTA028672 | Raet1a        | 0.001972397 | 3.3672519  | up |
| ASMM9PARTA030693 | Plaur         | 0.020061687 | 2.7258368  | up |
| ASMM9PARTA025875 | Slc38a10      | 0.000048    | 2.1809382  | up |
| ASMM9PARTA038789 | Stard4        | 0.001689114 | 2.138523   | up |
| ASMM9PARTA034146 | Krtap3-3      | 0.024097081 | 2.319153   | up |
| ASMM9PARTA043245 | Gm14461       | 0.031990055 | 2.5192304  | up |
| ASMM9PARTA030967 | Thoc4         | 0.000000611 | 2.2027664  | up |
| ASMM9PARTA032400 | Ddx21         | 0.015749132 | 2.2053607  | up |
| ASMM9PARTA037852 | Loxl2         | 0.001140768 | 14.573694  | up |
| ASMM9PARTA030813 | Stat5b        | 0.001490296 | 2.526246   | up |
| ASMM9PARTA034762 | Ceacam14      | 0.008290645 | 2.357579   | up |
| ASMM9PARTA038095 | GlrX          | 0.00000117  | 2.4497848  | up |
| ASMM9PARTA023707 | Apobec1       | 0.00195491  | 3.3674955  | up |
| ASMM9PARTA034935 | 2010011I20Rik | 0.000356    | 2.3976474  | up |
| ASMM9PARTA026261 | Ankrd55       | 0.0000171   | 3.3367715  | up |
| ASMM9PARTA020206 | Cdhr3         | 0.001257422 | 3.440596   | up |
| ASMM9PARTA034294 | Slc16a9       | 0.00016     | 4.3543863  | up |
| ASMM9PARTA039612 | Duoxa1        | 0.001844626 | 2.374134   | up |
| ASMM9PARTA030022 | H2-Q10        | 0.004063776 | 2.001443   | up |
| ASMM9PARTA020828 | Cpxcr1        | 0.01748431  | 2.6426196  | up |
| ASMM9PARTA043087 | Igsf1         | 0.047533356 | 2.4877734  | up |



|                  |               |             |           |    |
|------------------|---------------|-------------|-----------|----|
| ASMM9PARTA034026 | Trim12a       | 0.000145    | 2.1414542 | up |
| ASMM9PARTA019664 | BC057022      | 0.000014    | 2.137938  | up |
| ASMM9PARTA023147 | Snx12         | 0.0000581   | 2.3290365 | up |
| ASMM9PARTA023267 | Aqp8          | 0.010882038 | 4.8572707 | up |
| ASMM9PARTA025627 | Vmn1r168      | 0.000123    | 3.3357494 | up |
| ASMM9PARTA027216 | Trp53inp1     | 0.02127502  | 5.8145533 | up |
| ASMM9PARTA030745 | Serpina3k     | 0.000191    | 16.174522 | up |
| ASMM9PARTA027319 | Nr0b1         | 0.002982293 | 2.3163462 | up |
| ASMM9PARTA026365 | Arpc4         | 0.001644487 | 2.3961735 | up |
| ASMM9PARTA043807 | 6030498E09Rik | 0.027906979 | 2.1940942 | up |
| ASMM9PARTA025384 | Puf60         | 0.00000241  | 2.672495  | up |
| ASMM9PARTA037434 | Rpe65         | 0.00036     | 2.299696  | up |
| ASMM9PARTA044790 | Vmn1r177      | 0.00098     | 5.449634  | up |
| ASMM9PARTA030329 | Zbtb7a        | 0.0000576   | 2.0259032 | up |
| ASMM9PARTA041502 | Snx30         | 0.002051058 | 2.5296726 | up |
| ASMM9PARTA030475 | Nfkbil1       | 0.002694815 | 2.279042  | up |
| ASMM9PARTA033840 | Pla2g12b      | 0.006538657 | 4.1356807 | up |
| ASMM9PARTA023730 | Atp13a3       | 0.000125    | 6.806229  | up |
| ASMM9PARTA032853 | Fam48a        | 0.048817344 | 6.4496555 | up |
| ASMM9PARTA041379 | Cpne2         | 0.002825001 | 2.0892766 | up |
| ASMM9PARTA028173 | Serpina3c     | 0.001344137 | 2.8078647 | up |
| ASMM9PARTA031158 | Saa3          | 5.79E-08    | 414.05643 | up |
| ASMM9PARTA034766 | Lipt2         | 0.000871    | 2.0137596 | up |
| ASMM9PARTA027739 | F9            | 0.003993888 | 8.055491  | up |
| ASMM9PARTA031384 | Zfp9          | 0.006402783 | 2.2850375 | up |
| ASMM9PARTA032047 | Tnfrsf12a     | 0.0000175   | 5.7876096 | up |
| ASMM9PARTA021422 | Sel1l         | 0.00000143  | 6.379078  | up |
| ASMM9PARTA041081 | Olf1r711      | 0.011204711 | 3.0466328 | up |
| ASMM9PARTA026501 | Magi2         | 0.010340264 | 2.3900032 | up |
| ASMM9PARTA035464 | Srrm4         | 0.0000683   | 2.5102985 | up |
| ASMM9PARTA039467 | Slc44a3       | 0.00103898  | 3.9473743 | up |
| ASMM9PARTA029782 | Dffa          | 0.0000269   | 2.1218286 | up |
| ASMM9PARTA023696 | Mup9          | 0.002020386 | 6.029093  | up |
| ASMM9PARTA029581 | Cga           | 0.0000947   | 3.5618737 | up |
| ASMM9PARTA037740 | Slco2a1       | 0.00000761  | 8.408813  | up |
| ASMM9PARTA038658 | Chpf2         | 0.016918479 | 2.398154  | up |
| ASMM9PARTA042044 | Sc5d          | 0.00000077  | 6.154465  | up |
| ASMM9PARTA022193 | Gm6484        | 0.005445675 | 4.9623146 | up |
| ASMM9PARTA027261 | C4bp          | 0.000049    | 11.261244 | up |
| ASMM9PARTA040198 | Actr2         | 0.001118875 | 2.373445  | up |
| ASMM9PARTA027362 | Apoa4         | 0.00002     | 41.79531  | up |
| ASMM9PARTA028386 | Hsp90ab1      | 0.0000168   | 3.3226452 | up |
| ASMM9PARTA024967 | Ces2e         | 0.00000226  | 8.396423  | up |
| ASMM9PARTA032331 | Rplp1         | 0.0000597   | 2.2746043 | up |
| ASMM9PARTA032428 | Itih4         | 0.004918584 | 2.2723079 | up |
| ASMM9PARTA037288 | Ocel1         | 0.00017     | 3.6030266 | up |
| ASMM9PARTA027851 | Mst1          | 0.00021     | 9.569627  | up |
| ASMM9PARTA031235 | Slc10a2       | 0.019884001 | 3.6096091 | up |
| ASMM9PARTA037984 | E2f6          | 0.0000319   | 2.7200866 | up |
| ASMM9PARTA022138 | Adamts14      | 0.000305    | 2.076006  | up |
| ASMM9PARTA030591 | Plunc         | 0.00000875  | 29.511639 | up |
| ASMM9PARTA026575 | Gm7849        | 0.001405813 | 3.4973295 | up |
| ASMM9PARTA024458 | Casz1         | 0.000623    | 3.6816106 | up |
| ASMM9PARTA031164 | Slfn2         | 0.000862    | 2.1003532 | up |
| ASMM9PARTA033950 | Rab27a        | 0.000398    | 2.8668993 | up |
| ASMM9PARTA031317 | Csda          | 0.005746611 | 2.2715404 | up |
| ASMM9PARTA030460 | Uhmkl         | 0.003656815 | 2.0136213 | up |

|                  |               |             |           |    |
|------------------|---------------|-------------|-----------|----|
| ASMM9PARTA026421 | Plch1         | 0.001441778 | 2.107422  | up |
| ASMM9PARTA035005 | Serpina12     | 0.002748228 | 4.7023416 | up |
| ASMM9PARTA034001 | Tnfrsf23      | 0.003493739 | 3.771012  | up |
| ASMM9PARTA030637 | Saa2          | 0.00000458  | 28.281317 | up |
| ASMM9PARTA031579 | Apoa2         | 0.001091969 | 2.5937545 | up |
| ASMM9PARTA021979 | Repin1        | 0.04352855  | 2.046069  | up |
| ASMM9PARTA030104 | Hmox1         | 0.000665    | 2.5138047 | up |
| ASMM9PARTA030950 | Rps7          | 0.000113    | 2.2714653 | up |
| ASMM9PARTA031533 | Gdf15         | 0.020617852 | 2.7145615 | up |
| ASMM9PARTA035631 | Snrpf         | 0.0000829   | 2.1035519 | up |
| ASMM9PARTA031300 | Lyz1          | 0.0000213   | 2.1884444 | up |
| ASMM9PARTA026178 | Rbms3         | 0.000689    | 2.3543537 | up |
| ASMM9PARTA027749 | Gh            | 0.000000589 | 8.723904  | up |
| ASMM9PARTA026204 | Wdr33         | 0.003226724 | 7.2382317 | up |
| ASMM9PARTA043014 | Lamp3         | 0.00095     | 3.015213  | up |
| ASMM9PARTA028812 | Serpina1d     | 0.00000629  | 9.349753  | up |
| ASMM9PARTA031026 | Spink4        | 0.006535773 | 2.481017  | up |
| ASMM9PARTA022749 | Pnmal2        | 0.016980287 | 2.04741   | up |
| ASMM9PARTA038894 | Ces3b         | 0.027511071 | 2.1117733 | up |
| ASMM9PARTA028931 | Spp1          | 0.000742    | 3.3085916 | up |
| ASMM9PARTA025573 | Arhgap8       | 0.000123    | 2.0207765 | up |
| ASMM9PARTA030350 | Foxa2         | 0.0232851   | 2.0586498 | up |
| ASMM9PARTA023632 | Qser1         | 0.002058371 | 2.2529674 | up |
| ASMM9PARTA022734 | Gm11428       | 0.000249    | 5.7920837 | up |
| ASMM9PARTA042630 | Micall1       | 0.0000493   | 2.5832434 | up |
| ASMM9PARTA037470 | Pmch          | 1.21E-08    | 258.39825 | up |
| ASMM9PARTA031956 | Nox4          | 0.030720923 | 2.16569   | up |
| ASMM9PARTA033857 | Rps25         | 0.0000367   | 2.2141914 | up |
| ASMM9PARTA037035 | Lym7          | 0.0000234   | 2.60048   | up |
| ASMM9PARTA031590 | Abcc2         | 0.004844309 | 4.305907  | up |
| ASMM9PARTA028696 | Resp18        | 0.00000723  | 2.428444  | up |
| ASMM9PARTA035707 | 4921528I01Rik | 0.03904229  | 2.5018775 | up |
| ASMM9PARTA024658 | Birc7         | 0.0000357   | 2.0268214 | up |
| ASMM9PARTA027754 | Cd1d2         | 0.00575796  | 2.294848  | up |
| ASMM9PARTA031905 | Tcf20         | 0.008389055 | 2.2062988 | up |
| ASMM9PARTA042837 | 4833442J19Rik | 0.03905804  | 2.5352    | up |
| ASMM9PARTA029754 | Avp           | 2.08E-08    | 29.416008 | up |
| ASMM9PARTA024541 | Wdsub1        | 0.000081    | 3.6814578 | up |
| ASMM9PARTA033277 | Cxcl10        | 0.000228    | 3.2498384 | up |
| ASMM9PARTA024004 | Dedd          | 0.002877288 | 3.3849053 | up |
| ASMM9PARTA036649 | Fezf1         | 0.011198795 | 5.4864078 | up |
| ASMM9PARTA029430 | Akap2         | 0.0000106   | 2.3201954 | up |
| ASMM9PARTA039911 | Habp2         | 0.003987792 | 3.558833  | up |
| ASMM9PARTA031558 | C9            | 0.0000264   | 6.125046  | up |
| ASMM9PARTA020625 | Ttbk2         | 0.03833984  | 2.1436286 | up |
| ASMM9PARTA030011 | E2f3          | 0.001955219 | 2.407097  | up |
| ASMM9PARTA023663 | Ndufaf2       | 0.0000478   | 2.03734   | up |
| ASMM9PARTA044240 | Raet1e        | 0.00000734  | 11.305048 | up |
| ASMM9PARTA044533 | Zfp933        | 0.000000143 | 9.04388   | up |
| ASMM9PARTA029751 | Alox5         | 0.001309168 | 3.1652672 | up |
| ASMM9PARTA025739 | Vill          | 0.00057     | 4.4524846 | up |
| ASMM9PARTA034685 | Plin3         | 0.003518721 | 2.2826416 | up |
| ASMM9PARTA037987 | Bcl3          | 0.000916    | 2.3514645 | up |
| ASMM9PARTA027409 | Crp           | 0.0000745   | 4.7335916 | up |
| ASMM9PARTA027912 | Dcn           | 0.015172899 | 2.6361022 | up |
| ASMM9PARTA042381 | Gm5077        | 0.000641    | 13.011049 | up |
| ASMM9PARTA035367 | Ifi35         | 0.0000982   | 2.0831928 | up |

|                      |               |             |           |    |
|----------------------|---------------|-------------|-----------|----|
| ASMM9PARTA035686     | Slc38a4       | 0.001025338 | 38.25997  | up |
| ASMM9PARTA028062     | Hsd17b2       | 0.0000111   | 11.364622 | up |
| ASMM9PARTA028133     | Foxa3         | 0.001469045 | 4.6386027 | up |
| ASMM9PARTA039433     | Creb3l3       | 0.000402    | 3.0500357 | up |
| ASMM9PARTA034319     | Snw1          | 0.00742151  | 2.413834  | up |
| ASMM9PARTA037436     | Rnase6        | 0.0000066   | 2.1696317 | up |
| ASMM9PARTA023049     | Igf1          | 0.0000594   | 7.778342  | up |
| ASMM9PARTA031796     | Ccl4          | 0.0000137   | 3.4641204 | up |
| ASMM9PARTA029518     | Cldn3         | 0.001098972 | 3.028855  | up |
| ASMM9PARTA019859     | Zfp456        | 0.004211577 | 2.6347463 | up |
| ASMM9PARTA022425     | Gm5483        | 0.0000175   | 4.5535755 | up |
| ASMM9PARTA038500     | Prss8         | 0.002494392 | 2.0111601 | up |
| ASMM9PARTA027841     | Fgfr4         | 0.000505    | 3.4631393 | up |
| ASMM9PARTA031778     | Akr1c12       | 0.000835    | 3.4179604 | up |
| ASMM9PARTA041521     | D330028D13Rik | 0.00222751  | 2.308562  | up |
| ASMM9PARTA022286     | Agmat         | 0.00000254  | 2.726005  | up |
| ASMM9PARTA028864     | Pet2          | 0.002817479 | 2.4380143 | up |
| ASMM9PARTA038652     | C8b           | 0.00024     | 2.2138696 | up |
| ASMM9PARTA038468     | Qprt          | 0.001100669 | 2.3098123 | up |
| ASMM9PARTA039373     | BC016495      | 0.00000407  | 2.8812213 | up |
| ASMM9PARTA036363     | Slc16a10      | 0.000609    | 2.0354002 | up |
| ASMM9PARTA023692     | Gm10639       | 0.000000879 | 44.005497 | up |
| ASMM9PARTA043521     | Gprc5a        | 0.001049031 | 8.000126  | up |
| ASMM9PARTA030995     | Sdc4          | 0.000154    | 2.2519653 | up |
| ASMM9PARTA023518     | Cry2          | 0.00915407  | 2.5259638 | up |
| ASMM9PARTA037101     | Pibfl         | 0.00300567  | 2.1851645 | up |
| ASMM9PARTA042594     | Hnrnp1        | 0.0000131   | 4.2074776 | up |
| ASMM9PARTA028583     | Mup2          | 0.000576    | 4.033117  | up |
| ASMM9PARTA029115     | Ugdh          | 0.001040847 | 2.4593058 | up |
| CUST 301 PI426409190 | Ccl21b        | 0.00000177  | 20.291157 | up |
| ASMM9PARTA037372     | Niacr1        | 0.000281    | 5.6197925 | up |
| ASMM9PARTA025528     | Rpa1          | 0.00000429  | 2.6643112 | up |
| ASMM9PARTA035680     | Mybphl        | 0.007865036 | 2.0384648 | up |
| ASMM9PARTA043209     | Nags          | 0.013987481 | 4.3649054 | up |
| ASMM9PARTA032730     | Ppp4c         | 0.00000741  | 2.5375283 | up |
| ASMM9PARTA030538     | Lox           | 0.005529475 | 4.8754272 | up |
| ASMM9PARTA029410     | Cat           | 0.005655123 | 2.0568285 | up |
| ASMM9PARTA032217     | Pdlim1        | 0.000712    | 3.0753212 | up |
| ASMM9PARTA027611     | Cd1d1         | 0.001594411 | 2.2484355 | up |
| ASMM9PARTA034718     | Kdelr2        | 0.0000384   | 2.010544  | up |
| ASMM9PARTA037296     | D730039F16Rik | 0.00023     | 3.5145981 | up |
| ASMM9PARTA029368     | C4b           | 0.0000815   | 2.8149116 | up |
| ASMM9PARTA021431     | 1110020G09Rik | 0.0000413   | 2.4329476 | up |
| ASMM9PARTA023169     | Vegfa         | 0.000516    | 2.7881508 | up |
| ASMM9PARTA031704     | Syt14         | 0.000106    | 3.8239303 | up |
| ASMM9PARTA044394     | Suz12         | 0.000176    | 2.3202207 | up |
| ASMM9PARTA030354     | Krt18         | 0.000258    | 14.124053 | up |
| ASMM9PARTA037468     | Preli2        | 0.000254    | 3.4856331 | up |
| ASMM9PARTA027052     | Mup14         | 0.000066    | 4.0962605 | up |
| ASMM9PARTA020162     | Olfr287       | 0.0000283   | 3.4687903 | up |
| ASMM9PARTA027812     | Ces1c         | 0.0000665   | 97.91323  | up |
| ASMM9PARTA043400     | Smg5          | 0.014851349 | 3.860313  | up |
| ASMM9PARTA028216     | Lcn2          | 0.000097    | 16.299862 | up |
| ASMM9PARTA036318     | Chst13        | 0.018690148 | 2.2081044 | up |
| ASMM9PARTA024920     | Hsd17b13      | 0.000897    | 13.791368 | up |
| ASMM9PARTA029133     | Sparc         | 0.0000316   | 2.0778835 | up |
| ASMM9PARTA026143     | Gml           | 0.00000124  | 42.146217 | up |

|                  |               |             |           |    |
|------------------|---------------|-------------|-----------|----|
| ASMM9PARTA021573 | Hhip1l        | 0.001580138 | 2.0586634 | up |
| ASMM9PARTA024273 | Heph          | 0.0000252   | 2.572323  | up |
| ASMM9PARTA028041 | Igfbp1        | 0.001003954 | 72.06436  | up |
| ASMM9PARTA028676 | Rbbp4         | 0.000139    | 2.2319345 | up |
| ASMM9PARTA032433 | Akr1e1        | 0.0000105   | 2.3874621 | up |
| ASMM9PARTA022180 | Dscaml1       | 0.00187705  | 4.9332957 | up |
| ASMM9PARTA031986 | Siva1         | 0.0000736   | 2.028586  | up |
| ASMM9PARTA029285 | Apoc2         | 0.0000168   | 31.691927 | up |
| ASMM9PARTA039353 | Ugt3a2        | 0.003386629 | 2.617361  | up |
| ASMM9PARTA041493 | Igsf1l        | 0.008826348 | 2.3468804 | up |
| ASMM9PARTA031072 | Aadat         | 0.006909219 | 2.1991866 | up |
| ASMM9PARTA029238 | St3gal1       | 0.020810049 | 4.504363  | up |
| ASMM9PARTA043801 | Fgb           | 0.000113    | 11.481888 | up |
| ASMM9PARTA021113 | Rbfox3        | 0.00000991  | 2.0557194 | up |
| ASMM9PARTA032825 | Nmu           | 0.008421083 | 2.093813  | up |
| ASMM9PARTA032954 | Xpo4          | 0.023522532 | 2.8404458 | up |
| ASMM9PARTA034167 | Ost4          | 0.000143    | 3.1899166 | up |
| ASMM9PARTA024373 | Ralgps2       | 0.011027404 | 3.9167283 | up |
| ASMM9PARTA027001 | H2-Q7         | 0.0000105   | 4.103018  | up |
| ASMM9PARTA027853 | Hmgcr         | 0.000401    | 3.3769875 | up |
| ASMM9PARTA022268 | 4930420K17Rik | 0.000051    | 2.050795  | up |
| ASMM9PARTA040053 | Spin1         | 0.001593003 | 3.4519377 | up |
| ASMM9PARTA024350 | Lgals3        | 0.002844939 | 5.1167016 | up |
| ASMM9PARTA039318 | Zgpat         | 0.00330595  | 2.9541237 | up |
| ASMM9PARTA028139 | Itgav         | 0.000386    | 2.2432432 | up |
| ASMM9PARTA039119 | Otub1         | 0.0000348   | 3.73413   | up |
| ASMM9PARTA032786 | Cyp39a1       | 0.02573643  | 2.105585  | up |
| ASMM9PARTA026406 | Hnrnpc        | 0.0000217   | 2.020353  | up |
| ASMM9PARTA043978 | Adm2          | 0.02216197  | 2.2131064 | up |
| ASMM9PARTA038252 | Serpinc1      | 0.000749    | 2.8415508 | up |
| ASMM9PARTA027647 | Cdh2          | 0.00000125  | 2.1119945 | up |
| ASMM9PARTA030789 | Oxt           | 0.00000417  | 4.102523  | up |
| ASMM9PARTA029858 | Hcrt          | 9.61E-08    | 24.200073 | up |
| ASMM9PARTA025515 | Ces3a         | 0.024452582 | 3.798743  | up |
| ASMM9PARTA035366 | 1700029I01Rik | 0.000899    | 2.4929442 | up |
| ASMM9PARTA033712 | Gmfb          | 0.00000643  | 4.1477666 | up |
| ASMM9PARTA020713 | Trem12        | 0.004515789 | 2.0475903 | up |
| ASMM9PARTA030741 | Slpi          | 0.00012     | 2.3125417 | up |
| ASMM9PARTA041441 | Ehmt1         | 0.002932166 | 2.2254846 | up |
| ASMM9PARTA019886 | Mup21         | 0.000251    | 4.117441  | up |
| ASMM9PARTA043954 | Pla2g12a      | 0.0000473   | 2.8609784 | up |
| ASMM9PARTA042288 | Mast4         | 0.0000322   | 3.3681803 | up |
| ASMM9PARTA031468 | Ahsg          | 0.00000792  | 63.267982 | up |
| ASMM9PARTA030019 | Gast          | 0.005117104 | 2.398121  | up |
| ASMM9PARTA029070 | Tff2          | 0.001862454 | 2.9928102 | up |
| ASMM9PARTA036814 | Ascc2         | 0.034408186 | 2.1254933 | up |
| ASMM9PARTA042803 | Auts2         | 0.023788653 | 2.0385022 | up |
| ASMM9PARTA029376 | Cst7          | 0.0000147   | 28.451078 | up |
| ASMM9PARTA036138 | Gpr160        | 0.003222467 | 2.720788  | up |
| ASMM9PARTA029329 | Nr2f2         | 0.00000434  | 2.7463613 | up |
| ASMM9PARTA027514 | Epx           | 0.001142116 | 2.2969182 | up |
| ASMM9PARTA020844 | Gpr101        | 0.0000266   | 2.8552547 | up |
| ASMM9PARTA032745 | Raet1d        | 0.008178433 | 6.9452195 | up |
| ASMM9PARTA025339 | Taok2         | 0.0000623   | 2.1198497 | up |
| ASMM9PARTA044542 | Kng2          | 0.034501813 | 3.7658525 | up |
| ASMM9PARTA032877 | Rbpms         | 0.0000302   | 7.87497   | up |
| ASMM9PARTA036324 | Rpap3         | 0.00000501  | 3.1804552 | up |

|                      |               |             |           |    |
|----------------------|---------------|-------------|-----------|----|
| ASMM9PARTA023991     | Gtpbp2        | 0.000101    | 6.130596  | up |
| ASMM9PARTA036806     | Scpep1        | 0.000247    | 2.693094  | up |
| ASMM9PARTA036721     | Ms4a6c        | 0.016382767 | 2.2200701 | up |
| ASMM9PARTA041892     | Apol9b        | 0.000094    | 2.4350379 | up |
| ASMM9PARTA027427     | Btc           | 0.020730374 | 4.0981374 | up |
| ASMM9PARTA035135     | Rnf125        | 0.016935294 | 4.8795605 | up |
| ASMM9PARTA032664     | Pdim5         | 0.006587386 | 2.5099127 | up |
| ASMM9PARTA044762     | Tas2r118      | 0.024353009 | 2.5062876 | up |
| ASMM9PARTA044231     | Zfp748        | 0.0000972   | 2.2528467 | up |
| ASMM9PARTA029552     | Cd14          | 0.000101    | 9.017542  | up |
| ASMM9PARTA032848     | Mgst1         | 0.0000472   | 3.7809577 | up |
| ASMM9PARTA041996     | 4933427D06Rik | 0.01168011  | 2.3441842 | up |
| ASMM9PARTA043748     | 8030462N17Rik | 0.004912888 | 2.8925185 | up |
| ASMM9PARTA029965     | Kcnk7         | 0.001631738 | 3.5135715 | up |
| ASMM9PARTA037317     | Slamf9        | 0.00011     | 2.6655169 | up |
| ASMM9PARTA030926     | Xdh           | 0.000151    | 2.9719703 | up |
| ASMM9PARTA020141     | Rsl1          | 0.000335    | 2.2151175 | up |
| ASMM9PARTA041866     | Sdad1         | 0.0064692   | 2.714591  | up |
| ASMM9PARTA033890     | 4930455C21Rik | 0.000816    | 2.0300548 | up |
| ASMM9PARTA020403     | Mup20         | 0.004008365 | 2.2794495 | up |
| ASMM9PARTA028967     | Tgif1         | 0.002707013 | 5.6542225 | up |
| ASMM9PARTA044801     | Yipf6         | 0.0000196   | 2.4330988 | up |
| ASMM9PARTA027494     | Bglap         | 0.000364    | 2.3509836 | up |
| ASMM9PARTA035715     | Xrcc6bp1      | 0.000033    | 3.8774858 | up |
| ASMM9PARTA043449     | Tmem59l       | 0.0000333   | 2.402623  | up |
| ASMM9PARTA029947     | Gal           | 0.000038    | 3.5598576 | up |
| ASMM9PARTA034121     | Rps23         | 0.000306    | 2.1048717 | up |
| CUST_299_PI426409190 | E130304F04Rik | 0.00000108  | 3.5103202 | up |
| ASMM9PARTA026207     | Lman1         | 0.001720772 | 2.3811665 | up |
| ASMM9PARTA023237     | Lrrc61        | 0.00088     | 5.1497025 | up |
| ASMM9PARTA033482     | Ankrd36       | 0.027580054 | 2.1191888 | up |
| ASMM9PARTA030661     | Ccl9          | 0.007576852 | 2.1715953 | up |
| ASMM9PARTA028157     | Nppb          | 0.001280286 | 2.4996884 | up |
| ASMM9PARTA031696     | Lhcgr         | 0.011774275 | 2.0191789 | up |
| ASMM9PARTA030449     | Pon1          | 0.002029699 | 32.559986 | up |
| ASMM9PARTA032243     | Irf7          | 0.000172    | 3.7917817 | up |
| ASMM9PARTA028318     | Itih3         | 0.000185    | 3.1124713 | up |
| ASMM9PARTA021768     | Slc7a2        | 0.036042158 | 3.4497433 | up |
| ASMM9PARTA039113     | BC021614      | 0.000414    | 5.6115894 | up |
| ASMM9PARTA029837     | Cyp1a2        | 0.03180321  | 2.565639  | up |
| ASMM9PARTA024728     | Cacna1c       | 0.008767873 | 2.3442287 | up |
| ASMM9PARTA036473     | 3110007F17Rik | 0.000218    | 2.1131096 | up |
| ASMM9PARTA025222     | Rpap2         | 0.0000112   | 3.180098  | up |
| ASMM9PARTA044938     | H2-Q6         | 0.000061    | 2.869144  | up |
| ASMM9PARTA031598     | Schip1        | 0.0000199   | 3.878496  | up |
| ASMM9PARTA038379     | Pcdhb4        | 0.000295    | 2.6566732 | up |
| ASMM9PARTA030879     | Ccl2          | 0.003864357 | 8.909244  | up |
| ASMM9PARTA030873     | Rbp4          | 0.0000221   | 8.998395  | up |
| ASMM9PARTA021618     | Scoc          | 0.002892829 | 2.0524821 | up |
| ASMM9PARTA032569     | Il22          | 0.0000482   | 3.3923943 | up |
| ASMM9PARTA044577     | Dand5         | 0.009242218 | 2.6468854 | up |
| ASMM9PARTA044611     | Ugt1a6b       | 0.017883386 | 3.0295238 | up |
| ASMM9PARTA039143     | Csde1         | 0.0010392   | 2.1164172 | up |
| ASMM9PARTA042986     | Cyp2r1        | 0.000334    | 2.4225907 | up |
| ASMM9PARTA025511     | Zfp809        | 0.02032749  | 2.5243971 | up |
| ASMM9PARTA040545     | Olfir26       | 0.041912567 | 2.1035762 | up |
| ASMM9PARTA021646     | Tnpo1         | 0.00026     | 2.1353512 | up |

|                  |               |             |            |    |
|------------------|---------------|-------------|------------|----|
| ASMM9PARTA039242 | Zfp52         | 0.018240057 | 2.114476   | up |
| ASMM9PARTA024523 | Celf4         | 0.000126    | 31.656782  | up |
| ASMM9PARTA039330 | Ifi2712b      | 0.007289839 | 10.862768  | up |
| ASMM9PARTA038827 | Fgg           | 0.000381    | 15.540054  | up |
| ASMM9PARTA031375 | Ankrd1        | 0.013789926 | 5.9971714  | up |
| ASMM9PARTA035141 | Rab32         | 0.0028951   | 2.463117   | up |
| ASMM9PARTA033670 | Stard3nl      | 0.0000391   | 2.0058455  | up |
| ASMM9PARTA044835 | Acsn3         | 0.00081     | 9.307004   | up |
| ASMM9PARTA036809 | 4930503E14Rik | 0.000135    | 3.0085163  | up |
| ASMM9PARTA021869 | Rbpms         | 0.00000108  | 20.253654  | up |
| ASMM9PARTA031019 | Ccl3          | 0.0000154   | 11.9296665 | up |
| ASMM9PARTA023356 | Igf1          | 0.0000745   | 4.6334696  | up |
| ASMM9PARTA039598 | Fgl1          | 0.000222    | 12.549015  | up |
| ASMM9PARTA036186 | Lrrc8e        | 0.006220999 | 3.0200787  | up |
| ASMM9PARTA041661 | Otop1         | 0.0000666   | 2.195905   | up |
| ASMM9PARTA029202 | Sntb2         | 0.014195433 | 2.4726825  | up |
| ASMM9PARTA027996 | Gpr65         | 0.0000536   | 2.5031261  | up |
| ASMM9PARTA037349 | Hyls1         | 0.007830146 | 2.352997   | up |
| ASMM9PARTA027195 | Arf5          | 0.0000955   | 2.477853   | up |
| ASMM9PARTA030446 | P2rx7         | 0.0000466   | 2.2264807  | up |
| ASMM9PARTA033359 | Bcmo1         | 0.0000623   | 5.2967863  | up |
| ASMM9PARTA023555 | Ncam1         | 0.0000882   | 2.203308   | up |
| ASMM9PARTA039414 | Defb7         | 0.012819974 | 3.9362533  | up |
| ASMM9PARTA034233 | Fabp4         | 0.0000552   | 29.398123  | up |
| ASMM9PARTA044600 | Ces3a         | 0.000457    | 4.116418   | up |
| ASMM9PARTA024981 | Mup1          | 0.002101019 | 3.4760346  | up |
| ASMM9PARTA030989 | Stat3         | 0.0000517   | 2.0114586  | up |
| ASMM9PARTA041636 | Nup214        | 0.000491    | 2.962114   | up |
| ASMM9PARTA026835 | Krtap22-2     | 0.009635109 | 2.6987276  | up |
| ASMM9PARTA043526 | Eif5          | 0.00013     | 3.4526772  | up |
| ASMM9PARTA038214 | Ftcd          | 0.023490246 | 3.7166464  | up |
| ASMM9PARTA038525 | Ghitm         | 0.000189    | 2.1687162  | up |
| ASMM9PARTA035781 | Prdm16        | 0.011750553 | 4.48461    | up |
| ASMM9PARTA029506 | Atox1         | 0.000344    | 2.4388926  | up |
| ASMM9PARTA038540 | Arhgef5       | 0.000204    | 2.697708   | up |
| ASMM9PARTA036069 | 0610007L01Rik | 0.00248166  | 3.8975668  | up |
| ASMM9PARTA042071 | Apol9a        | 0.003922888 | 2.0051203  | up |
| ASMM9PARTA039388 | Etf1          | 0.000165    | 2.2974086  | up |
| ASMM9PARTA032311 | Sult1d1       | 0.000936    | 60.817657  | up |
| ASMM9PARTA041881 | Ttc34         | 0.005233511 | 2.199763   | up |
| ASMM9PARTA027626 | Egfr          | 0.001027634 | 6.3252134  | up |
| ASMM9PARTA031936 | Shox2         | 0.000934    | 2.2560925  | up |
| ASMM9PARTA044481 | Tes           | 0.007768372 | 5.3008294  | up |
| ASMM9PARTA025692 | Mau2          | 0.00550533  | 2.2039864  | up |
| ASMM9PARTA023995 | Lgals9        | 0.000736    | 2.2455807  | up |
| ASMM9PARTA039937 | Ces2c         | 0.028537132 | 2.085048   | up |
| ASMM9PARTA042954 | Crebl2        | 0.005826204 | 2.3372114  | up |
| ASMM9PARTA032344 | Agxt          | 0.000277    | 5.1507273  | up |
| ASMM9PARTA023341 | Apoc1         | 0.004358233 | 5.8044868  | up |
| ASMM9PARTA033471 | Myl7          | 0.002140165 | 3.056162   | up |
| ASMM9PARTA029204 | Serpina1a     | 0.0000288   | 6.874818   | up |
| ASMM9PARTA024236 | Pvrl2         | 0.01866922  | 2.2335699  | up |
| ASMM9PARTA024554 | Slc25a2       | 0.0000234   | 5.084941   | up |
| ASMM9PARTA039185 | Lactb2        | 0.003722836 | 2.1924458  | up |
| ASMM9PARTA032130 | Dmp1          | 0.0000294   | 2.2168965  | up |
| ASMM9PARTA032235 | Prok2         | 0.001523164 | 2.1034334  | up |
| ASMM9PARTA030978 | Rlim          | 0.0002      | 2.029492   | up |

|                      |               |             |           |    |
|----------------------|---------------|-------------|-----------|----|
| ASMM9PARTA029091     | Sfrp2         | 0.000518    | 3.3584335 | up |
| ASMM9PARTA029167     | Cxcl2         | 0.013472946 | 3.3868766 | up |
| ASMM9PARTA034601     | Ece2          | 0.000132    | 3.0650053 | up |
| ASMM9PARTA028032     | Gsta2         | 0.0000747   | 49.720745 | up |
| ASMM9PARTA030440     | Nfe2l2        | 0.001895828 | 2.2326274 | up |
| ASMM9PARTA032470     | Abhd2         | 0.000115    | 7.6303153 | up |
| CUST 291 PI426409190 | Ccl21c        | 1.65E-08    | 14.897777 | up |
| ASMM9PARTA037977     | Krt8          | 0.0000418   | 9.841718  | up |
| ASMM9PARTA039789     | Cyp2c70       | 0.0000855   | 29.30503  | up |
| ASMM9PARTA021322     | Smurf1        | 0.003281579 | 2.2037911 | up |
| ASMM9PARTA025104     | Tnnt3         | 0.005287184 | 3.044461  | up |
| ASMM9PARTA032461     | Hp            | 0.00000257  | 19.80505  | up |
| ASMM9PARTA022998     | Acp5          | 0.000147    | 2.543584  | up |
| ASMM9PARTA028833     | Serpine1      | 0.001650085 | 4.822824  | up |
| ASMM9PARTA024812     | Eda2r         | 0.000212    | 3.9022021 | up |
| ASMM9PARTA028348     | Hmx3          | 0.005121595 | 2.6906996 | up |
| ASMM9PARTA032408     | Cyp11a1       | 0.000599    | 2.0628052 | up |
| ASMM9PARTA028993     | Sult2a2       | 0.000305    | 3.4232147 | up |
| ASMM9PARTA026645     | Gngl2         | 0.000166    | 2.2343452 | up |
| ASMM9PARTA023776     | Nmi           | 0.000925    | 2.0037444 | up |
| ASMM9PARTA036769     | 1300002K09Rik | 0.002001623 | 19.304834 | up |
| ASMM9PARTA031028     | Sdc1          | 0.001504632 | 24.963526 | up |
| ASMM9PARTA031711     | Usp18         | 0.027192796 | 2.5585656 | up |
| ASMM9PARTA041797     | Creb5         | 0.009989169 | 3.4842727 | up |
| ASMM9PARTA024722     | Nqo2          | 0.000875    | 4.823249  | up |
| ASMM9PARTA027686     | Cyp3a11       | 0.04274928  | 3.5208766 | up |
| ASMM9PARTA030410     | Nid1          | 0.0000983   | 3.796286  | up |
| ASMM9PARTA032281     | Ly96          | 0.0000395   | 2.0528438 | up |
| ASMM9PARTA034700     | Gprasp1       | 0.001109777 | 2.0680022 | up |
| ASMM9PARTA040038     | Olfir657      | 0.026063085 | 2.6222227 | up |
| ASMM9PARTA036556     | Acot12        | 0.014452996 | 3.6061325 | up |
| ASMM9PARTA025029     | Apol6         | 0.0000404   | 2.0441713 | up |
| ASMM9PARTA020569     | Thoc2         | 0.025761178 | 2.721228  | up |
| ASMM9PARTA042896     | Ubash3b       | 0.00000413  | 2.475525  | up |
| ASMM9PARTA034962     | Zcchc10       | 0.0000811   | 2.2487483 | up |
| ASMM9PARTA034011     | Krt20         | 0.001222408 | 8.8194895 | up |
| ASMM9PARTA023746     | Enpp2         | 0.001136237 | 2.0716453 | up |
| ASMM9PARTA029926     | Gsc           | 0.00117492  | 2.3331435 | up |
| ASMM9PARTA036538     | Tmem55a       | 0.000676    | 2.198758  | up |
| ASMM9PARTA027376     | Cdkn1a        | 0.03258461  | 2.8570483 | up |
| ASMM9PARTA029974     | Dlx3          | 0.049765475 | 2.4345927 | up |
| ASMM9PARTA022143     | Nipal1        | 0.018504541 | 2.6998262 | up |
| ASMM9PARTA019828     | H2-K1         | 0.00000646  | 2.5109093 | up |
| ASMM9PARTA029370     | Cast          | 0.000141    | 2.5134616 | up |
| ASMM9PARTA035066     | Ooep          | 0.000144    | 4.3999467 | up |
| ASMM9PARTA025377     | Erlin1        | 0.01218445  | 2.676347  | up |
| ASMM9PARTA039324     | Afm           | 0.0000422   | 8.265686  | up |
| ASMM9PARTA038869     | Ces2a         | 0.002418158 | 2.2267132 | up |
| ASMM9PARTA029030     | Serpina3m     | 0.000336    | 46.34972  | up |
| ASMM9PARTA022629     | Sh3d19        | 0.004746981 | 2.4568977 | up |
| ASMM9PARTA022848     | Gm10375       | 0.002467378 | 2.443335  | up |
| ASMM9PARTA031662     | Akr1c13       | 0.006583128 | 3.8930511 | up |
| ASMM9PARTA044004     | Bst2          | 0.00000186  | 9.533976  | up |
| ASMM9PARTA031683     | Apoh          | 0.000127    | 11.041059 | up |
| ASMM9PARTA028957     | Sox11         | 0.000151    | 2.2061996 | up |
| ASMM9PARTA033719     | Apoc3         | 0.000439    | 5.953626  | up |
| ASMM9PARTA031523     | Rax           | 0.0000413   | 3.4520302 | up |

|                      |               |             |             |      |
|----------------------|---------------|-------------|-------------|------|
| ASMM9PARTA037155     | Sgms2         | 0.003885118 | 3.7184405   | up   |
| ASMM9PARTA042973     | Slc9a4        | 0.016005505 | 0.367603676 | down |
| ASMM9PARTA030215     | Hbegf         | 0.000000309 | 0.226434441 | down |
| ASMM9PARTA028532     | Junb          | 0.000186    | 0.467343879 | down |
| ASMM9PARTA021588     | Gm13152       | 0.0000164   | 0.444869542 | down |
| ASMM9PARTA031909     | Zfp238        | 0.03263887  | 0.299774138 | down |
| ASMM9PARTA022401     | Crygc         | 0.000253    | 0.235101058 | down |
| ASMM9PARTA021442     | Gm13051       | 0.00000567  | 0.170937234 | down |
| ASMM9PARTA032642     | Scn9a         | 0.0000245   | 0.459402002 | down |
| ASMM9PARTA023435     | Gm7168        | 0.013747676 | 0.453811723 | down |
| ASMM9PARTA028618     | Ngp           | 0.004853929 | 0.480417233 | down |
| ASMM9PARTA029903     | Dgcr6         | 0.006847616 | 0.459636662 | down |
| ASMM9PARTA039711     | Mpp4          | 0.0000123   | 0.076737107 | down |
| ASMM9PARTA024338     | Zfand2b       | 0.046620134 | 0.476965022 | down |
| ASMM9PARTA028955     | Sstr2         | 0.0000753   | 0.496898163 | down |
| ASMM9PARTA040295     | Olfr1466      | 0.001250902 | 0.36796149  | down |
| ASMM9PARTA037705     | Tnfrsf25      | 0.000159    | 0.379046722 | down |
| ASMM9PARTA024109     | Mup13         | 0.0000816   | 0.314225688 | down |
| ASMM9PARTA043059     | Mkx           | 0.002725761 | 0.283742535 | down |
| ASMM9PARTA031321     | Slc30a3       | 2.98E-08    | 0.473645264 | down |
| ASMM9PARTA024643     | Islr2         | 0.03289369  | 0.419841632 | down |
| ASMM9PARTA037509     | Brd8          | 0.0000734   | 0.393042982 | down |
| ASMM9PARTA035300     | Hddc3         | 0.000000395 | 0.328512468 | down |
| ASMM9PARTA031499     | Eif2s3y       | 0.0000789   | 0.479982383 | down |
| ASMM9PARTA043821     | Tmem72        | 0.0000605   | 0.418247643 | down |
| ASMM9PARTA023907     | Mup19         | 0.000264    | 0.392114345 | down |
| ASMM9PARTA034527     | Sostdc1       | 0.0000476   | 0.326821171 | down |
| ASMM9PARTA024076     | Mup8          | 0.002036876 | 0.483978614 | down |
| ASMM9PARTA044023     | E030010A14Rik | 0.000308    | 0.381288612 | down |
| ASMM9PARTA026601     | Dlc1          | 0.000217    | 0.464019617 | down |
| ASMM9PARTA030353     | Klk1b1        | 0.0000183   | 0.181659906 | down |
| ASMM9PARTA043955     | D630045J12Rik | 0.000242    | 0.48816126  | down |
| ASMM9PARTA041431     | Slc24a2       | 0.002699476 | 0.426236638 | down |
| ASMM9PARTA025882     | 6030458C11Rik | 0.000281    | 0.282420217 | down |
| ASMM9PARTA027332     | Cap1          | 0.0000264   | 0.292745206 | down |
| CUST 249 PI426409190 | Gm3286        | 0.0000429   | 0.441805882 | down |
| ASMM9PARTA042455     | Gimap5        | 0.000491    | 0.373249743 | down |
| ASMM9PARTA027962     | Gjb3          | 0.000251    | 0.402663458 | down |
| ASMM9PARTA028840     | Revrn         | 0.004386    | 0.491746841 | down |
| ASMM9PARTA034614     | Dnase1l2      | 0.000748    | 0.495306329 | down |
| ASMM9PARTA036237     | Ubiad1        | 0.000531    | 0.236124125 | down |
| ASMM9PARTA043880     | 4932414N04Rik | 0.003104006 | 0.410123068 | down |
| ASMM9PARTA029727     | Cd19          | 0.021617334 | 0.437583141 | down |
| ASMM9PARTA039910     | Oit1          | 0.008046963 | 0.488589672 | down |
| ASMM9PARTA032497     | Fabp1         | 0.016139716 | 0.311071598 | down |
| ASMM9PARTA042775     | Myh8          | 0.00491546  | 0.305742209 | down |
| ASMM9PARTA032377     | Cldn2         | 0.023225222 | 0.491812405 | down |
| ASMM9PARTA032653     | Adar          | 0.023826703 | 0.472710338 | down |
| ASMM9PARTA034985     | Kcnv1         | 0.0000476   | 0.495992431 | down |
| ASMM9PARTA029910     | Epm2a         | 1.98E-08    | 0.051198676 | down |
| ASMM9PARTA025621     | BC005561      | 0.0000302   | 0.167559536 | down |
| ASMM9PARTA034488     | Cntnap2       | 0.00000822  | 0.249473548 | down |
| ASMM9PARTA029152     | Ywhae         | 0.000000343 | 0.342773158 | down |
| ASMM9PARTA021788     | Thg1l         | 0.000064    | 0.230841719 | down |
| ASMM9PARTA030429     | Kif1l         | 0.0222601   | 0.488956263 | down |
| ASMM9PARTA020683     | Igsf9b        | 0.004473134 | 0.441796239 | down |
| ASMM9PARTA028385     | Hsd3b5        | 0.00000115  | 0.097729194 | down |



|                      |               |             |             |      |
|----------------------|---------------|-------------|-------------|------|
| ASMM9PARTA031795     | Odf2          | 0.000318    | 0.499939207 | down |
| ASMM9PARTA030160     | Fgf5          | 0.021406036 | 0.485728802 | down |
| ASMM9PARTA024583     | Rgs17         | 0.0000062   | 0.37330538  | down |
| ASMM9PARTA032422     | Insm1         | 0.0000495   | 0.490687849 | down |
| ASMM9PARTA027570     | Cxcr5         | 0.000485    | 0.390621735 | down |
| ASMM9PARTA028678     | Nppa          | 0.0000614   | 0.283605742 | down |
| ASMM9PARTA025197     | Kalrn         | 0.00000261  | 0.481357922 | down |
| ASMM9PARTA029830     | Chi3l3        | 0.000235    | 0.46868177  | down |
| ASMM9PARTA032293     | Lmna          | 0.000409    | 0.37848065  | down |
| ASMM9PARTA023834     | Rergl         | 0.002326847 | 0.354727543 | down |
| ASMM9PARTA026754     | Fau           | 0.000019    | 0.154699763 | down |
| ASMM9PARTA027239     | Slc29a1       | 0.0000173   | 0.483106374 | down |
| ASMM9PARTA033099     | Stap1         | 0.012436161 | 0.478582019 | down |
| ASMM9PARTA025592     | Gm14548       | 0.021181205 | 0.482440679 | down |
| ASMM9PARTA024525     | Rdh7          | 0.02523876  | 0.414652767 | down |
| ASMM9PARTA030236     | Fos           | 0.000172    | 0.48102614  | down |
| ASMM9PARTA028736     | Sl00a9        | 0.0000106   | 0.499931584 | down |
| ASMM9PARTA038804     | Kcne2         | 0.0000321   | 0.458549278 | down |
| ASMM9PARTA032566     | Ptpcrap       | 0.005428916 | 0.493290947 | down |
| ASMM9PARTA030315     | Slc6a4        | 0.0000447   | 0.441296704 | down |
| CUST 250 PI426409190 | Gm3286        | 0.0000155   | 0.443938611 | down |
| ASMM9PARTA029273     | Tcl1          | 0.000000127 | 0.014135804 | down |
| ASMM9PARTA031964     | Tmod4         | 0.015848607 | 0.321909443 | down |
| ASMM9PARTA029742     | Egfbp2        | 0.00000951  | 0.23347499  | down |
| ASMM9PARTA044396     | Cd300lh       | 0.0000408   | 0.236074051 | down |
| ASMM9PARTA026589     | Zfp513        | 0.000401    | 0.404291032 | down |
| ASMM9PARTA027890     | Hes3          | 0.017761111 | 0.377102801 | down |
| ASMM9PARTA032708     | Rgs17         | 0.0000234   | 0.489698938 | down |
| ASMM9PARTA032273     | Crlf2         | 0.000473    | 0.441060355 | down |
| ASMM9PARTA024544     | Fam150b       | 0.002158269 | 0.445263809 | down |
| ASMM9PARTA040613     | Olf435        | 0.000117    | 0.364702302 | down |
| ASMM9PARTA039527     | Trib1         | 0.00014     | 0.461173141 | down |
| ASMM9PARTA029147     | Ttk           | 0.002395154 | 0.47989612  | down |
| ASMM9PARTA027936     | Inadl         | 0.0296823   | 0.450680683 | down |
| ASMM9PARTA036550     | 2410076121Rik | 0.000267    | 0.319978661 | down |
| ASMM9PARTA036691     | Als2          | 0.000777    | 0.4082203   | down |
| ASMM9PARTA020269     | Olf1329       | 0.032082494 | 0.475689371 | down |
| ASMM9PARTA025418     | 2210021J22Rik | 0.000468    | 0.496336491 | down |
| ASMM9PARTA028048     | Fosb          | 0.0000213   | 0.454175405 | down |
| ASMM9PARTA030020     | Nr6a1         | 0.000109    | 0.429017656 | down |
| ASMM9PARTA042802     | C730048C13Rik | 0.00000496  | 0.183598453 | down |
| ASMM9PARTA036292     | Pan3          | 0.0000142   | 0.256213944 | down |
| ASMM9PARTA030649     | Notch4        | 0.001635765 | 0.487849998 | down |
| ASMM9PARTA029325     | Adam17        | 0.003874467 | 0.432732585 | down |
| ASMM9PARTA039758     | Spon1         | 0.0000426   | 0.386575292 | down |
| ASMM9PARTA038655     | Ugt2b38       | 0.000769    | 0.345928031 | down |
| ASMM9PARTA023296     | Gm3448        | 0.0000154   | 0.260556994 | down |
| ASMM9PARTA041022     | Homer1        | 0.0000625   | 0.143984859 | down |
| ASMM9PARTA024985     | Col4a5        | 0.0000103   | 0.474040522 | down |
| ASMM9PARTA044796     | Cebpe         | 0.005017891 | 0.475794819 | down |
| ASMM9PARTA034873     | Ceacam12      | 0.002435127 | 0.30555981  | down |
| ASMM9PARTA042225     | Ltbp4         | 0.0002      | 0.491334433 | down |
| ASMM9PARTA043957     | Wbscr28       | 0.000149    | 0.461222361 | down |
| ASMM9PARTA025787     | Vmn1r176      | 0.007232964 | 0.478677892 | down |
| ASMM9PARTA028780     | Syt1          | 0.00000467  | 0.293032307 | down |
| ASMM9PARTA029622     | Clca1         | 0.009162277 | 0.486049646 | down |
| ASMM9PARTA031272     | Sfl           | 0.038174484 | 0.43577859  | down |

|                  |               |             |             |      |
|------------------|---------------|-------------|-------------|------|
| ASMM9PARTA031437 | Polk          | 0.000238    | 0.353910792 | down |
| ASMM9PARTA022650 | Slc2a9        | 0.003816413 | 0.320703392 | down |
| ASMM9PARTA038489 | Celsr3        | 0.010112805 | 0.407052544 | down |
| ASMM9PARTA039985 | Zfp418        | 0.04104932  | 0.43289706  | down |
| ASMM9PARTA032737 | Acpp          | 0.02064879  | 0.419578894 | down |
| ASMM9PARTA042570 | Mylk3         | 0.018191954 | 0.483113049 | down |
| ASMM9PARTA020931 | Mageb4        | 0.026329242 | 0.48557573  | down |
| ASMM9PARTA042028 | Kcns3         | 0.04523851  | 0.226949448 | down |
| ASMM9PARTA026146 | Slc10a1       | 0.00000856  | 0.098413815 | down |
| ASMM9PARTA024003 | Psen2         | 0.011228817 | 0.455768779 | down |
| ASMM9PARTA026587 | Gm13138       | 0.0000857   | 0.461782958 | down |
| ASMM9PARTA044243 | Paqr3         | 0.013341891 | 0.412755448 | down |
| ASMM9PARTA044201 | Gadd45gip1    | 0.0000119   | 0.262386361 | down |
| ASMM9PARTA025601 | Mup11         | 0.000000199 | 0.284587279 | down |
| ASMM9PARTA028079 | Ltf           | 0.0000171   | 0.454283209 | down |
| ASMM9PARTA040144 | Olfr1457      | 0.001572979 | 0.347708616 | down |
| ASMM9PARTA040843 | Olfr978       | 0.000736    | 0.431760399 | down |
| ASMM9PARTA037030 | 4930511M11Rik | 0.013188097 | 0.388463564 | down |
| ASMM9PARTA035535 | Srpx2         | 0.02585578  | 0.430954162 | down |
| ASMM9PARTA028641 | Mc3r          | 0.009461132 | 0.294415526 | down |
| ASMM9PARTA043423 | Pacsin1       | 0.00000492  | 0.422701559 | down |
| ASMM9PARTA038744 | Fam64a        | 0.000263    | 0.443228403 | down |
| ASMM9PARTA042825 | Xylt1         | 0.035959613 | 0.468453542 | down |
| ASMM9PARTA040381 | Olfr727       | 0.00471029  | 0.342129833 | down |
| ASMM9PARTA041786 | Iqub          | 0.001261203 | 0.487423546 | down |
| ASMM9PARTA020324 | Skap1         | 0.000167    | 0.219821189 | down |
| ASMM9PARTA031037 | Try4          | 0.008049136 | 0.298372313 | down |
| ASMM9PARTA028410 | Pdha2         | 0.038102333 | 0.494383727 | down |
| ASMM9PARTA021996 | Gucy2g        | 0.005902305 | 0.46511563  | down |
| ASMM9PARTA025940 | D330028D13Rik | 0.00017     | 0.170914832 | down |
| ASMM9PARTA034749 | Nkapl         | 0.000238    | 0.349011183 | down |
| ASMM9PARTA021674 | Bdnf          | 0.0000212   | 0.466203792 | down |
| ASMM9PARTA025525 | Nfatc1        | 0.011591441 | 0.402988823 | down |
| ASMM9PARTA038893 | Defb9         | 0.0000361   | 0.278837165 | down |
| ASMM9PARTA019833 | Try5          | 0.017210985 | 0.193596037 | down |
| ASMM9PARTA026103 | Myt1          | 0.004039791 | 0.329951441 | down |
| ASMM9PARTA043662 | Vmac          | 0.00845134  | 0.330779036 | down |
| ASMM9PARTA025894 | Vmn1r113      | 0.0000115   | 0.442193033 | down |
| ASMM9PARTA023570 | Pde7a         | 0.002749907 | 0.477669112 | down |
| ASMM9PARTA025548 | Dpy19l2       | 0.007144816 | 0.476049973 | down |
| ASMM9PARTA024893 | Med16         | 0.048209075 | 0.490917342 | down |
| ASMM9PARTA027918 | Egr1          | 0.00000122  | 0.392822088 | down |
| ASMM9PARTA030528 | Ids           | 0.018273843 | 0.485688343 | down |
| ASMM9PARTA020329 | Olfr406-ps    | 0.024377141 | 0.4317105   | down |
| ASMM9PARTA031308 | Clec3b        | 0.0000546   | 0.35358776  | down |
| ASMM9PARTA031634 | Dusp1         | 0.000067    | 0.373300196 | down |
| ASMM9PARTA021408 | Trpm3         | 0.00000332  | 0.431228591 | down |
| ASMM9PARTA035988 | Dhx34         | 0.008895337 | 0.425384207 | down |
| ASMM9PARTA026879 | Amh           | 0.010493986 | 0.408379123 | down |
| ASMM9PARTA040559 | Olfr641       | 0.002854717 | 0.37871337  | down |
| ASMM9PARTA033543 | Folr4         | 0.000437    | 0.309975665 | down |
| ASMM9PARTA039337 | Tmem189       | 0.0185322   | 0.494481341 | down |
| ASMM9PARTA024663 | Fgd2          | 0.002699563 | 0.414719799 | down |
| ASMM9PARTA043314 | Spata21       | 0.03825752  | 0.371856419 | down |
| ASMM9PARTA025271 | Barhl1        | 0.035410836 | 0.333145561 | down |
| ASMM9PARTA040239 | Olfr164       | 0.03436939  | 0.405984834 | down |
| ASMM9PARTA030500 | Klk1b11       | 0.000000274 | 0.074594361 | down |

|                  |               |             |             |      |
|------------------|---------------|-------------|-------------|------|
| ASMM9PARTA041741 | Tph2          | 0.0000878   | 0.204844511 | down |
| ASMM9PARTA027245 | Mup12         | 0.000829    | 0.414763817 | down |
| ASMM9PARTA034590 | Fam187a       | 0.0000235   | 0.213284284 | down |
| ASMM9PARTA028286 | Ltb           | 0.006315122 | 0.404416667 | down |
| ASMM9PARTA043625 | Sik2          | 0.009175265 | 0.414264039 | down |
| ASMM9PARTA025080 | Sgsm1         | 0.0000272   | 0.257968053 | down |
| ASMM9PARTA032326 | Arc           | 0.00000108  | 0.179377345 | down |
| ASMM9PARTA029274 | Thrb          | 0.021862203 | 0.205487942 | down |
| ASMM9PARTA023546 | Serac1        | 0.008477282 | 0.244295994 | down |
| ASMM9PARTA038106 | Pth2          | 0.000109    | 0.415717134 | down |
| ASMM9PARTA025385 | 2210021J22Rik | 0.00000228  | 0.402087445 | down |
| ASMM9PARTA033122 | Spib          | 0.000379    | 0.208397198 | down |
| ASMM9PARTA035171 | Dusp6         | 0.012823841 | 0.497708798 | down |
| ASMM9PARTA040340 | Olfr1238      | 0.011584684 | 0.306861487 | down |
| ASMM9PARTA033706 | Rsc1a1        | 0.01768161  | 0.220316014 | down |
| ASMM9PARTA031047 | Rhag          | 0.00011     | 0.261335083 | down |
| ASMM9PARTA023099 | Gas7          | 0.00189725  | 0.3737123   | down |
| ASMM9PARTA041362 | Pus7l         | 0.014184736 | 0.370009529 | down |
| ASMM9PARTA034470 | Sys1          | 0.0000285   | 0.458461129 | down |
| ASMM9PARTA030919 | Tdgfl         | 0.046951074 | 0.346677373 | down |
| ASMM9PARTA033257 | Doc2g         | 0.000000408 | 0.491823121 | down |
| ASMM9PARTA026741 | Mrpl15        | 0.000169    | 0.395209695 | down |
| ASMM9PARTA031999 | Bhmt          | 0.00000935  | 0.135460032 | down |
| ASMM9PARTA041276 | Pxt1          | 0.004590172 | 0.381893993 | down |
| ASMM9PARTA023691 | Gm13125       | 0.001326092 | 0.141887921 | down |
| ASMM9PARTA023419 | Ccnblip1      | 0.000232    | 0.229183755 | down |
| ASMM9PARTA024843 | Lmo4          | 0.000125    | 0.375995203 | down |
| ASMM9PARTA039186 | Tnpo2         | 0.00000107  | 0.459237125 | down |
| ASMM9PARTA036903 | Unkl          | 0.00415621  | 0.404864856 | down |
| ASMM9PARTA041459 | Lrrc56        | 0.000676    | 0.425549498 | down |
| ASMM9PARTA030085 | Erf           | 0.012908177 | 0.45431231  | down |
| ASMM9PARTA039317 | Gdap1l1       | 0.000166    | 0.386096451 | down |
| ASMM9PARTA042712 | 6530418L21Rik | 0.0000627   | 0.433467243 | down |
| ASMM9PARTA019871 | Dnmt3b        | 0.000064    | 0.338452335 | down |
| ASMM9PARTA029990 | Gem           | 0.000446    | 0.429752413 | down |
| ASMM9PARTA038627 | Hoxb2         | 0.00000523  | 0.441047788 | down |
| ASMM9PARTA024138 | Mup7          | 0.00000108  | 0.279095473 | down |
| ASMM9PARTA027201 | Commd7        | 0.000222    | 0.469340122 | down |
| ASMM9PARTA020035 | Gm5409        | 0.0000329   | 0.467364891 | down |
| ASMM9PARTA044724 | Olfr741       | 0.041489735 | 0.385973775 | down |
| ASMM9PARTA034885 | 4930549C01Rik | 0.000619    | 0.469983405 | down |
| ASMM9PARTA021365 | Wfdc15b       | 0.000105    | 0.48202307  | down |
| ASMM9PARTA028663 | Prg2          | 0.00000119  | 0.175515555 | down |
| ASMM9PARTA023422 | Arhgef16      | 0.000000411 | 0.465175432 | down |
| ASMM9PARTA041481 | Zswim4        | 0.0000192   | 0.147287001 | down |
| ASMM9PARTA039572 | Rod1          | 0.037881777 | 0.476646354 | down |
| ASMM9PARTA038608 | Oosp1         | 0.002457429 | 0.36532236  | down |
| ASMM9PARTA026893 | Vit           | 0.000125    | 0.338283687 | down |
| ASMM9PARTA029549 | Aspm          | 0.04410372  | 0.440597733 | down |
| ASMM9PARTA031815 | Nr4a3         | 0.004178593 | 0.497477095 | down |
| ASMM9PARTA030228 | Kap           | 0.0000254   | 0.071096444 | down |
| ASMM9PARTA026040 | Ipcefl        | 0.0000152   | 0.149747754 | down |
| ASMM9PARTA044308 | Mrvi1         | 0.018769069 | 0.472869268 | down |
| ASMM9PARTA023537 | Catsper4      | 0.003176924 | 0.367400657 | down |
| ASMM9PARTA032990 | Git2          | 0.0000183   | 0.47472038  | down |
| ASMM9PARTA027144 | Mup17         | 0.000000146 | 0.302127345 | down |
| ASMM9PARTA031089 | Sema6c        | 0.003034416 | 0.49963609  | down |

|                  |               |             |             |      |
|------------------|---------------|-------------|-------------|------|
| ASMM9PARTA030958 | Sorl1         | 0.00000452  | 0.149844162 | down |
| ASMM9PARTA040880 | Hrh4          | 0.004948984 | 0.360725102 | down |
| ASMM9PARTA032874 | Rbck1         | 0.001522778 | 0.352511523 | down |
| ASMM9PARTA026257 | Zfp647        | 0.022127716 | 0.417488493 | down |
| ASMM9PARTA037033 | Ccdc83        | 0.000321    | 0.338653868 | down |
| ASMM9PARTA027080 | Fbxl13        | 0.005876007 | 0.424467135 | down |
| ASMM9PARTA032314 | Rbm3          | 0.0000873   | 0.452523538 | down |
| ASMM9PARTA035348 | Iqcf3         | 0.001044892 | 0.324744839 | down |
| ASMM9PARTA044389 | Gse1          | 0.000585    | 0.318707435 | down |
| ASMM9PARTA025799 | Tmem40        | 0.000179    | 0.370807374 | down |
| ASMM9PARTA044572 | Unc93a        | 0.001949501 | 0.377923622 | down |
| ASMM9PARTA043728 | Me3           | 0.00000423  | 0.437925888 | down |
| ASMM9PARTA022806 | Gm13078       | 0.021160778 | 0.41041406  | down |
| ASMM9PARTA023527 | Corin         | 0.0000377   | 0.465840867 | down |
| ASMM9PARTA020610 | Ccdc27        | 0.004097562 | 0.443864796 | down |
| ASMM9PARTA028405 | Notch3        | 0.000204    | 0.366340261 | down |
| ASMM9PARTA041052 | Slc6a5        | 0.003714943 | 0.440113629 | down |
| ASMM9PARTA022340 | Phf21b        | 0.001635738 | 0.498560829 | down |
| ASMM9PARTA026633 | Pde4b         | 0.011835448 | 0.480360093 | down |
| ASMM9PARTA025774 | Eomes         | 0.013837613 | 0.361407465 | down |
| ASMM9PARTA039051 | Vmn1r8        | 0.021540051 | 0.413593837 | down |
| ASMM9PARTA020811 | Gm106         | 0.042625967 | 0.498456778 | down |
| ASMM9PARTA023899 | Oxr1          | 0.000241    | 0.322562103 | down |
| ASMM9PARTA042054 | Lpin1         | 0.02393558  | 0.473953753 | down |
| ASMM9PARTA030994 | Sykb          | 0.000127    | 0.270543885 | down |
| ASMM9PARTA042717 | Zfp747        | 0.000524    | 0.277571858 | down |
| ASMM9PARTA036460 | Zswim1        | 0.0000392   | 0.402493528 | down |
| ASMM9PARTA021232 | BC048644      | 0.014547979 | 0.369697658 | down |
| ASMM9PARTA025760 | Vmn1r117      | 0.000000968 | 0.434305307 | down |
| ASMM9PARTA020142 | Gm13154       | 0.00000223  | 0.371131561 | down |
| ASMM9PARTA037075 | 5730419I09Rik | 0.000172    | 0.479790919 | down |
| ASMM9PARTA031954 | Neu2          | 0.000487    | 0.428661876 | down |
| ASMM9PARTA041560 | Otop2         | 0.002250629 | 0.353663616 | down |
| ASMM9PARTA032151 | Igfbpl1       | 0.000809    | 0.44158443  | down |
| ASMM9PARTA040861 | Olf30         | 0.0000707   | 0.418869624 | down |
| ASMM9PARTA036161 | Slc22a16      | 0.000857    | 0.334293234 | down |
| ASMM9PARTA023305 | Slc14a2       | 0.02637166  | 0.464379104 | down |
| ASMM9PARTA019794 | Zfp457        | 0.00017     | 0.217704799 | down |
| ASMM9PARTA034514 | 4921530L21Rik | 0.00700462  | 0.365511905 | down |
| ASMM9PARTA029071 | Tgm3          | 0.0000328   | 0.220615436 | down |
| ASMM9PARTA021928 | Cyp2b23       | 0.000348    | 0.392665526 | down |
| ASMM9PARTA025900 | Gpr19         | 0.000876    | 0.348488202 | down |
| ASMM9PARTA042103 | Klf8          | 0.004883245 | 0.404240074 | down |
| ASMM9PARTA036795 | Kif2b         | 0.000251    | 0.269359181 | down |
| ASMM9PARTA040864 | Olf796        | 0.021858174 | 0.473780198 | down |
| ASMM9PARTA040808 | Leap2         | 0.000139    | 0.389914609 | down |
| ASMM9PARTA024528 | Sidtl         | 0.0000415   | 0.428355452 | down |
| ASMM9PARTA037637 | Ccdc116       | 0.01454149  | 0.491639184 | down |
| ASMM9PARTA021137 | Placl1        | 0.000275    | 0.301403328 | down |
| ASMM9PARTA041201 | Rbm45         | 0.00000697  | 0.117660015 | down |
| ASMM9PARTA020852 | Tmem2         | 0.004486588 | 0.483824372 | down |
| ASMM9PARTA026534 | Cuedc1        | 0.000845    | 0.26893848  | down |
| ASMM9PARTA039721 | Hkdc1         | 0.00000898  | 0.44028638  | down |
| ASMM9PARTA020245 | Ear12         | 0.000311    | 0.225203603 | down |
| ASMM9PARTA025956 | Pate-n        | 0.0000115   | 0.205355183 | down |
| ASMM9PARTA040779 | Zc3h12a       | 0.0000387   | 0.346283769 | down |
| ASMM9PARTA027022 | Ins2          | 0.014031069 | 0.477579756 | down |

|                  |               |             |             |      |
|------------------|---------------|-------------|-------------|------|
| ASMM9PARTA038186 | Cacng6        | 0.008964797 | 0.366543547 | down |
| ASMM9PARTA037382 | Pbp2          | 0.00630391  | 0.454935127 | down |
| ASMM9PARTA041393 | Ccnb1         | 0.000488    | 0.408993606 | down |
| ASMM9PARTA044638 | Dgkq          | 0.002215023 | 0.342088999 | down |
| ASMM9PARTA043264 | Prss35        | 0.00000017  | 0.406529977 | down |
| ASMM9PARTA033400 | Efemp2        | 0.009318534 | 0.458939298 | down |
| ASMM9PARTA021964 | Chrna9        | 0.04733354  | 0.438333395 | down |
| ASMM9PARTA033165 | Aurkc         | 0.036170002 | 0.420278682 | down |
| ASMM9PARTA031139 | Xlr3c         | 0.0000111   | 0.429040351 | down |
| ASMM9PARTA029459 | Uty           | 0.0000289   | 0.474480043 | down |
| ASMM9PARTA036056 | Ankrd33b      | 0.036068376 | 0.278879935 | down |
| ASMM9PARTA021256 | Tas2r122      | 0.00017     | 0.377055878 | down |
| ASMM9PARTA033269 | Klk1b27       | 0.000119    | 0.38153231  | down |
| ASMM9PARTA039707 | D19Wsu162e    | 0.016259165 | 0.480898796 | down |
| ASMM9PARTA030295 | Klk1          | 0.00000383  | 0.309312286 | down |
| ASMM9PARTA027266 | Cd79a         | 0.028763643 | 0.25046783  | down |
| ASMM9PARTA033414 | Retnla        | 0.0000285   | 0.147527338 | down |
| ASMM9PARTA024275 | Pax4          | 0.002149344 | 0.451847473 | down |
| ASMM9PARTA030247 | H2-Ea-ps      | 0.00000373  | 0.180102989 | down |
| ASMM9PARTA037378 | 4930588N13Rik | 0.009200743 | 0.471459115 | down |
| ASMM9PARTA022755 | Dab2          | 0.000215    | 0.319370824 | down |
| ASMM9PARTA038317 | 2310034C09Rik | 0.02548631  | 0.456629845 | down |
| ASMM9PARTA025240 | Zfp605        | 0.000196    | 0.060955598 | down |
| ASMM9PARTA040940 | Olfr520       | 0.010135816 | 0.32534108  | down |
| ASMM9PARTA032061 | Casp9         | 0.0000204   | 0.1676868   | down |
| ASMM9PARTA022266 | D430042O09Rik | 0.00000298  | 0.461460503 | down |
| ASMM9PARTA028071 | Il12rb1       | 0.000154    | 0.47967136  | down |
| ASMM9PARTA022667 | Gm595         | 0.039595358 | 0.302110304 | down |
| ASMM9PARTA025578 | Ucma          | 0.002863975 | 0.476993415 | down |
| ASMM9PARTA025137 | Telo2         | 0.03299269  | 0.452947025 | down |
| ASMM9PARTA022728 | Kif19a        | 0.012253807 | 0.475640025 | down |
| ASMM9PARTA042724 | Fam100b       | 0.00000504  | 0.396488775 | down |
| ASMM9PARTA034950 | Tmem35        | 0.037913263 | 0.393186827 | down |
| ASMM9PARTA027104 | Aatk          | 0.0000275   | 0.452087332 | down |
| ASMM9PARTA033308 | Egr4          | 0.00000177  | 0.285297946 | down |
| ASMM9PARTA041571 | Mtrr          | 0.03828319  | 0.440571818 | down |
| ASMM9PARTA031895 | Dkk1          | 0.000023    | 0.483600619 | down |
| ASMM9PARTA025598 | Plekha8       | 0.0000181   | 0.494882862 | down |
| ASMM9PARTA023494 | Wtap          | 4.04E-09    | 0.031462811 | down |
| ASMM9PARTA040967 | BC031353      | 0.002297535 | 0.40781426  | down |
| ASMM9PARTA022055 | Btdb16        | 0.001195442 | 0.495289647 | down |
| ASMM9PARTA027168 | Pld5          | 0.042666536 | 0.484051706 | down |
| ASMM9PARTA044159 | Zfp516        | 0.00000884  | 0.489752948 | down |
| ASMM9PARTA041630 | Ppwd1         | 0.0000512   | 0.285697299 | down |
| ASMM9PARTA042640 | Mael          | 0.0000521   | 0.366272688 | down |
| ASMM9PARTA027349 | LOC100048884  | 0.0000231   | 0.248135424 | down |
| ASMM9PARTA037449 | Sucnr1        | 0.029970655 | 0.485580045 | down |
| ASMM9PARTA031728 | S100a8        | 0.001085106 | 0.487720538 | down |
| ASMM9PARTA037057 | Fam164b       | 0.024428518 | 0.444966974 | down |
| ASMM9PARTA044875 | Rxfp1         | 0.004049994 | 0.425257181 | down |
| ASMM9PARTA028264 | Pcnt          | 0.042218003 | 0.496031746 | down |
| ASMM9PARTA027595 | Foxd4         | 0.000676    | 0.221990168 | down |
| ASMM9PARTA029861 | Nr4a1         | 0.0000345   | 0.2396998   | down |
| ASMM9PARTA035817 | Wdr96         | 0.04961447  | 0.457189945 | down |
| ASMM9PARTA029595 | Fgf8          | 0.003596607 | 0.428435302 | down |
| ASMM9PARTA039413 | Cdca7l        | 0.010998045 | 0.247353381 | down |
| ASMM9PARTA039430 | Tbx22         | 0.003016145 | 0.480964623 | down |

|                  |               |             |             |      |
|------------------|---------------|-------------|-------------|------|
| ASMM9PARTA038183 | Nxph3         | 0.002594362 | 0.497930105 | down |
| ASMM9PARTA030053 | Fcnb          | 0.049639612 | 0.45100775  | down |
| ASMM9PARTA021821 | Med1          | 0.000000712 | 0.043025313 | down |
| ASMM9PARTA030909 | S100a5        | 0.00000941  | 0.007860551 | down |
| ASMM9PARTA023536 | Dlgap1        | 0.010963332 | 0.487633326 | down |
| ASMM9PARTA039649 | Uts2r         | 0.000000867 | 0.197836989 | down |
| ASMM9PARTA040512 | Olfr143       | 0.029612243 | 0.498301986 | down |
| ASMM9PARTA026827 | Pde4b         | 0.006547238 | 0.488341196 | down |
| ASMM9PARTA038735 | Calml4        | 0.000198    | 0.439853508 | down |
| ASMM9PARTA021440 | Baiap2        | 0.00000323  | 0.43205148  | down |
| ASMM9PARTA022090 | Olfr367-ps    | 0.005624322 | 0.424954591 | down |
| ASMM9PARTA033372 | Gprc5b        | 0.000881    | 0.416962728 | down |
| ASMM9PARTA021303 | Gm904         | 0.04626398  | 0.342016915 | down |
| ASMM9PARTA037993 | Pcdhb16       | 0.0000428   | 0.462512934 | down |
| ASMM9PARTA026985 | Aqp1          | 0.0000856   | 0.449955904 | down |
| ASMM9PARTA032496 | Ear7          | 0.0000289   | 0.125511963 | down |
| ASMM9PARTA037782 | Supt16h       | 0.000536    | 0.371455047 | down |
| ASMM9PARTA034987 | 1700019N19Rik | 0.009215388 | 0.449747993 | down |
| ASMM9PARTA028172 | Klk1b5        | 0.000153    | 0.340378951 | down |
| ASMM9PARTA042880 | Tmem164       | 0.0000915   | 0.450962659 | down |
| ASMM9PARTA027690 | Ear2          | 0.00000814  | 0.242600267 | down |
| ASMM9PARTA043966 | Gmeb2         | 0.001528723 | 0.190544024 | down |
| ASMM9PARTA028365 | Lmo2          | 0.00000178  | 0.445117224 | down |
| ASMM9PARTA037765 | Mesdc1        | 0.00000719  | 0.136068097 | down |
| ASMM9PARTA021314 | Timm8a2       | 0.007666159 | 0.42203529  | down |
| ASMM9PARTA029477 | Camk4         | 0.0000144   | 0.456399786 | down |
| ASMM9PARTA029767 | Cxcr2         | 0.003962452 | 0.34452615  | down |
| ASMM9PARTA027972 | Gzmk          | 0.00022     | 0.299988294 | down |
| ASMM9PARTA030501 | Klk1b26       | 0.0000274   | 0.184984956 | down |
| ASMM9PARTA028309 | Hlx           | 0.015858162 | 0.423731022 | down |
| ASMM9PARTA043294 | 3110035E14Rik | 0.0000108   | 0.462555101 | down |
| ASMM9PARTA044092 | Zfp811        | 0.0000987   | 0.435961258 | down |
| ASMM9PARTA020865 | ORF19         | 0.000103    | 0.372990769 | down |
| ASMM9PARTA037340 | Spaca3        | 0.011417726 | 0.406437812 | down |
| ASMM9PARTA024447 | Islr2         | 0.0000502   | 0.468932297 | down |
| ASMM9PARTA042117 | Psemb11       | 0.020527583 | 0.470610382 | down |
| ASMM9PARTA044266 | Scd4          | 0.017677516 | 0.476565011 | down |
| ASMM9PARTA031022 | Kdm5d         | 0.00000987  | 0.481560959 | down |
| ASMM9PARTA027456 | Speg          | 0.000304    | 0.482471753 | down |
| ASMM9PARTA028098 | Cd79b         | 0.0000317   | 0.286383088 | down |
| ASMM9PARTA044088 | A530054K11Rik | 0.00000732  | 0.426091364 | down |
| ASMM9PARTA021267 | Lrrc8b        | 0.001054654 | 0.413018662 | down |
| ASMM9PARTA038130 | Ear10         | 0.000000362 | 0.214187479 | down |
| ASMM9PARTA030334 | Sik1          | 0.004887472 | 0.480421872 | down |
| ASMM9PARTA044613 | Btbd6         | 0.0000102   | 0.399599889 | down |
| ASMM9PARTA025714 | Eif5a         | 0.001025027 | 0.413191246 | down |
| ASMM9PARTA032436 | Irx4          | 0.0000528   | 0.49433827  | down |
| ASMM9PARTA027289 | Zfp963        | 0.0000246   | 0.117660195 | down |
| ASMM9PARTA039168 | Defb11        | 0.0000138   | 0.275106668 | down |
| ASMM9PARTA031186 | Prss3         | 0.0000798   | 0.495682998 | down |
| ASMM9PARTA043669 | Retnlg        | 0.000762    | 0.38681429  | down |
| ASMM9PARTA020937 | 7420426K07Rik | 0.028842604 | 0.480785873 | down |
| ASMM9PARTA035463 | Ypel3         | 0.000102    | 0.483375975 | down |
| ASMM9PARTA022526 | Neur11b       | 0.00000667  | 0.455872437 | down |
| ASMM9PARTA023996 | Illrap        | 0.0000404   | 0.491431571 | down |
| ASMM9PARTA027360 | Aldoa         | 0.0000288   | 0.451597508 | down |
| ASMM9PARTA027005 | Slc7a9        | 0.000437    | 0.46457929  | down |

|                  |               |             |             |      |
|------------------|---------------|-------------|-------------|------|
| ASMM9PARTA022081 | Nrp2          | 0.000247    | 0.499287442 | down |
| ASMM9PARTA025273 | Efemp2        | 0.00000317  | 0.448102695 | down |
| ASMM9PARTA041885 | Lpar1         | 0.000134    | 0.255179441 | down |
| ASMM9PARTA042216 | D330045A20Rik | 0.0000219   | 0.48107513  | down |
| ASMM9PARTA027673 | Fosl2         | 0.0000218   | 0.450510965 | down |
| ASMM9PARTA030322 | Klk1b24       | 0.0000703   | 0.271431027 | down |
| ASMM9PARTA040975 | Olfir585      | 0.000681    | 0.455877238 | down |
| ASMM9PARTA038351 | Hsd17b11      | 0.000105    | 0.437128239 | down |
| ASMM9PARTA041331 | BC026439      | 0.006384262 | 0.482822713 | down |
| ASMM9PARTA037597 | Aldh1a3       | 0.001617957 | 0.394004916 | down |
| ASMM9PARTA035120 | Ttc14         | 0.000049    | 0.367692344 | down |
| ASMM9PARTA033718 | Zfp110        | 0.018406352 | 0.476445261 | down |
| ASMM9PARTA025886 | Hmgal         | 0.000188    | 0.489959433 | down |
| ASMM9PARTA034368 | Klhl10        | 0.037427932 | 0.470546694 | down |
| ASMM9PARTA027435 | Cort          | 0.00000844  | 0.468392017 | down |
| ASMM9PARTA041911 | Rspo2         | 0.000119    | 0.493041216 | down |
| ASMM9PARTA041918 | 1110012J17Rik | 0.0000798   | 0.498240787 | down |
| ASMM9PARTA028187 | Ncoa2         | 0.0000767   | 0.408131281 | down |
| ASMM9PARTA022239 | Apobec4       | 0.006100148 | 0.392494963 | down |
| ASMM9PARTA045010 | Mrgprb8       | 0.000346    | 0.349066518 | down |
| ASMM9PARTA036919 | 4930563D23Rik | 0.005648275 | 0.387879931 | down |
| ASMM9PARTA033587 | Syne1         | 0.049603894 | 0.46259368  | down |
| ASMM9PARTA033242 | Ucn           | 0.0000268   | 0.246108926 | down |
| ASMM9PARTA022906 | Apold1        | 0.000084    | 0.382631851 | down |
| ASMM9PARTA033534 | Pvrl3         | 0.02094496  | 0.481103991 | down |
| ASMM9PARTA042913 | Dmrt3         | 0.0000596   | 0.440267751 | down |
| ASMM9PARTA021920 | Fam65c        | 0.005946101 | 0.355848965 | down |
| ASMM9PARTA027446 | Cux2          | 0.00000714  | 0.494651629 | down |
| ASMM9PARTA027162 | Cckbr         | 0.000157    | 0.485405389 | down |
| ASMM9PARTA038507 | Pigt          | 0.0000156   | 0.283801069 | down |
| ASMM9PARTA031550 | Casp8ap2      | 0.0000469   | 0.362896029 | down |
| ASMM9PARTA030791 | Furin         | 0.00000359  | 0.475618715 | down |
| ASMM9PARTA041030 | Cpz           | 0.000136    | 0.43524052  | down |
| ASMM9PARTA043502 | Rnf24         | 0.03757431  | 0.409359983 | down |
| ASMM9PARTA027477 | Cr2           | 0.000399    | 0.122298592 | down |
| ASMM9PARTA037189 | Ston1         | 0.000000392 | 0.071503707 | down |
| ASMM9PARTA030278 | Foxd3         | 0.002113074 | 0.318211833 | down |
| ASMM9PARTA027730 | Mpp3          | 0.0000418   | 0.423920224 | down |
| ASMM9PARTA023550 | BC048609      | 0.017351313 | 0.425830757 | down |
| ASMM9PARTA035223 | 1110059M19Rik | 0.0000611   | 0.449016974 | down |
