# Supplementary material for: Microarray Profile of Long Noncoding RNA and Messenger RNA Expression in a Model of Alzheimer’s Disease
Source: MDPI journal article supplement (doi:10.3390/life10050064), 2020-05-14
Supplement: s1 [file s1]

# Supplementary

## Microarray Profile of Long Noncoding RNA and Messenger RNA Expression in a Model of Alzheimer's Disease

Linlin Wang <sup>†</sup>, Li Zeng <sup>†</sup>, Hailun Jiang, Zhuorong Li <sup>\*</sup> and Rui Liu <sup>\*</sup>

Institute of Medicinal Biotechnology, Chinese Academy of Medical Sciences and Peking Union Medical College, Beijing 100050, China; wanglinlin@wfmc.edu.cn (L.W.); zengsheng@imb.pumc.edu.cn (L.Z.); jianghailun@imb.pumc.edu.cn (H.J.)

<sup>\*</sup> Correspondence: lizhourong@imb.pumc.edu.cn (Z.L.); +86-10-8352017; .liurui@imb.pumc.edu.cn (R.L.); Tel.: +86-10-67087731

**Table S6.** Differently expressed mRNAs in the brain of 3-month-old APP/PS1 mice compared with age-matched WT mice.

| Probe Name       | Symbol    | p-Value     | Fold Change | Regulation |
|------------------|-----------|-------------|-------------|------------|
| ASMM9PARTA034335 | Rexo1     | 0.0000776   | 2.0131881   | up         |
| ASMM9PARTA020859 | Golm1     | 0.000497    | 2.124896    | up         |
| ASMM9PARTA026649 | Gm4858    | 0.035422985 | 2.2425082   | up         |
| ASMM9PARTA025747 | Tshb      | 0.000261    | 7.1079755   | up         |
| ASMM9PARTA033120 | Cbln3     | 0.000000332 | 31.41241    | up         |
| ASMM9PARTA044292 | Zhx2      | 0.004505109 | 3.8538814   | up         |
| ASMM9PARTA039095 | Dbh       | 0.00000468  | 10.825143   | up         |
| ASMM9PARTA030304 | Myos      | 0.014476405 | 2.687255    | up         |
| ASMM9PARTA042374 | Mppl3     | 0.00131254  | 2.577886    | up         |
| ASMM9PARTA028562 | Pten      | 0.001236823 | 2.0602944   | up         |
| ASMM9PARTA027356 | Rapgef4   | 0.000289    | 2.3592978   | up         |
| ASMM9PARTA030055 | Gpd1      | 0.0000947   | 2.3032591   | up         |
| ASMM9PARTA043927 | Synm      | 0.023921505 | 2.5987158   | up         |
| ASMM9PARTA033070 | Mknk2     | 0.020674184 | 2.598206    | up         |
| ASMM9PARTA026869 | Dnmt1     | 0.028534383 | 2.0691738   | up         |
| ASMM9PARTA044461 | Rsl24d1   | 0.00000256  | 3.8246887   | up         |
| ASMM9PARTA044865 | Lpcat4    | 0.0000565   | 2.7018802   | up         |
| ASMM9PARTA025964 | Atp2b4    | 0.00000577  | 2.1404495   | up         |
| ASMM9PARTA021472 | Serpinb6e | 0.019518634 | 2.115108    | up         |
| ASMM9PARTA031219 | Klk7      | 0.03606632  | 2.0841243   | up         |
| ASMM9PARTA022668 | Gm5634    | 0.005937275 | 2.631999    | up         |
| ASMM9PARTA025718 | Cdr1      | 0.000378    | 4.950154    | up         |
| ASMM9PARTA043488 | Slfn8     | 0.01830712  | 2.6219857   | up         |
| ASMM9PARTA022401 | Crygc     | 0.002933367 | 2.2056231   | up         |
| ASMM9PARTA027615 | Cdh15     | 0.026808225 | 2.6264644   | up         |
| ASMM9PARTA034297 | Baiap211  | 0.009151345 | 2.9503748   | up         |
| ASMM9PARTA043897 | Vps39     | 0.002854362 | 2.7100213   | up         |
| ASMM9PARTA020618 | Nxf3      | 0.020358928 | 3.0989316   | up         |
| ASMM9PARTA044055 | Abhd16b   | 0.020655252 | 2.42075     | up         |

|                  |               |             |           |    |
|------------------|---------------|-------------|-----------|----|
| ASMM9PARTA033443 | B4galt1       | 0.009779065 | 2.0191495 | up |
| ASMM9PARTA041340 | Phc3          | 0.011523894 | 3.0563898 | up |
| ASMM9PARTA029291 | S100g         | 0.000883    | 4.2812963 | up |
| ASMM9PARTA026193 | Tmem11        | 0.00292268  | 2.7385876 | up |
| ASMM9PARTA035974 | Dzip3         | 0.000309    | 2.084709  | up |
| ASMM9PARTA029247 | Srpk2         | 0.001399339 | 2.0067003 | up |
| ASMM9PARTA043891 | Nxph4         | 0.000252    | 3.0350542 | up |
| ASMM9PARTA022309 | Tsc22d2       | 0.007475972 | 5.3817773 | up |
| ASMM9PARTA028723 | Pou3f2        | 0.000298    | 2.6886995 | up |
| ASMM9PARTA024120 | Bcl2l15       | 0.000000657 | 9.992126  | up |
| ASMM9PARTA021097 | Trpm3         | 0.010695213 | 3.1141548 | up |
| ASMM9PARTA029691 | Cd44          | 0.005121916 | 2.274645  | up |
| ASMM9PARTA023315 | Gatad2a       | 0.011054924 | 2.5039454 | up |
| ASMM9PARTA031792 | Ar            | 0.016093018 | 3.4225528 | up |
| ASMM9PARTA042087 | Fry           | 0.018274065 | 2.550512  | up |
| ASMM9PARTA039655 | Cald1         | 0.018220231 | 2.2480915 | up |
| ASMM9PARTA035507 | Otop3         | 0.000654    | 2.1003282 | up |
| ASMM9PARTA024171 | Homer3        | 0.0000226   | 2.4348607 | up |
| ASMM9PARTA034391 | 1700011A15Rik | 0.005382269 | 3.5566006 | up |
| ASMM9PARTA027268 | Ceacam10      | 0.000935    | 2.1249924 | up |
| ASMM9PARTA042058 | Mon1b         | 0.04101522  | 2.0168517 | up |
| ASMM9PARTA031518 | Spnb1         | 0.000387    | 3.5507712 | up |
| ASMM9PARTA030135 | Elavl3        | 0.00000108  | 3.0500207 | up |
| ASMM9PARTA044228 | Ece1          | 0.000386    | 3.2694302 | up |
| ASMM9PARTA030907 | Rgs16         | 0.014481483 | 2.2052946 | up |
| ASMM9PARTA023951 | Grm5          | 0.0000307   | 2.764177  | up |
| ASMM9PARTA029461 | Vmn2r42       | 0.024426727 | 2.5667095 | up |
| ASMM9PARTA037234 | Pcdh1         | 0.001407658 | 2.9612257 | up |
| ASMM9PARTA022034 | Upf2          | 0.001445179 | 2.0416608 | up |
| ASMM9PARTA044023 | E030010A14Rik | 0.000089    | 3.3643317 | up |
| ASMM9PARTA028727 | Psen1         | 0.014514961 | 2.0423884 | up |
| ASMM9PARTA027704 | Grid2         | 0.0000396   | 2.4946718 | up |
| ASMM9PARTA038866 | 1110008J03Rik | 0.000974    | 2.5506053 | up |
| ASMM9PARTA019955 | Lrrc52        | 0.000000984 | 2.2423987 | up |
| ASMM9PARTA030353 | Klk1b1        | 0.00000725  | 3.0717392 | up |
| ASMM9PARTA032069 | Gpc3          | 0.000463    | 5.734672  | up |
| ASMM9PARTA023378 | Hmg1l1        | 0.0000139   | 2.006031  | up |
| ASMM9PARTA028078 | Lif           | 0.040207397 | 2.4267874 | up |
| ASMM9PARTA030219 | Hoxc13        | 0.022291115 | 2.220715  | up |
| ASMM9PARTA033439 | Tsga8         | 0.024242368 | 2.0121956 | up |
| ASMM9PARTA033035 | Olfir749      | 0.034461096 | 2.197205  | up |
| ASMM9PARTA033204 | Angptl4       | 0.000976    | 2.0785153 | up |
| ASMM9PARTA027577 | Cdh16         | 0.0000298   | 2.500842  | up |
| ASMM9PARTA031864 | Ltbp2         | 0.003603911 | 2.351251  | up |
| ASMM9PARTA042776 | Gpr123        | 0.0000174   | 2.700068  | up |
| ASMM9PARTA033437 | Il21          | 0.036489565 | 2.444443  | up |
| ASMM9PARTA038785 | Krt25         | 0.00000162  | 7.0936074 | up |
| ASMM9PARTA033390 | Rqcd1         | 0.004415415 | 5.4435105 | up |
| ASMM9PARTA033704 | Sync          | 0.001493227 | 4.5090194 | up |
| ASMM9PARTA031529 | Zfp59         | 0.043619093 | 2.1645434 | up |
| ASMM9PARTA040166 | Olfir122      | 0.001698892 | 2.2567854 | up |
| ASMM9PARTA037334 | Mccc2         | 0.000131    | 3.4796681 | up |
| ASMM9PARTA029737 | Dlx5          | 0.00000128  | 3.2918766 | up |
| ASMM9PARTA030734 | Ccl12         | 0.0000128   | 2.8336325 | up |
| ASMM9PARTA039194 | Vmn1r203      | 0.04366745  | 2.4464188 | up |
| ASMM9PARTA039964 | Olfir284      | 0.013073212 | 2.4551265 | up |
| ASMM9PARTA031288 | Map3k1        | 0.01629606  | 2.120114  | up |

|                  |               |             |           |    |
|------------------|---------------|-------------|-----------|----|
| ASMM9PARTA038671 | D17H6S56E-3   | 0.001084572 | 2.7253125 | up |
| ASMM9PARTA027377 | Cebpd         | 0.0000837   | 2.2806914 | up |
| ASMM9PARTA027016 | Apba2         | 0.000041    | 2.1796477 | up |
| ASMM9PARTA024887 | Ccdc90b       | 0.001811773 | 4.9244823 | up |
| ASMM9PARTA021373 | Akap2         | 0.0000136   | 2.826316  | up |
| ASMM9PARTA033834 | 2010106G01Rik | 0.000412    | 3.6309698 | up |
| ASMM9PARTA023274 | Mettl8        | 0.00927067  | 2.0223105 | up |
| ASMM9PARTA038903 | Lbr           | 0.007786574 | 3.6255786 | up |
| ASMM9PARTA041614 | Itpk1         | 0.001825231 | 2.00979   | up |
| ASMM9PARTA040339 | Olf196        | 0.000934    | 2.6193984 | up |
| ASMM9PARTA035587 | Lcel1d        | 0.02206017  | 2.868261  | up |
| ASMM9PARTA032481 | Cbln1         | 0.00000695  | 6.124395  | up |
| ASMM9PARTA033582 | Slc18a3       | 0.000162    | 2.2332523 | up |
| ASMM9PARTA023587 | Schip1        | 0.001891412 | 3.0521924 | up |
| ASMM9PARTA023477 | Slc14a2       | 0.004263157 | 2.3148105 | up |
| ASMM9PARTA035767 | Zfp715        | 0.000929    | 2.572336  | up |
| ASMM9PARTA043312 | Apol10b       | 0.018448599 | 2.277396  | up |
| ASMM9PARTA042964 | Ep300         | 0.000918    | 2.258293  | up |
| ASMM9PARTA029841 | Eif4ebp2      | 0.002615104 | 2.7991123 | up |
| ASMM9PARTA037995 | Clec2h        | 0.01248099  | 2.3497608 | up |
| ASMM9PARTA023701 | Pcp2          | 0.000000619 | 25.212336 | up |
| ASMM9PARTA040966 | Cxcl17        | 0.007967323 | 3.5091264 | up |
| ASMM9PARTA043668 | Edc4          | 0.006350893 | 2.4462724 | up |
| ASMM9PARTA031730 | Sp1           | 0.000372    | 2.3515835 | up |
| ASMM9PARTA036365 | Zfp618        | 0.000288    | 3.2602153 | up |
| ASMM9PARTA031057 | Ubt1          | 0.0000546   | 2.523026  | up |
| ASMM9PARTA037939 | Prl2c2        | 0.001083014 | 3.109749  | up |
| ASMM9PARTA022248 | C2cd4b        | 0.000107    | 2.0825863 | up |
| ASMM9PARTA041564 | Spata2        | 0.008401684 | 2.6905072 | up |
| ASMM9PARTA037407 | 2310079F23Rik | 0.000124    | 2.1839232 | up |
| ASMM9PARTA028440 | Mybl1         | 0.023467902 | 2.028853  | up |
| ASMM9PARTA030400 | Mab21l1       | 0.0000331   | 3.0003905 | up |
| ASMM9PARTA038572 | Tspan1        | 0.034594834 | 2.594937  | up |
| ASMM9PARTA042579 | Tmem169       | 0.00093     | 2.6716704 | up |
| ASMM9PARTA037599 | Trdn          | 0.0000921   | 2.4758415 | up |
| ASMM9PARTA024222 | Cntfr         | 0.000000512 | 21.353983 | up |
| ASMM9PARTA021485 | Elovl1        | 0.006396808 | 2.1231952 | up |
| ASMM9PARTA029305 | Emp1          | 0.023290558 | 2.564442  | up |
| ASMM9PARTA021180 | Ceacam1       | 0.026830751 | 2.2394369 | up |
| ASMM9PARTA027678 | Bmp5          | 0.044724654 | 2.2822754 | up |
| ASMM9PARTA034817 | 4921517D21Rik | 0.001154023 | 2.7680027 | up |
| ASMM9PARTA025907 | Phc3          | 0.038478695 | 2.958142  | up |
| ASMM9PARTA038817 | Chodl         | 0.0000495   | 2.328985  | up |
| ASMM9PARTA043857 | Uts2d         | 0.000000739 | 7.9098063 | up |
| ASMM9PARTA037047 | 4931428F04Rik | 0.031373866 | 2.776208  | up |
| ASMM9PARTA028903 | Phox2a        | 0.000243    | 4.1923914 | up |
| ASMM9PARTA042512 | 9230105E10Rik | 0.02026018  | 2.2860644 | up |
| ASMM9PARTA030005 | Hipk1         | 0.00000818  | 3.7615056 | up |
| ASMM9PARTA022678 | Prrt4         | 0.01517127  | 2.4829762 | up |
| ASMM9PARTA022707 | Krtap9-5      | 0.000147    | 4.1937265 | up |
| ASMM9PARTA030244 | Gsr           | 0.0000176   | 8.693484  | up |
| ASMM9PARTA030760 | Prl           | 0.0000032   | 3.077553  | up |
| ASMM9PARTA023344 | Keap1         | 0.010525669 | 2.0258892 | up |
| ASMM9PARTA030241 | Gnail         | 0.00000248  | 2.1913018 | up |
| ASMM9PARTA043415 | Prpf39        | 0.000218    | 3.234354  | up |
| ASMM9PARTA029529 | Dnase1        | 0.00255611  | 2.0792966 | up |
| ASMM9PARTA040116 | Olf169        | 0.017981159 | 2.7239904 | up |

|                  |               |             |           |    |
|------------------|---------------|-------------|-----------|----|
| ASMM9PARTA020086 | Whrn          | 0.004930127 | 2.1689317 | up |
| ASMM9PARTA020305 | 5730409E04Rik | 0.00921163  | 2.3247058 | up |
| ASMM9PARTA042538 | Grik4         | 0.025485823 | 2.4263203 | up |
| ASMM9PARTA020624 | Gal3st3       | 0.000868    | 4.257045  | up |
| ASMM9PARTA022377 | Slc4a11       | 0.006145392 | 2.10843   | up |
| ASMM9PARTA038269 | Clec2d        | 0.0000681   | 2.1642687 | up |
| ASMM9PARTA019864 | Olfir279      | 0.021622322 | 2.0405638 | up |
| ASMM9PARTA021401 | Scol          | 0.011102481 | 2.7820432 | up |
| ASMM9PARTA023023 | D3Ert254e     | 0.04715396  | 2.0502346 | up |
| ASMM9PARTA026309 | Rbms3         | 0.003286623 | 2.7078137 | up |
| ASMM9PARTA041163 | Ccdc137       | 0.007228469 | 3.271304  | up |
| ASMM9PARTA041255 | A630007B06Rik | 0.003440239 | 2.083166  | up |
| ASMM9PARTA021014 | Zfc3h1        | 0.002089937 | 2.2518246 | up |
| ASMM9PARTA023270 | Wdr36         | 0.00000589  | 2.239158  | up |
| ASMM9PARTA041305 | Cpne5         | 0.0000197   | 2.3959188 | up |
| ASMM9PARTA033677 | Stk25         | 0.00000142  | 2.2109196 | up |
| ASMM9PARTA041954 | Rln3          | 0.0000113   | 11.949367 | up |
| ASMM9PARTA031964 | Tmod4         | 0.003189421 | 2.0860846 | up |
| ASMM9PARTA024773 | Myef2         | 0.000247    | 2.0085769 | up |
| ASMM9PARTA029755 | Azi1          | 0.039897278 | 2.3221018 | up |
| ASMM9PARTA021805 | Sema3b        | 0.017367177 | 2.0740938 | up |
| ASMM9PARTA031919 | Atp2a3        | 0.012361143 | 2.219233  | up |
| ASMM9PARTA042749 | Actbl2        | 0.018392757 | 2.1176643 | up |
| ASMM9PARTA020588 | Chka          | 0.00000246  | 2.159946  | up |
| ASMM9PARTA040025 | 2610301G19Rik | 0.000672    | 2.2444727 | up |
| ASMM9PARTA031110 | Ywhaz         | 0.00000022  | 4.974651  | up |
| ASMM9PARTA039855 | Fam199x       | 0.003728605 | 3.1842735 | up |
| ASMM9PARTA038885 | Pcdha12       | 0.000652    | 2.2069955 | up |
| ASMM9PARTA020210 | 2700007P21Rik | 0.000505    | 6.5304055 | up |
| ASMM9PARTA033314 | Jmy           | 0.005640682 | 2.384646  | up |
| ASMM9PARTA030680 | Neurod1       | 0.00000557  | 3.6622305 | up |
| ASMM9PARTA040122 | Cacnb4        | 0.0000269   | 2.2965052 | up |
| ASMM9PARTA033174 | Ntn4          | 0.003987917 | 2.1934178 | up |
| ASMM9PARTA020841 | Plekhg1       | 0.006748208 | 2.8092928 | up |
| ASMM9PARTA033354 | Rhbg          | 0.022154806 | 3.0685782 | up |
| ASMM9PARTA041859 | Larp4b        | 0.004059287 | 2.7204006 | up |
| ASMM9PARTA043849 | Duxbl         | 0.001021026 | 2.7272217 | up |
| ASMM9PARTA039802 | Il17re        | 0.0000526   | 2.1716788 | up |
| ASMM9PARTA044087 | 4931429L15Rik | 0.04735245  | 2.1686256 | up |
| ASMM9PARTA030614 | Oc90          | 0.00645964  | 4.360575  | up |
| ASMM9PARTA021995 | Cep76         | 0.0000501   | 2.040232  | up |
| ASMM9PARTA025140 | Rrp1b         | 0.023219869 | 2.0569618 | up |
| ASMM9PARTA037729 | Apobec1       | 0.012179105 | 2.7671332 | up |
| ASMM9PARTA031745 | Fbxo6         | 0.031565513 | 2.1618094 | up |
| ASMM9PARTA037840 | Akap12        | 0.0000175   | 7.435588  | up |
| ASMM9PARTA020908 | Dnajb14       | 0.007936576 | 2.1309862 | up |
| ASMM9PARTA025186 | Krtap20-2     | 0.019794378 | 2.4835892 | up |
| ASMM9PARTA020953 | Ralgapa2      | 0.0000133   | 2.5162442 | up |
| ASMM9PARTA019915 | Zfyve26       | 0.009721629 | 2.249106  | up |
| ASMM9PARTA042120 | Frmd3         | 0.000357    | 2.1188087 | up |
| ASMM9PARTA036961 | 1700001C19Rik | 0.003972282 | 2.1194308 | up |
| ASMM9PARTA038935 | Ehd4          | 0.000731    | 3.6810253 | up |
| ASMM9PARTA042571 | Ankrd34b      | 0.009604597 | 2.5402524 | up |
| ASMM9PARTA037836 | F13b          | 0.006615834 | 2.5302463 | up |
| ASMM9PARTA021982 | Gpr155        | 0.016467305 | 2.3568723 | up |
| ASMM9PARTA042755 | Cnpy1         | 6.15E-09    | 9.576895  | up |
| ASMM9PARTA019700 | Amical        | 0.018433895 | 3.9024458 | up |

|                  |               |             |           |    |
|------------------|---------------|-------------|-----------|----|
| ASMM9PARTA027224 | Taok3         | 0.01789806  | 2.4219186 | up |
| ASMM9PARTA031132 | Cd70          | 0.00000529  | 7.2947025 | up |
| ASMM9PARTA036338 | Dzip11        | 0.013755283 | 2.3049047 | up |
| ASMM9PARTA042613 | Pcnx12        | 0.003755847 | 2.701153  | up |
| ASMM9PARTA030911 | St3gal5       | 0.007328525 | 2.544103  | up |
| ASMM9PARTA024346 | Zkscan3       | 0.04097148  | 3.0041509 | up |
| ASMM9PARTA042382 | Clcn3         | 0.0000302   | 2.0260973 | up |
| ASMM9PARTA024808 | Ttc15         | 4.86E-08    | 104.09621 | up |
| ASMM9PARTA022470 | Acin1         | 0.0000727   | 3.3000937 | up |
| ASMM9PARTA029776 | Dao           | 0.000003    | 7.0075417 | up |
| ASMM9PARTA039500 | Hnrnpul1      | 0.0000777   | 2.402664  | up |
| ASMM9PARTA038655 | Ugt2b38       | 0.033007827 | 2.453221  | up |
| ASMM9PARTA021040 | Trpm3         | 0.004312711 | 8.494691  | up |
| ASMM9PARTA029136 | Svs5          | 0.00000243  | 5.0985413 | up |
| ASMM9PARTA042786 | Mrgprb2       | 0.017246226 | 3.2687197 | up |
| ASMM9PARTA044237 | Tspan15       | 0.0000828   | 3.296772  | up |
| ASMM9PARTA037352 | Bicd2         | 0.001428681 | 2.7240407 | up |
| ASMM9PARTA023156 | Steap2        | 0.020860549 | 2.079492  | up |
| ASMM9PARTA022560 | Ncam1         | 0.000208    | 2.2651258 | up |
| ASMM9PARTA037824 | 1700061G19Rik | 0.02579874  | 2.0191689 | up |
| ASMM9PARTA031043 | Wdr1          | 0.00000761  | 2.3161047 | up |
| ASMM9PARTA032065 | Dlc1          | 0.000188    | 4.88514   | up |
| ASMM9PARTA034262 | Srsf9         | 0.0000446   | 3.1864085 | up |
| ASMM9PARTA037902 | Senp3         | 0.022381496 | 2.1704063 | up |
| ASMM9PARTA027033 | Kcnmb3        | 0.005849643 | 3.108935  | up |
| ASMM9PARTA039089 | Triobp        | 0.029576972 | 2.9908319 | up |
| ASMM9PARTA042748 | Zfp367        | 0.00054     | 2.1110482 | up |
| ASMM9PARTA042303 | Rab8b         | 0.012267113 | 2.140596  | up |
| ASMM9PARTA031678 | Figla         | 0.04417995  | 2.6710413 | up |
| ASMM9PARTA035267 | Ribc2         | 0.017934376 | 2.3886616 | up |
| ASMM9PARTA025590 | Bcas3         | 0.025509913 | 2.4655817 | up |
| ASMM9PARTA020151 | Taar2         | 0.002315064 | 3.5115612 | up |
| ASMM9PARTA038388 | Scgb3a1       | 0.025819426 | 2.0246587 | up |
| ASMM9PARTA025390 | Chn2          | 0.00000163  | 2.5671134 | up |
| ASMM9PARTA020325 | Olf288        | 0.000053    | 3.2774408 | up |
| ASMM9PARTA039455 | Galnt7        | 0.0000329   | 6.361879  | up |
| ASMM9PARTA028888 | Slc1a6        | 0.00000428  | 2.3305912 | up |
| ASMM9PARTA029080 | Zic1          | 0.000000692 | 2.1378815 | up |
| ASMM9PARTA032766 | Slc5a1        | 0.006583559 | 2.0172143 | up |
| ASMM9PARTA038418 | Pip4k2c       | 0.01396793  | 2.3580341 | up |
| ASMM9PARTA029599 | Brd2          | 0.004400514 | 2.2205582 | up |
| ASMM9PARTA044093 | Kcnv2         | 0.01415794  | 3.1431258 | up |
| ASMM9PARTA026094 | Plscr3        | 0.005433633 | 2.009998  | up |
| ASMM9PARTA020744 | Ccdc141       | 0.000738    | 3.8202212 | up |
| ASMM9PARTA042368 | Ccdc88a       | 0.000716    | 2.8191738 | up |
| ASMM9PARTA039075 | Cyrr1         | 0.003206401 | 3.874123  | up |
| ASMM9PARTA043130 | Exoc3l        | 0.003598359 | 3.419214  | up |
| ASMM9PARTA020725 | Crls1         | 0.00000938  | 2.3094146 | up |
| ASMM9PARTA022705 | Gm436         | 0.000322    | 5.842333  | up |
| ASMM9PARTA020793 | Dusp27        | 0.035250545 | 2.0139375 | up |
| ASMM9PARTA033406 | Sap30         | 0.00000588  | 2.3725853 | up |
| ASMM9PARTA019738 | Rhox8         | 0.00616448  | 2.5611932 | up |
| ASMM9PARTA022123 | Ash2l         | 0.042711552 | 4.4007535 | up |
| ASMM9PARTA021003 | Trpm3         | 0.000169    | 5.5811014 | up |
| ASMM9PARTA028835 | Ppl           | 0.001390428 | 2.8787844 | up |
| ASMM9PARTA040971 | Olf178        | 0.033310827 | 2.611279  | up |
| ASMM9PARTA029802 | Cdkn1b        | 0.044495378 | 2.1857147 | up |

|                  |               |             |           |    |
|------------------|---------------|-------------|-----------|----|
| ASMM9PARTA024271 | Pax3          | 0.001955256 | 2.8865151 | up |
| ASMM9PARTA024457 | Fas           | 0.0000141   | 2.75859   | up |
| ASMM9PARTA020936 | Calca         | 0.0000145   | 2.3954597 | up |
| ASMM9PARTA030813 | Stat5b        | 0.00499773  | 2.0365803 | up |
| ASMM9PARTA024760 | Atp2a3        | 0.000252    | 3.25739   | up |
| ASMM9PARTA026365 | Arpc4         | 0.028725602 | 3.921665  | up |
| ASMM9PARTA029490 | Dag1          | 0.013240523 | 2.0206296 | up |
| ASMM9PARTA042277 | St18          | 0.00024     | 2.536438  | up |
| ASMM9PARTA025384 | Puf60         | 0.00000617  | 2.2255862 | up |
| ASMM9PARTA032045 | Uncx          | 0.0000432   | 2.0601583 | up |
| ASMM9PARTA030329 | Zbtb7a        | 0.00000311  | 2.444849  | up |
| ASMM9PARTA041502 | Snx30         | 0.000237    | 2.8903682 | up |
| ASMM9PARTA023018 | Gabra6        | 0.000000593 | 45.63106  | up |
| ASMM9PARTA030388 | Igfbp5        | 0.04744752  | 2.3861468 | up |
| ASMM9PARTA021744 | Xlr5a         | 0.027561773 | 3.5007346 | up |
| ASMM9PARTA031158 | Saa3          | 0.000092    | 3.4086795 | up |
| ASMM9PARTA043447 | Grm3          | 0.0000094   | 2.6368442 | up |
| ASMM9PARTA028683 | Pcp2          | 0.000574    | 2.5662684 | up |
| ASMM9PARTA045008 | Dpp6          | 0.0000211   | 2.1643553 | up |
| ASMM9PARTA041081 | Olfir711      | 0.030779494 | 2.0663273 | up |
| ASMM9PARTA026355 | Tfdp2         | 0.041753415 | 3.2512505 | up |
| ASMM9PARTA033151 | Rbfox1        | 0.000000545 | 8.581732  | up |
| ASMM9PARTA035464 | Srrm4         | 0.0000115   | 2.044778  | up |
| ASMM9PARTA029782 | Dffa          | 0.000151    | 2.584579  | up |
| ASMM9PARTA038007 | Sf3b1         | 0.000002    | 2.5554943 | up |
| ASMM9PARTA044527 | Tex2          | 0.000131    | 2.2574747 | up |
| ASMM9PARTA029581 | Cga           | 0.001247127 | 2.0177164 | up |
| ASMM9PARTA033642 | Clstn1        | 0.000517    | 2.3315802 | up |
| ASMM9PARTA020822 | Gm694         | 0.0000146   | 2.0105753 | up |
| ASMM9PARTA030500 | Klk1b11       | 0.000000237 | 2.9923458 | up |
| ASMM9PARTA032269 | Ddc           | 0.002748172 | 2.1244123 | up |
| ASMM9PARTA042600 | Srrm2         | 0.000000588 | 2.1800425 | up |
| ASMM9PARTA039943 | Olah          | 0.011828708 | 2.0999353 | up |
| ASMM9PARTA038207 | Calcb         | 0.00598834  | 2.010279  | up |
| ASMM9PARTA030188 | Mecp2         | 0.000000383 | 2.2802384 | up |
| ASMM9PARTA041004 | 2210018M11Rik | 0.037067667 | 2.0723267 | up |
| ASMM9PARTA030775 | Sftpc         | 0.01568264  | 2.4331853 | up |
| ASMM9PARTA024458 | Cas21         | 0.005312582 | 2.271022  | up |
| ASMM9PARTA027171 | App           | 0.0000321   | 2.267833  | up |
| ASMM9PARTA038850 | Glde          | 0.019490713 | 2.4809875 | up |
| ASMM9PARTA038170 | Rims1         | 0.000779    | 2.1298378 | up |
| ASMM9PARTA026421 | Plch1         | 0.006341245 | 2.4133396 | up |
| ASMM9PARTA029664 | Cyp2b10       | 0.043919038 | 2.1898785 | up |
| ASMM9PARTA026908 | Fxyd2         | 0.015080172 | 3.4752994 | up |
| ASMM9PARTA019935 | Txlna         | 0.00000348  | 6.327588  | up |
| ASMM9PARTA027734 | Ebfl          | 0.006859016 | 2.664445  | up |
| ASMM9PARTA043988 | Actl9         | 0.04139674  | 2.1593118 | up |
| ASMM9PARTA044488 | Ostn          | 0.0000927   | 2.5186367 | up |
| ASMM9PARTA030282 | Hp1bp3        | 0.000633    | 3.4439776 | up |
| ASMM9PARTA033144 | Accn5         | 0.005091173 | 2.6091871 | up |
| ASMM9PARTA045012 | Olfir1321     | 0.020510351 | 2.1040514 | up |
| ASMM9PARTA026178 | Rbms3         | 0.000528    | 2.580435  | up |
| ASMM9PARTA027749 | Gh            | 0.000000477 | 6.586476  | up |
| ASMM9PARTA020962 | Akap2         | 0.00000119  | 2.3027155 | up |
| ASMM9PARTA030450 | Gsbs          | 0.0000045   | 3.9371283 | up |
| ASMM9PARTA036674 | Pscs          | 0.04340225  | 2.665277  | up |
| ASMM9PARTA025585 | Slc38a1       | 0.01696703  | 2.1143532 | up |

|                  |               |             |           |    |
|------------------|---------------|-------------|-----------|----|
| ASMM9PARTA031638 | Uts2          | 0.0000771   | 11.368202 | up |
| ASMM9PARTA023362 | Qrich1        | 0.006923941 | 2.5978963 | up |
| ASMM9PARTA023233 | Skor2         | 0.000428    | 4.101804  | up |
| ASMM9PARTA033226 | Sdf2l1        | 8.46E-08    | 3.1844397 | up |
| ASMM9PARTA037810 | Usp26         | 0.004630403 | 2.0790303 | up |
| ASMM9PARTA035707 | 4921528I01Rik | 0.02707344  | 2.1914601 | up |
| ASMM9PARTA027331 | Btg1          | 0.020830113 | 2.2247374 | up |
| ASMM9PARTA027827 | Cd38          | 0.001257424 | 2.0815308 | up |
| ASMM9PARTA024004 | Dedd          | 0.000289    | 6.3812113 | up |
| ASMM9PARTA029430 | Akap2         | 0.000023    | 2.630236  | up |
| ASMM9PARTA027630 | Gbas          | 0.000265    | 2.0316691 | up |
| ASMM9PARTA022642 | Scn2a1        | 0.0000421   | 2.0201728 | up |
| ASMM9PARTA041481 | Zswim4        | 0.0000687   | 2.4257221 | up |
| ASMM9PARTA044533 | Zfp933        | 0.00000407  | 6.508013  | up |
| ASMM9PARTA022278 | Trio          | 0.000261    | 2.1059213 | up |
| ASMM9PARTA029751 | Alox5         | 0.005694531 | 2.5102727 | up |
| ASMM9PARTA033028 | Miox          | 0.0000209   | 2.7134473 | up |
| ASMM9PARTA037987 | Bcl3          | 0.000000928 | 2.3982546 | up |
| ASMM9PARTA027912 | Dcn           | 0.03230018  | 2.1511126 | up |
| ASMM9PARTA042372 | 6430573F11Rik | 0.0000004   | 5.1928716 | up |
| ASMM9PARTA022716 | Cep170        | 0.019999761 | 2.7042885 | up |
| ASMM9PARTA043521 | Gprc5a        | 0.0000665   | 2.73489   | up |
| ASMM9PARTA030995 | Sdc4          | 0.0000116   | 2.133687  | up |
| ASMM9PARTA023518 | Cry2          | 0.001406526 | 2.1740687 | up |
| ASMM9PARTA038488 | Dpf3          | 0.000276    | 2.008091  | up |
| ASMM9PARTA037101 | Pibf1         | 0.003939726 | 2.0952516 | up |
| ASMM9PARTA042594 | Hnrnp1        | 0.000000979 | 6.9169126 | up |
| ASMM9PARTA030942 | Prnp          | 0.00000222  | 2.304952  | up |
| ASMM9PARTA032730 | Ppp4c         | 0.0000744   | 2.2432292 | up |
| ASMM9PARTA023801 | 8430427H17Rik | 0.002993711 | 2.563201  | up |
| ASMM9PARTA041201 | Rbm45         | 0.0000085   | 2.9006667 | up |
| ASMM9PARTA043858 | Nhlh2         | 0.013809101 | 2.8469856 | up |
| ASMM9PARTA042037 | Aqp6          | 0.0000062   | 7.5544186 | up |
| ASMM9PARTA033259 | Tlx1          | 0.000000911 | 8.637319  | up |
| ASMM9PARTA025291 | Prph          | 0.0000025   | 3.4916854 | up |
| ASMM9PARTA029843 | En2           | 0.00000393  | 3.2560978 | up |
| ASMM9PARTA020162 | Olf287        | 0.0000831   | 2.5563526 | up |
| ASMM9PARTA027745 | Gabra6        | 0.000287    | 40.717136 | up |
| ASMM9PARTA028216 | Lcn2          | 0.00000166  | 5.038747  | up |
| ASMM9PARTA036680 | Gcap14        | 0.0000229   | 2.0007617 | up |
| ASMM9PARTA023569 | Rhbdd1        | 0.044193663 | 2.053171  | up |
| ASMM9PARTA033589 | Eral1         | 0.000145    | 2.0973113 | up |
| ASMM9PARTA028676 | Rbbp4         | 0.000014    | 2.3795025 | up |
| ASMM9PARTA027065 | Kcnip1        | 0.000153    | 2.501945  | up |
| ASMM9PARTA033269 | Klk1b27       | 0.000233    | 2.1436794 | up |
| ASMM9PARTA021113 | Rbfox3        | 0.000019    | 2.5786054 | up |
| ASMM9PARTA032825 | Nmu           | 0.003168894 | 2.6354065 | up |
| ASMM9PARTA024585 | Ptprr         | 0.006181602 | 5.7722845 | up |
| ASMM9PARTA022268 | 4930420K17Rik | 0.00000348  | 2.3743002 | up |
| ASMM9PARTA024350 | Lgals3        | 0.002607916 | 2.1792047 | up |
| ASMM9PARTA039119 | Otub1         | 0.0000673   | 3.2754765 | up |
| ASMM9PARTA028752 | Olf15         | 0.021944268 | 2.1585197 | up |
| ASMM9PARTA022310 | Mfhas1        | 0.00000266  | 3.0768075 | up |
| ASMM9PARTA023780 | Bcl2l15       | 0.00000581  | 6.381978  | up |
| ASMM9PARTA031902 | Eif2ak4       | 0.04231555  | 2.1145937 | up |
| ASMM9PARTA034497 | Arl4d         | 0.0000233   | 2.2362335 | up |
| ASMM9PARTA023424 | Fcrl5         | 0.000000589 | 4.7957745 | up |

|                  |               |             |           |    |
|------------------|---------------|-------------|-----------|----|
| ASMM9PARTA027514 | Epx           | 0.002280834 | 2.2140546 | up |
| ASMM9PARTA029298 | Ch25h         | 0.00000248  | 2.6407201 | up |
| ASMM9PARTA025339 | Taok2         | 0.00000441  | 2.3447692 | up |
| ASMM9PARTA028168 | Inhba         | 0.007865816 | 4.527508  | up |
| ASMM9PARTA037704 | Gigyfl        | 0.00000187  | 2.053103  | up |
| ASMM9PARTA020076 | Mreg          | 0.027675852 | 2.262513  | up |
| ASMM9PARTA023622 | Ucma          | 0.00095     | 2.022368  | up |
| ASMM9PARTA036721 | Ms4a6c        | 0.00000163  | 2.016897  | up |
| ASMM9PARTA032636 | Zfp326        | 0.00479378  | 2.0007935 | up |
| ASMM9PARTA019691 | Pcdhac2       | 0.00000802  | 2.049352  | up |
| ASMM9PARTA019829 | Limch1        | 0.016721118 | 2.5045152 | up |
| ASMM9PARTA036204 | Cul5          | 0.007891292 | 2.0390193 | up |
| ASMM9PARTA020277 | MacroD2       | 0.000331    | 2.1779914 | up |
| ASMM9PARTA030926 | Xdh           | 0.00000665  | 2.641078  | up |
| ASMM9PARTA024013 | Megfl1        | 0.0000164   | 2.6995435 | up |
| ASMM9PARTA033890 | 4930455C21Rik | 0.000577    | 2.4747503 | up |
| ASMM9PARTA029947 | Gal           | 0.0000802   | 2.4134696 | up |
| ASMM9PARTA033482 | Ankrd36       | 0.017776307 | 2.115237  | up |
| ASMM9PARTA042242 | Clen3         | 0.000104    | 2.057571  | up |
| ASMM9PARTA041245 | Nrn1          | 0.0000133   | 3.3465772 | up |
| ASMM9PARTA021504 | Prl2c1        | 0.015831161 | 2.827291  | up |
| ASMM9PARTA043734 | Prl2c5        | 0.00000574  | 4.5089    | up |
| ASMM9PARTA031598 | Schip1        | 0.00000488  | 5.9925    | up |
| ASMM9PARTA026984 | App           | 0.00000141  | 2.2700558 | up |
| ASMM9PARTA032569 | Il22          | 0.00000113  | 28.121023 | up |
| ASMM9PARTA025388 | Prph          | 0.0000529   | 2.354521  | up |
| ASMM9PARTA023048 | Lyn           | 0.00415865  | 3.4413486 | up |
| ASMM9PARTA044577 | Dand5         | 0.01038326  | 2.4686186 | up |
| ASMM9PARTA028172 | Klk1b5        | 0.000492    | 2.18727   | up |
| ASMM9PARTA041787 | Zfp609        | 0.027383152 | 2.2025447 | up |
| ASMM9PARTA042824 | Rab11fip4     | 0.005243877 | 2.2061822 | up |
| ASMM9PARTA025216 | Atp2a3        | 0.020483285 | 2.2597837 | up |
| ASMM9PARTA024523 | Celf4         | 0.027295299 | 2.2297    | up |
| ASMM9PARTA022018 | Paip1         | 0.000975    | 2.0925379 | up |
| ASMM9PARTA021266 | Il20rb        | 7.98E-08    | 15.495012 | up |
| ASMM9PARTA042557 | Lingo4        | 0.00009     | 2.0992484 | up |
| ASMM9PARTA044835 | Acsn3         | 0.011098072 | 3.2589226 | up |
| ASMM9PARTA043837 | Elfn2         | 0.0000177   | 2.1600103 | up |
| ASMM9PARTA043268 | BC048502      | 0.001429616 | 3.2668848 | up |
| ASMM9PARTA035845 | Rpfl          | 0.004638776 | 2.01361   | up |
| ASMM9PARTA040101 | Als2          | 0.00000759  | 2.0729184 | up |
| ASMM9PARTA030501 | Klk1b26       | 0.0000112   | 3.3850658 | up |
| ASMM9PARTA024192 | Kif2a         | 0.006471478 | 2.356188  | up |
| ASMM9PARTA030989 | Stat3         | 0.0000341   | 2.0919695 | up |
| ASMM9PARTA032843 | Amac1         | 0.001432844 | 3.1314535 | up |
| ASMM9PARTA041636 | Nup214        | 0.001879399 | 2.6814542 | up |
| ASMM9PARTA035781 | Prdm16        | 0.010508808 | 4.65794   | up |
| ASMM9PARTA030182 | Lig1          | 0.001845976 | 3.0934188 | up |
| ASMM9PARTA032436 | Irx4          | 0.001233913 | 2.1811604 | up |
| ASMM9PARTA044591 | Plac9         | 0.000114    | 2.62367   | up |
| ASMM9PARTA042086 | Pcyox11       | 0.00006     | 2.168047  | up |
| ASMM9PARTA039937 | Ces2c         | 0.021259435 | 2.812997  | up |
| ASMM9PARTA036767 | Rnf6          | 0.000387    | 2.0789928 | up |
| ASMM9PARTA027019 | Calm3         | 0.000432    | 2.041094  | up |
| ASMM9PARTA025131 | Prl           | 0.00000679  | 2.659923  | up |
| ASMM9PARTA019948 | Olfrl415      | 0.0000343   | 2.0981004 | up |
| ASMM9PARTA019879 | Ypel4         | 0.00000789  | 2.118269  | up |



|                  |               |             |             |      |
|------------------|---------------|-------------|-------------|------|
| ASMM9PARTA032130 | Dmp1          | 0.00000327  | 3.0958586   | up   |
| ASMM9PARTA037877 | Tsgal4        | 0.022264006 | 2.6934185   | up   |
| ASMM9PARTA032235 | Prok2         | 0.001968308 | 2.548295    | up   |
| ASMM9PARTA029091 | Sfrp2         | 0.000742    | 2.5556793   | up   |
| ASMM9PARTA022380 | Irs2          | 0.0000298   | 2.5150023   | up   |
| ASMM9PARTA030109 | Hrc           | 0.000366    | 5.5128555   | up   |
| ASMM9PARTA028348 | Hmx3          | 0.021100137 | 2.0058124   | up   |
| ASMM9PARTA030499 | Kcnj12        | 0.0000302   | 2.0685737   | up   |
| ASMM9PARTA043489 | 4933402J07Rik | 0.0000423   | 3.640099    | up   |
| ASMM9PARTA041434 | Nphp3         | 0.000332    | 2.961486    | up   |
| ASMM9PARTA041883 | Al118078      | 0.020297442 | 2.475887    | up   |
| ASMM9PARTA020861 | Alpk2         | 0.0000717   | 2.3543413   | up   |
| ASMM9PARTA042122 | Man2a2        | 0.000695    | 3.2351592   | up   |
| ASMM9PARTA040038 | Olfir657      | 0.024216658 | 2.526638    | up   |
| ASMM9PARTA028968 | Tnnc1         | 0.0000556   | 2.721746    | up   |
| ASMM9PARTA020569 | Thoc2         | 0.009915572 | 3.643276    | up   |
| ASMM9PARTA027376 | Cdkn1a        | 0.00000449  | 3.9448357   | up   |
| ASMM9PARTA029974 | Dlx3          | 0.01115084  | 2.501846    | up   |
| ASMM9PARTA027262 | Car8          | 0.000000896 | 10.347539   | up   |
| ASMM9PARTA032218 | Atoh7         | 0.001012383 | 2.1158974   | up   |
| ASMM9PARTA026717 | Rhox3b        | 0.002659484 | 3.030071    | up   |
| ASMM9PARTA033272 | Vav3          | 0.004049175 | 2.184858    | up   |
| ASMM9PARTA039324 | Afm           | 0.039152432 | 2.4595587   | up   |
| ASMM9PARTA024680 | Reg3d         | 0.03834498  | 3.995596    | up   |
| ASMM9PARTA041791 | Cbln2         | 0.000367    | 2.1172154   | up   |
| ASMM9PARTA020649 | Zbtb16        | 0.002291162 | 2.6081762   | up   |
| ASMM9PARTA041303 | Olfm3         | 0.0000532   | 2.670419    | up   |
| ASMM9PARTA030114 | Il16          | 0.00000909  | 2.228048    | up   |
| ASMM9PARTA022516 | Neto2         | 0.0000507   | 2.480403    | up   |
| ASMM9PARTA020433 | Olfir304      | 0.015975207 | 2.2241602   | up   |
| ASMM9PARTA038890 | Dnajc17       | 0.04247645  | 2.2162783   | up   |
| ASMM9PARTA028957 | Sox11         | 0.00000391  | 2.1375854   | up   |
| ASMM9PARTA024209 | Ttll3         | 0.0000696   | 2.4078317   | up   |
| ASMM9PARTA042973 | Slc9a4        | 0.03867477  | 0.376517563 | down |
| ASMM9PARTA044432 | 4933407P14Rik | 0.000379    | 0.448516093 | down |
| ASMM9PARTA023108 | Zfp703        | 0.03617445  | 0.33909248  | down |
| ASMM9PARTA025664 | Gm6904        | 0.000615    | 0.479088414 | down |
| ASMM9PARTA041768 | Gbp9          | 0.000352    | 0.490601113 | down |
| ASMM9PARTA031904 | Skp2          | 0.02077741  | 0.445450728 | down |
| ASMM9PARTA039399 | Ccdc136       | 0.039321084 | 0.392621018 | down |
| ASMM9PARTA022725 | Kng2          | 0.000044    | 0.433482876 | down |
| ASMM9PARTA028818 | Th            | 0.0000139   | 0.40541319  | down |
| ASMM9PARTA022035 | Kcna10        | 0.002918199 | 0.398040241 | down |
| ASMM9PARTA043810 | Krtap13-1     | 0.03193396  | 0.488030682 | down |
| ASMM9PARTA031995 | Postn         | 0.001804427 | 0.396111657 | down |
| ASMM9PARTA037112 | Rpl18a        | 3.76E-09    | 0.066564021 | down |
| ASMM9PARTA021278 | Pm20d2        | 0.011180944 | 0.494348704 | down |
| ASMM9PARTA029936 | Cyp2d9        | 0.0000192   | 0.318785199 | down |
| ASMM9PARTA036396 | F11           | 0.021282494 | 0.464336367 | down |
| ASMM9PARTA029513 | Cd3g          | 0.049232278 | 0.387342874 | down |
| ASMM9PARTA029838 | Cyp2d10       | 0.000412    | 0.447776258 | down |
| ASMM9PARTA020724 | Lce3f         | 0.000416    | 0.243116207 | down |
| ASMM9PARTA023568 | Mup10         | 0.000000135 | 0.209730382 | down |
| ASMM9PARTA039210 | Pth2r         | 0.029752199 | 0.322729163 | down |
| ASMM9PARTA028744 | Serpina1c     | 0.00000528  | 0.236018093 | down |
| ASMM9PARTA029778 | Slc6a3        | 0.00000648  | 0.350588173 | down |
| ASMM9PARTA034613 | Mcm8          | 0.002277384 | 0.465156239 | down |

|                      |               |             |             |      |
|----------------------|---------------|-------------|-------------|------|
| ASMM9PARTA033715     | Foxb1         | 0.0000722   | 0.370373402 | down |
| ASMM9PARTA032497     | Fabp1         | 0.0000189   | 0.255029175 | down |
| ASMM9PARTA042775     | Myh8          | 0.01402403  | 0.331372086 | down |
| ASMM9PARTA022182     | Mup6          | 0.000305    | 0.287943503 | down |
| ASMM9PARTA029223     | Apoa1         | 0.000101    | 0.076311394 | down |
| ASMM9PARTA037527     | 1700110M21Rik | 0.017526075 | 0.390415975 | down |
| ASMM9PARTA022540     | Ttll2         | 0.015117502 | 0.437657524 | down |
| ASMM9PARTA028164     | Ifit1         | 0.0000408   | 0.405080225 | down |
| ASMM9PARTA032773     | Scand1        | 0.001195885 | 0.285031456 | down |
| ASMM9PARTA022679     | Gm15104       | 0.024647413 | 0.410321473 | down |
| ASMM9PARTA028385     | Hsd3b5        | 0.000127    | 0.116294797 | down |
| ASMM9PARTA031062     | Tnnt1         | 0.00000124  | 0.460475754 | down |
| ASMM9PARTA029830     | Chi3l3        | 0.003989127 | 0.461662251 | down |
| ASMM9PARTA026369     | Fam47e        | 0.01762749  | 0.279349319 | down |
| ASMM9PARTA028854     | Serpinalb     | 0.00000759  | 0.152172108 | down |
| ASMM9PARTA024525     | Rdh7          | 0.000109    | 0.416357469 | down |
| ASMM9PARTA028615     | Mup5          | 0.000575    | 0.324830927 | down |
| ASMM9PARTA027299     | Alox12        | 0.003108772 | 0.47511362  | down |
| ASMM9PARTA040898     | Olf167        | 0.000482    | 0.201708674 | down |
| CUST_305_PI426409190 | Ccl28         | 0.002444553 | 0.3063397   | down |
| ASMM9PARTA021492     | Gbp11         | 0.000042    | 0.373694033 | down |
| ASMM9PARTA023640     | Igsf9b        | 0.001457356 | 0.411119635 | down |
| ASMM9PARTA032166     | Ahcy          | 0.000000561 | 0.493928873 | down |
| ASMM9PARTA022794     | Rbm8a         | 4.41E-08    | 0.136787083 | down |
| ASMM9PARTA029884     | Gata6         | 0.002253278 | 0.489105948 | down |
| ASMM9PARTA040145     | Olf1360       | 0.001774364 | 0.351478653 | down |
| ASMM9PARTA027393     | Alx4          | 0.011402214 | 0.465946097 | down |
| ASMM9PARTA029029     | Serpina1e     | 0.0000163   | 0.216747893 | down |
| ASMM9PARTA043514     | Fibcd1        | 0.000000714 | 0.464382016 | down |
| ASMM9PARTA036982     | Trim14        | 0.001675722 | 0.26899079  | down |
| ASMM9PARTA023802     | LOC100048885  | 0.00000561  | 0.472990672 | down |
| ASMM9PARTA029472     | Alb           | 0.0000443   | 0.10484613  | down |
| ASMM9PARTA043606     | Slc25a31      | 0.002886053 | 0.491543293 | down |
| ASMM9PARTA023296     | Gm3448        | 0.00000256  | 0.204340394 | down |
| ASMM9PARTA021801     | Lhx9          | 0.002228591 | 0.42917895  | down |
| ASMM9PARTA036700     | Cep97         | 0.003294515 | 0.498130963 | down |
| ASMM9PARTA028759     | Serpinf2      | 0.001516082 | 0.445709566 | down |
| ASMM9PARTA021558     | Lce3a         | 0.046632025 | 0.418816031 | down |
| ASMM9PARTA020879     | Gpr55         | 0.034335684 | 0.496669335 | down |
| ASMM9PARTA027011     | Mup15         | 0.000000216 | 0.187041643 | down |
| ASMM9PARTA026146     | Slc10a1       | 0.001654563 | 0.149810162 | down |
| ASMM9PARTA035444     | Pnlip         | 0.001649244 | 0.468657587 | down |
| ASMM9PARTA038738     | Pou4f2        | 0.00000366  | 0.265904775 | down |
| ASMM9PARTA031095     | Sox14         | 0.0000334   | 0.336051542 | down |
| ASMM9PARTA028119     | Orml          | 0.000292    | 0.341020643 | down |
| ASMM9PARTA043538     | Creb3l2       | 0.000751    | 0.439219798 | down |
| ASMM9PARTA027947     | Epyc          | 0.001967873 | 0.337541269 | down |
| ASMM9PARTA020324     | Skap1         | 0.000839    | 0.265300947 | down |
| ASMM9PARTA031037     | Try4          | 0.016354358 | 0.354634728 | down |
| ASMM9PARTA029399     | Adora3        | 0.015459116 | 0.321788754 | down |
| ASMM9PARTA030022     | H2-Q10        | 0.0000472   | 0.390551772 | down |
| ASMM9PARTA025627     | Vmn1r168      | 0.0000566   | 0.433849963 | down |
| ASMM9PARTA042003     | Adhfe1        | 0.000239    | 0.497323851 | down |
| ASMM9PARTA031618     | Cd3d          | 0.037102643 | 0.344743148 | down |
| ASMM9PARTA019833     | Try5          | 0.03331522  | 0.203805165 | down |
| ASMM9PARTA025046     | Gm8267        | 0.00369292  | 0.453755096 | down |
| ASMM9PARTA040316     | Olf1849       | 0.047231596 | 0.31355409  | down |

|                  |               |             |             |      |
|------------------|---------------|-------------|-------------|------|
| ASMM9PARTA031514 | Phtf1         | 0.00000299  | 0.414216078 | down |
| ASMM9PARTA036263 | Veph1         | 0.0000846   | 0.497557738 | down |
| ASMM9PARTA028234 | Hhex          | 0.0000461   | 0.385337552 | down |
| ASMM9PARTA030281 | Hoxc6         | 0.039953146 | 0.434038892 | down |
| ASMM9PARTA044750 | Serpnb3c      | 0.04825284  | 0.400899699 | down |
| ASMM9PARTA034590 | Fam187a       | 0.0000792   | 0.2252953   | down |
| ASMM9PARTA023758 | Samd3         | 0.00218318  | 0.438376726 | down |
| ASMM9PARTA027261 | C4bp          | 0.000519    | 0.496951377 | down |
| ASMM9PARTA029274 | Thrb          | 0.012458769 | 0.158537935 | down |
| ASMM9PARTA023546 | Serac1        | 0.031806257 | 0.267892299 | down |
| ASMM9PARTA040990 | Rgs13         | 0.007759217 | 0.246271062 | down |
| ASMM9PARTA037288 | Ocel1         | 0.04141541  | 0.431192779 | down |
| ASMM9PARTA040340 | Olfr1238      | 0.047306612 | 0.455096204 | down |
| ASMM9PARTA041362 | Pus7l         | 0.025421258 | 0.435781875 | down |
| ASMM9PARTA031999 | Bhmt          | 0.00000961  | 0.381095615 | down |
| ASMM9PARTA041165 | Mmp21         | 0.001219689 | 0.288006223 | down |
| ASMM9PARTA024174 | Utp14b        | 0.001987715 | 0.356708005 | down |
| ASMM9PARTA028812 | Serpina1d     | 0.0000631   | 0.1650119   | down |
| ASMM9PARTA020150 | Mcoln2        | 0.002898456 | 0.402482707 | down |
| ASMM9PARTA030350 | Foxa2         | 0.00000145  | 0.082502601 | down |
| ASMM9PARTA021692 | Mup3          | 9.91E-08    | 0.299104064 | down |
| ASMM9PARTA028663 | Prg2          | 0.000000599 | 0.22314286  | down |
| ASMM9PARTA037956 | Ear11         | 0.003546286 | 0.306079204 | down |
| ASMM9PARTA035348 | Iqcf3         | 0.0000254   | 0.239425417 | down |
| ASMM9PARTA028873 | Psp           | 0.010985192 | 0.365431603 | down |
| ASMM9PARTA024259 | Runx2         | 0.047490794 | 0.399721043 | down |
| ASMM9PARTA043655 | Aldh8a1       | 0.04789538  | 0.443317079 | down |
| ASMM9PARTA019794 | Zfp457        | 0.0000181   | 0.487699226 | down |
| ASMM9PARTA034514 | 4921530L21Rik | 0.000753    | 0.33422413  | down |
| ASMM9PARTA026360 | Zdhhc24       | 0.005325407 | 0.440434339 | down |
| ASMM9PARTA025047 | 1700024P16Rik | 0.0000715   | 0.276017994 | down |
| ASMM9PARTA042990 | Mogat2        | 0.002202216 | 0.42248706  | down |
| ASMM9PARTA028583 | Mup2          | 0.000000994 | 0.185906063 | down |
| ASMM9PARTA042987 | Myo1d         | 0.046635848 | 0.411749181 | down |
| ASMM9PARTA022033 | Arfip1        | 0.000000249 | 0.38165011  | down |
| ASMM9PARTA027860 | Il7r          | 0.006350752 | 0.458992782 | down |
| ASMM9PARTA020245 | Ear12         | 0.0000858   | 0.380890974 | down |
| ASMM9PARTA027403 | Cfc1          | 0.04367976  | 0.489494206 | down |
| ASMM9PARTA040779 | Zc3h12a       | 0.047002077 | 0.417886774 | down |
| ASMM9PARTA027052 | Mup14         | 0.000000437 | 0.163261681 | down |
| ASMM9PARTA027050 | 4931406C07Rik | 0.002749908 | 0.499306389 | down |
| ASMM9PARTA022613 | Gm10922       | 0.04994502  | 0.360763076 | down |
| ASMM9PARTA027313 | C1qtnf1       | 0.008685808 | 0.400488147 | down |
| ASMM9PARTA038186 | Cacng6        | 0.003250514 | 0.370132005 | down |
| ASMM9PARTA037382 | Pbp2          | 1.58E-09    | 0.094225015 | down |
| ASMM9PARTA029641 | Crisp3        | 0.001753711 | 0.343192322 | down |
| ASMM9PARTA021544 | Mup2          | 0.0000151   | 0.346992123 | down |
| ASMM9PARTA035271 | Plxnd1        | 0.000229    | 0.382752118 | down |
| ASMM9PARTA021108 | Gm6878        | 0.000862    | 0.410802327 | down |
| ASMM9PARTA043806 | 1700067K01Rik | 0.000813    | 0.424293231 | down |
| ASMM9PARTA041493 | Igsf11        | 0.004404892 | 0.351616698 | down |
| ASMM9PARTA020098 | Olfr832       | 0.013129888 | 0.463510936 | down |
| ASMM9PARTA026076 | Exog          | 0.003181372 | 0.411773951 | down |
| ASMM9PARTA028274 | Foxa1         | 0.0000121   | 0.097204212 | down |
| ASMM9PARTA022904 | Vmn2r72-ps    | 0.014047643 | 0.353126485 | down |
| ASMM9PARTA044658 | C1ql2         | 0.00000198  | 0.430703546 | down |
| ASMM9PARTA025240 | Zfp605        | 0.0000662   | 0.352834297 | down |

|                  |          |             |             |      |
|------------------|----------|-------------|-------------|------|
| ASMM9PARTA027849 | Hcfc1    | 0.010743204 | 0.491653204 | down |
| ASMM9PARTA032061 | Casp9    | 0.000454    | 0.452595386 | down |
| ASMM9PARTA030808 | Slfn3    | 0.033985566 | 0.399375217 | down |
| ASMM9PARTA025399 | Ick      | 0.015424635 | 0.391674136 | down |
| ASMM9PARTA040706 | Olf399   | 0.002206543 | 0.364324526 | down |
| ASMM9PARTA032995 | Sec1     | 0.000348    | 0.477181651 | down |
| ASMM9PARTA042840 | Casc1    | 0.029330386 | 0.412621157 | down |
| ASMM9PARTA021981 | Tmpo     | 0.003964028 | 0.372571426 | down |
| ASMM9PARTA031165 | Snai2    | 0.012039218 | 0.323816486 | down |
| ASMM9PARTA037618 | Akr1c6   | 0.002201672 | 0.324927038 | down |
| ASMM9PARTA019923 | Olf93    | 0.018084869 | 0.496448901 | down |
| ASMM9PARTA019886 | Mup21    | 0.000295    | 0.373076599 | down |
| ASMM9PARTA040373 | Olf539   | 0.024491915 | 0.29818416  | down |
| ASMM9PARTA039238 | Defb15   | 0.03907171  | 0.43839704  | down |
| ASMM9PARTA041571 | Mtrr     | 0.04318515  | 0.413983022 | down |
| ASMM9PARTA021890 | Gm5840   | 0.0000015   | 0.434904514 | down |
| ASMM9PARTA022363 | Slc43a1  | 0.009281529 | 0.467371248 | down |
| ASMM9PARTA029412 | Casq1    | 0.003831348 | 0.372077573 | down |
| ASMM9PARTA044103 | Tcte3    | 0.0000177   | 0.499021967 | down |
| ASMM9PARTA038973 | Krba1    | 0.043957543 | 0.489913418 | down |
| ASMM9PARTA023494 | Wtap     | 2.51E-09    | 0.03257547  | down |
| ASMM9PARTA028182 | Gbp4     | 0.000146    | 0.466836888 | down |
| ASMM9PARTA044258 | Ugt1a1   | 0.01841505  | 0.497798883 | down |
| ASMM9PARTA028739 | Cxcl5    | 0.000019    | 0.439534937 | down |
| ASMM9PARTA028990 | Slc22a1  | 0.001466898 | 0.407867037 | down |
| ASMM9PARTA020230 | Olf735   | 0.00312468  | 0.339033515 | down |
| ASMM9PARTA042640 | Mael     | 0.0000535   | 0.284174829 | down |
| ASMM9PARTA037449 | Sucnr1   | 0.005230612 | 0.398387757 | down |
| ASMM9PARTA037317 | Slamf9   | 0.00411922  | 0.458642845 | down |
| ASMM9PARTA032949 | Fgf21    | 0.03266398  | 0.338274303 | down |
| ASMM9PARTA039642 | Oas1f    | 0.003327265 | 0.388701338 | down |
| ASMM9PARTA020403 | Mup20    | 0.00000871  | 0.179218166 | down |
| ASMM9PARTA025706 | Trim45   | 0.001484939 | 0.294947177 | down |
| ASMM9PARTA033936 | Lima1    | 0.021833094 | 0.326472386 | down |
| ASMM9PARTA027638 | H2-Oa    | 0.020186478 | 0.331940114 | down |
| ASMM9PARTA024623 | Ptprr    | 0.04364813  | 0.291228404 | down |
| ASMM9PARTA026872 | Olf612   | 0.04388193  | 0.480877197 | down |
| ASMM9PARTA039413 | Cdca7l   | 0.019246167 | 0.240967032 | down |
| ASMM9PARTA040040 | Olf1128  | 0.001876537 | 0.469298537 | down |
| ASMM9PARTA029837 | Cyp1a2   | 0.005328262 | 0.225261774 | down |
| ASMM9PARTA029700 | Usp17l5  | 0.014676004 | 0.228703564 | down |
| ASMM9PARTA029143 | Tjp1     | 0.030617232 | 0.45184729  | down |
| ASMM9PARTA021821 | Med1     | 0.0000362   | 0.035075464 | down |
| ASMM9PARTA030909 | S100a5   | 0.0000222   | 0.383845081 | down |
| ASMM9PARTA033209 | Kcne4    | 0.0000232   | 0.452225435 | down |
| ASMM9PARTA040512 | Olf143   | 0.035938114 | 0.45752     | down |
| ASMM9PARTA035615 | Krt5     | 0.034227073 | 0.198899541 | down |
| ASMM9PARTA042746 | H2-M10.5 | 0.031519182 | 0.32006893  | down |
| ASMM9PARTA031976 | Sgk2     | 0.002140392 | 0.420618606 | down |
| ASMM9PARTA034177 | Aptx     | 0.007547147 | 0.383610399 | down |
| ASMM9PARTA032496 | Ear7     | 0.001177595 | 0.16413272  | down |
| ASMM9PARTA030415 | Pdcd11   | 0.027891582 | 0.292071327 | down |
| ASMM9PARTA027690 | Ear2     | 0.000011    | 0.344345182 | down |
| ASMM9PARTA038827 | Fgg      | 0.00000164  | 0.235870235 | down |
| ASMM9PARTA038122 | Fkbp6    | 0.000815    | 0.40510671  | down |
| ASMM9PARTA021314 | Timm8a2  | 0.021009866 | 0.385281507 | down |
| ASMM9PARTA021733 | Cabyr    | 0.03140675  | 0.415820576 | down |

|                      |               |             |             |      |
|----------------------|---------------|-------------|-------------|------|
| ASMM9PARTA024983     | Cd97          | 0.020184014 | 0.480554968 | down |
| ASMM9PARTA028309     | Hlx           | 0.004340222 | 0.289374501 | down |
| ASMM9PARTA020568     | Dpcri         | 0.00650527  | 0.406224992 | down |
| ASMM9PARTA034826     | 1300014I06Rik | 0.000457    | 0.348980405 | down |
| ASMM9PARTA019555     | Tas2r144      | 0.003786296 | 0.482533913 | down |
| ASMM9PARTA033359     | Bcmol         | 0.007272051 | 0.476240073 | down |
| ASMM9PARTA024534     | Cox7a2l       | 0.005117261 | 0.454848404 | down |
| ASMM9PARTA024981     | Mupl          | 0.00000655  | 0.196297407 | down |
| ASMM9PARTA021726     | C030030A07Rik | 0.000000743 | 0.015542968 | down |
| ASMM9PARTA038214     | Ftcd          | 0.001814448 | 0.375157238 | down |
| ASMM9PARTA038130     | Earl0         | 0.0000932   | 0.420623507 | down |
| ASMM9PARTA029005     | Uox           | 0.004563299 | 0.368850256 | down |
| ASMM9PARTA032311     | Sult1d1       | 0.044592243 | 0.467944448 | down |
| ASMM9PARTA035887     | Cage1         | 0.030652452 | 0.299472748 | down |
| ASMM9PARTA033853     | Pde6h         | 0.0000885   | 0.21165468  | down |
| ASMM9PARTA032344     | Agxt          | 0.000188    | 0.36290538  | down |
| ASMM9PARTA029204     | Serpina1a     | 0.000000696 | 0.210762947 | down |
| ASMM9PARTA039245     | Ccdc21        | 0.002202333 | 0.233532006 | down |
| ASMM9PARTA037688     | Fcrls         | 0.00000356  | 0.436056348 | down |
| ASMM9PARTA038898     | Il33          | 0.0000442   | 0.481873927 | down |
| ASMM9PARTA039789     | Cyp2c70       | 0.00587522  | 0.375815407 | down |
| ASMM9PARTA040805     | Prss44        | 0.005634246 | 0.454226567 | down |
| ASMM9PARTA028427     | Klra2         | 0.001272043 | 0.339439372 | down |
| ASMM9PARTA043975     | Ccdc67        | 0.04441505  | 0.393162464 | down |
| ASMM9PARTA033242     | Ucn           | 0.000166    | 0.442268894 | down |
| ASMM9PARTA027943     | Cyp2a5        | 0.003612638 | 0.385093389 | down |
| ASMM9PARTA037198     | Slx1l         | 0.001041755 | 0.325590498 | down |
| ASMM9PARTA040203     | Olfr1123      | 0.028200556 | 0.389539038 | down |
| ASMM9PARTA035442     | 1700113I22Rik | 0.020701    | 0.49252917  | down |
| ASMM9PARTA030563     | Pax7          | 0.001276516 | 0.486153616 | down |
| ASMM9PARTA022057     | Ccdc90a       | 0.0000444   | 0.384906655 | down |
| ASMM9PARTA041030     | Cpz           | 0.001890815 | 0.431117027 | down |
| ASMM9PARTA040989     | Acat3         | 0.000022    | 0.43168495  | down |
| ASMM9PARTA029669     | Lefty1        | 0.000108    | 0.480737497 | down |
| CUST_292_PI426409190 | Gm13298       | 0.0000235   | 0.481452407 | down |
| ASMM9PARTA026243     | Dnase1l1      | 0.006113933 | 0.492197004 | down |
| ASMM9PARTA029989     | Gbx2          | 0.00000594  | 0.287773618 | down |
| ASMM9PARTA023550     | Slc9a5        | 0.03002272  | 0.46258204  | down |
