# Supplementary material for: Microarray Profile of Long Noncoding RNA and Messenger RNA Expression in a Model of Alzheimer’s Disease
Source: MDPI journal article supplement (doi:10.3390/life10050064), 2020-05-14
Supplement: s1 [file s1]

# Supplementary

## Microarray Profile of Long Noncoding RNA and Messenger RNA Expression in a Model of Alzheimer's Disease

Linlin Wang <sup>†</sup>, Li Zeng <sup>†</sup>, Hailun Jiang, Zhuorong Li <sup>\*</sup> and Rui Liu <sup>\*</sup>

Institute of Medicinal Biotechnology, Chinese Academy of Medical Sciences and Peking Union Medical College, Beijing 100050, China; wanglinlin@wfmc.edu.cn (L.W.); zengsheng@imb.pumc.edu.cn (L.Z.); jianghailun@imb.pumc.edu.cn (H.J.)

<sup>\*</sup> Correspondence: lizhourong@imb.pumc.edu.cn (Z.L.); +86-10-8352017; .liurui@imb.pumc.edu.cn (R.L.); Tel.: +86-10-67087731

**Table S2.** Differently expressed lncRNAs in the brain of 3-month-old APP/PS1 mice compared with age-matched WT mice.

| Probe Name              | Gene Symbol      | p-Value     | Fold Change | Regulation |
|-------------------------|------------------|-------------|-------------|------------|
| ASMM9PARTA006853        |                  | 0.000201    | 28.02498    | up         |
| ASMM9PARTA047480        | BC075635         | 0.035933297 | 2.031355    | up         |
| ASMM9PARTA051288        | 4933434I20Rik    | 0.009978537 | 2.0194137   | up         |
| CJ228476 P1             | humanlincRNA1040 | 0.040220477 | 2.0302415   | up         |
| MM9LINCRNAEXON10451+ P1 | mouselincRNA1286 | 0.002579583 | 2.456823    | up         |
| MM9LINCRNAEXON10482- P1 |                  | 0.000712    | 3.868857    | up         |
| ASMM9PARTA014628        | Gm12940          | 0.0000735   | 3.5512953   | up         |
| mouselincRNA0294- P1    | mouselincRNA0294 | 0.018257162 | 2.6640735   | up         |
| humanlincRNA1590+ P1    | humanlincRNA1590 | 0.0000642   | 4.6550817   | up         |
| ASMM9PARTA046759        | AK039862         | 0.000282    | 10.566481   | up         |
| ASMM9PARTA016398        | 4632427E13Rik    | 0.003185133 | 2.1290658   | up         |
| ASMM9PARTA016545        | Gm16706          | 0.028662696 | 2.2541282   | up         |
| ASMM9PARTA016545        | Gm16706          | 0.028662696 | 2.2541282   | up         |
| ASMM9PARTA008337        |                  | 0.008436107 | 2.0281687   | up         |
| ASMM9PARTA005648        |                  | 0.008224883 | 2.336319    | up         |
| ASMM9PARTA012922        | Gm13153          | 0.000539    | 2.218174    | up         |
| ASMM9PARTA012922        | Gm13153          | 0.000539    | 2.218174    | up         |
| ASMM9PARTA012922        | Gm13153          | 0.000539    | 2.218174    | up         |
| ASMM9PARTA012176        | Gm15719          | 0.02269258  | 2.4400444   | up         |
| mouselincRNA0394- P1    | mouselincRNA0394 | 0.001435107 | 3.2710023   | up         |
| ASMM9PARTA050284        | Gak              | 0.005066246 | 2.3687022   | up         |
| ASMM9PARTA046970        | BC006965         | 0.00988696  | 3.1420465   | up         |
| ASMM9PARTA045330        | Gm11149          | 0.003619997 | 2.375882    | up         |
| ASMM9PARTA045330        | Gm11149          | 0.003619997 | 2.375882    | up         |
| ASMM9PARTA045330        | Gm11149          | 0.003619997 | 2.375882    | up         |
| CA465684 P1             | mouselincRNA0967 | 0.000124    | 3.5200474   | up         |
| ASMM9PARTA004295        |                  | 0.000887    | 3.888033    | up         |
| ASMM9PARTA048352        | AK013372         | 0.044562105 | 2.4789171   | up         |
| ASMM9PARTA003398        |                  | 0.006502184 | 2.127753    | up         |
| ASMM9PARTA018592        | Gm16343          | 0.02400128  | 2.7728627   | up         |
| ASMM9PARTA018592        | Gm16343          | 0.02400128  | 2.7728627   | up         |

|                         |                  |             |           |    |
|-------------------------|------------------|-------------|-----------|----|
| ASMM9PARTA018592        | Gm16343          | 0.02400128  | 2.7728627 | up |
| ASMM9PARTA018592        | Gm16343          | 0.02400128  | 2.7728627 | up |
| ASMM9PARTA007995        |                  | 0.000164    | 2.0518236 | up |
| ASMM9PARTA013083        | Gm12539          | 0.000000125 | 2.2940176 | up |
| ASMM9PARTA003991        |                  | 0.015835704 | 2.2564034 | up |
| ASMM9PARTA001575        |                  | 0.026314057 | 2.788662  | up |
| ASMM9PARTA013061        | Gm13913          | 0.00000275  | 5.738725  | up |
| ASMM9PARTA051639        | Fxy              | 0.000000031 | 32.739185 | up |
| ASMM9PARTA051639        | Fxy              | 0.000000031 | 32.739185 | up |
| ASMM9PARTA004379        |                  | 0.041796762 | 2.4507213 | up |
| ASMM9PARTA005351        |                  | 0.000172    | 2.3210182 | up |
| MM9LINCRNAEXON11103- P1 | mouselincRNA0821 | 0.000533    | 2.4097216 | up |
| ASMM9PARTA049439        | mKIAA1125        | 0.016850177 | 2.4635985 | up |
| ASMM9PARTA003621        |                  | 0.019347534 | 3.077017  | up |
| ASMM9PARTA051477        | AK028224         | 0.000000587 | 2.7877867 | up |
| ASMM9PARTA048047        | Pigz             | 0.000636    | 2.181859  | up |
| ASMM9PARTA011710        | Gm13689          | 0.017739022 | 9.814646  | up |
| ASMM9PARTA050830        | AK081140         | 0.0000141   | 2.7990656 | up |
| ASMM9PARTA050830        | AK081140         | 0.0000141   | 2.7990656 | up |
| ASMM9PARTA050830        | AK081140         | 0.0000141   | 2.7990656 | up |
| ASMM9PARTA047940        | AK014435         | 0.00017     | 6.3723054 | up |
| ASMM9PARTA005824        |                  | 0.018023334 | 3.3533084 | up |
| ASMM9PARTA006453        |                  | 0.000836    | 3.3330455 | up |
| ASMM9PARTA003773        |                  | 0.000316    | 3.0333865 | up |
| ASMM9PARTA013174        | Gm11645          | 0.001008383 | 2.66276   | up |
| ASMM9PARTA010558        | Xlr5d-ps         | 0.01289542  | 4.388562  | up |
| ASMM9PARTA010441        | Gm15560          | 0.000201    | 2.4514873 | up |
| ASMM9PARTA046107        | AK039957         | 0.0425243   | 2.4415624 | up |
| ASMM9PARTA002609        |                  | 0.020581115 | 2.037375  | up |
| ASMM9PARTA046534        | AK005214         | 0.000213    | 2.0863976 | up |
| ASMM9PARTA016451        | 2810008D09Rik    | 0.000004    | 2.9708154 | up |
| ASMM9PARTA048537        | NR_002853        | 0.00000167  | 5.235411  | up |
| BI107540 P1             | mouselincRNA1064 | 0.010709045 | 2.2569528 | up |
| ASMM9PARTA007417        |                  | 0.032403223 | 2.987935  | up |
| ASMM9PARTA047800        | AK145614         | 0.0000712   | 2.375798  | up |
| ASMM9PARTA013040        | Gm13577          | 0.0000603   | 2.6024327 | up |
| ASMM9PARTA007811        |                  | 0.000215    | 2.0386467 | up |
| ASMM9PARTA003806        |                  | 0.0000348   | 2.0197408 | up |
| ASMM9PARTA003377        |                  | 0.002833969 | 3.1438978 | up |
| ASMM9PARTA010114        | Gm11041          | 0.001024195 | 3.0102236 | up |
| DV051927 P1             | mouselincRNA0186 | 0.000917    | 2.2757103 | up |
| MM9LINCRNAEXON10459+ P1 | mouselincRNA1289 | 0.03823436  | 2.1349344 | up |
| ASMM9PARTA011188        | Hmgb1-ps4        | 0.0000916   | 2.662592  | up |
| ASMM9PARTA046284        | AK036470         | 0.001845743 | 2.6669564 | up |
| ASMM9PARTA019893        |                  | 0.029229416 | 2.773302  | up |
| BI180507 P1             | mouselincRNA1445 | 0.02127676  | 4.2447176 | up |
| ASMM9PARTA013980        | 2810403D21Rik    | 0.018716123 | 2.7028453 | up |
| humanlincRNA0409- P1    | humanlincRNA0409 | 0.025608456 | 2.139139  | up |
| ASMM9PARTA015426        | Gm14092          | 0.023995245 | 2.5788743 | up |
| ASMM9PARTA015426        | Gm14092          | 0.023995245 | 2.5788743 | up |
| MM9LINCRNAEXON10775+ P1 | mouselincRNA1143 | 0.000746    | 2.4562912 | up |
| ASMM9PARTA046039        | LOC100415784     | 0.010484707 | 2.6013057 | up |
| ASMM9PARTA008433        |                  | 0.03190274  | 3.5405626 | up |
| ASMM9PARTA008687        |                  | 0.048377767 | 2.1047337 | up |
| ASMM9PARTA005626        |                  | 0.03985472  | 2.751476  | up |
| ASMM9PARTA013524        | Gm16407          | 0.010861034 | 2.033524  | up |
| ASMM9PARTA005747        |                  | 0.000158    | 2.4484985 | up |

|                         |                  |             |           |    |
|-------------------------|------------------|-------------|-----------|----|
| ASMM9PARTA012161        | Gm13239          | 0.0000698   | 2.0747144 | up |
| MM9LINCRNAEXON11597- P1 | mouselincRNA0422 | 0.000128    | 2.4034324 | up |
| ASMM9PARTA046040        | 4931406H21Rik    | 0.001222916 | 3.587823  | up |
| MM9LINCRNAEXON11375- P1 | mouselincRNA0587 | 0.0000309   | 2.5215328 | up |
| ASMM9PARTA006147        |                  | 0.00110766  | 3.3976183 | up |
| ASMM9PARTA014539        | Gm16095          | 0.032567773 | 3.56036   | up |
| MM9LINCRNAEXON10335+ P1 | mouselincRNA1390 | 0.0367432   | 2.5335274 | up |
| ASMM9PARTA005761        |                  | 0.0000957   | 3.036182  | up |
| ASMM9PARTA019063        | AC125279.2       | 0.000576    | 2.6485398 | up |
| ASMM9PARTA017049        | Gm2694           | 0.00041     | 6.694751  | up |
| CUST 909 PI426073487    | uc.430           | 0.002456055 | 2.7067525 | up |
| CUST 909 PI426073487    | uc.430           | 0.002456055 | 2.7067525 | up |
| CUST 909 PI426073487    | uc.430           | 0.002456055 | 2.7067525 | up |
| CUST 909 PI426073487    | uc.430           | 0.002456055 | 2.7067525 | up |
| CUST 909 PI426073487    | uc.430           | 0.002456055 | 2.7067525 | up |
| ASMM9PARTA014015        | Gm13793          | 0.028507689 | 2.1264756 | up |
| ASMM9PARTA006865        |                  | 0.000000351 | 5.233165  | up |
| ASMM9PARTA013293        | Gm14237          | 0.03541867  | 2.0105338 | up |
| ASMM9PARTA005238        |                  | 0.000173    | 4.28692   | up |
| ASMM9PARTA002704        |                  | 0.000651    | 2.0285163 | up |
| ASMM9PARTA011300        | Gm9078           | 0.000000761 | 2.2853441 | up |
| ASMM9PARTA011532        | Gm14627          | 0.016236996 | 3.8309026 | up |
| ASMM9PARTA001200        |                  | 0.017641718 | 2.142461  | up |
| CUST 580 PI426073487    | uc.101           | 0.000126    | 2.6631348 | up |
| CUST 580 PI426073487    | uc.101           | 0.000126    | 2.6631348 | up |
| ASMM9PARTA044891        | 1700108J01Rik    | 0.000166    | 2.864782  | up |
| CUST 453 PI426073487    | uc.455           | 0.004614567 | 2.5171196 | up |
| ASMM9PARTA046659        | 4933439F18Rik    | 0.001098361 | 2.8961835 | up |
| ASMM9PARTA046659        | 4933439F18Rik    | 0.001098361 | 2.8961835 | up |
| ASMM9PARTA006637        |                  | 0.04772968  | 2.5070615 | up |
| ASMM9PARTA006637        |                  | 0.04772968  | 2.5070615 | up |
| ASMM9PARTA006637        |                  | 0.04772968  | 2.5070615 | up |
| ASMM9PARTA048810        | AK042686         | 0.000011    | 2.6402147 | up |
| ASMM9PARTA051750        | Smpx             | 0.00371115  | 5.275266  | up |
| ASMM9PARTA046321        | Pde7b            | 0.0000731   | 2.1502957 | up |
| ASMM9PARTA014438        | Pisd-ps2         | 0.0000128   | 4.6784444 | up |
| humanlincRNA0170- P1    | humanlincRNA0170 | 0.0000126   | 3.417167  | up |
| ASMM9PARTA004940        |                  | 0.017105231 | 10.639719 | up |
| ASMM9PARTA003714        |                  | 0.0000822   | 2.0025506 | up |
| ASMM9PARTA006224        |                  | 0.003340893 | 2.4044788 | up |
| ASMM9PARTA006230        |                  | 0.006936705 | 2.1423283 | up |
| ASMM9PARTA004414        |                  | 0.043111637 | 2.557581  | up |
| ASMM9PARTA048835        | notch1           | 0.035429593 | 2.5399373 | up |
| ASMM9PARTA002107        |                  | 0.003513236 | 3.2391667 | up |
| ASMM9PARTA003242        |                  | 0.0000765   | 5.0079494 | up |
| ASMM9PARTA006070        |                  | 0.004084174 | 3.3641777 | up |
| ASMM9PARTA049104        | Caper            | 0.000143    | 2.037399  | up |
| ASMM9PARTA000913        |                  | 0.035069387 | 2.2505288 | up |
| ASMM9PARTA004587        |                  | 0.026349595 | 2.137127  | up |
| ASMM9PARTA014282        | Gm15991          | 0.024864864 | 2.0553732 | up |
| ASMM9PARTA005146        |                  | 0.003754153 | 2.4023252 | up |
| ASMM9PARTA016609        | 9530027J09Rik    | 0.046474524 | 2.3144073 | up |
| ASMM9PARTA046608        | Mifl             | 0.000101    | 3.7655482 | up |
| ASMM9PARTA014753        | Gm12603          | 0.030143302 | 3.1725302 | up |
| MM9LINCRNAEXON11571+ P1 | mouselincRNA0391 | 0.001430225 | 4.6859727 | up |
| ASMM9PARTA003751        |                  | 0.0000127   | 2.8992462 | up |
| MM9LINCRNAEXON10848+ P1 | mouselincRNA0988 | 0.00841801  | 4.0725727 | up |

[illegible]

|                         |                 |             |             |             |           |    |
|-------------------------|-----------------|-------------|-------------|-------------|-----------|----|
| BI108441 P1             | mouse           | lincRNA0637 | 0.002379217 | 2.123651    | up        |    |
| BI108441 P1             | mouse           | lincRNA0637 | 0.002379217 | 2.123651    | up        |    |
| BI108441 P1             | mouse           | lincRNA0637 | 0.002379217 | 2.123651    | up        |    |
| ASMM9PARTA014781        | Gm16201         |             | 0.009322906 | 6.104802    | up        |    |
| ASMM9PARTA002895        |                 |             | 0.000157    | 2.264759    | up        |    |
| ASMM9PARTA016945        | A230056P14Rik   |             | 0.0000557   | 2.1729      | up        |    |
| MM9LINCRNAEXON11978+ P1 | mouse           | lincRNA0222 | 0.003396192 | 2.076546    | up        |    |
| MM9LINCRNAEXON11855- P1 |                 |             | 0.006603306 | 2.9693842   | up        |    |
| MM9LINCRNAEXON11855- P1 |                 |             | 0.006603306 | 2.9693842   | up        |    |
| MM9LINCRNAEXON11855- P1 |                 |             | 0.006603306 | 2.9693842   | up        |    |
| ASMM9PARTA008934        |                 |             | 0.020554073 | 2.2058582   | up        |    |
| ASMM9PARTA017917        | Gm16143         |             | 0.000258    | 5.1132674   | up        |    |
| mouse                   | lincRNA0627- P1 | mouse       | lincRNA0627 | 0.011872051 | 2.291906  | up |
| ASMM9PARTA012091        | Gm12262         |             | 0.000499    | 3.8495035   | up        |    |
| human                   | lincRNA0574+ P1 | human       | lincRNA0574 | 0.003752235 | 3.301639  | up |
| ASMM9PARTA008094        |                 |             | 0.044795886 | 3.183368    | up        |    |
| ASMM9PARTA046956        | AK163075        |             | 0.000102    | 3.097045    | up        |    |
| mouse                   | lincRNA1231- P1 | mouse       | lincRNA1231 | 0.006379338 | 2.4360187 | up |
| MM9LINCRNAEXON11228- P1 | mouse           | lincRNA0717 | 0.014125631 | 2.849154    | up        |    |
| ASMM9PARTA004601        |                 |             | 0.003045624 | 2.6471167   | up        |    |
| ASMM9PARTA009446        | Mageb16-ps2     |             | 0.016874    | 2.0087073   | up        |    |
| ASMM9PARTA009446        | Mageb16-ps2     |             | 0.016874    | 2.0087073   | up        |    |
| MM9LINCRNAEXON11546- P1 | mouse           | lincRNA0380 | 0.007522167 | 2.2332575   | up        |    |
| MM9LINCRNAEXON10673+ P1 | mouse           | lincRNA1108 | 0.036223482 | 2.458636    | up        |    |
| ASMM9PARTA015200        | 1700081H22Rik   |             | 0.027703231 | 2.4271917   | up        |    |
| ASMM9PARTA012726        | Gm5645          |             | 0.043349586 | 2.5988264   | up        |    |
| ASMM9PARTA007145        |                 |             | 0.044273324 | 2.0477214   | up        |    |
| ASMM9PARTA010111        | Gm10977         |             | 0.0000293   | 2.9272864   | up        |    |
| ASMM9PARTA004199        |                 |             | 0.03758711  | 2.1414397   | up        |    |
| ASMM9PARTA047973        | Senp7           |             | 0.022190634 | 2.3485007   | up        |    |
| ASMM9PARTA047973        | Senp7           |             | 0.022190634 | 2.3485007   | up        |    |
| ASMM9PARTA047973        | Senp7           |             | 0.022190634 | 2.3485007   | up        |    |
| ASMM9PARTA047973        | Senp7           |             | 0.022190634 | 2.3485007   | up        |    |
| ASMM9PARTA013547        | Gm13656         |             | 0.012281641 | 2.0847113   | up        |    |
| ASMM9PARTA015619        | Gm16201         |             | 0.00000441  | 2.076095    | up        |    |
| ASMM9PARTA015619        | Gm16201         |             | 0.00000441  | 2.076095    | up        |    |
| ASMM9PARTA003655        |                 |             | 0.0000218   | 2.4161873   | up        |    |
| MM9LINCRNAEXON11494- P1 |                 |             | 0.008357966 | 2.6027863   | up        |    |
| ASMM9PARTA006650        |                 |             | 0.03521108  | 2.344825    | up        |    |
| ASMM9PARTA016400        | Gm12204         |             | 0.009661051 | 2.626455    | up        |    |
| ASMM9PARTA006996        |                 |             | 0.000166    | 3.5157826   | up        |    |
| ASMM9PARTA003216        |                 |             | 0.0000564   | 2.098189    | up        |    |
| ASMM9PARTA008655        |                 |             | 0.000939    | 7.163107    | up        |    |
| ASMM9PARTA008655        |                 |             | 0.000939    | 7.163107    | up        |    |
| ASMM9PARTA008655        |                 |             | 0.000939    | 7.163107    | up        |    |
| ASMM9PARTA003440        |                 |             | 0.0000109   | 3.1455529   | up        |    |
| MM9LINCRNAEXON10837+ P1 | mouse           | lincRNA0984 | 0.043724947 | 3.4329667   | up        |    |
| ASMM9PARTA001481        |                 |             | 0.018752499 | 2.160191    | up        |    |
| ASMM9PARTA012145        | Gm11830         |             | 0.00054     | 2.6202261   | up        |    |
| AV570450 P1             | human           | lincRNA0329 | 0.0000175   | 2.737319    | up        |    |
| ASMM9PARTA005435        |                 |             | 0.000000103 | 8.464946    | up        |    |
| ASMM9PARTA048214        | AK170928        |             | 0.0002      | 3.4664276   | up        |    |
| ASMM9PARTA048214        | AK170928        |             | 0.0002      | 3.4664276   | up        |    |
| ASMM9PARTA048214        | AK170928        |             | 0.0002      | 3.4664276   | up        |    |
| ASMM9PARTA000460        |                 |             | 0.003875399 | 2.395071    | up        |    |
| ASMM9PARTA010117        | Olfr833-ps1     |             | 0.006457352 | 2.093858    | up        |    |
| ASMM9PARTA013449        | Gm15052         |             | 0.014026786 | 2.614133    | up        |    |

|                         |                 |             |           |    |
|-------------------------|-----------------|-------------|-----------|----|
| ASMM9PARTA015078        | Gm15050         | 0.044956733 | 2.340066  | up |
| MM9LINCRNAEXON11234- P1 | mouseincRNA0719 | 0.013766194 | 2.6233292 | up |
| BE691366 P1             | mouseincRNA0319 | 0.000189    | 2.3660378 | up |
| MM9LINCRNAEXON11619+ P1 | mouseincRNA0430 | 0.00008     | 2.308619  | up |
| ASMM9PARTA011435        | Gm11877         | 0.000515    | 2.6916611 | up |
| CUST 72 PI426409190     | Gm13155         | 0.00000594  | 2.5891275 | up |
| ASMM9PARTA019336        | AC132234.1      | 0.000000382 | 4.485177  | up |
| MM9LINCRNAEXON11460- P1 | mouseincRNA0481 | 0.000181    | 2.0892007 | up |
| ASMM9PARTA018622        | Gm16110         | 0.045262147 | 2.7501729 | up |
| ASMM9PARTA003470        |                 | 0.000099    | 3.4856825 | up |
| ASMM9PARTA002195        |                 | 0.014832666 | 2.0956483 | up |
| ASMM9PARTA002066        |                 | 0.028386137 | 2.4190736 | up |
| ASMM9PARTA001716        |                 | 0.013537709 | 2.5782273 | up |
| ASMM9PARTA003484        |                 | 0.00000945  | 2.0131752 | up |
| ASMM9PARTA045654        | 1700069L16Rik   | 0.018702513 | 2.1981976 | up |
| ASMM9PARTA003674        |                 | 0.03600639  | 2.4271142 | up |
| ASMM9PARTA004306        |                 | 0.04805554  | 2.3787801 | up |
| ASMM9PARTA000626        |                 | 0.01748408  | 2.102359  | up |
| ASMM9PARTA011989        | Gm13170         | 0.0000835   | 2.18883   | up |
| ASMM9PARTA011989        | Gm13170         | 0.0000835   | 2.18883   | up |
| MM9LINCRNAEXON11063+ P1 | mouseincRNA0809 | 0.012436418 | 3.5161963 | up |
| ASMM9PARTA005235        |                 | 0.001182655 | 3.184923  | up |
| ASMM9PARTA005235        |                 | 0.001182655 | 3.184923  | up |
| ASMM9PARTA005235        |                 | 0.001182655 | 3.184923  | up |
| ASMM9PARTA015476        | Hoxa11as        | 0.0000583   | 3.0729964 | up |
| ASMM9PARTA012488        | Gm11283         | 0.004371232 | 4.44906   | up |
| ASMM9PARTA005058        |                 | 0.000337    | 2.3116035 | up |
| CJ067790 P1             | humanincRNA2277 | 0.040010467 | 2.1346138 | up |
| ASMM9PARTA050768        | AK020061        | 0.03546323  | 2.800051  | up |
| ASMM9PARTA049866        | AK052888        | 0.010720461 | 2.1673434 | up |
| mouseincRNA0238- P1     | mouseincRNA0238 | 0.000153    | 2.3517025 | up |
| ASMM9PARTA012701        | AA413626        | 0.001630186 | 2.1547787 | up |
| ASMM9PARTA045090        | Defa-ps1        | 0.023542585 | 2.3300216 | up |
| ASMM9PARTA002051        |                 | 0.0000157   | 7.7211747 | up |
| ASMM9PARTA006154        |                 | 0.0000728   | 2.181867  | up |
| ASMM9PARTA019549        | 9930038B18Rik   | 0.027896596 | 2.2347085 | up |
| ASMM9PARTA017474        | 0610009B14Rik   | 0.000603    | 4.0031505 | up |
| ASMM9PARTA000388        |                 | 0.000199    | 2.4585037 | up |
| ASMM9PARTA010884        | Gm15709         | 0.004452877 | 2.0239234 | up |
| ASMM9PARTA005191        |                 | 0.000000924 | 5.7952065 | up |
| ASMM9PARTA050583        | AK085986        | 0.005123622 | 2.3558533 | up |
| AI503337 P1             | mouseincRNA0302 | 0.001020711 | 4.2963243 | up |
| MM9LINCRNAEXON11740- P1 | mouseincRNA0227 | 0.03587346  | 2.8577254 | up |
| BY568487 P1             | humanincRNA0565 | 0.04374709  | 2.4912837 | up |
| ASMM9PARTA044984        | Dio3os          | 0.0042765   | 2.76891   | up |
| ASMM9PARTA018081        | Airn            | 0.01318755  | 2.7345448 | up |
| ASMM9PARTA016368        | Gm15958         | 0.014977548 | 3.0862184 | up |
| ASMM9PARTA002292        |                 | 0.022137187 | 2.0757802 | up |
| MM9LINCRNAEXON10629+ P1 | mouseincRNA1245 | 0.03437413  | 2.3566105 | up |
| ASMM9PARTA009332        | 4930463O16Rik   | 0.031841278 | 2.083905  | up |
| ASMM9PARTA001680        |                 | 0.03233562  | 2.1490126 | up |
| ASMM9PARTA003081        |                 | 0.027165085 | 3.1705647 | up |
| ASMM9PARTA005944        |                 | 0.002503568 | 2.0024552 | up |
| MM9LINCRNAEXON10769- P1 | mouseincRNA1141 | 0.04111953  | 2.0597034 | up |
| ASMM9PARTA017209        | Gm4755          | 0.000295    | 2.7423983 | up |
| mouseincRNA0342+ P1     | mouseincRNA0342 | 0.024407785 | 3.2423823 | up |
| ASMM9PARTA018923        | AL732527.1      | 0.013862874 | 4.9024773 | up |

|                         |                  |             |           |    |
|-------------------------|------------------|-------------|-----------|----|
| ASMM9PARTA048531        | NR 003519        | 0.0000706   | 3.1228685 | up |
| ASMM9PARTA005255        |                  | 0.002170519 | 2.0907397 | up |
| ASMM9PARTA006989        |                  | 0.025893586 | 2.0403616 | up |
| ASMM9PARTA000869        |                  | 0.01575989  | 3.2248693 | up |
| ASMM9PARTA007855        |                  | 0.005455921 | 3.4755526 | up |
| ASMM9PARTA018758        | Gm6413           | 0.0000551   | 2.3117208 | up |
| ASMM9PARTA048894        | AK085760         | 0.001428144 | 2.894351  | up |
| MM9LINCRNAEXON11779- P1 | mouselincRNA0246 | 0.000000196 | 2.587728  | up |
| MM9LINCRNAEXON11845+ P1 | mouselincRNA0275 | 0.002915741 | 3.8656807 | up |
| ASMM9PARTA017125        | Gm16952          | 0.002141229 | 2.265149  | up |
| ASMM9PARTA017125        | Gm16952          | 0.002141229 | 2.265149  | up |
| ASMM9PARTA017125        | Gm16952          | 0.002141229 | 2.265149  | up |
| ASMM9PARTA017125        | Gm16952          | 0.002141229 | 2.265149  | up |
| ASMM9PARTA019316        | Gm11010          | 0.00000946  | 2.2463148 | up |
| ASMM9PARTA010409        | 5730446D14Rik    | 0.041413274 | 2.7933743 | up |
| ASMM9PARTA004299        |                  | 0.000685    | 5.0032954 | up |
| ASMM9PARTA007731        |                  | 0.000232    | 2.3440502 | up |
| ASMM9PARTA001349        |                  | 0.0000454   | 2.3884733 | up |
| ASMM9PARTA016541        | Zfp133-ps        | 0.003890402 | 4.361934  | up |
| ASMM9PARTA006553        |                  | 0.02260813  | 2.7823277 | up |
| ASMM9PARTA003726        |                  | 0.009176646 | 4.618068  | up |
| ASMM9PARTA012608        | Gm13574          | 0.01647377  | 2.2820442 | up |
| ASMM9PARTA015212        | Gm16548          | 0.018230565 | 2.9374247 | up |
| ASMM9PARTA015212        | Gm16548          | 0.018230565 | 2.9374247 | up |
| ASMM9PARTA017761        | Gm5432           | 0.013280321 | 2.371175  | up |
| ASMM9PARTA050128        | AK019745         | 0.021588406 | 2.8310044 | up |
| ASMM9PARTA010177        | Gm6973           | 0.008229041 | 5.5513196 | up |
| ASMM9PARTA049540        | AK076817         | 0.03513201  | 2.2847736 | up |
| ASMM9PARTA002531        |                  | 0.000397    | 2.3821747 | up |
| humanlincRNA2366+ P1    | humanlincRNA2366 | 0.005269527 | 2.6376154 | up |
| ASMM9PARTA005275        |                  | 0.012955572 | 2.2008467 | up |
| ASMM9PARTA045805        | Srsf9            | 0.0000432   | 2.59727   | up |
| ASMM9PARTA045163        | Asb7             | 0.03463487  | 3.2096903 | up |
| ASMM9PARTA045163        | Asb7             | 0.03463487  | 3.2096903 | up |
| ASMM9PARTA045163        | Asb7             | 0.03463487  | 3.2096903 | up |
| MM9LINCRNAEXON10684+ P1 | mouselincRNA1112 | 0.0424008   | 2.006136  | up |
| ASMM9PARTA015391        | C030037D09Rik    | 0.00000036  | 13.944588 | up |
| ASMM9PARTA015391        | C030037D09Rik    | 0.00000036  | 13.944588 | up |
| ASMM9PARTA000711        |                  | 0.01786163  | 2.4367018 | up |
| ASMM9PARTA048011        | Hnrnpa1          | 0.0000618   | 2.5927157 | up |
| ASMM9PARTA048011        | Hnrnpa1          | 0.0000618   | 2.5927157 | up |
| ASMM9PARTA048011        | Hnrnpa1          | 0.0000618   | 2.5927157 | up |
| ASMM9PARTA046655        | AK051928         | 0.016259091 | 2.2046125 | up |
| ASMM9PARTA010353        | Gm14886          | 0.034508757 | 3.5951035 | up |
| humanlincRNA1841+ P1    | humanlincRNA1841 | 0.002860075 | 4.3917775 | up |
| ASMM9PARTA009005        |                  | 0.047907405 | 2.333349  | up |
| MM9LINCRNAEXON10120- P1 | mouselincRNA1557 | 0.0226214   | 2.0646715 | up |
| ASMM9PARTA005318        |                  | 0.016437741 | 2.132883  | up |
| ASMM9PARTA018864        | AC132684.1       | 0.009493374 | 2.9903214 | up |
| ASMM9PARTA018864        | AC132684.1       | 0.009493374 | 2.9903214 | up |
| ASMM9PARTA010524        | Gm15161          | 0.049292143 | 5.663095  | up |
| ASMM9PARTA017541        | A230087F16Rik    | 0.001168542 | 2.465981  | up |
| ASMM9PARTA011284        | Gm11784          | 0.02605261  | 2.0255508 | up |
| ASMM9PARTA004317        |                  | 0.000579    | 3.0922732 | up |
| ASMM9PARTA004317        |                  | 0.000579    | 3.0922732 | up |
| ASMM9PARTA004317        |                  | 0.000579    | 3.0922732 | up |
| ASMM9PARTA051308        | AK038653         | 0.001050724 | 3.424361  | up |

|                          |                  |             |           |    |
|--------------------------|------------------|-------------|-----------|----|
| ASMM9PARTA000349         |                  | 0.04724779  | 2.1572495 | up |
| ASMM9PARTA000349         |                  | 0.04724779  | 2.1572495 | up |
| ASMM9PARTA015795         | 3110053B16Rik    | 0.001300726 | 6.3197002 | up |
| ASMM9PARTA002722         |                  | 0.0000174   | 2.1170118 | up |
| ASMM9PARTA009632         | 5830416P10Rik    | 0.000911    | 6.434741  | up |
| ASMM9PARTA048852         | AK085172         | 0.0000131   | 2.1616309 | up |
| ASMM9PARTA051637         | Fxy              | 0.014516354 | 3.745992  | up |
| ASMM9PARTA051637         | Fxy              | 0.014516354 | 3.745992  | up |
| AA265833 P1              | humanlincRNA1036 | 0.000095    | 2.1338434 | up |
| humanlincRNA1995+ P1     | humanlincRNA1995 | 0.0161522   | 2.6371143 | up |
| ASMM9PARTA019226         | Gm16759          | 0.001865016 | 4.036291  | up |
| ASMM9PARTA004423         |                  | 0.02430542  | 3.0734124 | up |
| ASMM9PARTA003841         |                  | 0.00727315  | 2.2232213 | up |
| ASMM9PARTA047266         | Rbm25            | 0.0000809   | 2.264259  | up |
| ASMM9PARTA008150         |                  | 0.028322306 | 2.390619  | up |
| ASMM9PARTA002439         |                  | 0.029382218 | 3.0561523 | up |
| ASMM9PARTA002439         |                  | 0.029382218 | 3.0561523 | up |
| ASMM9PARTA002439         |                  | 0.029382218 | 3.0561523 | up |
| ASMM9PARTA002439         |                  | 0.029382218 | 3.0561523 | up |
| ASMM9PARTA002439         |                  | 0.029382218 | 3.0561523 | up |
| ASMM9PARTA002439         |                  | 0.029382218 | 3.0561523 | up |
| ASMM9PARTA002439         |                  | 0.029382218 | 3.0561523 | up |
| ASMM9PARTA001848         |                  | 0.015368355 | 2.1348777 | up |
| ASMM9PARTA011938         | Hmgb1-ps1        | 0.000000231 | 3.0026157 | up |
| ASMM9PARTA049238         | AK029171         | 0.032021042 | 2.8493066 | up |
| ASMM9PARTA011190         | Olfr388-ps1      | 0.016305704 | 2.264089  | up |
| AA791803 P1              | mouselincRNA0980 | 0.0000302   | 2.2852154 | up |
| ASMM9PARTA003122         |                  | 0.00000655  | 6.451795  | up |
| MM9LINC RNAEXON11355- P1 | mouselincRNA0580 | 0.0000473   | 2.1077094 | up |
| ASMM9PARTA013353         | Gm15079          | 0.000185    | 2.861106  | up |
| ASMM9PARTA018405         | D030054H15Rik    | 0.015063091 | 2.4134104 | up |
| ASMM9PARTA018405         | D030054H15Rik    | 0.015063091 | 2.4134104 | up |
| ASMM9PARTA019391         | AL928605.2       | 0.008974592 | 3.0529222 | up |
| ASMM9PARTA019391         | AL928605.2       | 0.008974592 | 3.0529222 | up |
| ASMM9PARTA019391         | AL928605.2       | 0.008974592 | 3.0529222 | up |
| ASMM9PARTA019391         | AL928605.2       | 0.008974592 | 3.0529222 | up |
| ASMM9PARTA019391         | AL928605.2       | 0.008974592 | 3.0529222 | up |
| humanlincRNA0573- P1     | humanlincRNA0573 | 0.001393203 | 2.7621884 | up |
| ASMM9PARTA005817         |                  | 0.004817067 | 5.037504  | up |
| ASMM9PARTA005817         |                  | 0.004817067 | 5.037504  | up |
| ASMM9PARTA005817         |                  | 0.004817067 | 5.037504  | up |
| ASMM9PARTA005817         |                  | 0.004817067 | 5.037504  | up |
| ASMM9PARTA005817         |                  | 0.004817067 | 5.037504  | up |
| ASMM9PARTA004849         |                  | 0.00000247  | 2.4513738 | up |
| CK377992 P1              | humanlincRNA1344 | 0.014633579 | 2.450874  | up |
| ASMM9PARTA044906         | 2410002O22Rik    | 0.00000133  | 3.0086505 | up |
| ASMM9PARTA044906         | 2410002O22Rik    | 0.00000133  | 3.0086505 | up |
| ASMM9PARTA044906         | 2410002O22Rik    | 0.00000133  | 3.0086505 | up |
| ASMM9PARTA044906         | 2410002O22Rik    | 0.00000133  | 3.0086505 | up |
| MM9LINC RNAEXON10048- P1 |                  | 0.004848478 | 2.6849837 | up |
| ASMM9PARTA011011         | Gm13550          | 0.02613266  | 2.057723  | up |
| ASMM9PARTA004214         |                  | 0.00000135  | 3.7932343 | up |
| ASMM9PARTA016720         | B930086A06Rik    | 0.01631534  | 3.2284963 | up |
| CUST 365 PI426073487     | uc.367           | 0.00000279  | 2.331606  | up |
| ASMM9PARTA014985         | 1500016L03Rik    | 0.000386    | 2.0803518 | up |
| ASMM9PARTA047505         | AK045952         | 0.04970699  | 2.0488245 | up |
| ASMM9PARTA045585         | Gm839            | 0.00036     | 3.0297437 | up |
| ASMM9PARTA001255         |                  | 0.000828    | 2.4208212 | up |



|                         |                  |             |           |    |
|-------------------------|------------------|-------------|-----------|----|
| MM9LINCRNAEXON10124+ P1 | mouselincRNA1558 | 0.002081217 | 2.2109227 | up |
| ASMM9PARTA050616        | AK049852         | 0.000886    | 2.2020626 | up |
| ASMM9PARTA009548        | Gm8556           | 0.000038    | 2.8215811 | up |
| ASMM9PARTA003936        |                  | 0.00000431  | 2.1985137 | up |
| ASMM9PARTA005122        |                  | 0.0000296   | 2.90204   | up |
| ASMM9PARTA016359        | Gm7546           | 0.00029     | 2.8354077 | up |
| ASMM9PARTA051381        | AK019286         | 0.0000536   | 2.0747974 | up |
| ASMM9PARTA018523        | Airn             | 0.000000972 | 32.12065  | up |
| ASMM9PARTA005165        |                  | 0.019971391 | 3.3899665 | up |
| ASMM9PARTA006585        |                  | 0.011876562 | 5.0438857 | up |
| ASMM9PARTA010191        | Gm10561          | 0.003211423 | 2.4564886 | up |
| MM9LINCRNAEXON10257- P1 | mouselincRNA1492 | 0.007304789 | 2.0143862 | up |
| ASMM9PARTA015549        | A830036E02Rik    | 0.005435409 | 6.48569   | up |
| MM9LINCRNAEXON10299- P1 | mouselincRNA1501 | 0.0000139   | 5.202261  | up |
| ASMM9PARTA049471        | Crsl1            | 0.0000102   | 2.0639067 | up |
| ASMM9PARTA049471        | Crsl1            | 0.0000102   | 2.0639067 | up |
| ASMM9PARTA045633        | 4930511M06Rik    | 0.012056232 | 3.579406  | up |
| MM9LINCRNAEXON11262- P1 | mouselincRNA0611 | 0.000201    | 2.9127474 | up |
| ASMM9PARTA008566        |                  | 0.008138077 | 2.888241  | up |
| ASMM9PARTA008566        |                  | 0.008138077 | 2.888241  | up |
| MM9LINCRNAEXON10998- P1 | mouselincRNA0882 | 0.023818165 | 2.9317777 | up |
| ASMM9PARTA051664        | Trip4            | 0.025422448 | 2.3340158 | up |
| ASMM9PARTA051664        | Trip4            | 0.025422448 | 2.3340158 | up |
| ASMM9PARTA051664        | Trip4            | 0.025422448 | 2.3340158 | up |
| ASMM9PARTA013480        | Gm13024          | 5.77E-08    | 2.608804  | up |
| ASMM9PARTA050025        | nssr 1           | 0.000115    | 2.3342924 | up |
| ASMM9PARTA050025        | nssr 1           | 0.000115    | 2.3342924 | up |
| ASMM9PARTA016994        | Gm14636          | 0.001218206 | 2.3110693 | up |
| ASMM9PARTA012429        | Gm12587          | 0.00000616  | 2.4938812 | up |
| ASMM9PARTA003654        |                  | 0.00000687  | 2.0081527 | up |
| ASMM9PARTA006085        |                  | 0.001200238 | 2.1680171 | up |
| ASMM9PARTA006085        |                  | 0.001200238 | 2.1680171 | up |
| ASMM9PARTA051195        | AK077358         | 0.012521365 | 2.392778  | up |
| MM9LINCRNAEXON11518+ P1 | mouselincRNA0380 | 0.0197234   | 2.1626685 | up |
| ASMM9PARTA004654        |                  | 0.003526608 | 2.8325448 | up |
| humanlincRNA1385- P1    | humanlincRNA1385 | 0.000239    | 3.0829844 | up |
| ASMM9PARTA010528        | Gm12904          | 0.026047934 | 2.242843  | up |
| ASMM9PARTA019357        | AC115807.1       | 0.00000888  | 2.2221916 | up |
| ASMM9PARTA049188        | AK080416         | 0.0000268   | 2.868227  | up |
| ASMM9PARTA006829        |                  | 0.000205    | 3.305291  | up |
| ASMM9PARTA012197        | Gm12331          | 0.0000293   | 2.440733  | up |
| ASMM9PARTA017357        | Gm14241          | 0.023490833 | 7.235909  | up |
| ASMM9PARTA009653        | Airn             | 0.00000408  | 2.464345  | up |
| ASMM9PARTA004251        |                  | 0.00000545  | 2.9137685 | up |
| ASMM9PARTA018993        | RP23-122J17.10   | 0.039848574 | 2.3952775 | up |
| ASMM9PARTA006719        |                  | 0.0000392   | 2.3721611 | up |
| ASMM9PARTA016340        | BC006965         | 0.009729628 | 5.2280593 | up |
| ASMM9PARTA046645        | IL-TIFb          | 0.00000293  | 19.12357  | up |
| ASMM9PARTA011900        | Gm13902          | 0.0000068   | 2.1565235 | up |
| ASMM9PARTA009944        | Gm10075          | 0.0000666   | 2.6336267 | up |
| ASMM9PARTA005417        |                  | 0.000336    | 2.7443876 | up |
| ASMM9PARTA049247        | AK040741         | 0.011870915 | 3.3874133 | up |
| MM9LINCRNAEXON10743- P1 | mouselincRNA1136 | 0.003704932 | 4.004229  | up |
| ASMM9PARTA018302        | Gm4475           | 0.000178    | 2.1480916 | up |
| AI550063 P1             | mouselincRNA0690 | 0.041834004 | 4.489893  | up |
| ASMM9PARTA051448        | mKIAA0797        | 0.0000108   | 2.144439  | up |
| MM9LINCRNAEXON11089- P1 | mouselincRNA0819 | 0.007006874 | 2.4465892 | up |

|                         |                  |             |           |    |
|-------------------------|------------------|-------------|-----------|----|
| ASMM9PARTA011099        | Gm14080          | 0.000202    | 2.2792876 | up |
| ASMM9PARTA002853        |                  | 0.00000754  | 2.4123323 | up |
| ASMM9PARTA002853        |                  | 0.00000754  | 2.4123323 | up |
| ASMM9PARTA002853        |                  | 0.00000754  | 2.4123323 | up |
| ASMM9PARTA002573        |                  | 0.00000187  | 3.255407  | up |
| ASMM9PARTA008360        |                  | 0.011631306 | 2.0885925 | up |
| ASMM9PARTA050920        | AK134755         | 0.026181862 | 2.5197067 | up |
| ASMM9PARTA050920        | AK134755         | 0.026181862 | 2.5197067 | up |
| ASMM9PARTA050920        | AK134755         | 0.026181862 | 2.5197067 | up |
| ASMM9PARTA050920        | AK134755         | 0.026181862 | 2.5197067 | up |
| ASMM9PARTA050920        | AK134755         | 0.026181862 | 2.5197067 | up |
| ASMM9PARTA050920        | AK134755         | 0.026181862 | 2.5197067 | up |
| ASMM9PARTA050920        | AK134755         | 0.026181862 | 2.5197067 | up |
| ASMM9PARTA050920        | AK134755         | 0.026181862 | 2.5197067 | up |
| ASMM9PARTA017328        | Gm14396          | 0.00047     | 4.0243692 | up |
| MM9LINCRNAEXON1047+ P1  | mouselincRNA1297 | 0.01472569  | 3.2404318 | up |
| ASMM9PARTA048564        | AK009785         | 0.03556601  | 3.09798   | up |
| ASMM9PARTA050840        | AK050360         | 0.000294    | 2.796767  | up |
| ASMM9PARTA010734        | Gm13681          | 0.0000179   | 2.0720553 | up |
| ASMM9PARTA018651        | Gm15900          | 0.000282    | 2.4469993 | up |
| ASMM9PARTA004130        |                  | 0.034731563 | 2.9782627 | up |
| humanlincRNA1395+ P1    | humanlincRNA1395 | 0.001504081 | 2.0674143 | up |
| ASMM9PARTA004792        |                  | 0.008924713 | 2.8415487 | up |
| ASMM9PARTA015228        | Gm12576          | 0.020730088 | 2.4878552 | up |
| ASMM9PARTA003730        |                  | 0.009118591 | 2.017128  | up |
| ASMM9PARTA012081        | Gm14842          | 0.03005221  | 3.0849192 | up |
| ASMM9PARTA012560        | Gm8152           | 0.0000259   | 2.2772627 | up |
| MM9LINCRNAEXON11832+ P1 |                  | 0.000003    | 4.128426  | up |
| ASMM9PARTA005321        |                  | 0.001206461 | 2.0656667 | up |
| MM9LINCRNAEXON10606+ P1 | mouselincRNA1220 | 0.004105524 | 2.7398615 | up |
| ASMM9PARTA050390        | IAN5             | 0.04108326  | 2.0568163 | up |
| ASMM9PARTA012956        | Gm11246          | 0.0000107   | 2.833935  | up |
| ASMM9PARTA018153        | Gm3555           | 0.002138133 | 3.5924873 | up |
| ASMM9PARTA018153        | Gm3555           | 0.002138133 | 3.5924873 | up |
| ASMM9PARTA048105        | AK154225         | 0.048674565 | 2.1999137 | up |
| ASMM9PARTA045481        | Acin1            | 0.001137984 | 2.930942  | up |
| ASMM9PARTA045481        | Acin1            | 0.001137984 | 2.930942  | up |
| ASMM9PARTA045481        | Acin1            | 0.001137984 | 2.930942  | up |
| ASMM9PARTA045481        | Acin1            | 0.001137984 | 2.930942  | up |
| ASMM9PARTA000875        |                  | 0.01336103  | 3.4429834 | up |
| ASMM9PARTA045894        | Gm2694           | 0.00000456  | 2.367614  | up |
| ASMM9PARTA002182        |                  | 0.0000739   | 2.066629  | up |
| ASMM9PARTA011795        | Gm5939           | 0.030428339 | 2.9933884 | up |
| ASMM9PARTA050410        | Sart3            | 0.032490447 | 2.2755787 | up |
| ASMM9PARTA002287        |                  | 0.034672294 | 2.5321636 | up |
| ASMM9PARTA003909        |                  | 0.006051574 | 2.93003   | up |
| ASMM9PARTA014215        | Gm15326          | 0.000372    | 2.1516373 | up |
| ASMM9PARTA014677        | A830036E02Rik    | 0.000295    | 66.14013  | up |
| ASMM9PARTA006503        |                  | 0.013109443 | 2.5266209 | up |
| ASMM9PARTA006503        |                  | 0.013109443 | 2.5266209 | up |
| ASMM9PARTA046346        | AK009784         | 0.03122611  | 3.678357  | up |
| ASMM9PARTA003355        |                  | 0.012020879 | 2.1215281 | up |
| ASMM9PARTA048576        | AK139806         | 0.000554    | 2.706758  | up |
| ASMM9PARTA049336        | Phc3             | 0.041802477 | 2.2484055 | up |
| ASMM9PARTA049336        | Phc3             | 0.041802477 | 2.2484055 | up |
| ASMM9PARTA049336        | Phc3             | 0.041802477 | 2.2484055 | up |
| ASMM9PARTA049336        | Phc3             | 0.041802477 | 2.2484055 | up |

|                         |                  |             |           |    |
|-------------------------|------------------|-------------|-----------|----|
| ASMM9PARTA017655        | Gm14033          | 0.0000308   | 3.381938  | up |
| mouselincRNA1619+ P1    | mouselincRNA1619 | 0.035568483 | 2.4425995 | up |
| ASMM9PARTA010820        | Gm13682          | 0.0351184   | 2.0219026 | up |
| ASMM9PARTA048287        | AK132606         | 0.00000451  | 2.2182393 | up |
| MM9LINCRNAEXON11366- P1 | mouselincRNA0586 | 0.014363263 | 2.676287  | up |
| MM9LINCRNAEXON10522+ P1 | mouselincRNA1351 | 0.005230516 | 2.0842113 | up |
| ASMM9PARTA050649        | AK006397         | 0.004241719 | 2.9088519 | up |
| MM9LINCRNAEXON11828+ P1 | mouselincRNA0271 | 0.009686475 | 2.0017784 | up |
| ASMM9PARTA046930        | AK018772         | 0.000000342 | 3.8772461 | up |
| ASMM9PARTA007292        |                  | 0.002808958 | 2.4767034 | up |
| ASMM9PARTA007292        |                  | 0.002808958 | 2.4767034 | up |
| ASMM9PARTA007292        |                  | 0.002808958 | 2.4767034 | up |
| ASMM9PARTA048920        | AK078367         | 0.0000252   | 2.0531669 | up |
| ASMM9PARTA048920        | AK078367         | 0.0000252   | 2.0531669 | up |
| ASMM9PARTA048920        | AK078367         | 0.0000252   | 2.0531669 | up |
| ASMM9PARTA012893        | Hmgb1-ps5        | 0.000115    | 2.3804212 | up |
| ASMM9PARTA047260        | AK039495         | 0.005271091 | 2.366137  | up |
| ASMM9PARTA047260        | AK039495         | 0.005271091 | 2.366137  | up |
| ASMM9PARTA047260        | AK039495         | 0.005271091 | 2.366137  | up |
| ASMM9PARTA010688        | Gm15059          | 0.0000167   | 2.8139498 | up |
| ASMM9PARTA046016        | Olfr856-ps1      | 0.000678    | 2.6691747 | up |
| ASMM9PARTA002453        |                  | 0.017013626 | 2.6575408 | up |
| ASMM9PARTA018017        | Gm16169          | 0.004413288 | 4.2493205 | up |
| ASMM9PARTA009000        |                  | 0.000655    | 2.386869  | up |
| ASMM9PARTA045101        | C030034L19Rik    | 0.027725356 | 2.2098374 | up |
| ASMM9PARTA046691        | AK158612         | 0.000578    | 13.532002 | up |
| MM9LINCRNAEXON10071+ P1 | mouselincRNA1506 | 0.000516    | 2.4702082 | up |
| ASMM9PARTA001943        |                  | 0.0000458   | 2.0189033 | up |
| mouselincRNA0078- P1    | mouselincRNA0078 | 0.042731665 | 2.1083522 | up |
| ASMM9PARTA005470        |                  | 0.009119179 | 2.27836   | up |
| ASMM9PARTA005470        |                  | 0.009119179 | 2.27836   | up |
| DV645173 P1             | humanlincRNA0146 | 0.000425    | 2.3809586 | up |
| ASMM9PARTA013817        | Gm15247          | 0.0000484   | 2.220241  | up |
| ASMM9PARTA013817        | Gm15247          | 0.0000484   | 2.220241  | up |
| ASMM9PARTA003161        |                  | 0.000378    | 2.779386  | up |
| ASMM9PARTA014167        | Gm13944          | 0.00000637  | 24.713064 | up |
| ASMM9PARTA014167        | Gm13944          | 0.00000637  | 24.713064 | up |
| ASMM9PARTA014167        | Gm13944          | 0.00000637  | 24.713064 | up |
| ASMM9PARTA047833        | AK142028         | 0.0000286   | 2.3726356 | up |
| ASMM9PARTA047833        | AK142028         | 0.0000286   | 2.3726356 | up |
| ASMM9PARTA016977        | Gm16801          | 0.002010423 | 2.1518593 | up |
| ASMM9PARTA016977        | Gm16801          | 0.002010423 | 2.1518593 | up |
| ASMM9PARTA016977        | Gm16801          | 0.002010423 | 2.1518593 | up |
| ASMM9PARTA016977        | Gm16801          | 0.002010423 | 2.1518593 | up |
| MM9LINCRNAEXON12014+ P1 | mouselincRNA0024 | 0.04592268  | 2.5345564 | up |
| ASMM9PARTA002758        |                  | 0.0000283   | 2.4080474 | up |
| ASMM9PARTA049905        | AK131821         | 0.002145707 | 2.0053005 | up |
| ASMM9PARTA048635        | 2810051F02Rik    | 0.000153    | 2.5020425 | up |
| ASMM9PARTA006390        |                  | 0.006344566 | 2.147089  | up |
| CUST 150 PI426073487    | uc.152           | 0.001006108 | 2.1621218 | up |
| ASMM9PARTA049815        | AK042933         | 0.0000436   | 3.694951  | up |
| ASMM9PARTA011317        | Hmgb1-ps3        | 0.0000112   | 2.4633458 | up |
| ASMM9PARTA051121        | Lrrc49           | 0.00000406  | 30.136993 | up |
| ASMM9PARTA051121        | Lrrc49           | 0.00000406  | 30.136993 | up |
| ASMM9PARTA051121        | Lrrc49           | 0.00000406  | 30.136993 | up |
| ASMM9PARTA049391        | Ptpn22           | 0.037405808 | 3.3586593 | up |
| ASMM9PARTA000678        |                  | 0.000705    | 2.010737  | up |

|                         |                  |             |           |    |
|-------------------------|------------------|-------------|-----------|----|
| ASMM9PARTA002375        |                  | 0.00000236  | 10.672522 | up |
| ASMM9PARTA018971        | AC165246.1       | 0.000978    | 3.2285278 | up |
| ASMM9PARTA016392        | Gm13944          | 0.00056     | 2.0245235 | up |
| ASMM9PARTA016392        | Gm13944          | 0.00056     | 2.0245235 | up |
| ASMM9PARTA016392        | Gm13944          | 0.00056     | 2.0245235 | up |
| ASMM9PARTA049191        | A230067G21Rik    | 0.0000169   | 3.3046813 | up |
| CUST 62 PI426073487     | uc.64            | 0.0000197   | 2.16086   | up |
| ASMM9PARTA005370        |                  | 0.028455436 | 2.2531095 | up |
| ASMM9PARTA048621        | Akd2             | 0.01106173  | 2.9409096 | up |
| ASMM9PARTA006158        |                  | 0.001226889 | 2.3245618 | up |
| CUST 280 PI426073487    | uc.282           | 0.000848    | 2.0808525 | up |
| CUST 280 PI426073487    | uc.282           | 0.000848    | 2.0808525 | up |
| CUST 280 PI426073487    | uc.282           | 0.000848    | 2.0808525 | up |
| CUST 375 PI426073487    | uc.377           | 0.009526183 | 5.7803087 | up |
| ASMM9PARTA050230        | AK131834         | 0.001892743 | 6.9195056 | up |
| ASMM9PARTA007495        |                  | 0.00000988  | 2.4579487 | up |
| ASMM9PARTA007256        |                  | 0.00063     | 2.2241955 | up |
| ASMM9PARTA003879        |                  | 0.0000433   | 2.259249  | up |
| ASMM9PARTA007283        |                  | 0.000184    | 7.688201  | up |
| MM9LINCRNAEXON12034- P1 | mouselincRNA0038 | 0.002067127 | 2.0816345 | up |
| ASMM9PARTA003916        |                  | 0.000000772 | 3.034404  | up |
| MM9LINCRNAEXON10204- P1 | mouselincRNA1471 | 0.00026     | 2.1629808 | up |
| MM9LINCRNAEXON10413- P1 | mouselincRNA1260 | 0.00340574  | 2.0790362 | up |
| ASMM9PARTA044959        | E230029C05Rik    | 0.000134    | 2.215237  | up |
| ASMM9PARTA005240        |                  | 0.000645    | 2.5264568 | up |
| ASMM9PARTA048669        | AK165766         | 0.0000759   | 2.680739  | up |
| ASMM9PARTA048669        | AK165766         | 0.0000759   | 2.680739  | up |
| ASMM9PARTA048669        | AK165766         | 0.0000759   | 2.680739  | up |
| ASMM9PARTA047938        | AK082117         | 0.00000995  | 2.7594564 | up |
| ASMM9PARTA019295        | RP23-133I8.1     | 0.0000967   | 2.4956837 | up |
| ASMM9PARTA047783        | Ugcgl2           | 0.0000784   | 3.3411317 | up |
| ASMM9PARTA003032        |                  | 0.024053346 | 2.558817  | up |
| ASMM9PARTA003032        |                  | 0.024053346 | 2.558817  | up |
| ASMM9PARTA003032        |                  | 0.024053346 | 2.558817  | up |
| ASMM9PARTA012510        | Gm13121          | 0.000000653 | 2.3313408 | up |
| ASMM9PARTA044960        | BC006965         | 0.0000415   | 24.99514  | up |
| ASMM9PARTA010161        | Gm9387           | 0.000167    | 2.3674896 | up |
| ASMM9PARTA012055        | Gm12118          | 0.0000623   | 2.2615724 | up |
| ASMM9PARTA011936        | Gm13320          | 0.000000125 | 2.7886217 | up |
| ASMM9PARTA000775        |                  | 0.015329428 | 2.0237582 | up |
| ASMM9PARTA013691        | Gm14162          | 0.000122    | 2.7063563 | up |
| ASMM9PARTA018548        | Airn             | 0.000185    | 2.4098134 | up |
| ASMM9PARTA018548        | Airn             | 0.000185    | 2.4098134 | up |
| ASMM9PARTA014091        | 4930419G24Rik    | 0.03582335  | 3.5791323 | up |
| ASMM9PARTA014091        | 4930419G24Rik    | 0.03582335  | 3.5791323 | up |
| ASMM9PARTA010447        | Gm6088           | 0.002167696 | 2.0168116 | up |
| ASMM9PARTA046327        | AK009351         | 2.97E-08    | 3.6528134 | up |
| ASMM9PARTA010097        | Gm10361          | 0.0000913   | 2.6537814 | up |
| ASMM9PARTA000537        |                  | 0.000127    | 2.5941472 | up |
| ASMM9PARTA012255        | Gm11668          | 0.038839106 | 2.4875536 | up |
| CUST 626 PI426073487    | uc.147           | 0.002982467 | 2.655264  | up |
| CUST 626 PI426073487    | uc.147           | 0.002982467 | 2.655264  | up |
| CUST 626 PI426073487    | uc.147           | 0.002982467 | 2.655264  | up |
| ASMM9PARTA005002        |                  | 0.0000951   | 2.8442383 | up |
| ASMM9PARTA014139        | Gm3160           | 0.0000163   | 2.5387328 | up |
| ASMM9PARTA014139        | Gm3160           | 0.0000163   | 2.5387328 | up |
| ASMM9PARTA007789        |                  | 0.00000244  | 2.0733392 | up |

|                          |                  |             |           |    |
|--------------------------|------------------|-------------|-----------|----|
| ASMM9PARTA001661         |                  | 0.00305647  | 4.7534437 | up |
| ASMM9PARTA005550         |                  | 0.000101    | 2.3074667 | up |
| humanlincRNA2125- P1     | humanlincRNA2125 | 0.001283047 | 2.162889  | up |
| ASMM9PARTA002121         |                  | 0.001094694 | 2.2519882 | up |
| ASMM9PARTA015409         | Gm10565          | 0.009211536 | 2.8152647 | up |
| ASMM9PARTA013565         | Gm14473          | 0.00000376  | 2.1654344 | up |
| ASMM9PARTA003572         |                  | 0.000015    | 2.6028886 | up |
| ASMM9PARTA046351         | Ppil4            | 0.000693    | 4.7250004 | up |
| ASMM9PARTA050623         | Kox-1            | 0.043408602 | 2.1488585 | up |
| ASMM9PARTA018884         | AC126606.1       | 0.0000685   | 2.1529355 | up |
| ASMM9PARTA018884         | AC126606.1       | 0.0000685   | 2.1529355 | up |
| ASMM9PARTA000684         |                  | 0.00000768  | 4.0846176 | up |
| MM9LINC RNAEXON10518+ P1 | mouselincRNA1347 | 0.000000229 | 6.925032  | up |
| ASMM9PARTA013453         | Gm16471          | 0.0000142   | 2.5961287 | up |
| ASMM9PARTA015970         | A730036117Rik    | 0.007606336 | 2.025186  | up |
| ASMM9PARTA012955         | Gm13932          | 0.0000572   | 2.3989727 | up |
| ASMM9PARTA045371         | 5033406O09Rik    | 0.033640627 | 3.1963263 | up |
| ASMM9PARTA002899         |                  | 0.00000316  | 2.6463146 | up |
| ASMM9PARTA002899         |                  | 0.00000316  | 2.6463146 | up |
| ASMM9PARTA002899         |                  | 0.00000316  | 2.6463146 | up |
| ASMM9PARTA049183         | AK036371         | 0.004450032 | 2.2127364 | up |
| ASMM9PARTA002490         |                  | 0.00328782  | 2.010554  | up |
| ASMM9PARTA001846         |                  | 0.000444    | 2.4273815 | up |
| ASMM9PARTA003213         |                  | 0.0000529   | 2.3987834 | up |
| CUST 846 PI426073487     | uc.367           | 0.012606558 | 2.2397985 | up |
| ASMM9PARTA046971         | AK138212         | 0.025324816 | 4.1287336 | up |
| ASMM9PARTA001331         |                  | 0.005287835 | 3.7277648 | up |
| ASMM9PARTA011302         | Gm5762           | 0.002200684 | 2.2737384 | up |
| ASMM9PARTA003364         |                  | 0.046860997 | 2.690849  | up |
| ASMM9PARTA001787         |                  | 0.0000628   | 3.137793  | up |
| MM9LINC RNAEXON11899+ P1 | mouselincRNA0173 | 0.01598255  | 2.7152762 | up |
| MM9LINC RNAEXON12113- P1 |                  | 0.0000157   | 2.2590175 | up |
| ASMM9PARTA048395         | Gng13            | 0.0000249   | 2.0286946 | up |
| ASMM9PARTA048395         | Gng13            | 0.0000249   | 2.0286946 | up |
| MM9LINC RNAEXON11573- P1 | mouselincRNA0396 | 0.013408884 | 2.0755594 | up |
| ASMM9PARTA045591         | Gm11110          | 0.018723879 | 2.361407  | up |
| ASMM9PARTA007871         |                  | 0.0000386   | 2.3022263 | up |
| ASMM9PARTA002181         |                  | 0.0000148   | 2.5523238 | up |
| ASMM9PARTA010492         | Gm13378          | 0.00016     | 2.0541239 | up |
| EL605756 P1              | humanlincRNA0451 | 0.000341    | 3.1301522 | up |
| ASMM9PARTA016760         | Gm2694           | 0.0000766   | 7.4226823 | up |
| ASMM9PARTA019401         | 9430021M05Rik    | 0.00000354  | 3.767519  | up |
| BC040767 P1              | humanlincRNA1200 | 0.000000439 | 28.610907 | up |
| ASMM9PARTA049783         | Rps6ka1          | 0.00000531  | 2.581213  | up |
| ASMM9PARTA011684         | Gm12345          | 0.0000723   | 2.2303417 | up |
| MM9LINC RNAEXON10767+ P1 | mouselincRNA1138 | 0.0000169   | 4.1780615 | up |
| MM9LINC RNAEXON10396- P1 | mouselincRNA1257 | 0.001013944 | 3.5003083 | up |
| ASMM9PARTA048987         | cAMP-GEFII       | 0.0000561   | 2.544815  | up |
| ASMM9PARTA048987         | cAMP-GEFII       | 0.0000561   | 2.544815  | up |
| ASMM9PARTA048987         | cAMP-GEFII       | 0.0000561   | 2.544815  | up |
| ASMM9PARTA048987         | cAMP-GEFII       | 0.0000561   | 2.544815  | up |
| ASMM9PARTA006908         |                  | 0.007612485 | 4.023833  | up |
| ASMM9PARTA000659         |                  | 0.0000145   | 2.0331874 | up |
| MM9LINC RNAEXON11795+ P1 | mouselincRNA0252 | 0.0000168   | 41.30106  | up |
| MM9LINC RNAEXON10103+ P1 | mouselincRNA1524 | 0.0000332   | 5.9307623 | up |
| ASMM9PARTA018377         | Gm9727           | 0.00000368  | 2.1676364 | up |
| MM9LINC RNAEXON10539- P1 |                  | 0.000000804 | 10.322508 | up |

|                      |                  |             |           |    |
|----------------------|------------------|-------------|-----------|----|
| ASMM9PARTA011271     | Gm13228          | 0.0000257   | 2.9032066 | up |
| BU563586 P1          | mouselincRNA1020 | 0.0000607   | 2.3051958 | up |
| BU563586 P1          | mouselincRNA1020 | 0.0000607   | 2.3051958 | up |
| BU563586 P1          | mouselincRNA1020 | 0.0000607   | 2.3051958 | up |
| BU563586 P1          | mouselincRNA1020 | 0.0000607   | 2.3051958 | up |
| BU563586 P1          | mouselincRNA1020 | 0.0000607   | 2.3051958 | up |
| BU563586 P1          | mouselincRNA1020 | 0.0000607   | 2.3051958 | up |
| BU563586 P1          | mouselincRNA1020 | 0.0000607   | 2.3051958 | up |
| BU563586 P1          | mouselincRNA1020 | 0.0000607   | 2.3051958 | up |
| BU563586 P1          | mouselincRNA1020 | 0.0000607   | 2.3051958 | up |
| BU563586 P1          | mouselincRNA1020 | 0.0000607   | 2.3051958 | up |
| ASMM9PARTA018144     | Gm15051          | 0.000032    | 2.0457785 | up |
| ASMM9PARTA011414     | Gm15778          | 0.000000297 | 2.4930751 | up |
| ASMM9PARTA003826     |                  | 0.0000516   | 2.724293  | up |
| ASMM9PARTA049172     | Csnk2a1          | 0.023294207 | 3.2138712 | up |
| ASMM9PARTA001365     |                  | 0.0000871   | 2.5701458 | up |
| ASMM9PARTA002329     |                  | 0.00000023  | 7.3232145 | up |
| ASMM9PARTA012094     | Gm6461           | 0.000526    | 2.8002222 | up |
| ASMM9PARTA004765     |                  | 0.001587989 | 2.1544375 | up |
| ASMM9PARTA045708     | 3930402G23Rik    | 0.000181    | 2.1272426 | up |
| ASMM9PARTA018060     | E130111B04Rik    | 0.007533206 | 2.5757177 | up |
| ASMM9PARTA012898     | Gm5396           | 0.00000217  | 2.5345893 | up |
| ASMM9PARTA001969     |                  | 0.005341575 | 2.1894698 | up |
| CUST 174 PI426073487 | uc.176           | 0.008749773 | 3.340239  | up |
| ASMM9PARTA018095     | Gm16990          | 0.001112052 | 2.4591026 | up |
| ASMM9PARTA046635     | AK046981         | 0.024679642 | 3.0707684 | up |
| ASMM9PARTA046635     | AK046981         | 0.024679642 | 3.0707684 | up |
| ASMM9PARTA046635     | AK046981         | 0.024679642 | 3.0707684 | up |
| ASMM9PARTA046635     | AK046981         | 0.024679642 | 3.0707684 | up |
| ASMM9PARTA046635     | AK046981         | 0.024679642 | 3.0707684 | up |
| ASMM9PARTA046635     | AK046981         | 0.024679642 | 3.0707684 | up |
| ASMM9PARTA046635     | AK046981         | 0.024679642 | 3.0707684 | up |
| ASMM9PARTA046635     | AK046981         | 0.024679642 | 3.0707684 | up |
| ASMM9PARTA046635     | AK046981         | 0.024679642 | 3.0707684 | up |
| CUST 271 PI426073487 | uc.273           | 0.006045092 | 3.300645  | up |
| ASMM9PARTA002204     |                  | 0.0000286   | 2.802411  | up |
| ASMM9PARTA013698     | Gm13366          | 0.005261274 | 4.8298717 | up |
| ASMM9PARTA051114     | Dnchc2           | 0.000213    | 2.3465252 | up |
| ASMM9PARTA012120     | Gm5937           | 0.0000265   | 2.2877882 | up |
| ASMM9PARTA001998     |                  | 0.031154037 | 2.6208203 | up |
| ASMM9PARTA014788     | B930095G15Rik    | 0.00000683  | 5.532669  | up |
| ASMM9PARTA007333     |                  | 0.010852524 | 2.2434957 | up |
| ASMM9PARTA050069     | BC038278         | 0.017552208 | 3.5265713 | up |
| CUST 155 PI426409190 |                  | 0.009918    | 2.0826352 | up |
| ASMM9PARTA048236     | AK182695         | 0.018163228 | 2.247597  | up |
| ASMM9PARTA049027     | AK047243         | 0.0000543   | 2.1900108 | up |
| ASMM9PARTA002260     |                  | 0.000839    | 2.7180097 | up |
| ASMM9PARTA002260     |                  | 0.000839    | 2.7180097 | up |
| ASMM9PARTA017175     | E130307A14Rik    | 0.023805067 | 2.0302386 | up |
| ASMM9PARTA048313     | AK153988         | 0.0000741   | 2.4665794 | up |
| ASMM9PARTA004889     |                  | 0.012255047 | 2.4339495 | up |
| ASMM9PARTA017814     | Gm12840          | 0.00000586  | 2.3893678 | up |
| ASMM9PARTA045192     | Ipw              | 0.0000109   | 5.409522  | up |
| ASMM9PARTA017528     | Gm13643          | 0.00000531  | 8.988608  | up |
| ASMM9PARTA010788     | Gm12261          | 0.00000501  | 2.414087  | up |

|                          |                   |             |             |      |
|--------------------------|-------------------|-------------|-------------|------|
| ASMM9PARTA014333         | 1500016L03Rik     | 0.000878    | 6.8242226   | up   |
| ASMM9PARTA011755         | Hmgbl-ps6         | 0.000174    | 2.4944484   | up   |
| ASMM9PARTA003370         |                   | 0.00339874  | 2.5733292   | up   |
| ASMM9PARTA001844         |                   | 0.000108    | 6.169028    | up   |
| ASMM9PARTA004751         |                   | 0.023230705 | 2.95953     | up   |
| CF545861 P1              | humanlincRNA1302  | 0.001655845 | 2.0089698   | up   |
| CF545861 P1              | humanlincRNA1302  | 0.001655845 | 2.0089698   | up   |
| CF545861 P1              | humanlincRNA1302  | 0.001655845 | 2.0089698   | up   |
| CF545861 P1              | humanlincRNA1302  | 0.001655845 | 2.0089698   | up   |
| CF545861 P1              | humanlincRNA1302  | 0.001655845 | 2.0089698   | up   |
| CF545861 P1              | humanlincRNA1302  | 0.001655845 | 2.0089698   | up   |
| ASMM9PARTA046423         | AK016061          | 0.000154    | 2.4863772   | up   |
| MM9LINC RNAEXON10221- P1 | mouse lincRNA1483 | 0.009539064 | 3.5606596   | up   |
| MM9LINC RNAEXON11105+ P1 | mouse lincRNA0821 | 0.004060553 | 3.4164205   | up   |
| ASMM9PARTA014299         | Gm13375           | 0.000103    | 2.5118647   | up   |
| ASMM9PARTA051714         | AK163556          | 0.000427    | 2.1364088   | up   |
| ASMM9PARTA012250         | Gm15387           | 0.000014    | 2.225801    | up   |
| ASMM9PARTA003552         |                   | 0.01268047  | 2.4038773   | up   |
| ASMM9PARTA016836         | Hoxb3os           | 0.000823    | 2.5090508   | up   |
| ASMM9PARTA016836         | Hoxb3os           | 0.000823    | 2.5090508   | up   |
| ASMM9PARTA016836         | Hoxb3os           | 0.000823    | 2.5090508   | up   |
| ASMM9PARTA044894         | C330024D21Rik     | 0.00000351  | 5.3520403   | up   |
| ASMM9PARTA014069         | A730017L22Rik     | 0.0000979   | 2.6616864   | up   |
| MM9LINC RNAEXON11310- P1 | mouse lincRNA0658 | 0.000146    | 2.061943    | up   |
| ASMM9PARTA004567         |                   | 0.000783    | 2.2554648   | up   |
| ASMM9PARTA011990         | Lamr1-ps1         | 0.0000172   | 10.635635   | up   |
| ASMM9PARTA010121         | Gm14162           | 0.0000521   | 2.6393824   | up   |
| ASMM9PARTA015799         | 5530601H04Rik     | 0.00024     | 2.2407029   | up   |
| DV653038 P1              | mouse lincRNA1246 | 0.000301    | 2.5972872   | up   |
| DV653038 P1              | mouse lincRNA1246 | 0.000301    | 2.5972872   | up   |
| DV653038 P1              | mouse lincRNA1246 | 0.000301    | 2.5972872   | up   |
| DV653038 P1              | mouse lincRNA1246 | 0.000301    | 2.5972872   | up   |
| DV653038 P1              | mouse lincRNA1246 | 0.000301    | 2.5972872   | up   |
| DV653038 P1              | mouse lincRNA1246 | 0.000301    | 2.5972872   | up   |
| ASMM9PARTA008317         |                   | 0.002834839 | 0.325945061 | down |
| ASMM9PARTA001658         |                   | 0.000265    | 0.342372234 | down |
| ASMM9PARTA050096         | AK039125          | 0.04244341  | 0.412248327 | down |
| BY668977 P1              | humanlincRNA0676  | 0.01711409  | 0.495437516 | down |
| ASMM9PARTA007767         |                   | 0.001897486 | 0.412644075 | down |
| MM9LINC RNAEXON10677- P1 | mouse lincRNA1108 | 0.024073955 | 0.389109585 | down |
| ASMM9PARTA004651         |                   | 0.042547293 | 0.279583788 | down |
| ASMM9PARTA002902         |                   | 0.040899456 | 0.295395179 | down |
| AK138338 P1              | mouse lincRNA1426 | 0.000292    | 0.288348306 | down |
| MM9LINC RNAEXON10863- P1 | mouse lincRNA1009 | 0.031525224 | 0.468723422 | down |
| ASMM9PARTA051451         | AK032255          | 0.007611876 | 0.339942518 | down |
| ASMM9PARTA016463         | 2410057H14Rik     | 0.006866116 | 0.499634767 | down |
| ASMM9PARTA006658         |                   | 0.03766076  | 0.228369545 | down |
| ASMM9PARTA016370         | 4930448N21Rik     | 0.002114768 | 0.425981788 | down |
| ASMM9PARTA047030         | BC079904          | 0.02010789  | 0.43873808  | down |
| BI738939 P1              | mouse lincRNA0637 | 0.014044236 | 0.456293078 | down |
| ASMM9PARTA007676         |                   | 0.003625626 | 0.456742803 | down |
| ASMM9PARTA011381         | Mup-ps14          | 0.000208    | 0.317072885 | down |
| ASMM9PARTA001776         |                   | 0.001569815 | 0.383517786 | down |
| ASMM9PARTA048053         | AK086749          | 0.000964    | 0.361725297 | down |
| ASMM9PARTA048053         | AK086749          | 0.000964    | 0.361725297 | down |
| ASMM9PARTA010105         | Ear-ps2           | 0.002450254 | 0.426082304 | down |
| ASMM9PARTA045860         | A630072M18Rik     | 0.041306496 | 0.443967268 | down |

|                         |                  |             |             |      |
|-------------------------|------------------|-------------|-------------|------|
| ASMM9PARTA051179        | AK162599         | 0.000106    | 0.054249905 | down |
| ASMM9PARTA001669        |                  | 0.00000937  | 0.225942593 | down |
| ASMM9PARTA017326        | C030005K06Rik    | 0.0000048   | 0.243144776 | down |
| ASMM9PARTA017326        | C030005K06Rik    | 0.0000048   | 0.243144776 | down |
| ASMM9PARTA017326        | C030005K06Rik    | 0.0000048   | 0.243144776 | down |
| ASMM9PARTA014132        | 4930500J02Rik    | 0.007932568 | 0.489576237 | down |
| ASMM9PARTA051038        | BC065393         | 0.0000314   | 0.37705612  | down |
| ASMM9PARTA051038        | BC065393         | 0.0000314   | 0.37705612  | down |
| ASMM9PARTA051038        | BC065393         | 0.0000314   | 0.37705612  | down |
| MM9LINCRNAEXON11848- P1 | mouselincRNA0275 | 0.002884034 | 0.487236689 | down |
| ASMM9PARTA014587        | 1110050K14Rik    | 0.049582146 | 0.477183336 | down |
| ASMM9PARTA018348        | Gm15717          | 0.026301028 | 0.425540607 | down |
| ASMM9PARTA004962        |                  | 0.043338127 | 0.464302907 | down |
| ASMM9PARTA004491        |                  | 0.00000453  | 0.155603262 | down |
| ASMM9PARTA050182        | AB294528         | 0.000119    | 0.42473044  | down |
| ASMM9PARTA019195        | Mup-ps4          | 0.000207    | 0.300166803 | down |
| ASMM9PARTA017897        | 7SK.148          | 0.004638983 | 0.490170489 | down |
| ASMM9PARTA018658        | 4930524O07Rik    | 0.016588803 | 0.416587446 | down |
| ASMM9PARTA018658        | 4930524O07Rik    | 0.016588803 | 0.416587446 | down |
| CUST 844 PI426073487    | uc.365           | 0.002935674 | 0.400308398 | down |
| CF723729 P1             | humanlincRNA0214 | 0.001162223 | 0.35999182  | down |
| ASMM9PARTA011084        | Gm11212          | 0.041761033 | 0.472175991 | down |
| ASMM9PARTA048083        | AK045744         | 0.00000881  | 0.203487429 | down |
| ASMM9PARTA003556        |                  | 0.03140472  | 0.427254715 | down |
| ASMM9PARTA012178        | Mup-ps13         | 0.0000849   | 0.270685465 | down |
| ASMM9PARTA005430        |                  | 0.000481    | 0.297645455 | down |
| ASMM9PARTA006529        |                  | 0.00264838  | 0.359784446 | down |
| ASMM9PARTA006529        |                  | 0.00264838  | 0.359784446 | down |
| CUST 685 PI426073487    | uc.206           | 0.000929    | 0.432024303 | down |
| ASMM9PARTA007358        |                  | 0.00858018  | 0.381737043 | down |
| ASMM9PARTA018679        | RP23-353F16.2    | 0.012067884 | 0.408693015 | down |
| ASMM9PARTA006695        |                  | 0.0000413   | 0.404202199 | down |
| ASMM9PARTA002534        |                  | 0.00048     | 0.327512047 | down |
| ASMM9PARTA050887        | AK135845         | 0.003916789 | 0.409443738 | down |
| ASMM9PARTA013927        | Gm16002          | 0.0000318   | 0.32125911  | down |
| ASMM9PARTA047402        | AK131831         | 0.001281894 | 0.37229095  | down |
| BX520759 P1             | humanlincRNA2146 | 0.001458974 | 0.353990245 | down |
| ASMM9PARTA012912        | Mup-ps22         | 0.00000183  | 0.360630905 | down |
| ASMM9PARTA011898        | Mup-ps16         | 0.0000106   | 0.41563741  | down |
| ASMM9PARTA012332        | Mup-ps21         | 0.002465222 | 0.149434592 | down |
| AW060438 P1             | humanlincRNA0797 | 0.035770245 | 0.40650694  | down |
| ASMM9PARTA012212        | Gm14900          | 0.000599    | 0.279539123 | down |
| ASMM9PARTA006997        |                  | 0.03711573  | 0.189660481 | down |
| ASMM9PARTA014368        | 2410018L13Rik    | 0.001096903 | 0.471016295 | down |
| ASMM9PARTA012180        | Mup-ps17         | 0.00000043  | 0.191345079 | down |
| ASMM9PARTA016956        | Mup-ps4          | 0.000219    | 0.465786709 | down |
| ASMM9PARTA003754        |                  | 0.0000447   | 0.137530122 | down |
| ASMM9PARTA047376        | AK038606         | 0.002498919 | 0.443905523 | down |
| ASMM9PARTA003416        |                  | 0.032367382 | 0.110696589 | down |
| ASMM9PARTA003416        |                  | 0.032367382 | 0.110696589 | down |
| CUST 185 PI426409190    |                  | 0.000166    | 0.375639818 | down |
| ASMM9PARTA049776        | 4933409K07Rik    | 0.001588723 | 0.477583998 | down |
| ASMM9PARTA001480        |                  | 0.001743645 | 0.487042953 | down |
| ASMM9PARTA008552        |                  | 0.001418641 | 0.360786439 | down |
| ASMM9PARTA013751        | Mup-ps8          | 0.00092     | 0.37462312  | down |
| ASMM9PARTA051561        |                  | 0.000069    | 0.328938063 | down |
| ASMM9PARTA000231        |                  | 0.013362653 | 0.327757479 | down |



|                          |                  |             |             |      |
|--------------------------|------------------|-------------|-------------|------|
| AK139568 P1              | humanlincRNA0333 | 0.000000471 | 0.285184714 | down |
| ASMM9PARTA004804         |                  | 0.00000439  | 0.28165144  | down |
| ASMM9PARTA013055         | Gm15488          | 0.03341248  | 0.442977814 | down |
| MM9LINC RNAEXON10979- P1 | mouselincRNA0870 | 0.011793463 | 0.377246399 | down |
| ASMM9PARTA010282         | Gm14622          | 0.037775133 | 0.435901226 | down |
| ASMM9PARTA012440         | Mup-ps9          | 0.0000877   | 0.359256117 | down |
| CUST 718 PI426073487     | uc.239           | 0.00000519  | 0.464708848 | down |
| ASMM9PARTA046584         | AK083606         | 0.030209748 | 0.344149611 | down |
| ASMM9PARTA012206         | Mup-ps18         | 0.000000449 | 0.257153708 | down |
| MM9LINC RNAEXON10524+ P1 |                  | 0.00241745  | 0.211124576 | down |
| ASMM9PARTA007875         |                  | 0.03281851  | 0.23333765  | down |
| MM9LINC RNAEXON11962+ P1 |                  | 0.002282949 | 0.473719914 | down |
| ASMM9PARTA049878         | AK054344         | 0.024687165 | 0.485430107 | down |
| ASMM9PARTA016460         | Scnm1            | 0.003497421 | 0.291113001 | down |
| ASMM9PARTA016460         | Scnm1            | 0.003497421 | 0.291113001 | down |
| ASMM9PARTA016460         | Scnm1            | 0.003497421 | 0.291113001 | down |
| ASMM9PARTA046753         | AK148130         | 0.038980793 | 0.489715149 | down |
| ASMM9PARTA018074         | Gm15825          | 0.037588257 | 0.327626731 | down |
| ASMM9PARTA045237         | Wbscr25          | 0.04906466  | 0.341883731 | down |
| ASMM9PARTA009221         |                  | 0.031619318 | 0.448748098 | down |
| ASMM9PARTA000459         |                  | 0.022845458 | 0.341923793 | down |
| ASMM9PARTA010972         | Mup-ps6          | 0.00017     | 0.378956787 | down |
| ASMM9PARTA007969         |                  | 0.042256314 | 0.478996001 | down |
| MM9LINC RNAEXON10686+ P1 | mouselincRNA1112 | 0.008306421 | 0.427966626 | down |
| ASMM9PARTA001994         |                  | 0.007103732 | 0.441272188 | down |
| ASMM9PARTA001994         |                  | 0.007103732 | 0.441272188 | down |
| BY303620 P1              | humanlincRNA0185 | 0.025144543 | 0.247526897 | down |
| ASMM9PARTA010242         | Gm13303          | 0.00206964  | 0.472094851 | down |
| ASMM9PARTA008294         |                  | 0.036973476 | 0.381051643 | down |
| CUST 930 PI426073487     | uc.451           | 0.001019414 | 0.334900825 | down |
| ASMM9PARTA015024         | 1700084C06Rik    | 0.00405092  | 0.435887489 | down |
| ASMM9PARTA015024         | 1700084C06Rik    | 0.00405092  | 0.435887489 | down |
| ASMM9PARTA015024         | 1700084C06Rik    | 0.00405092  | 0.435887489 | down |
| ASMM9PARTA004720         |                  | 0.003627082 | 0.281434582 | down |
| ASMM9PARTA049717         | AK054442         | 0.04830087  | 0.34250093  | down |
| MM9LINC RNAEXON10980- P1 | mouselincRNA0870 | 0.017233474 | 0.262477133 | down |
| ASMM9PARTA018910         | RP24-354E11.1    | 0.002419276 | 0.490134812 | down |
| ASMM9PARTA002885         |                  | 0.000145    | 0.26056117  | down |
| ASMM9PARTA051544         | AK149842         | 0.04774288  | 0.473746216 | down |
| humanlincRNA0563+ P1     | humanlincRNA0563 | 0.030669505 | 0.396400902 | down |
| ASMM9PARTA008695         |                  | 0.011885835 | 0.169646496 | down |
| ASMM9PARTA002592         |                  | 0.011317737 | 0.489475542 | down |
| BY230763 P1              | mouselincRNA0359 | 0.01940859  | 0.489401329 | down |
| ASMM9PARTA004722         |                  | 0.0000285   | 0.41771077  | down |
| ASMM9PARTA051071         | AK041267         | 0.018018754 | 0.449932116 | down |
| ASMM9PARTA014155         | 9330111N05Rik    | 0.005453904 | 0.393932184 | down |
| ASMM9PARTA002617         |                  | 0.029633755 | 0.328758711 | down |
| ASMM9PARTA009030         |                  | 0.002954771 | 0.354516598 | down |
| ASMM9PARTA015481         | C030037D09Rik    | 0.0000856   | 0.470896878 | down |
| ASMM9PARTA015481         | C030037D09Rik    | 0.0000856   | 0.470896878 | down |
| ASMM9PARTA001738         |                  | 0.00000287  | 0.03470293  | down |
| BC025201 P1              | mouselincRNA0389 | 0.011639745 | 0.386186257 | down |
| ASMM9PARTA049940         | DQ687153         | 0.000000632 | 0.438451668 | down |
| ASMM9PARTA006426         |                  | 0.00061     | 0.311727471 | down |
| ASMM9PARTA051168         | AK040058         | 0.005162951 | 0.376838226 | down |
| mouselincRNA1626+ P1     | mouselincRNA1626 | 0.001683128 | 0.322159572 | down |
| ASMM9PARTA001615         |                  | 0.0000954   | 0.466553045 | down |

|                         |                  |             |             |      |
|-------------------------|------------------|-------------|-------------|------|
| MM9LINCRNAEXON10453- P1 | mouselincRNA1287 | 0.01703895  | 0.462398195 | down |
| humanlincRNA2212- P1    | humanlincRNA2212 | 0.000672    | 0.404965902 | down |
| ASMM9PARTA006964        |                  | 0.000591    | 0.353772292 | down |
| ASMM9PARTA006929        |                  | 0.006582165 | 0.235152888 | down |
| ASMM9PARTA003873        |                  | 0.016945459 | 0.49061334  | down |
| ASMM9PARTA019819        | RP23-122J17.9    | 0.00000168  | 0.183313184 | down |
| ASMM9PARTA010868        | Gm14868          | 0.017027851 | 0.46902674  | down |
| ASMM9PARTA045965        | Gm7271           | 0.008372348 | 0.357834244 | down |
| mouselincRNA0166- P1    | mouselincRNA0166 | 0.042414196 | 0.328897947 | down |
| humanlincRNA0588+ P1    | humanlincRNA0588 | 0.002251251 | 0.377420373 | down |
| ASMM9PARTA000389        |                  | 0.04213884  | 0.186569033 | down |
| ASMM9PARTA003829        |                  | 0.022246433 | 0.486559523 | down |
| ASMM9PARTA014590        | 4930506C21Rik    | 0.0000244   | 0.448390983 | down |
| ASMM9PARTA014590        | 4930506C21Rik    | 0.0000244   | 0.448390983 | down |
| ASMM9PARTA046008        | AU019990         | 0.002397055 | 0.407011224 | down |
| ASMM9PARTA012618        | Gm12504          | 0.009183766 | 0.464597702 | down |
| ASMM9PARTA015284        | AI314831         | 0.000541    | 0.485814815 | down |
| ASMM9PARTA016496        | A630031M04Rik    | 0.00000875  | 0.405608199 | down |
| ASMM9PARTA001674        |                  | 0.0000169   | 0.390314319 | down |
| ASMM9PARTA000534        |                  | 0.000571    | 0.223818947 | down |
| ASMM9PARTA003905        |                  | 0.0000184   | 0.466658575 | down |
| ASMM9PARTA007668        |                  | 0.002011493 | 0.360835701 | down |
| CUST_896_PI426073487    | uc.417           | 0.020961627 | 0.367770073 | down |
| ASMM9PARTA008035        |                  | 0.030102266 | 0.47106908  | down |
| ASMM9PARTA018337        | 4930428N03Rik    | 0.008029678 | 0.241634551 | down |
| ASMM9PARTA017215        | 1500002F19Rik    | 0.0000754   | 0.29998977  | down |
| BC156060 P1             | mouselincRNA1038 | 0.0000957   | 0.477500533 | down |
| BC156060 P1             | mouselincRNA1038 | 0.0000957   | 0.477500533 | down |
| BC156060 P1             | mouselincRNA1038 | 0.0000957   | 0.477500533 | down |
| BC156060 P1             | mouselincRNA1038 | 0.0000957   | 0.477500533 | down |
| BC156060 P1             | mouselincRNA1038 | 0.0000957   | 0.477500533 | down |
| ASMM9PARTA000466        |                  | 0.04625773  | 0.25759035  | down |
| MM9LINCRNAEXON10875+ P1 |                  | 0.000031    | 0.33696369  | down |
| ASMM9PARTA017438        | Gm11940          | 0.000000158 | 0.36170813  | down |
| AK133000 P1             | mouselincRNA1340 | 0.015340349 | 0.399196338 | down |
| ASMM9PARTA000567        |                  | 0.007308432 | 0.47430968  | down |
| CUST_744_PI426073487    | uc.265           | 0.009108285 | 0.449108042 | down |
| CUST_744_PI426073487    | uc.265           | 0.009108285 | 0.449108042 | down |
| CUST_417_PI426073487    | uc.419           | 0.00888963  | 0.441513209 | down |
| CUST_417_PI426073487    | uc.419           | 0.00888963  | 0.441513209 | down |
| ASMM9PARTA011383        | Gm12550          | 0.04315498  | 0.374331869 | down |
| ASMM9PARTA046888        | AK140919         | 0.007853717 | 0.327055653 | down |
| ASMM9PARTA046888        | AK140919         | 0.007853717 | 0.327055653 | down |
| ASMM9PARTA046888        | AK140919         | 0.007853717 | 0.327055653 | down |
| ASMM9PARTA046888        | AK140919         | 0.007853717 | 0.327055653 | down |
| ASMM9PARTA046888        | AK140919         | 0.007853717 | 0.327055653 | down |
| ASMM9PARTA048619        | AK043286         | 0.000663    | 0.329969732 | down |
| ASMM9PARTA048619        | AK043286         | 0.000663    | 0.329969732 | down |
| ASMM9PARTA048619        | AK043286         | 0.000663    | 0.329969732 | down |
| ASMM9PARTA015461        | BC024582         | 0.03336372  | 0.458112653 | down |
| ASMM9PARTA051421        | AK007249         | 0.000925    | 0.316565593 | down |
| ASMM9PARTA009795        | Gm13775          | 0.00000602  | 0.193723588 | down |
| CUST_377_PI426073487    | uc.379           | 0.000559    | 0.248450026 | down |
| ASMM9PARTA049969        | Gnpda2           | 0.003828351 | 0.395382377 | down |
| ASMM9PARTA049969        | Gnpda2           | 0.003828351 | 0.395382377 | down |
| CUST_797_PI426073487    | uc.318           | 0.045477662 | 0.454628734 | down |
| CUST_797_PI426073487    | uc.318           | 0.045477662 | 0.454628734 | down |
| CUST_797_PI426073487    | uc.318           | 0.045477662 | 0.454628734 | down |

|                         |                  |             |             |      |
|-------------------------|------------------|-------------|-------------|------|
| ASMM9PARTA004381        |                  | 0.005547478 | 0.413752196 | down |
| ASMM9PARTA000860        |                  | 0.03906888  | 0.359682653 | down |
| ASMM9PARTA013178        | Gm13300          | 0.0000814   | 0.448011753 | down |
| ASMM9PARTA050392        | M34473           | 0.00000928  | 0.469587781 | down |
| ASMM9PARTA004363        |                  | 0.027164806 | 0.199458371 | down |
| ASMM9PARTA017284        | Gm16762          | 0.002006253 | 0.417357567 | down |
| ASMM9PARTA011773        | Gm12135          | 0.043920394 | 0.484771721 | down |
| ASMM9PARTA017777        | 2900041M22Rik    | 0.001522013 | 0.336594372 | down |
| ASMM9PARTA051011        | Pgls             | 0.004726845 | 0.236951552 | down |
| ASMM9PARTA051011        | Pgls             | 0.004726845 | 0.236951552 | down |
| MM9LINCRNAEXON11018- P1 | mouse1incRNA0899 | 0.010887366 | 0.479367657 | down |
| mouse1incRNA0085+ P1    | mouse1incRNA0085 | 0.024133481 | 0.464372204 | down |
| MM9LINCRNAEXON10562+ P1 | mouse1incRNA1192 | 0.016407315 | 0.473812097 | down |
| ASMM9PARTA013455        | Gm13471          | 0.012231304 | 0.427353441 | down |
| ASMM9PARTA019503        | RP24-252L3.5     | 0.015589444 | 0.277631281 | down |
| ASMM9PARTA051419        | Kirrel3          | 0.025322517 | 0.425542164 | down |
| ASMM9PARTA051419        | Kirrel3          | 0.025322517 | 0.425542164 | down |
| ASMM9PARTA051419        | Kirrel3          | 0.025322517 | 0.425542164 | down |
| ASMM9PARTA051419        | Kirrel3          | 0.025322517 | 0.425542164 | down |
| ASMM9PARTA051419        | Kirrel3          | 0.025322517 | 0.425542164 | down |
| ASMM9PARTA008003        |                  | 0.00289244  | 0.467207151 | down |
| ASMM9PARTA000244        |                  | 0.026880158 | 0.292231721 | down |
| ASMM9PARTA009486        |                  | 0.000385    | 0.424049366 | down |
| CUST 848 PI426073487    | uc.369           | 0.013055729 | 0.482278856 | down |
| CUST 508 PI426073487    | uc.28            | 0.000245    | 0.228862526 | down |
| CUST 508 PI426073487    | uc.28            | 0.000245    | 0.228862526 | down |
| CUST 508 PI426073487    | uc.28            | 0.000245    | 0.228862526 | down |
| ASMM9PARTA008203        |                  | 0.00785283  | 0.478118318 | down |
| ASMM9PARTA005439        |                  | 0.016870432 | 0.450043972 | down |
| human1incRNA0919+ P1    | human1incRNA0919 | 0.004129909 | 0.49452296  | down |
| CUST 76 PI426409190     | Mup-ps11         | 0.00000575  | 0.399995808 | down |
| CUST 76 PI426409190     | Mup-ps11         | 0.00000575  | 0.399995808 | down |
| ASMM9PARTA005424        |                  | 0.009303918 | 0.344231117 | down |
| ASMM9PARTA017021        | Gm13003          | 0.000126    | 0.488492342 | down |
| ASMM9PARTA004975        |                  | 0.003536218 | 0.478789299 | down |
| ASMM9PARTA045468        | 5330413P13Rik    | 0.0000897   | 0.491909128 | down |
| ASMM9PARTA012454        | Gm13230          | 0.000152    | 0.470551078 | down |
| ASMM9PARTA000688        |                  | 0.011740047 | 0.472755793 | down |
| ASMM9PARTA047600        | AK040806         | 0.004653141 | 0.435021795 | down |
| mouse1incRNA1300+ P1    | mouse1incRNA1300 | 0.046768308 | 0.493239414 | down |
| ASMM9PARTA046216        | AK158974         | 0.00142486  | 0.327664433 | down |
| ASMM9PARTA047221        | AK040557         | 0.002129852 | 0.449416994 | down |
| ASMM9PARTA047221        | AK040557         | 0.002129852 | 0.449416994 | down |
| ASMM9PARTA047221        | AK040557         | 0.002129852 | 0.449416994 | down |
| ASMM9PARTA004636        |                  | 0.04727351  | 0.484398118 | down |
| ASMM9PARTA046625        | AK145253         | 0.007752333 | 0.496677969 | down |
| ASMM9PARTA014138        | Gm15345          | 0.01325016  | 0.368988917 | down |
| mouse1incRNA1466+ P1    | mouse1incRNA1466 | 0.000717    | 0.421701608 | down |
| ASMM9PARTA011946        | Mup-ps10         | 0.000012    | 0.303728298 | down |
| ASMM9PARTA019132        | 9230115E21Rik    | 0.000000618 | 0.362249409 | down |
| ASMM9PARTA004530        |                  | 0.025478927 | 0.34104423  | down |
| ASMM9PARTA000326        |                  | 0.009440683 | 0.396344515 | down |
| ASMM9PARTA019018        | 5830444B04Rik    | 0.0000116   | 0.12745271  | down |
| ASMM9PARTA019018        | 5830444B04Rik    | 0.0000116   | 0.12745271  | down |
| MM9LINCRNAEXON10630- P1 | mouse1incRNA1245 | 0.002806337 | 0.451422575 | down |
| CUST 161 PI426409190    |                  | 0.000000901 | 0.322184317 | down |
| ASMM9PARTA003657        |                  | 0.044176843 | 0.471255244 | down |

|                          |                  |             |             |      |
|--------------------------|------------------|-------------|-------------|------|
| ASMM9PARTA008265         |                  | 0.006280002 | 0.459559352 | down |
| ASMM9PARTA047612         | AK039634         | 1.68E-08    | 0.040053398 | down |
| ASMM9PARTA048690         | AK021048         | 0.00000481  | 0.399356158 | down |
| ASMM9PARTA048690         | AK021048         | 0.00000481  | 0.399356158 | down |
| ASMM9PARTA048690         | AK021048         | 0.00000481  | 0.399356158 | down |
| mouse1incRNA0995+ P1     | mouse1incRNA0995 | 0.044454772 | 0.457983138 | down |
| ASMM9PARTA005211         |                  | 0.00152138  | 0.468623699 | down |
| ASMM9PARTA049041         | Apba1            | 0.00631954  | 0.312715559 | down |
| ASMM9PARTA003926         |                  | 6.12E-09    | 0.023661045 | down |
| ASMM9PARTA049764         | Slc22a15         | 0.000707    | 0.457808338 | down |
| ASMM9PARTA019394         | AC113955.1       | 0.005920602 | 0.456519903 | down |
| human1incRNA0212- P1     | human1incRNA0212 | 0.005693027 | 0.373063335 | down |
| ASMM9PARTA005997         |                  | 0.025030004 | 0.478144813 | down |
| ASMM9PARTA050343         | Ncf1             | 0.026508087 | 0.487943406 | down |
| ASMM9PARTA013275         | Gm14589          | 0.009195147 | 0.370922454 | down |
| ASMM9PARTA012323         | Olfir269-ps1     | 0.039926402 | 0.451308098 | down |
| ASMM9PARTA008374         |                  | 0.005053575 | 0.411963723 | down |
| ASMM9PARTA000819         |                  | 0.037536673 | 0.383416059 | down |
| ASMM9PARTA000984         |                  | 0.042925965 | 0.397053577 | down |
| ASMM9PARTA011888         | Gm13408          | 0.00000195  | 0.347003574 | down |
| ASMM9PARTA008301         |                  | 0.013398387 | 0.326432262 | down |
| ASMM9PARTA018654         | Ear-ps9          | 0.000000213 | 0.30711363  | down |
| ASMM9PARTA008817         |                  | 0.008489249 | 0.370480705 | down |
| ASMM9PARTA048567         | wtap             | 0.0000487   | 0.473886081 | down |
| human1incRNA0849- P1     | human1incRNA0849 | 0.012689612 | 0.314745463 | down |
| MM9LINC RNAEXON10820+ P1 | mouse1incRNA0975 | 0.012246273 | 0.493949123 | down |
| human1incRNA1948- P1     | human1incRNA1948 | 0.002140137 | 0.429786527 | down |
| ASMM9PARTA013585         | Gm13935          | 0.0000232   | 0.200903301 | down |
| ASMM9PARTA015352         | Gm14818          | 0.026708286 | 0.268350635 | down |
| ASMM9PARTA045609         | Gm10649          | 0.003220451 | 0.391416043 | down |
| ASMM9PARTA011365         | Gm11900          | 0.04270818  | 0.381095789 | down |
| ASMM9PARTA051041         | Scoc             | 0.000505    | 0.056998124 | down |
| ASMM9PARTA051041         | Scoc             | 0.000505    | 0.056998124 | down |
| ASMM9PARTA013210         | Gm13220          | 0.045839448 | 0.44551594  | down |
| ASMM9PARTA049926         | Gfi1             | 0.022735307 | 0.434794613 | down |
| ASMM9PARTA016984         | Gm11963          | 0.001052138 | 0.371209372 | down |
| ASMM9PARTA046383         | AK142161         | 0.0000302   | 0.49230047  | down |
| human1incRNA1634+ P1     | human1incRNA1634 | 0.033149805 | 0.334557479 | down |
| ASMM9PARTA009981         | Olfir1503-ps1    | 0.028066704 | 0.376838397 | down |
| ASMM9PARTA008484         |                  | 0.034575436 | 0.291049082 | down |
| ASMM9PARTA010625         | Gm15087          | 0.000746    | 0.236457958 | down |
| ASMM9PARTA046605         | AK143813         | 0.005582141 | 0.44550544  | down |
| ASMM9PARTA015097         | Gm11775          | 0.015863145 | 0.495998286 | down |
| ASMM9PARTA007713         |                  | 0.026454136 | 0.477573278 | down |
| MM9LINC RNAEXON11088+ P1 | mouse1incRNA0819 | 0.035720468 | 0.39014535  | down |
| ASMM9PARTA050736         | U20367           | 0.009414643 | 0.476952055 | down |
| human1incRNA1715- P1     | human1incRNA1715 | 0.016344972 | 0.385971525 | down |
| ASMM9PARTA002405         |                  | 0.003196637 | 0.481768391 | down |
| ASMM9PARTA015348         | Gm15271          | 0.037194923 | 0.271406687 | down |
| human1incRNA2014+ P1     | human1incRNA2014 | 0.044148322 | 0.43040998  | down |
| ASMM9PARTA012833         | Olfir1174-ps     | 0.026136344 | 0.283101566 | down |
| ASMM9PARTA045668         | Hhat1            | 0.011752047 | 0.230318957 | down |
| MM9LINC RNAEXON11908- P1 | mouse1incRNA0173 | 0.024799671 | 0.493092975 | down |
| ASMM9PARTA016295         | Gm15478          | 0.000244    | 0.439029648 | down |
| ASMM9PARTA016295         | Gm15478          | 0.000244    | 0.439029648 | down |
| ASMM9PARTA051072         | AK019737         | 0.00000142  | 0.437852603 | down |
| ASMM9PARTA051139         | NR_001461        | 0.003234156 | 0.395349051 | down |

|                          |                 |             |             |      |
|--------------------------|-----------------|-------------|-------------|------|
| CUST 21 PI426073487      | uc.22           | 0.018535253 | 0.38228157  | down |
| ASMM9PARTA010260         | Mup-ps2         | 0.000648    | 0.300431128 | down |
| ASMM9PARTA013915         | Gm11648         | 0.000414    | 0.252318364 | down |
| ASMM9PARTA013915         | Gm11648         | 0.000414    | 0.252318364 | down |
| ASMM9PARTA002438         |                 | 0.04776144  | 0.483157072 | down |
| ASMM9PARTA050751         | Usp29           | 0.01259547  | 0.37211868  | down |
| ASMM9PARTA050751         | Usp29           | 0.01259547  | 0.37211868  | down |
| ASMM9PARTA049624         | BC048720        | 0.00000275  | 0.366010775 | down |
| CUST 240 PI426073487     | uc.242          | 0.032857224 | 0.309875135 | down |
| ASMM9PARTA007848         |                 | 0.006486828 | 0.44319332  | down |
| ASMM9PARTA007814         |                 | 0.015760263 | 0.419476812 | down |
| ASMM9PARTA019073         | Gm15024         | 0.016301576 | 0.333184655 | down |
| mouse1ncRNA1555+ P1      | mouse1ncRNA1555 | 0.01637528  | 0.427548817 | down |
| ASMM9PARTA013911         | 4933439C10Rik   | 0.004084464 | 0.452106136 | down |
| ASMM9PARTA013911         | 4933439C10Rik   | 0.004084464 | 0.452106136 | down |
| ASMM9PARTA018537         | AC125223.1      | 0.020755399 | 0.311302546 | down |
| ASMM9PARTA018537         | AC125223.1      | 0.020755399 | 0.311302546 | down |
| ASMM9PARTA018537         | AC125223.1      | 0.020755399 | 0.311302546 | down |
| ASMM9PARTA010967         | Gm12392         | 0.04533273  | 0.291607898 | down |
| human1ncRNA0338- P1      | human1ncRNA0338 | 0.000415    | 0.395706083 | down |
| CUST 306 PI426073487     | uc.308          | 0.03678968  | 0.385313469 | down |
| CUST 306 PI426073487     | uc.308          | 0.03678968  | 0.385313469 | down |
| ASMM9PARTA008070         |                 | 0.03284476  | 0.364814502 | down |
| ASMM9PARTA047208         | AK217959        | 0.0000211   | 0.31473209  | down |
| human1ncRNA0539+ P1      | human1ncRNA0539 | 0.006089769 | 0.407030624 | down |
| ASMM9PARTA006812         |                 | 0.000361    | 0.389461484 | down |
| ASMM9PARTA048270         | AK213404        | 0.0347217   | 0.321092165 | down |
| ASMM9PARTA046268         | AK020188        | 0.000875    | 0.409055122 | down |
| ASMM9PARTA051177         | AK015741        | 0.002482541 | 0.41219186  | down |
| ASMM9PARTA047850         | AK076852        | 0.000247    | 0.256906019 | down |
| human1ncRNA0120- P1      | human1ncRNA0120 | 0.012510297 | 0.411163382 | down |
| ASMM9PARTA015249         | Gm15638         | 0.03364441  | 0.323691188 | down |
| MM9LINC RNAEXON10276- P1 | mouse1ncRNA1493 | 0.03576854  | 0.353309125 | down |
| ASMM9PARTA011830         | Mup-ps3         | 0.00714584  | 0.448708209 | down |
| ASMM9PARTA048043         | AK086168        | 0.007705907 | 0.4987566   | down |
| ASMM9PARTA008735         |                 | 0.0000303   | 0.489499238 | down |
| MM9LINC RNAEXON11073+ P1 | mouse1ncRNA0818 | 0.039999366 | 0.375429491 | down |
| ASMM9PARTA051476         | AK043361        | 0.000058    | 0.459726425 | down |
| ASMM9PARTA046705         | AK083030        | 0.00000302  | 0.034131911 | down |
| MM9LINC RNAEXON10944- P1 | mouse1ncRNA0866 | 0.00930478  | 0.450036619 | down |
| MM9LINC RNAEXON10205+ P1 | mouse1ncRNA1474 | 0.010722918 | 0.464065871 | down |
| ASMM9PARTA014791         | Gm15787         | 0.01077029  | 0.285222765 | down |
| ASMM9PARTA014791         | Gm15787         | 0.01077029  | 0.285222765 | down |
| ASMM9PARTA050201         | AK007223        | 0.002777367 | 0.473155298 | down |
| ASMM9PARTA004550         |                 | 0.015151206 | 0.319327899 | down |
| ASMM9PARTA004550         |                 | 0.015151206 | 0.319327899 | down |
| ASMM9PARTA050312         | AK006413        | 0.034992956 | 0.449767432 | down |
| ASMM9PARTA005614         |                 | 0.004894454 | 0.429567196 | down |
| CUST 618 PI426073487     | uc.139          | 0.016790235 | 0.395208727 | down |
| AW121278 P1              | human1ncRNA1024 | 0.000264    | 0.410097486 | down |
| ASMM9PARTA003596         |                 | 0.008902524 | 0.418853799 | down |
| CUST 176 PI426073487     | uc.178          | 0.01183932  | 0.268395203 | down |
| ASMM9PARTA015903         | 4930505O20Rik   | 0.04516106  | 0.291150685 | down |
| ASMM9PARTA046565         | AK085275        | 0.008945847 | 0.470727127 | down |
| ASMM9PARTA018881         | Gm11101         | 0.0000607   | 0.408859662 | down |
| ASMM9PARTA006438         |                 | 0.011015652 | 0.414833552 | down |
| MM9LINC RNAEXON11843+ P1 | mouse1ncRNA0273 | 0.039404813 | 0.24381211  | down |

|                           |                  |             |             |      |
|---------------------------|------------------|-------------|-------------|------|
| humanlincRNA2101- P1      | humanlincRNA2101 | 0.004830487 | 0.326456313 | down |
| ASMM9PARTA002244          |                  | 0.006534329 | 0.472801726 | down |
| ASMM9PARTA046413          | AK040222         | 0.0171797   | 0.360853058 | down |
| MM9LINC RNA EXON11963+ P1 |                  | 0.001109784 | 0.386536605 | down |
| ASMM9PARTA018396          | Gm16404          | 0.01583773  | 0.39356747  | down |
| ASMM9PARTA019605          | BC006965         | 0.005342174 | 0.431606454 | down |
| ASMM9PARTA047394          | 2410018L13Rik    | 0.000808    | 0.498760257 | down |
| ASMM9PARTA001725          |                  | 0.04035243  | 0.499409897 | down |
| ASMM9PARTA005441          |                  | 0.010374523 | 0.311384145 | down |
| ASMM9PARTA010261          | Gm10601          | 0.000123    | 0.444332769 | down |
| ASMM9PARTA050163          | BC064108         | 0.00000299  | 0.189867771 | down |
| ASMM9PARTA050163          | BC064108         | 0.00000299  | 0.189867771 | down |
| CUST 352 PI426073487      | uc.354           | 0.012781641 | 0.343607212 | down |
| BY666395 P1               | humanlincRNA1447 | 0.009175375 | 0.495153316 | down |
| ASMM9PARTA047296          | AK035085         | 0.023991171 | 0.486427221 | down |
| ASMM9PARTA046203          | AK138346         | 0.000126    | 0.44220152  | down |
| ASMM9PARTA015743          | Gm16885          | 0.019588608 | 0.4030407   | down |
| ASMM9PARTA015743          | Gm16885          | 0.019588608 | 0.4030407   | down |
| CA464087 P1               | mouselincRNA0285 | 0.024444764 | 0.430259552 | down |
| ASMM9PARTA006626          |                  | 0.00000735  | 0.218425621 | down |
| ASMM9PARTA050618          | AK007376         | 0.000423    | 0.271595399 | down |
| ASMM9PARTA009360          | Gm8935           | 0.0000727   | 0.497841781 | down |
| ASMM9PARTA009936          | Mup-ps7          | 0.0000041   | 0.323531305 | down |
| ASMM9PARTA012215          | Mup-ps19         | 0.00000108  | 0.134253327 | down |
| humanlincRNA2077+ P1      | humanlincRNA2077 | 0.009696126 | 0.463311669 | down |
| MM9LINC RNA EXON10811+ P1 | mouselincRNA0961 | 0.001297182 | 0.446342531 | down |
| ASMM9PARTA048115          | AK077272         | 0.039455798 | 0.40453225  | down |
| ASMM9PARTA047918          | AK014089         | 0.0000294   | 0.386305411 | down |
| ASMM9PARTA010235          | Gm13300          | 0.000089    | 0.410689458 | down |
| CUST 103 PI426409190      | AC087559.5       | 0.0000727   | 0.475954765 | down |
| ASMM9PARTA004298          |                  | 0.00000376  | 0.218935811 | down |
| MM9LINC RNA EXON10635- P1 | mouselincRNA1245 | 0.007669432 | 0.3648854   | down |
| ASMM9PARTA016186          | Gm14257          | 0.045413513 | 0.387348321 | down |
| ASMM9PARTA012583          | Gm15368          | 0.042070813 | 0.442027458 | down |
| ASMM9PARTA012583          | Gm15368          | 0.042070813 | 0.442027458 | down |
| ASMM9PARTA012583          | Gm15368          | 0.042070813 | 0.442027458 | down |
| ASMM9PARTA012583          | Gm15368          | 0.042070813 | 0.442027458 | down |
| ASMM9PARTA012583          | Gm15368          | 0.042070813 | 0.442027458 | down |
| ASMM9PARTA012583          | Gm15368          | 0.042070813 | 0.442027458 | down |
| ASMM9PARTA009906          | A630012P03Rik    | 0.020752816 | 0.459634549 | down |
| humanlincRNA1315- P1      | humanlincRNA1315 | 0.016093252 | 0.454754166 | down |
| CUST 314 PI426073487      | uc.316           | 0.014083947 | 0.4444209   | down |
| ASMM9PARTA016224          | 4930412C18Rik    | 0.00000115  | 0.395896862 | down |
| MM9LINC RNA EXON11745+ P1 | mouselincRNA0230 | 0.00775124  | 0.422867043 | down |
| MM9LINC RNA EXON11042- P1 | mouselincRNA0924 | 0.032320537 | 0.453269172 | down |
| ASMM9PARTA014317          | Gm14120          | 0.00607155  | 0.477571203 | down |
| ASMM9PARTA015931          | Mup-ps2          | 0.002759554 | 0.295455565 | down |
| ASMM9PARTA051808          |                  | 0.006495231 | 0.391673952 | down |
| ASMM9PARTA006938          |                  | 0.00106378  | 0.424485513 | down |
| ASMM9PARTA047717          | AK138307         | 0.0000369   | 0.287666017 | down |
| ASMM9PARTA010666          | Gm13890          | 0.031049656 | 0.372490587 | down |
| ASMM9PARTA047548          | AK016040         | 0.029687358 | 0.313830149 | down |
| ASMM9PARTA002086          |                  | 0.0000126   | 0.365683861 | down |
| ASMM9PARTA003790          |                  | 0.007693226 | 0.47295602  | down |
| ASMM9PARTA048192          | AK080258         | 0.025654526 | 0.326510632 | down |
| MM9LINC RNA EXON10774- P1 | mouselincRNA1143 | 0.002725833 | 0.49690883  | down |
| humanlincRNA1204+ P1      | humanlincRNA1204 | 0.047498424 | 0.434723902 | down |
