# Supplementary material for: Microarray Profile of Long Noncoding RNA and Messenger RNA Expression in a Model of Alzheimer’s Disease
Source: MDPI journal article supplement (doi:10.3390/life10050064), 2020-05-14
Supplement: s1 [file s1]

# Supplementary

## Microarray Profile of Long Noncoding RNA and Messenger RNA Expression in a Model of Alzheimer's Disease

Linlin Wang <sup>†</sup>, Li Zeng <sup>†</sup>, Hailun Jiang, Zhuorong Li <sup>\*</sup> and Rui Liu <sup>\*</sup>

Institute of Medicinal Biotechnology, Chinese Academy of Medical Sciences and Peking Union Medical College, Beijing 100050, China; wanglinlin@wfmc.edu.cn (L.W.); zengsheng@imb.pumc.edu.cn (L.Z.); jianghailun@imb.pumc.edu.cn (H.J.)

<sup>\*</sup> Correspondence: lizhourong@imb.pumc.edu.cn (Z.L.); +86-10-8352017; .liurui@imb.pumc.edu.cn (R.L.); Tel.: +86-10-67087731

**Table S1.** Differently expressed lncRNAs in the brain of 1-month-old APP/PS1 mice compared with age-matched WT mice.

| Probe Name              | Gene Symbol      | p-Value     | Fold Change | Regulation |
|-------------------------|------------------|-------------|-------------|------------|
| MM9LINCRNAEXON11653- P1 | mouselincRNA0297 | 0.03853617  | 2.4391737   | up         |
| ASMM9PARTA018633        | AL732590.2       | 0.002783807 | 2.15185     | up         |
| ASMM9PARTA018633        | AL732590.2       | 0.002783807 | 2.15185     | up         |
| ASMM9PARTA017102        | A230108P19Rik    | 0.001155623 | 2.6593003   | up         |
| mouselincRNA0294- P1    | mouselincRNA0294 | 0.024343088 | 2.5895295   | up         |
| MM9LINCRNAEXON11250- P1 | mouselincRNA0737 | 0.001355704 | 3.430497    | up         |
| humanlincRNA1590+ P1    | humanlincRNA1590 | 0.0000437   | 5.9778385   | up         |
| ASMM9PARTA018203        | NRON.1           | 0.003656608 | 3.9517019   | up         |
| humanlincRNA2213+ P1    | humanlincRNA2213 | 0.017903363 | 2.0292795   | up         |
| MM9LINCRNAEXON11529- P1 | mouselincRNA0380 | 0.001012912 | 2.3298893   | up         |
| ASMM9PARTA016545        | Gm16706          | 0.003379951 | 3.3808007   | up         |
| ASMM9PARTA016545        | Gm16706          | 0.003379951 | 3.3808007   | up         |
| ASMM9PARTA006499        |                  | 0.006989687 | 2.7657256   | up         |
| ASMM9PARTA045030        | Pisd-ps3         | 0.0000905   | 2.024496    | up         |
| ASMM9PARTA002774        |                  | 0.0000651   | 2.2739878   | up         |
| ASMM9PARTA002774        |                  | 0.0000651   | 2.2739878   | up         |
| ASMM9PARTA005433        |                  | 0.003971536 | 2.0467112   | up         |
| ASMM9PARTA005433        |                  | 0.003971536 | 2.0467112   | up         |
| ASMM9PARTA005433        |                  | 0.003971536 | 2.0467112   | up         |
| ASMM9PARTA005433        |                  | 0.003971536 | 2.0467112   | up         |
| ASMM9PARTA010873        | Gm15382          | 0.000167    | 2.064617    | up         |
| mouselincRNA0394- P1    | mouselincRNA0394 | 0.002045447 | 3.7254975   | up         |
| ASMM9PARTA015256        | 9130017K11Rik    | 0.003683128 | 4.075082    | up         |
| ASMM9PARTA015256        | 9130017K11Rik    | 0.003683128 | 4.075082    | up         |
| ASMM9PARTA046970        | BC006965         | 0.0000554   | 4.5558357   | up         |
| ASMM9PARTA009122        |                  | 0.037647396 | 2.2806401   | up         |
| ASMM9PARTA045330        | Gm11149          | 0.0000477   | 2.4906142   | up         |
| ASMM9PARTA045330        | Gm11149          | 0.0000477   | 2.4906142   | up         |

|                         |                  |             |           |    |
|-------------------------|------------------|-------------|-----------|----|
| ASMM9PARTA045330        | Gm11149          | 0.0000477   | 2.4906142 | up |
| CA465684 P1             | mouselincRNA0967 | 0.0000159   | 3.0758736 | up |
| ASMM9PARTA014137        | Gm12347          | 0.038847048 | 2.133187  | up |
| ASMM9PARTA047362        | BC064451         | 0.000171    | 2.071279  | up |
| ASMM9PARTA046506        | mKIAA4192        | 0.03495005  | 3.2468708 | up |
| ASMM9PARTA002041        |                  | 0.040164176 | 5.1750097 | up |
| ASMM9PARTA004295        |                  | 0.001527703 | 2.9495368 | up |
| ASMM9PARTA009911        | 4933401B06Rik    | 0.003712294 | 2.6109204 | up |
| CJ058094 P1             | mouselincRNA1482 | 0.007969993 | 2.0391238 | up |
| CJ058094 P1             | mouselincRNA1482 | 0.007969993 | 2.0391238 | up |
| CJ058094 P1             | mouselincRNA1482 | 0.007969993 | 2.0391238 | up |
| ASMM9PARTA013368        | Olfr1027-ps1     | 0.028849883 | 2.1941142 | up |
| ASMM9PARTA005223        |                  | 0.009152568 | 2.0864286 | up |
| ASMM9PARTA012572        | Gm13323          | 0.000122    | 2.0895674 | up |
| MM9LINCRNAEXON11396+ P1 |                  | 0.008838809 | 2.0950077 | up |
| ASMM9PARTA045345        | 9630013A20Rik    | 0.000000864 | 3.6551394 | up |
| ASMM9PARTA018592        | Gm16343          | 0.025719661 | 2.954755  | up |
| ASMM9PARTA018592        | Gm16343          | 0.025719661 | 2.954755  | up |
| ASMM9PARTA018592        | Gm16343          | 0.025719661 | 2.954755  | up |
| ASMM9PARTA018592        | Gm16343          | 0.025719661 | 2.954755  | up |
| ASMM9PARTA015766        | 9530082P21Rik    | 0.004168574 | 3.3884056 | up |
| ASMM9PARTA005159        |                  | 0.035993755 | 2.8546026 | up |
| ASMM9PARTA013083        | Gm12539          | 0.00075     | 2.0123758 | up |
| ASMM9PARTA003991        |                  | 0.000343    | 3.452115  | up |
| ASMM9PARTA014466        | Spag17-ps        | 0.041225985 | 2.3006616 | up |
| ASMM9PARTA013061        | Gm13913          | 0.000024    | 4.049263  | up |
| ASMM9PARTA000138        |                  | 0.015808158 | 2.5815477 | up |
| ASMM9PARTA008375        |                  | 0.011198638 | 2.6658108 | up |
| ASMM9PARTA005494        |                  | 0.00778921  | 3.6653523 | up |
| ASMM9PARTA013683        | Gm12037          | 0.027591476 | 4.2206707 | up |
| ASMM9PARTA007231        |                  | 0.002745976 | 3.5619643 | up |
| ASMM9PARTA016815        | Gm16534          | 0.00000966  | 2.5082474 | up |
| ASMM9PARTA017337        | 1700021L23Rik    | 0.006257789 | 2.8913448 | up |
| ASMM9PARTA007917        |                  | 0.00000385  | 5.102149  | up |
| ASMM9PARTA000849        |                  | 0.008761234 | 3.799671  | up |
| ASMM9PARTA005541        |                  | 0.017299106 | 7.057314  | up |
| ASMM9PARTA005492        |                  | 0.015809843 | 2.2901855 | up |
| ASMM9PARTA051615        | mKIAA1781        | 0.049255732 | 5.220143  | up |
| ASMM9PARTA051615        | mKIAA1781        | 0.049255732 | 5.220143  | up |
| ASMM9PARTA000911        |                  | 0.01189079  | 2.0553722 | up |
| ASMM9PARTA017280        | Gm13976          | 0.004594597 | 4.2734804 | up |
| ASMM9PARTA010969        | Gm15399          | 0.012785287 | 2.777508  | up |
| ASMM9PARTA005182        |                  | 0.01946577  | 2.05024   | up |
| MM9LINCRNAEXON11747+ P1 | mouselincRNA0230 | 0.002470979 | 2.2702074 | up |
| ASMM9PARTA006171        |                  | 0.022997985 | 2.2174146 | up |
| ASMM9PARTA014414        | 5430427M07Rik    | 0.01166787  | 4.3312845 | up |
| ASMM9PARTA018542        | AC164629.8       | 0.014509238 | 2.5523677 | up |
| humanlincRNA2028- P1    | humanlincRNA2028 | 0.006392615 | 4.0605407 | up |
| ASMM9PARTA005913        |                  | 0.03353239  | 4.2164035 | up |
| ASMM9PARTA016544        | Gm13134          | 0.000381    | 4.21255   | up |
| ASMM9PARTA016544        | Gm13134          | 0.000381    | 4.21255   | up |
| ASMM9PARTA007950        |                  | 0.025528518 | 2.468305  | up |
| humanlincRNA1576- P1    | humanlincRNA1576 | 0.00000755  | 3.3827791 | up |
| ASMM9PARTA001768        |                  | 0.014294921 | 2.2706404 | up |
| humanlincRNA1422+ P1    | humanlincRNA1422 | 0.000877    | 5.4090686 | up |
| humanlincRNA1605+ P1    | humanlincRNA1605 | 0.01659449  | 2.5616944 | up |
| MM9LINCRNAEXON10275- P1 | mouselincRNA1493 | 0.003365036 | 2.934753  | up |

|                         |                  |             |           |    |
|-------------------------|------------------|-------------|-----------|----|
| ASMM9PARTA011628        | Olfr1063-ps1     | 0.00590611  | 2.1198711 | up |
| ASMM9PARTA004846        |                  | 0.010118948 | 2.7207916 | up |
| ASMM9PARTA004846        |                  | 0.010118948 | 2.7207916 | up |
| ASMM9PARTA004846        |                  | 0.010118948 | 2.7207916 | up |
| CUST 423 PI426073487    | uc.425           | 0.000112    | 2.734947  | up |
| ASMM9PARTA017117        | Gm13847          | 0.033471078 | 9.067197  | up |
| ASMM9PARTA002726        |                  | 0.026826017 | 2.6987271 | up |
| MM9LINCRNAEXON10302- P1 | mouselincRNA1353 | 0.009161566 | 2.0896251 | up |
| ASMM9PARTA047940        | AK014435         | 0.000414    | 4.6516943 | up |
| ASMM9PARTA049301        | AK018940         | 0.03574843  | 6.1800933 | up |
| ASMM9PARTA008118        |                  | 0.047661927 | 2.3506238 | up |
| ASMM9PARTA011622        | Gm12377          | 0.0000738   | 2.1792977 | up |
| ASMM9PARTA005824        |                  | 0.03493068  | 2.3046925 | up |
| ASMM9PARTA006453        |                  | 0.010957906 | 2.9548705 | up |
| MM9LINCRNAEXON10551- P1 | mouselincRNA1185 | 0.00593149  | 2.4590445 | up |
| ASMM9PARTA046271        | BC108272         | 0.000964    | 4.4767447 | up |
| AI507909 P1             | humanlincRNA1257 | 0.000396    | 2.8773766 | up |
| ASMM9PARTA046107        | AK039957         | 0.037938744 | 2.1578417 | up |
| ASMM9PARTA005449        |                  | 0.000423    | 2.6646652 | up |
| ASMM9PARTA005449        |                  | 0.000423    | 2.6646652 | up |
| ASMM9PARTA000694        |                  | 0.001420073 | 2.284793  | up |
| ASMM9PARTA015960        | 9430065F17Rik    | 0.017808545 | 2.5310738 | up |
| ASMM9PARTA015960        | 9430065F17Rik    | 0.017808545 | 2.5310738 | up |
| ASMM9PARTA047687        | AK015470         | 0.001142327 | 2.2665412 | up |
| MM9LINCRNAEXON11061- P1 | mouselincRNA0945 | 0.03493923  | 2.1173036 | up |
| ASMM9PARTA000471        |                  | 0.008085524 | 2.287788  | up |
| ASMM9PARTA016149        | Gm15726          | 0.002023748 | 2.390047  | up |
| ASMM9PARTA016149        | Gm15726          | 0.002023748 | 2.390047  | up |
| MM9LINCRNAEXON10406- P1 | mouselincRNA1260 | 0.02519224  | 2.2607043 | up |
| ASMM9PARTA004872        |                  | 0.02106976  | 2.4793973 | up |
| ASMM9PARTA006207        |                  | 0.007572139 | 3.6399913 | up |
| ASMM9PARTA014358        | E130003G02Rik    | 0.000532    | 2.0517626 | up |
| ASMM9PARTA014358        | E130003G02Rik    | 0.000532    | 2.0517626 | up |
| ASMM9PARTA014358        | E130003G02Rik    | 0.000532    | 2.0517626 | up |
| ASMM9PARTA000492        |                  | 0.006650831 | 2.5813942 | up |
| ASMM9PARTA008992        |                  | 0.002741891 | 2.1566684 | up |
| ASMM9PARTA007865        |                  | 0.003608599 | 2.932615  | up |
| ASMM9PARTA011901        | Gm11623          | 0.012665474 | 2.1208858 | up |
| ASMM9PARTA007417        |                  | 0.003090163 | 5.209807  | up |
| ASMM9PARTA013190        | Gm7386           | 0.006763252 | 3.4498134 | up |
| ASMM9PARTA008581        |                  | 0.007435879 | 2.453574  | up |
| MM9LINCRNAEXON10455- P1 | mouselincRNA1287 | 0.02423389  | 2.5882087 | up |
| ASMM9PARTA003640        |                  | 0.004941439 | 4.5171905 | up |
| ASMM9PARTA046949        | AK150110         | 0.010360972 | 2.2313983 | up |
| mouselincRNA0133+ P1    | mouselincRNA0133 | 0.007893923 | 2.19937   | up |
| mouselincRNA1546- P1    | mouselincRNA1546 | 0.02694875  | 2.0435512 | up |
| ASMM9PARTA010114        | Gm11041          | 0.000000161 | 4.414594  | up |
| ASMM9PARTA001249        |                  | 0.0003      | 3.18866   | up |
| ASMM9PARTA018903        | Smok3c           | 0.000588    | 2.2865016 | up |
| MM9LINCRNAEXON11031- P1 | mouselincRNA0914 | 0.001849649 | 2.8037627 | up |
| BB869594 P1             | mouselincRNA1003 | 0.035452735 | 3.4142158 | up |
| ASMM9PARTA013835        | Gm12780          | 0.009454524 | 2.1172101 | up |
| ASMM9PARTA008507        |                  | 0.04051666  | 2.1475964 | up |
| ASMM9PARTA017913        | Gm12440          | 0.000415    | 2.38328   | up |
| ASMM9PARTA048877        | AK076706         | 0.001909963 | 2.009778  | up |
| ASMM9PARTA007699        |                  | 0.011515025 | 2.5529652 | up |
| ASMM9PARTA048158        | AK137010         | 0.000183    | 2.2145581 | up |

|                         |                  |             |           |    |
|-------------------------|------------------|-------------|-----------|----|
| ASMM9PARTA013980        | 2810403D21Rik    | 0.004927495 | 3.7204018 | up |
| ASMM9PARTA048349        | AK018679         | 0.000571    | 2.664696  | up |
| MM9LINCRNAEXON10681- P1 | mouselincRNA1110 | 0.000023    | 3.1860194 | up |
| ASMM9PARTA047160        | Slc38a6          | 0.019899402 | 5.269713  | up |
| ASMM9PARTA047160        | Slc38a6          | 0.019899402 | 5.269713  | up |
| ASMM9PARTA015335        | B230314M03Rik    | 0.036722288 | 2.7376027 | up |
| MM9LINCRNAEXON11226- P1 | mouselincRNA0717 | 0.004714525 | 3.757954  | up |
| ASMM9PARTA005805        |                  | 0.001833606 | 2.413141  | up |
| MM9LINCRNAEXON11010- P1 | mouselincRNA0889 | 0.017116968 | 2.1312296 | up |
| humanlincRNA0409- P1    | humanlincRNA0409 | 0.028668752 | 2.1197705 | up |
| ASMM9PARTA013023        | Gm15383          | 0.008592616 | 2.2315118 | up |
| ASMM9PARTA006284        |                  | 0.023139529 | 3.1474016 | up |
| mouselincRNA0491- P1    | mouselincRNA0491 | 0.009306679 | 2.387591  | up |
| ASMM9PARTA004071        |                  | 0.00888211  | 4.276418  | up |
| ASMM9PARTA005086        |                  | 0.019149791 | 2.1496463 | up |
| ASMM9PARTA014856        | 1810059H22Rik    | 0.010172333 | 2.085558  | up |
| humanlincRNA0970- P1    | humanlincRNA0970 | 0.026733814 | 2.0537314 | up |
| ASMM9PARTA018240        | 7SK.318          | 0.000271    | 5.1898184 | up |
| ASMM9PARTA000150        |                  | 0.04165382  | 2.678476  | up |
| ASMM9PARTA047628        | AK143833         | 0.000334    | 2.9296582 | up |
| ASMM9PARTA011791        | Gm11921          | 0.03761249  | 2.2298455 | up |
| ASMM9PARTA047844        | AK015279         | 0.00081     | 2.1478488 | up |
| ASMM9PARTA045504        | 4930583H14Rik    | 0.016456593 | 2.9131455 | up |
| ASMM9PARTA015426        | Gm14092          | 0.020735871 | 4.9228477 | up |
| ASMM9PARTA015426        | Gm14092          | 0.020735871 | 4.9228477 | up |
| ASMM9PARTA049572        | AK016731         | 0.0000165   | 3.2234983 | up |
| MM9LINCRNAEXON10775+ P1 | mouselincRNA1143 | 0.004435093 | 2.906301  | up |
| mouselincRNA0303- P1    | mouselincRNA0303 | 0.004889886 | 2.658487  | up |
| ASMM9PARTA050633        | AK006412         | 0.004353627 | 2.5914717 | up |
| ASMM9PARTA001180        |                  | 0.009087118 | 3.5569837 | up |
| ASMM9PARTA008433        |                  | 0.001083974 | 2.5229979 | up |
| ASMM9PARTA008412        |                  | 0.03948813  | 2.569691  | up |
| ASMM9PARTA007252        |                  | 0.004828085 | 2.5939534 | up |
| ASMM9PARTA003334        |                  | 0.033744946 | 3.6882799 | up |
| ASMM9PARTA009988        | 4930473A02Rik    | 0.004919326 | 2.2651217 | up |
| ASMM9PARTA009988        | 4930473A02Rik    | 0.004919326 | 2.2651217 | up |
| ASMM9PARTA009988        | 4930473A02Rik    | 0.004919326 | 2.2651217 | up |
| CUST 322 PI426073487    | uc.324           | 0.013892835 | 3.0091732 | up |
| CUST 322 PI426073487    | uc.324           | 0.013892835 | 3.0091732 | up |
| CUST 850 PI426073487    | uc.371           | 0.027196558 | 2.030118  | up |
| CUST 850 PI426073487    | uc.371           | 0.027196558 | 2.030118  | up |
| CUST 850 PI426073487    | uc.371           | 0.027196558 | 2.030118  | up |
| ASMM9PARTA005626        |                  | 0.001491764 | 3.9304707 | up |
| mouselincRNA0413+ P1    | mouselincRNA0413 | 0.003593903 | 2.5391424 | up |
| humanlincRNA1576+ P1    | humanlincRNA1576 | 0.031454343 | 2.2732453 | up |
| ASMM9PARTA007884        |                  | 0.025023691 | 3.7976923 | up |
| MM9LINCRNAEXON10053+ P1 | mouselincRNA1654 | 0.005884349 | 2.1847844 | up |
| ASMM9PARTA013524        | Gm16407          | 0.021851366 | 2.1022146 | up |
| ASMM9PARTA006409        |                  | 0.014835628 | 2.49838   | up |
| ASMM9PARTA047151        | MAIR-IIa         | 0.000873    | 3.2963796 | up |
| ASMM9PARTA005747        |                  | 0.000283    | 2.0381892 | up |
| ASMM9PARTA010654        | Gm12057          | 0.009653101 | 2.1286013 | up |
| MM9LINCRNAEXON11597- P1 | mouselincRNA0422 | 0.00028     | 3.4359727 | up |
| MM9LINCRNAEXON10991+ P1 |                  | 0.0000977   | 3.246831  | up |
| MM9LINCRNAEXON10788- P1 | mouselincRNA1158 | 0.003637178 | 3.1387908 | up |
| ASMM9PARTA002929        |                  | 0.007812527 | 4.445197  | up |
| ASMM9PARTA046040        | 4931406H21Rik    | 0.006116352 | 2.2583747 | up |

|                          |                  |             |           |    |
|--------------------------|------------------|-------------|-----------|----|
| ASMM9PARTA006147         |                  | 0.008449999 | 2.7044325 | up |
| ASMM9PARTA014539         | Gm16095          | 0.04013583  | 2.0622075 | up |
| ASMM9PARTA015438         | B430212C06Rik    | 0.023355633 | 4.033507  | up |
| mouselincRNA0935+ P1     | mouselincRNA0935 | 0.002627854 | 2.3365896 | up |
| mouselincRNA0953+ P1     | mouselincRNA0953 | 0.004046383 | 2.506643  | up |
| ASMM9PARTA050563         | AK039589         | 0.027110359 | 2.4989367 | up |
| ASMM9PARTA001301         |                  | 0.004140169 | 3.808549  | up |
| ASMM9PARTA016462         | Gm14635          | 0.020431722 | 2.5554345 | up |
| ASMM9PARTA014015         | Gm13793          | 0.001002149 | 3.132261  | up |
| MM9LINC RNAEXON11361- P1 | mouselincRNA0586 | 0.002789273 | 4.376738  | up |
| ASMM9PARTA017005         | Gm14340          | 0.008188108 | 2.333206  | up |
| ASMM9PARTA005615         |                  | 0.011714377 | 2.5922735 | up |
| ASMM9PARTA018378         | 4930486I03Rik    | 0.01697491  | 2.1486802 | up |
| ASMM9PARTA008221         |                  | 0.000494    | 2.7395587 | up |
| ASMM9PARTA002874         |                  | 0.000000781 | 19.095455 | up |
| ASMM9PARTA003592         |                  | 0.000000529 | 2.2310605 | up |
| ASMM9PARTA006865         |                  | 0.000325    | 4.007223  | up |
| CF585596 P1              | humanlincRNA0369 | 0.00074     | 2.4564066 | up |
| CF585596 P1              | humanlincRNA0369 | 0.00074     | 2.4564066 | up |
| CF585596 P1              | humanlincRNA0369 | 0.00074     | 2.4564066 | up |
| CF585596 P1              | humanlincRNA0369 | 0.00074     | 2.4564066 | up |
| CF585596 P1              | humanlincRNA0369 | 0.00074     | 2.4564066 | up |
| CF585596 P1              | humanlincRNA0369 | 0.00074     | 2.4564066 | up |
| MM9LINC RNAEXON11347- P1 | mouselincRNA0566 | 0.005428209 | 2.718914  | up |
| ASMM9PARTA003335         |                  | 0.000189    | 2.6276195 | up |
| ASMM9PARTA004660         |                  | 0.007580058 | 2.577663  | up |
| ASMM9PARTA005963         |                  | 0.00133358  | 6.5122476 | up |
| ASMM9PARTA005963         |                  | 0.00133358  | 6.5122476 | up |
| ASMM9PARTA005238         |                  | 0.000315    | 4.2467995 | up |
| ASMM9PARTA004795         |                  | 0.009538312 | 3.4787257 | up |
| ASMM9PARTA010220         | Gm14803          | 0.002420924 | 2.1448472 | up |
| ASMM9PARTA015594         | D430001F17Rik    | 0.0437562   | 2.0228877 | up |
| mouselincRNA0295+ P1     | mouselincRNA0295 | 0.041968614 | 5.0190034 | up |
| ASMM9PARTA001200         |                  | 0.017699424 | 2.5728662 | up |
| ASMM9PARTA049623         | Rzf              | 0.007529846 | 2.3152401 | up |
| ASMM9PARTA049623         | Rzf              | 0.007529846 | 2.3152401 | up |
| CF968634 P1              | humanlincRNA0134 | 0.002869968 | 3.297725  | up |
| ASMM9PARTA005100         |                  | 0.020054754 | 4.2711105 | up |
| ASMM9PARTA018143         | 7SK.319          | 0.042404737 | 2.4173079 | up |
| ASMM9PARTA006359         |                  | 0.00000007  | 16.216913 | up |
| AF282719 P1              | humanlincRNA0719 | 0.000772    | 7.0957775 | up |
| AF282719 P1              | humanlincRNA0719 | 0.000772    | 7.0957775 | up |
| AF282719 P1              | humanlincRNA0719 | 0.000772    | 7.0957775 | up |
| AF282719 P1              | humanlincRNA0719 | 0.000772    | 7.0957775 | up |
| AF282719 P1              | humanlincRNA0719 | 0.000772    | 7.0957775 | up |
| AF282719 P1              | humanlincRNA0719 | 0.000772    | 7.0957775 | up |
| AF282719 P1              | humanlincRNA0719 | 0.000772    | 7.0957775 | up |
| AF282719 P1              | humanlincRNA0719 | 0.000772    | 7.0957775 | up |
| ASMM9PARTA048810         | AK042686         | 0.001606488 | 4.311061  | up |
| ASMM9PARTA016490         | Gm15850          | 0.043831065 | 2.161194  | up |
| humanlincRNA2404- P1     | humanlincRNA2404 | 0.003765507 | 3.1941075 | up |
| ASMM9PARTA014438         | Pisd-ps2         | 0.0000295   | 3.9225237 | up |
| ASMM9PARTA016412         | Gm11337          | 0.011172816 | 3.2563884 | up |
| ASMM9PARTA003273         |                  | 0.000961    | 2.1440165 | up |
| ASMM9PARTA015815         | Gm15983          | 0.005759083 | 2.0799112 | up |
| humanlincRNA0170- P1     | humanlincRNA0170 | 0.03513029  | 3.0277035 | up |
| ASMM9PARTA006224         |                  | 0.004209496 | 2.4723294 | up |

|                         |                  |             |           |    |
|-------------------------|------------------|-------------|-----------|----|
| ASMM9PARTA006230        |                  | 0.003181617 | 2.6246455 | up |
| MM9LINCRNAEXON10995+ P1 |                  | 0.000219    | 2.2065775 | up |
| ASMM9PARTA001251        |                  | 0.032343972 | 2.0799944 | up |
| ASMM9PARTA013403        | Gm13108          | 0.002014019 | 3.0960884 | up |
| ASMM9PARTA011780        | Gm11305          | 0.00735963  | 3.0413704 | up |
| ASMM9PARTA015839        | Gm12299          | 0.025767269 | 2.2247999 | up |
| MM9LINCRNAEXON11718+ P1 | mouselincRNA0341 | 0.004537967 | 2.886666  | up |
| ASMM9PARTA003242        |                  | 0.0185691   | 2.3176277 | up |
| ASMM9PARTA006070        |                  | 0.00086     | 5.218045  | up |
| humanlincRNA1475- P1    | humanlincRNA1475 | 0.013494893 | 2.3496206 | up |
| ASMM9PARTA003922        |                  | 0.004797854 | 2.1118584 | up |
| ASMM9PARTA003922        |                  | 0.004797854 | 2.1118584 | up |
| ASMM9PARTA003922        |                  | 0.004797854 | 2.1118584 | up |
| ASMM9PARTA003922        |                  | 0.004797854 | 2.1118584 | up |
| ASMM9PARTA003546        |                  | 0.012164822 | 2.9510112 | up |
| ASMM9PARTA013870        | 7SK.46           | 0.00653718  | 3.0775836 | up |
| ASMM9PARTA000913        |                  | 0.01030242  | 2.28674   | up |
| mouselincRNA0303+ P1    | mouselincRNA0303 | 0.03366837  | 2.0809026 | up |
| ASMM9PARTA004587        |                  | 0.020102844 | 2.3598976 | up |
| MM9LINCRNAEXON10983- P1 | mouselincRNA0873 | 0.014677032 | 2.0352643 | up |
| ASMM9PARTA008175        |                  | 0.016396912 | 2.9928968 | up |
| MM9LINCRNAEXON10071- P1 | mouselincRNA1506 | 0.016131137 | 3.0533679 | up |
| MM9LINCRNAEXON11571+ P1 | mouselincRNA0391 | 0.003376605 | 2.921329  | up |
| ASMM9PARTA003751        |                  | 5.75E-08    | 9.076029  | up |
| ASMM9PARTA011562        | Gm15039          | 0.000397    | 3.1455555 | up |
| MM9LINCRNAEXON10841- P1 | mouselincRNA0984 | 0.030122142 | 2.888943  | up |
| ASMM9PARTA003610        |                  | 0.02455914  | 2.6326885 | up |
| mouselincRNA0327+ P1    | mouselincRNA0327 | 0.003797996 | 3.155185  | up |
| MM9LINCRNAEXON10848+ P1 | mouselincRNA0988 | 0.011432783 | 4.513205  | up |
| humanlincRNA1007- P1    | humanlincRNA1007 | 0.016611377 | 3.5594263 | up |
| CUST 124 PI426409190    | AC142215.1       | 0.0000134   | 2.7843447 | up |
| ASMM9PARTA004293        |                  | 0.004630854 | 2.7189882 | up |
| ASMM9PARTA004768        |                  | 0.001119941 | 2.5852275 | up |
| ASMM9PARTA049182        | AK196015         | 0.006319387 | 2.0723906 | up |
| ASMM9PARTA049182        | AK196015         | 0.006319387 | 2.0723906 | up |
| ASMM9PARTA045636        | Ngrn             | 0.0000968   | 2.0350733 | up |
| humanlincRNA1148- P1    | humanlincRNA1148 | 0.027692938 | 2.3294423 | up |
| MM9LINCRNAEXON11076- P1 |                  | 0.000333    | 2.5105052 | up |
| ASMM9PARTA008966        |                  | 0.022396708 | 2.323597  | up |
| humanlincRNA1751+ P1    | humanlincRNA1751 | 0.049138177 | 2.884519  | up |
| CJ270168 P1             | mouselincRNA0215 | 0.019876016 | 2.1509004 | up |
| ASMM9PARTA047903        | AK039376         | 0.008608301 | 2.372991  | up |
| ASMM9PARTA051767        | AK042998         | 0.000551    | 2.8822157 | up |
| ASMM9PARTA005065        |                  | 0.01467525  | 7.6537714 | up |
| MM9LINCRNAEXON12070+ P1 | mouselincRNA0095 | 0.020558814 | 3.234725  | up |
| ASMM9PARTA014527        | Gm15581          | 0.013598269 | 3.6646116 | up |
| ASMM9PARTA014527        | Gm15581          | 0.013598269 | 3.6646116 | up |
| CR518586 P1             | mouselincRNA0187 | 0.025893642 | 3.7312312 | up |
| ASMM9PARTA006133        |                  | 0.03523575  | 3.1345823 | up |
| ASMM9PARTA007358        |                  | 0.0000675   | 2.2560449 | up |
| ASMM9PARTA007105        |                  | 0.031383168 | 2.376892  | up |
| ASMM9PARTA011789        | Gm12856          | 0.000104    | 2.4299927 | up |
| ASMM9PARTA005998        |                  | 0.01808093  | 2.2901597 | up |
| ASMM9PARTA049586        | Il7              | 0.009178804 | 2.281167  | up |
| humanlincRNA2361+ P1    | humanlincRNA2361 | 0.009182313 | 2.2967227 | up |
| CUST 537 PI426073487    | uc.58            | 0.000262    | 2.276107  | up |
| ASMM9PARTA048789        | AK196959         | 0.025871867 | 2.508649  | up |

|                         |                  |             |           |    |
|-------------------------|------------------|-------------|-----------|----|
| ASMM9PARTA046723        | AK087691         | 0.031588674 | 3.0785332 | up |
| ASMM9PARTA004883        |                  | 0.0000819   | 5.482869  | up |
| ASMM9PARTA004883        |                  | 0.0000819   | 5.482869  | up |
| ASMM9PARTA049416        | Slco4a1          | 0.017494341 | 2.0650449 | up |
| ASMM9PARTA007774        |                  | 0.002636387 | 2.146709  | up |
| MM9LINCRNAEXON12111- P1 | mouselincRNA0122 | 0.000387    | 2.0534098 | up |
| ASMM9PARTA019467        | RP24-318H2.3     | 0.0195198   | 3.818625  | up |
| CN686219 P1             | mouselincRNA0474 | 0.000241    | 4.338695  | up |
| CN686219 P1             | mouselincRNA0474 | 0.000241    | 4.338695  | up |
| CN686219 P1             | mouselincRNA0474 | 0.000241    | 4.338695  | up |
| CN686219 P1             | mouselincRNA0474 | 0.000241    | 4.338695  | up |
| CN686219 P1             | mouselincRNA0474 | 0.000241    | 4.338695  | up |
| CN686219 P1             | mouselincRNA0474 | 0.000241    | 4.338695  | up |
| CN686219 P1             | mouselincRNA0474 | 0.000241    | 4.338695  | up |
| CN686219 P1             | mouselincRNA0474 | 0.000241    | 4.338695  | up |
| CN686219 P1             | mouselincRNA0474 | 0.000241    | 4.338695  | up |
| CN686219 P1             | mouselincRNA0474 | 0.000241    | 4.338695  | up |
| ASMM9PARTA000820        |                  | 0.007960998 | 2.4585204 | up |
| ASMM9PARTA000820        |                  | 0.007960998 | 2.4585204 | up |
| humanlincRNA0518+ P1    | humanlincRNA0518 | 0.001728922 | 2.3066185 | up |
| AK145365 P1             | mouselincRNA1288 | 0.022547744 | 2.299596  | up |
| MM9LINCRNAEXON11321+ P1 | mouselincRNA0524 | 0.020673875 | 2.8000972 | up |
| ASMM9PARTA050637        | smarp            | 0.000395    | 2.9558716 | up |
| ASMM9PARTA009217        |                  | 0.003658279 | 4.6805663 | up |
| ASMM9PARTA049997        | AK090251         | 0.000592    | 2.1281261 | up |
| ASMM9PARTA049997        | AK090251         | 0.000592    | 2.1281261 | up |
| ASMM9PARTA000801        |                  | 0.001110978 | 2.623008  | up |
| CUST_118_PI426073487    | uc.120           | 0.014781382 | 2.306064  | up |
| CUST_118_PI426073487    | uc.120           | 0.014781382 | 2.306064  | up |
| ASMM9PARTA007224        |                  | 0.030296622 | 2.900314  | up |
| BX636194 P1             | mouselincRNA1032 | 0.000592    | 3.4412906 | up |
| ASMM9PARTA045201        | Gm10565          | 0.036532503 | 2.4264839 | up |
| ASMM9PARTA050227        | BC028660         | 0.02773815  | 2.5893104 | up |
| ASMM9PARTA017822        | 7SK.135          | 0.019660747 | 3.0378206 | up |
| ASMM9PARTA009325        |                  | 0.000021    | 3.2174046 | up |
| ASMM9PARTA009325        |                  | 0.000021    | 3.2174046 | up |
| ASMM9PARTA009325        |                  | 0.000021    | 3.2174046 | up |
| MM9LINCRNAEXON12056- P1 | mouselincRNA0073 | 0.001231018 | 3.119503  | up |
| ASMM9PARTA013963        | 6030471H07Rik    | 0.004164994 | 2.2393048 | up |
| ASMM9PARTA014781        | Gm16201          | 0.008633323 | 2.3121636 | up |
| ASMM9PARTA002895        |                  | 0.000149    | 2.3540666 | up |
| MM9LINCRNAEXON11730- P1 |                  | 0.000000132 | 8.980893  | up |
| ASMM9PARTA000137        |                  | 0.000273    | 3.074779  | up |
| MM9LINCRNAEXON11978+ P1 | mouselincRNA0222 | 0.002160778 | 2.204473  | up |
| MM9LINCRNAEXON11855- P1 |                  | 0.006662581 | 2.4833117 | up |
| MM9LINCRNAEXON11855- P1 |                  | 0.006662581 | 2.4833117 | up |
| MM9LINCRNAEXON11855- P1 |                  | 0.006662581 | 2.4833117 | up |
| ASMM9PARTA017917        | Gm16143          | 0.000922    | 5.5009575 | up |
| MM9LINCRNAEXON10903- P1 |                  | 0.00000597  | 2.737371  | up |
| ASMM9PARTA012091        | Gm12262          | 0.004504351 | 2.108258  | up |
| ASMM9PARTA014147        | E130006D01Rik    | 0.043600935 | 2.0462427 | up |
| humanlincRNA0574+ P1    | humanlincRNA0574 | 0.008705057 | 2.7942004 | up |
| ASMM9PARTA004140        |                  | 0.027165925 | 2.977007  | up |
| ASMM9PARTA008094        |                  | 0.014263074 | 3.1741056 | up |
| ASMM9PARTA013476        | Cxcl11           | 0.04881224  | 2.052698  | up |
| ASMM9PARTA013476        | Cxcl11           | 0.04881224  | 2.052698  | up |
| mouselincRNA1231- P1    | mouselincRNA1231 | 0.006263476 | 2.3302102 | up |

|                         |                  |             |           |    |
|-------------------------|------------------|-------------|-----------|----|
| ASMM9PARTA004601        |                  | 0.001504389 | 2.2137654 | up |
| ASMM9PARTA009446        | Mageb16-ps2      | 0.03255596  | 2.0165014 | up |
| ASMM9PARTA009446        | Mageb16-ps2      | 0.03255596  | 2.0165014 | up |
| ASMM9PARTA015200        | 1700081H22Rik    | 0.0128969   | 3.2490816 | up |
| MM9LINCRNAEXON11387- P1 | mouselincRNA0595 | 0.006707311 | 2.5604918 | up |
| ASMM9PARTA015086        | 4930432B10Rik    | 0.011798902 | 2.2729568 | up |
| ASMM9PARTA015086        | 4930432B10Rik    | 0.011798902 | 2.2729568 | up |
| ASMM9PARTA017308        | Gm12472          | 0.018170025 | 2.4549687 | up |
| ASMM9PARTA045906        | Gm7550           | 0.000251    | 2.2035732 | up |
| ASMM9PARTA050898        | AK040659         | 0.014976711 | 2.0857913 | up |
| ASMM9PARTA051534        | AK010793         | 0.047703233 | 2.4074008 | up |
| ASMM9PARTA000900        |                  | 0.000169    | 2.0460937 | up |
| ASMM9PARTA003847        |                  | 0.029512828 | 2.126018  | up |
| ASMM9PARTA045746        | G530011O06Rik    | 4.52E-08    | 3.7382073 | up |
| ASMM9PARTA045746        | G530011O06Rik    | 4.52E-08    | 3.7382073 | up |
| CUST 600 PI426073487    | uc.121           | 0.01564907  | 3.245898  | up |
| ASMM9PARTA016400        | Gm12204          | 0.006816887 | 2.7718306 | up |
| ASMM9PARTA006996        |                  | 0.000961    | 2.5933619 | up |
| ASMM9PARTA000944        |                  | 0.01944736  | 2.3564873 | up |
| ASMM9PARTA046813        | AK041795         | 0.007389697 | 2.3447719 | up |
| ASMM9PARTA004073        |                  | 0.01059565  | 2.0597837 | up |
| ASMM9PARTA008655        |                  | 0.001801538 | 2.7565634 | up |
| ASMM9PARTA008655        |                  | 0.001801538 | 2.7565634 | up |
| ASMM9PARTA008655        |                  | 0.001801538 | 2.7565634 | up |
| ASMM9PARTA003440        |                  | 0.0000222   | 3.326313  | up |
| ASMM9PARTA046385        | AK137370         | 0.000331    | 2.1035595 | up |
| ASMM9PARTA014524        | Gm16144          | 0.0168259   | 2.635315  | up |
| ASMM9PARTA015108        | AV039307         | 0.000213    | 2.0705316 | up |
| ASMM9PARTA015108        | AV039307         | 0.000213    | 2.0705316 | up |
| ASMM9PARTA015108        | AV039307         | 0.000213    | 2.0705316 | up |
| ASMM9PARTA015108        | AV039307         | 0.000213    | 2.0705316 | up |
| ASMM9PARTA001481        |                  | 0.007227806 | 4.7364945 | up |
| ASMM9PARTA047595        | AK035977         | 0.0000051   | 3.3314865 | up |
| ASMM9PARTA046895        | slc43a2          | 0.020435391 | 2.0050123 | up |
| ASMM9PARTA046895        | slc43a2          | 0.020435391 | 2.0050123 | up |
| ASMM9PARTA046895        | slc43a2          | 0.020435391 | 2.0050123 | up |
| ASMM9PARTA005435        |                  | 0.000000256 | 18.015913 | up |
| ASMM9PARTA048214        | AK170928         | 0.005106441 | 2.304618  | up |
| ASMM9PARTA048214        | AK170928         | 0.005106441 | 2.304618  | up |
| ASMM9PARTA048214        | AK170928         | 0.005106441 | 2.304618  | up |
| ASMM9PARTA010117        | Olfr833-ps1      | 0.0430436   | 2.5003648 | up |
| ASMM9PARTA050677        | AK085609         | 0.03988026  | 2.3959594 | up |
| ASMM9PARTA000395        |                  | 0.045012746 | 2.5709462 | up |
| ASMM9PARTA000399        |                  | 0.000328    | 2.6425545 | up |
| ASMM9PARTA000595        |                  | 0.020333577 | 2.0376506 | up |
| ASMM9PARTA013771        | 2810408111Rik    | 0.012482183 | 3.0549285 | up |
| ASMM9PARTA014536        | Gm11532          | 0.010399843 | 2.4161506 | up |
| ASMM9PARTA018595        | Gm15898          | 0.022621483 | 2.0472808 | up |
| MM9LINCRNAEXON11454- P1 | mouselincRNA0481 | 0.013212452 | 3.1834896 | up |
| ASMM9PARTA005235        |                  | 0.001210142 | 3.3483496 | up |
| ASMM9PARTA005235        |                  | 0.001210142 | 3.3483496 | up |
| ASMM9PARTA005235        |                  | 0.001210142 | 3.3483496 | up |
| ASMM9PARTA015476        | Hoxa11as         | 0.0000104   | 3.8943572 | up |
| CK378914 P1             | humanlincRNA1553 | 0.034202967 | 2.6908047 | up |
| ASMM9PARTA001502        |                  | 0.003783918 | 2.0007417 | up |
| ASMM9PARTA001502        |                  | 0.003783918 | 2.0007417 | up |
| ASMM9PARTA004458        |                  | 0.004508045 | 2.5133686 | up |



|                      |                  |             |           |    |
|----------------------|------------------|-------------|-----------|----|
| mouselincRNA1171+ P1 | mouselincRNA1171 | 0.032411795 | 2.5514    | up |
| ASMM9PARTA012488     | Gm11283          | 0.020013498 | 2.6281354 | up |
| ASMM9PARTA049866     | AK052888         | 0.005904906 | 2.0168877 | up |
| mouselincRNA0238- P1 | mouselincRNA0238 | 0.000426    | 2.984266  | up |
| ASMM9PARTA047894     | myo 10           | 0.003380551 | 2.3656745 | up |
| BB791535 P1          | humanlincRNA2428 | 0.000016    | 2.3109844 | up |
| ASMM9PARTA002051     |                  | 0.00000194  | 8.409327  | up |
| ASMM9PARTA051152     | Lrrc36           | 0.008097591 | 2.061716  | up |
| ASMM9PARTA051152     | Lrrc36           | 0.008097591 | 2.061716  | up |
| ASMM9PARTA051152     | Lrrc36           | 0.008097591 | 2.061716  | up |
| ASMM9PARTA049329     | AK044780         | 0.010201347 | 5.548784  | up |
| ASMM9PARTA010668     | Gm11905          | 0.040006787 | 2.5514011 | up |
| AI503337 P1          | mouselincRNA0302 | 0.004814492 | 3.1701016 | up |
| ASMM9PARTA044984     | Dio3os           | 0.002766666 | 3.090687  | up |
| ASMM9PARTA011429     | Gm14109          | 0.0000683   | 2.9777064 | up |
| ASMM9PARTA047707     | AK036194         | 0.0000249   | 3.31411   | up |
| ASMM9PARTA001427     |                  | 0.043376524 | 2.8309004 | up |
| ASMM9PARTA001427     |                  | 0.043376524 | 2.8309004 | up |
| ASMM9PARTA007597     |                  | 0.000891    | 2.0801847 | up |
| ASMM9PARTA009159     |                  | 0.001721845 | 2.0417426 | up |
| ASMM9PARTA048531     | NR_003519        | 0.0000666   | 3.0680885 | up |
| ASMM9PARTA047171     | AK012841         | 0.0000459   | 2.8754818 | up |
| ASMM9PARTA047171     | AK012841         | 0.0000459   | 2.8754818 | up |
| ASMM9PARTA051314     | AK017891         | 0.003712478 | 2.5869553 | up |
| ASMM9PARTA006005     |                  | 0.006116074 | 4.829948  | up |
| ASMM9PARTA016541     | Zfp133-ps        | 0.009674044 | 3.043616  | up |
| ASMM9PARTA048168     | AK157795         | 0.000128    | 2.652638  | up |
| ASMM9PARTA048168     | AK157795         | 0.000128    | 2.652638  | up |
| ASMM9PARTA006553     |                  | 0.038864736 | 2.5163722 | up |
| ASMM9PARTA003897     |                  | 0.009810638 | 2.1432943 | up |
| ASMM9PARTA050128     | AK019745         | 0.00062     | 2.0429552 | up |
| ASMM9PARTA010177     | Gm6973           | 0.002415242 | 2.8041196 | up |
| ASMM9PARTA049540     | AK076817         | 0.012002505 | 2.6666303 | up |
| humanlincRNA2366+ P1 | humanlincRNA2366 | 0.019007077 | 3.577876  | up |
| ASMM9PARTA010395     | Gm13566          | 0.028192304 | 2.4371617 | up |
| ASMM9PARTA014507     | Gm15941          | 0.011355937 | 2.6680515 | up |
| ASMM9PARTA014507     | Gm15941          | 0.011355937 | 2.6680515 | up |
| ASMM9PARTA014507     | Gm15941          | 0.011355937 | 2.6680515 | up |
| ASMM9PARTA014507     | Gm15941          | 0.011355937 | 2.6680515 | up |
| ASMM9PARTA045163     | Asb7             | 0.03220917  | 2.2842948 | up |
| ASMM9PARTA045163     | Asb7             | 0.03220917  | 2.2842948 | up |
| ASMM9PARTA045163     | Asb7             | 0.03220917  | 2.2842948 | up |
| ASMM9PARTA000711     |                  | 0.007415217 | 2.1036763 | up |
| ASMM9PARTA011226     | Gm14996          | 0.000197    | 13.965036 | up |
| AA265991 P1          | mouselincRNA1273 | 0.000329    | 3.5148315 | up |
| ASMM9PARTA017541     | A230087F16Rik    | 0.000288    | 4.1284275 | up |
| ASMM9PARTA006006     |                  | 5.09E-09    | 6.061923  | up |
| ASMM9PARTA051308     | AK038653         | 0.000921    | 4.2577143 | up |
| ASMM9PARTA015795     | 3110053B16Rik    | 0.005779855 | 9.20947   | up |
| ASMM9PARTA045251     | 4930583K01Rik    | 0.038328867 | 2.0776012 | up |
| ASMM9PARTA051637     | Fxy              | 0.04784923  | 2.491814  | up |
| ASMM9PARTA051637     | Fxy              | 0.04784923  | 2.491814  | up |
| ASMM9PARTA007173     |                  | 0.005225923 | 2.351652  | up |
| ASMM9PARTA004652     |                  | 0.04397347  | 2.339422  | up |
| ASMM9PARTA019226     | Gm16759          | 0.012134996 | 2.3422337 | up |
| ASMM9PARTA016310     | Gm12868          | 0.001711269 | 2.8343163 | up |
| ASMM9PARTA049238     | AK029171         | 0.00629853  | 5.3820868 | up |

|                          |                   |             |           |    |
|--------------------------|-------------------|-------------|-----------|----|
| AA791803 P1              | mouse lincRNA0980 | 0.004229304 | 2.4797354 | up |
| ASMM9PARTA003122         |                   | 0.0000136   | 4.2286463 | up |
| human lincRNA0573- P1    | human lincRNA0573 | 0.00521501  | 3.4760077 | up |
| CK377992 P1              | human lincRNA1344 | 0.00982045  | 2.4746296 | up |
| ASMM9PARTA002446         |                   | 0.007966969 | 3.9831717 | up |
| ASMM9PARTA004214         |                   | 0.00000442  | 2.7079759 | up |
| ASMM9PARTA044945         | Pisd-ps2          | 0.000000698 | 2.59912   | up |
| CUST 919 PI426073487     | uc.440            | 0.00147135  | 2.01403   | up |
| ASMM9PARTA045585         | Gm839             | 0.000568    | 2.2649157 | up |
| ASMM9PARTA016669         | Gm16211           | 0.036198933 | 2.4129307 | up |
| ASMM9PARTA005122         |                   | 0.0000117   | 2.5832894 | up |
| ASMM9PARTA047644         | AK035875          | 0.0000127   | 2.6074126 | up |
| ASMM9PARTA018523         | Airn              | 0.0000714   | 8.554767  | up |
| MM9LINC RNAEXON10694- P1 | mouse lincRNA1113 | 0.001748241 | 2.7544942 | up |
| ASMM9PARTA015549         | A830036E02Rik     | 0.00854246  | 5.175746  | up |
| MM9LINC RNAEXON10299- P1 | mouse lincRNA1501 | 0.0017595   | 2.4022002 | up |
| ASMM9PARTA047559         | AK042724          | 0.000018    | 3.1664455 | up |
| ASMM9PARTA008566         |                   | 0.024145622 | 2.2763615 | up |
| ASMM9PARTA008566         |                   | 0.024145622 | 2.2763615 | up |
| ASMM9PARTA051664         | Trip4             | 0.001610819 | 3.1623545 | up |
| ASMM9PARTA051664         | Trip4             | 0.001610819 | 3.1623545 | up |
| ASMM9PARTA051664         | Trip4             | 0.001610819 | 3.1623545 | up |
| ASMM9PARTA003375         |                   | 0.000208    | 2.03154   | up |
| mouse lincRNA0963- P1    | mouse lincRNA0963 | 0.041240107 | 2.8679602 | up |
| mouse lincRNA0436+ P1    | mouse lincRNA0436 | 0.041452058 | 3.3339229 | up |
| ASMM9PARTA019298         | AC157278.1        | 0.005295564 | 2.7677095 | up |
| ASMM9PARTA049975         | AK043904          | 0.00000966  | 2.6992455 | up |
| ASMM9PARTA004654         |                   | 0.010756833 | 2.3001642 | up |
| human lincRNA1385- P1    | human lincRNA1385 | 0.0000278   | 2.7191672 | up |
| ASMM9PARTA044892         | E430016F16Rik     | 0.012964277 | 2.7999663 | up |
| CUST 522 PI426073487     | uc.43             | 0.04265385  | 2.3163753 | up |
| ASMM9PARTA051782         | AK142198          | 0.004491635 | 2.5334752 | up |
| ASMM9PARTA051782         | AK142198          | 0.004491635 | 2.5334752 | up |
| ASMM9PARTA051782         | AK142198          | 0.004491635 | 2.5334752 | up |
| ASMM9PARTA051782         | AK142198          | 0.004491635 | 2.5334752 | up |
| ASMM9PARTA051782         | AK142198          | 0.004491635 | 2.5334752 | up |
| ASMM9PARTA003277         |                   | 0.005563146 | 2.3854492 | up |
| ASMM9PARTA047146         | AK087290          | 0.02601443  | 2.4732277 | up |
| ASMM9PARTA047146         | AK087290          | 0.02601443  | 2.4732277 | up |
| ASMM9PARTA006102         |                   | 0.015191331 | 2.2511697 | up |
| ASMM9PARTA016340         | BC006965          | 0.0000523   | 4.867762  | up |
| ASMM9PARTA047100         | AK005722          | 0.036922194 | 2.3813727 | up |
| ASMM9PARTA047100         | AK005722          | 0.036922194 | 2.3813727 | up |
| ASMM9PARTA049247         | AK040741          | 0.009180733 | 3.4751656 | up |
| ASMM9PARTA001889         |                   | 0.0000573   | 3.1273277 | up |
| ASMM9PARTA005953         |                   | 0.016811585 | 3.20891   | up |
| ASMM9PARTA003457         |                   | 0.000000134 | 2.1274035 | up |
| ASMM9PARTA003457         |                   | 0.000000134 | 2.1274035 | up |
| ASMM9PARTA003457         |                   | 0.000000134 | 2.1274035 | up |
| ASMM9PARTA010228         | Gm10827           | 0.000221    | 3.3223596 | up |
| MM9LINC RNAEXON10474+ P1 | mouse lincRNA1297 | 0.017352384 | 2.950174  | up |
| ASMM9PARTA005229         |                   | 0.000051    | 9.968039  | up |
| ASMM9PARTA050840         | AK050360          | 0.000188    | 2.1969428 | up |
| ASMM9PARTA010591         | Gm12131           | 0.012252663 | 2.3931608 | up |
| ASMM9PARTA014625         | Gm16662           | 0.005211503 | 2.5672529 | up |
| ASMM9PARTA014625         | Gm16662           | 0.005211503 | 2.5672529 | up |
| ASMM9PARTA015228         | Gm12576           | 0.045517977 | 2.0414014 | up |

|                         |                  |             |           |    |
|-------------------------|------------------|-------------|-----------|----|
| DT905990 P1             | humanlincRNA0233 | 0.006708864 | 2.0679245 | up |
| CUST_178_PI426073487    | uc.180           | 0.047720756 | 2.1331503 | up |
| ASMM9PARTA016151        | Gm15704          | 0.00034     | 2.0066426 | up |
| MM9LINCRNAEXON10606+ P1 | mouselincRNA1220 | 0.010221294 | 2.1154242 | up |
| ASMM9PARTA017746        | Gm12406          | 0.015883213 | 2.1940188 | up |
| MM9LINCRNAEXON11100- P1 |                  | 0.0000266   | 2.758228  | up |
| ASMM9PARTA003989        |                  | 0.006342701 | 2.75745   | up |
| ASMM9PARTA050047        | Pon2             | 0.012031178 | 2.053553  | up |
| ASMM9PARTA002287        |                  | 0.026253045 | 2.8593476 | up |
| ASMM9PARTA050636        | AK036632         | 0.011405653 | 2.1171608 | up |
| ASMM9PARTA003909        |                  | 0.00798211  | 3.1412895 | up |
| MM9LINCRNAEXON10533- P1 | mouselincRNA1174 | 0.012461234 | 3.108678  | up |
| ASMM9PARTA048456        | AK156750         | 0.03064462  | 2.0129848 | up |
| ASMM9PARTA048456        | AK156750         | 0.03064462  | 2.0129848 | up |
| ASMM9PARTA014677        | A830036E02Rik    | 0.000435    | 45.121548 | up |
| ASMM9PARTA016435        | Gm16598          | 0.035210583 | 2.7732875 | up |
| ASMM9PARTA016435        | Gm16598          | 0.035210583 | 2.7732875 | up |
| ASMM9PARTA051330        | Ttc13            | 0.00000107  | 2.935716  | up |
| ASMM9PARTA046346        | AK009784         | 0.008528904 | 2.3359718 | up |
| ASMM9PARTA003355        |                  | 0.011357634 | 2.2749739 | up |
| ASMM9PARTA005787        |                  | 0.013401753 | 2.6387243 | up |
| ASMM9PARTA005787        |                  | 0.013401753 | 2.6387243 | up |
| ASMM9PARTA005787        |                  | 0.013401753 | 2.6387243 | up |
| ASMM9PARTA006188        |                  | 0.000499    | 2.6555064 | up |
| ASMM9PARTA006188        |                  | 0.000499    | 2.6555064 | up |
| ASMM9PARTA014359        | Gm12648          | 0.024236048 | 2.649923  | up |
| ASMM9PARTA007503        |                  | 0.047398217 | 5.4163795 | up |
| ASMM9PARTA013921        | Gm15449          | 0.012926074 | 2.7023711 | up |
| ASMM9PARTA048287        | AK132606         | 0.000000579 | 2.4504342 | up |
| ASMM9PARTA018983        | AL606528.1       | 0.00045     | 3.7947605 | up |
| MM9LINCRNAEXON10522+ P1 | mouselincRNA1351 | 0.01097882  | 2.6133952 | up |
| ASMM9PARTA049755        | AK006706         | 0.049701747 | 2.6098168 | up |
| ASMM9PARTA007292        |                  | 0.000364    | 2.618107  | up |
| ASMM9PARTA007292        |                  | 0.000364    | 2.618107  | up |
| ASMM9PARTA007292        |                  | 0.000364    | 2.618107  | up |
| MM9LINCRNAEXON11968+ P1 |                  | 0.014316526 | 2.162776  | up |
| ASMM9PARTA046016        | Olfr856-ps1      | 0.002731215 | 2.6084263 | up |
| CUST_153_PI426073487    | uc.155           | 0.023007892 | 2.1121387 | up |
| ASMM9PARTA004570        |                  | 0.027941186 | 2.5921009 | up |
| ASMM9PARTA009000        |                  | 0.000242    | 3.0044978 | up |
| ASMM9PARTA051692        | AK019053         | 0.000123    | 2.651416  | up |
| ASMM9PARTA051692        | AK019053         | 0.000123    | 2.651416  | up |
| ASMM9PARTA047197        | AK046721         | 0.000707    | 2.1079693 | up |
| ASMM9PARTA047197        | AK046721         | 0.000707    | 2.1079693 | up |
| humanlincRNA0891+ P1    | humanlincRNA0891 | 0.03254211  | 2.1048813 | up |
| MM9LINCRNAEXON11798- P1 | mouselincRNA0252 | 0.023145236 | 2.0043    | up |
| CF586746 P1             | humanlincRNA0707 | 0.002633335 | 3.4305167 | up |
| CF586746 P1             | humanlincRNA0707 | 0.002633335 | 3.4305167 | up |
| CF586746 P1             | humanlincRNA0707 | 0.002633335 | 3.4305167 | up |
| CF586746 P1             | humanlincRNA0707 | 0.002633335 | 3.4305167 | up |
| CF586746 P1             | humanlincRNA0707 | 0.002633335 | 3.4305167 | up |
| CF586746 P1             | humanlincRNA0707 | 0.002633335 | 3.4305167 | up |
| CF586746 P1             | humanlincRNA0707 | 0.002633335 | 3.4305167 | up |
| CF586746 P1             | humanlincRNA0707 | 0.002633335 | 3.4305167 | up |
| CF586746 P1             | humanlincRNA0707 | 0.002633335 | 3.4305167 | up |
| ASMM9PARTA046691        | AK158612         | 0.000779    | 11.221282 | up |

|                         |                  |             |           |    |
|-------------------------|------------------|-------------|-----------|----|
| mouselincRNA0078- P1    | mouselincRNA0078 | 0.036236666 | 2.1452622 | up |
| ASMM9PARTA013817        | Gm15247          | 0.0000614   | 3.0098472 | up |
| ASMM9PARTA013817        | Gm15247          | 0.0000614   | 3.0098472 | up |
| ASMM9PARTA048242        | AK139359         | 0.000411    | 2.1412673 | up |
| ASMM9PARTA008846        |                  | 0.002321065 | 2.3002503 | up |
| ASMM9PARTA015865        | 1700047F07Rik    | 0.002786112 | 3.2242582 | up |
| ASMM9PARTA010290        | Rps2-ps13        | 0.00000143  | 2.0094447 | up |
| ASMM9PARTA003855        |                  | 0.000803    | 2.6637871 | up |
| ASMM9PARTA012460        | Gm12876          | 0.003103023 | 2.1190248 | up |
| ASMM9PARTA051121        | Lrrc49           | 0.00000666  | 20.39547  | up |
| ASMM9PARTA051121        | Lrrc49           | 0.00000666  | 20.39547  | up |
| ASMM9PARTA051121        | Lrrc49           | 0.00000666  | 20.39547  | up |
| ASMM9PARTA002375        |                  | 0.000000269 | 28.71547  | up |
| ASMM9PARTA003040        |                  | 0.006775585 | 3.4083211 | up |
| ASMM9PARTA051093        | AK137397         | 0.033166505 | 2.1031444 | up |
| ASMM9PARTA018971        | AC165246.1       | 0.000334    | 4.7090154 | up |
| ASMM9PARTA048621        | Akd2             | 0.033046994 | 2.0939624 | up |
| ASMM9PARTA004055        |                  | 1.03E-08    | 57.48466  | up |
| ASMM9PARTA050230        | AK131834         | 0.0177835   | 3.267112  | up |
| ASMM9PARTA047992        | AK043393         | 0.0000131   | 3.4294982 | up |
| ASMM9PARTA048439        | BC023719         | 0.007264353 | 2.9192505 | up |
| humanlincRNA1152+ P1    | humanlincRNA1152 | 0.000165    | 2.4595704 | up |
| ASMM9PARTA004548        |                  | 0.000128    | 2.3919067 | up |
| ASMM9PARTA047783        | Ugcgl2           | 0.002353273 | 2.3200574 | up |
| ASMM9PARTA003032        |                  | 0.024736745 | 2.3304965 | up |
| ASMM9PARTA003032        |                  | 0.024736745 | 2.3304965 | up |
| ASMM9PARTA003032        |                  | 0.024736745 | 2.3304965 | up |
| ASMM9PARTA011540        | Pisd-ps1         | 0.0000007   | 2.758198  | up |
| ASMM9PARTA002372        |                  | 0.002291812 | 2.5871181 | up |
| ASMM9PARTA018126        | Gm11754          | 0.000905    | 3.2527559 | up |
| ASMM9PARTA044960        | BC006965         | 0.0000205   | 51.99762  | up |
| ASMM9PARTA007750        |                  | 0.000242    | 4.8765545 | up |
| MM9LINCRNAEXON10121- P1 | mouselincRNA1557 | 0.03973443  | 2.4058142 | up |
| ASMM9PARTA018650        | Gm15562          | 0.000798    | 2.2684283 | up |
| ASMM9PARTA018650        | Gm15562          | 0.000798    | 2.2684283 | up |
| ASMM9PARTA000537        |                  | 0.00000377  | 4.017122  | up |
| ASMM9PARTA050623        | Kox-1            | 0.00758429  | 2.2887216 | up |
| ASMM9PARTA049446        | AK031919         | 0.001327318 | 2.0094407 | up |
| ASMM9PARTA000684        |                  | 0.00000023  | 2.414727  | up |
| MM9LINCRNAEXON10518+ P1 | mouselincRNA1347 | 0.00000652  | 8.44547   | up |
| ASMM9PARTA045371        | 5033406O09Rik    | 0.006351451 | 4.404478  | up |
| ASMM9PARTA047885        | AK051464         | 0.00000465  | 3.3569086 | up |
| ASMM9PARTA046971        | AK138212         | 0.014335649 | 3.9975398 | up |
| ASMM9PARTA001331        |                  | 0.016304793 | 2.8768473 | up |
| ASMM9PARTA013646        | D230017M19Rik    | 0.004561038 | 3.5416203 | up |
| ASMM9PARTA010437        | Cd47             | 0.0000003   | 3.7367325 | up |
| ASMM9PARTA045591        | Gm11110          | 0.005692962 | 2.995289  | up |
| ASMM9PARTA004077        |                  | 0.0000266   | 2.2475781 | up |
| ASMM9PARTA002181        |                  | 0.00000226  | 3.4352078 | up |
| ASMM9PARTA019401        | 9430021M05Rik    | 0.0000468   | 2.5355873 | up |
| BC040767 P1             | humanlincRNA1200 | 0.000000165 | 61.509308 | up |
| ASMM9PARTA047452        | AK035979         | 0.010244649 | 2.57117   | up |
| ASMM9PARTA047452        | AK035979         | 0.010244649 | 2.57117   | up |
| ASMM9PARTA047452        | AK035979         | 0.010244649 | 2.57117   | up |
| ASMM9PARTA006908        |                  | 0.02270672  | 2.914636  | up |
| MM9LINCRNAEXON11245- P1 | mouselincRNA0732 | 0.003275278 | 2.5998127 | up |
| ASMM9PARTA002778        |                  | 0.000395    | 2.224805  | up |

|                         |                  |             |             |      |
|-------------------------|------------------|-------------|-------------|------|
| MM9LINCRNAEXON10103+ P1 | mouselincRNA1524 | 0.00215482  | 3.9604363   | up   |
| ASMM9PARTA004712        |                  | 0.012554678 | 2.7331784   | up   |
| ASMM9PARTA046229        | 4933407L21Rik    | 0.000337    | 2.173688    | up   |
| ASMM9PARTA014122        | Gm12336          | 0.004241258 | 2.0746315   | up   |
| BU563586 P1             | mouselincRNA1020 | 0.0000528   | 2.3510246   | up   |
| BU563586 P1             | mouselincRNA1020 | 0.0000528   | 2.3510246   | up   |
| BU563586 P1             | mouselincRNA1020 | 0.0000528   | 2.3510246   | up   |
| BU563586 P1             | mouselincRNA1020 | 0.0000528   | 2.3510246   | up   |
| BU563586 P1             | mouselincRNA1020 | 0.0000528   | 2.3510246   | up   |
| BU563586 P1             | mouselincRNA1020 | 0.0000528   | 2.3510246   | up   |
| BU563586 P1             | mouselincRNA1020 | 0.0000528   | 2.3510246   | up   |
| BU563586 P1             | mouselincRNA1020 | 0.0000528   | 2.3510246   | up   |
| BU563586 P1             | mouselincRNA1020 | 0.0000528   | 2.3510246   | up   |
| BU563586 P1             | mouselincRNA1020 | 0.0000528   | 2.3510246   | up   |
| BU563586 P1             | mouselincRNA1020 | 0.0000528   | 2.3510246   | up   |
| ASMM9PARTA015625        | Gm12531          | 0.044194296 | 2.0921938   | up   |
| ASMM9PARTA045275        | A930015D03Rik    | 0.00000261  | 2.331452    | up   |
| ASMM9PARTA045275        | A930015D03Rik    | 0.00000261  | 2.331452    | up   |
| ASMM9PARTA015864        | 4921508A21Rik    | 0.025709305 | 2.1973891   | up   |
| ASMM9PARTA002329        |                  | 0.000000369 | 4.9992266   | up   |
| CUST 271 PI426073487    | uc.273           | 0.026784262 | 2.2414715   | up   |
| ASMM9PARTA005505        |                  | 0.045906883 | 2.9198754   | up   |
| ASMM9PARTA001562        |                  | 0.010448659 | 3.90742     | up   |
| ASMM9PARTA014788        | B930095G15Rik    | 0.00000127  | 2.2076585   | up   |
| ASMM9PARTA050069        | BC038278         | 0.04067983  | 2.6454937   | up   |
| ASMM9PARTA002260        |                  | 0.001183438 | 3.406155    | up   |
| ASMM9PARTA002260        |                  | 0.001183438 | 3.406155    | up   |
| ASMM9PARTA004889        |                  | 0.00563523  | 2.3324635   | up   |
| ASMM9PARTA017528        | Gm13643          | 0.000000614 | 7.3649297   | up   |
| ASMM9PARTA016469        | Gm14097          | 0.002668656 | 2.026974    | up   |
| MM9LINCRNAEXON11123- P1 | mouselincRNA0738 | 0.013369232 | 2.1454418   | up   |
| ASMM9PARTA019220        | AC109232.1       | 0.001292565 | 2.7959533   | up   |
| ASMM9PARTA008820        |                  | 0.00011     | 5.821497    | up   |
| ASMM9PARTA048196        | AK040904         | 0.03488898  | 3.1997676   | up   |
| CF545861 P1             | humanlincRNA1302 | 0.000783    | 2.3439813   | up   |
| CF545861 P1             | humanlincRNA1302 | 0.000783    | 2.3439813   | up   |
| CF545861 P1             | humanlincRNA1302 | 0.000783    | 2.3439813   | up   |
| CF545861 P1             | humanlincRNA1302 | 0.000783    | 2.3439813   | up   |
| CF545861 P1             | humanlincRNA1302 | 0.000783    | 2.3439813   | up   |
| CF545861 P1             | humanlincRNA1302 | 0.000783    | 2.3439813   | up   |
| ASMM9PARTA001340        |                  | 0.029590495 | 2.4117913   | up   |
| MM9LINCRNAEXON11105+ P1 | mouselincRNA0821 | 0.000815    | 2.2092288   | up   |
| ASMM9PARTA008253        |                  | 0.0000981   | 2.2476554   | up   |
| ASMM9PARTA008253        |                  | 0.0000981   | 2.2476554   | up   |
| ASMM9PARTA010666        | Gm13890          | 0.025866123 | 2.594979    | up   |
| ASMM9PARTA014069        | A730017L22Rik    | 0.0000142   | 3.9973342   | up   |
| ASMM9PARTA004567        |                  | 0.000168    | 2.0477622   | up   |
| ASMM9PARTA011990        | Lamr1-ps1        | 0.00000206  | 41.54127    | up   |
| ASMM9PARTA015722        | 1700030C14Rik    | 0.010980662 | 2.0578198   | up   |
| ASMM9PARTA046496        | AK039487         | 0.001401456 | 0.362343036 | down |
| ASMM9PARTA008317        |                  | 0.003412898 | 0.473867218 | down |
| ASMM9PARTA001658        |                  | 0.001328203 | 0.480557508 | down |
| ASMM9PARTA045993        | Mogat1           | 0.007517785 | 0.404617429 | down |
| ASMM9PARTA009402        | D230002A01Rik    | 0.005323117 | 0.342491804 | down |
| ASMM9PARTA045726        | 4933436C20Rik    | 0.000151    | 0.413698244 | down |
| ASMM9PARTA045034        | Gm4759           | 0.027513668 | 0.462699567 | down |

|                         |                  |             |             |      |
|-------------------------|------------------|-------------|-------------|------|
| ASMM9PARTA051359        | AK015813         | 0.00000139  | 0.451870259 | down |
| ASMM9PARTA006958        |                  | 0.003484102 | 0.483782568 | down |
| ASMM9PARTA015180        | A530058N18Rik    | 0.000441    | 0.427147769 | down |
| ASMM9PARTA049723        | AK017111         | 0.000132    | 0.337344016 | down |
| ASMM9PARTA047120        | AK018924         | 0.030719675 | 0.416587029 | down |
| ASMM9PARTA047358        | AK050516         | 0.0000168   | 0.490624124 | down |
| ASMM9PARTA047358        | AK050516         | 0.0000168   | 0.490624124 | down |
| ASMM9PARTA002716        |                  | 0.034325533 | 0.376232944 | down |
| CUST_282_PI426073487    | uc.284           | 0.046482123 | 0.357398065 | down |
| ASMM9PARTA002902        |                  | 0.02499771  | 0.221094688 | down |
| ASMM9PARTA049912        | AK041061         | 0.0000277   | 0.483591358 | down |
| ASMM9PARTA016047        | G630018N14Rik    | 0.001970962 | 0.436000643 | down |
| ASMM9PARTA017494        | D230004N17Rik    | 0.033998575 | 0.472244803 | down |
| ASMM9PARTA006658        |                  | 0.04800194  | 0.261555523 | down |
| ASMM9PARTA046988        | AK079953         | 0.044223707 | 0.41940461  | down |
| ASMM9PARTA047030        | BC079904         | 0.03111449  | 0.48945295  | down |
| ASMM9PARTA046525        | BC072557         | 0.013454219 | 0.40896124  | down |
| ASMM9PARTA004452        |                  | 0.0000215   | 0.281461039 | down |
| ASMM9PARTA004221        |                  | 0.0000425   | 0.317601201 | down |
| ASMM9PARTA004432        |                  | 0.007780693 | 0.31441014  | down |
| ASMM9PARTA011381        | Mup-ps14         | 0.003041448 | 0.445417156 | down |
| ASMM9PARTA001776        |                  | 0.000233    | 0.274786785 | down |
| ASMM9PARTA003806        |                  | 0.001897902 | 0.478939177 | down |
| ASMM9PARTA010105        | Ear-ps2          | 0.0000234   | 0.440036569 | down |
| ASMM9PARTA049103        | AK042610         | 0.0000608   | 0.491740892 | down |
| ASMM9PARTA018383        | Gm16551          | 0.0000231   | 0.100222665 | down |
| ASMM9PARTA044944        | Neat1            | 0.00036     | 0.359952129 | down |
| ASMM9PARTA051179        | AK162599         | 0.0000151   | 0.07108291  | down |
| ASMM9PARTA051030        | AK034027         | 0.000782    | 0.415819504 | down |
| MM9LINCRNAEXON10396+ P1 | mouselincRNA1257 | 0.013060202 | 0.4850182   | down |
| ASMM9PARTA048125        | AK157947         | 0.017445752 | 0.338304092 | down |
| ASMM9PARTA048125        | AK157947         | 0.017445752 | 0.338304092 | down |
| ASMM9PARTA019355        | RP23-141L18.6    | 0.000253    | 0.315643215 | down |
| ASMM9PARTA051038        | BC065393         | 0.00266479  | 0.351991797 | down |
| ASMM9PARTA051038        | BC065393         | 0.00266479  | 0.351991797 | down |
| ASMM9PARTA051038        | BC065393         | 0.00266479  | 0.351991797 | down |
| ASMM9PARTA019050        | RP24-252L3.2     | 0.002593198 | 0.295423785 | down |
| ASMM9PARTA013843        | D230017M19Rik    | 0.0000497   | 0.386501198 | down |
| ASMM9PARTA049450        | AK039238         | 0.000000391 | 0.360403921 | down |
| ASMM9PARTA002484        |                  | 0.00000767  | 0.494338783 | down |
| ASMM9PARTA048535        | AK122507         | 0.000000285 | 0.04904395  | down |
| ASMM9PARTA010309        | Gm3371           | 0.003211698 | 0.496844787 | down |
| ASMM9PARTA004491        |                  | 0.000167    | 0.425024363 | down |
| ASMM9PARTA019195        | Mup-ps4          | 0.004270271 | 0.429479471 | down |
| ASMM9PARTA012200        | Gm12873          | 0.0231295   | 0.471783346 | down |
| ASMM9PARTA003714        |                  | 0.00000442  | 0.115731498 | down |
| ASMM9PARTA018880        | RP24-494O2.2     | 0.000731    | 0.247678288 | down |
| ASMM9PARTA006132        |                  | 0.000233    | 0.269760852 | down |
| ASMM9PARTA006132        |                  | 0.000233    | 0.269760852 | down |
| ASMM9PARTA006132        |                  | 0.000233    | 0.269760852 | down |
| ASMM9PARTA048083        | AK045744         | 0.013395895 | 0.298543867 | down |
| ASMM9PARTA014152        | Gm15856          | 0.010562672 | 0.447107276 | down |
| ASMM9PARTA047388        | AK012226         | 0.000295    | 0.397015649 | down |
| ASMM9PARTA019265        | RP23-48M16.7     | 0.005870366 | 0.242084971 | down |
| humanlincRNA0699+ P1    | humanlincRNA0699 | 0.007586535 | 0.494482172 | down |
| ASMM9PARTA006529        |                  | 0.0000152   | 0.267658072 | down |
| ASMM9PARTA006529        |                  | 0.0000152   | 0.267658072 | down |

|                          |                  |             |             |      |
|--------------------------|------------------|-------------|-------------|------|
| ASMM9PARTA002624         |                  | 0.000307    | 0.497419685 | down |
| ASMM9PARTA006528         |                  | 0.000798    | 0.264318531 | down |
| ASMM9PARTA018679         | RP23-353F16.2    | 0.006416766 | 0.379674793 | down |
| ASMM9PARTA000084         |                  | 0.021521907 | 0.383222371 | down |
| ASMM9PARTA002196         |                  | 0.0000657   | 0.493223114 | down |
| ASMM9PARTA002534         |                  | 0.001237931 | 0.358230175 | down |
| ASMM9PARTA017459         | Hoxb3os          | 0.00000939  | 0.095841633 | down |
| ASMM9PARTA017459         | Hoxb3os          | 0.00000939  | 0.095841633 | down |
| ASMM9PARTA017459         | Hoxb3os          | 0.00000939  | 0.095841633 | down |
| ASMM9PARTA013927         | Gm16002          | 0.000398    | 0.45618669  | down |
| ASMM9PARTA014954         | Gm11525          | 0.0000318   | 0.318872447 | down |
| ASMM9PARTA018150         | Gm16551          | 0.000253    | 0.342415529 | down |
| ASMM9PARTA047402         | AK131831         | 0.001354034 | 0.335270526 | down |
| BX520759 P1              | humanlincRNA2146 | 0.000921    | 0.311110774 | down |
| ASMM9PARTA012912         | Mup-ps22         | 0.00000307  | 0.4316216   | down |
| ASMM9PARTA005312         |                  | 0.0000167   | 0.242920826 | down |
| BE952410 P1              | mouselincRNA0913 | 0.010332281 | 0.397875077 | down |
| ASMM9PARTA050018         | AK054420         | 0.023911573 | 0.446465405 | down |
| ASMM9PARTA050018         | AK054420         | 0.023911573 | 0.446465405 | down |
| ASMM9PARTA012332         | Mup-ps21         | 0.000786    | 0.217376211 | down |
| ASMM9PARTA009152         |                  | 0.0000294   | 0.20673309  | down |
| ASMM9PARTA000460         |                  | 0.011800911 | 0.333811797 | down |
| ASMM9PARTA006997         |                  | 0.029949177 | 0.173930007 | down |
| ASMM9PARTA016113         | Gm15477          | 0.007053185 | 0.435548397 | down |
| ASMM9PARTA016113         | Gm15477          | 0.007053185 | 0.435548397 | down |
| ASMM9PARTA012180         | Mup-ps17         | 0.000000522 | 0.393828813 | down |
| ASMM9PARTA010361         | Gm14558          | 0.001708442 | 0.367512403 | down |
| ASMM9PARTA019160         | RP24-230H12.5    | 0.0000222   | 0.27810452  | down |
| MM9LINC RNAEXON10784- P1 |                  | 0.000104    | 0.366977204 | down |
| ASMM9PARTA015424         | Gm12688          | 0.000572    | 0.1103806   | down |
| ASMM9PARTA016956         | Mup-ps4          | 0.000949    | 0.45369842  | down |
| CUST 401 PI426073487     | uc.403           | 0.004230779 | 0.454935914 | down |
| ASMM9PARTA003754         |                  | 0.0000127   | 0.124849728 | down |
| ASMM9PARTA007000         |                  | 0.000000453 | 0.358056605 | down |
| ASMM9PARTA051795         | AK039412         | 0.02025379  | 0.480248484 | down |
| ASMM9PARTA003846         |                  | 0.00313168  | 0.262216647 | down |
| ASMM9PARTA003595         |                  | 0.005015307 | 0.398119839 | down |
| ASMM9PARTA003595         |                  | 0.005015307 | 0.398119839 | down |
| MM9LINC RNAEXON10811- P1 | mouselincRNA0961 | 0.024057826 | 0.308611495 | down |
| CUST 185 PI426409190     |                  | 0.0000112   | 0.313079559 | down |
| CUST 33 PI426409190      | AK029792         | 0.000177    | 0.434857631 | down |
| ASMM9PARTA049722         | LOC433791        | 7.61E-08    | 0.352886305 | down |
| ASMM9PARTA049722         | LOC433791        | 7.61E-08    | 0.352886305 | down |
| ASMM9PARTA049722         | LOC433791        | 7.61E-08    | 0.352886305 | down |
| ASMM9PARTA049722         | LOC433791        | 7.61E-08    | 0.352886305 | down |
| ASMM9PARTA049722         | LOC433791        | 7.61E-08    | 0.352886305 | down |
| ASMM9PARTA049722         | LOC433791        | 7.61E-08    | 0.352886305 | down |
| ASMM9PARTA049722         | LOC433791        | 7.61E-08    | 0.352886305 | down |
| MM9LINC RNAEXON11236+ P1 | mouselincRNA0720 | 0.000894    | 0.412037494 | down |
| ASMM9PARTA003819         |                  | 0.004296133 | 0.436223892 | down |
| ASMM9PARTA014404         | A530058N18Rik    | 0.0000332   | 0.462323116 | down |
| ASMM9PARTA016661         | Gm12829          | 0.001513297 | 0.44551461  | down |
| ASMM9PARTA045479         | Gm13629          | 0.000121    | 0.450152539 | down |
| ASMM9PARTA045479         | Gm13629          | 0.000121    | 0.450152539 | down |
| ASMM9PARTA010983         | Gm14356          | 0.008199115 | 0.459269901 | down |
| ASMM9PARTA051561         |                  | 0.001481297 | 0.200333848 | down |
| ASMM9PARTA016730         | Gm12027          | 0.0000392   | 0.417104714 | down |

|                         |                  |             |             |      |
|-------------------------|------------------|-------------|-------------|------|
| ASMM9PARTA050890        | Lrrk1            | 0.006577878 | 0.387302744 | down |
| ASMM9PARTA000231        |                  | 0.000884    | 0.391184195 | down |
| AK139568 P1             | humanlincRNA0333 | 0.00000128  | 0.194979724 | down |
| ASMM9PARTA005120        |                  | 0.000302    | 0.265824506 | down |
| CUST 54 PI426409190     | AK014857         | 0.0328176   | 0.467610973 | down |
| mouselincRNA0158- P1    | mouselincRNA0158 | 0.034005515 | 0.450857746 | down |
| ASMM9PARTA009527        |                  | 0.016835675 | 0.346499014 | down |
| ASMM9PARTA012440        | Mup-ps9          | 0.0000229   | 0.429112282 | down |
| ASMM9PARTA017008        | Gm15327          | 0.000214    | 0.345882923 | down |
| ASMM9PARTA012206        | Mup-ps18         | 0.000000136 | 0.415858913 | down |
| MM9LINCRNAEXON10524+ P1 |                  | 0.000027    | 0.454779997 | down |
| MM9LINCRNAEXON10212- P1 | mouselincRNA1479 | 0.0000175   | 0.257998402 | down |
| ASMM9PARTA002713        |                  | 0.025533654 | 0.450727912 | down |
| ASMM9PARTA012677        | Gm15842          | 0.002133467 | 0.359804407 | down |
| ASMM9PARTA006352        |                  | 0.03992566  | 0.486270351 | down |
| ASMM9PARTA007875        |                  | 0.03112585  | 0.227502282 | down |
| ASMM9PARTA015770        | Gm16956          | 0.002850667 | 0.405452969 | down |
| ASMM9PARTA051001        | AK087237         | 0.0332025   | 0.167575007 | down |
| ASMM9PARTA051001        | AK087237         | 0.0332025   | 0.167575007 | down |
| ASMM9PARTA012988        | Gm13508          | 0.001835251 | 0.245052795 | down |
| MM9LINCRNAEXON10967+ P1 |                  | 0.001195018 | 0.304812867 | down |
| ASMM9PARTA049878        | AK054344         | 0.000193    | 0.446810834 | down |
| ASMM9PARTA045575        | 5830416P10Rik    | 0.002439405 | 0.276173982 | down |
| ASMM9PARTA049286        | 1700012H17Rik    | 0.032262787 | 0.459180801 | down |
| ASMM9PARTA016460        | Scnm1            | 0.005798496 | 0.325017141 | down |
| ASMM9PARTA016460        | Scnm1            | 0.005798496 | 0.325017141 | down |
| ASMM9PARTA016460        | Scnm1            | 0.005798496 | 0.325017141 | down |
| ASMM9PARTA001071        |                  | 0.005560467 | 0.328727046 | down |
| ASMM9PARTA004783        |                  | 0.0000777   | 0.384043942 | down |
| ASMM9PARTA002304        |                  | 0.019730877 | 0.454541612 | down |
| MM9LINCRNAEXON10385- P1 | mouselincRNA1418 | 0.015078089 | 0.352879481 | down |
| ASMM9PARTA050576        | AK158295         | 0.008188009 | 0.471654952 | down |
| ASMM9PARTA002442        |                  | 0.018229224 | 0.447887465 | down |
| ASMM9PARTA014964        | Gm15859          | 0.017069848 | 0.457206897 | down |
| ASMM9PARTA000578        |                  | 0.013787686 | 0.456652407 | down |
| ASMM9PARTA000459        |                  | 0.00385981  | 0.427441158 | down |
| ASMM9PARTA050110        | Ccdc64           | 0.03261617  | 0.401969716 | down |
| ASMM9PARTA017850        | Gm12869          | 0.029190477 | 0.395660084 | down |
| ASMM9PARTA017850        | Gm12869          | 0.029190477 | 0.395660084 | down |
| ASMM9PARTA000679        |                  | 0.016818283 | 0.309249278 | down |
| humanlincRNA0095- P1    | humanlincRNA0095 | 0.026606258 | 0.472603751 | down |
| ASMM9PARTA007172        |                  | 0.015988328 | 0.484106939 | down |
| MM9LINCRNAEXON10850+ P1 | mouselincRNA1006 | 0.02514096  | 0.415607266 | down |
| ASMM9PARTA047980        | TCR-V[alpha]new  | 0.005961638 | 0.400660079 | down |
| ASMM9PARTA015793        | Gm13026          | 0.00867088  | 0.382351964 | down |
| ASMM9PARTA047035        | AK149240         | 0.000221    | 0.150775756 | down |
| ASMM9PARTA005692        |                  | 0.008178641 | 0.251093966 | down |
| ASMM9PARTA001994        |                  | 0.016821543 | 0.481259444 | down |
| ASMM9PARTA001994        |                  | 0.016821543 | 0.481259444 | down |
| ASMM9PARTA017930        | 7SK.169          | 0.01591268  | 0.148920822 | down |
| humanlincRNA1921- P1    | humanlincRNA1921 | 0.010268884 | 0.40555801  | down |
| CUST 930 PI426073487    | uc.451           | 0.000914    | 0.295643891 | down |
| ASMM9PARTA008021        |                  | 0.029019801 | 0.41680317  | down |
| ASMM9PARTA013177        | Gm14766          | 0.046619292 | 0.495165452 | down |
| ASMM9PARTA015024        | 1700084C06Rik    | 0.006603594 | 0.439972718 | down |
| ASMM9PARTA015024        | 1700084C06Rik    | 0.006603594 | 0.439972718 | down |
| ASMM9PARTA015024        | 1700084C06Rik    | 0.006603594 | 0.439972718 | down |



|                         |                  |             |             |      |
|-------------------------|------------------|-------------|-------------|------|
| ASMM9PARTA007013        |                  | 0.001776751 | 0.407864941 | down |
| ASMM9PARTA007013        |                  | 0.001776751 | 0.407864941 | down |
| ASMM9PARTA005010        |                  | 0.029155014 | 0.416336026 | down |
| ASMM9PARTA048499        | C21orf63         | 0.025012154 | 0.445244103 | down |
| ASMM9PARTA048499        | C21orf63         | 0.025012154 | 0.445244103 | down |
| ASMM9PARTA045641        | A530058N18Rik    | 0.000032    | 0.405261132 | down |
| ASMM9PARTA004720        |                  | 0.003370456 | 0.274396376 | down |
| ASMM9PARTA017349        | Gm15609          | 0.005875194 | 0.429054121 | down |
| MM9LINCRNAEXON10980- P1 | mouselincRNA0870 | 0.016191399 | 0.255913031 | down |
| ASMM9PARTA049844        | AK077204         | 0.017710544 | 0.455442158 | down |
| ASMM9PARTA007155        |                  | 0.014519695 | 0.360491046 | down |
| ASMM9PARTA046269        | TMEFF2           | 0.013982465 | 0.454104602 | down |
| ASMM9PARTA047666        | AK047145         | 0.0000729   | 0.423464794 | down |
| ASMM9PARTA002527        |                  | 0.000243    | 0.414173377 | down |
| ASMM9PARTA048438        | AK138161         | 0.00035     | 0.389151393 | down |
| ASMM9PARTA048438        | AK138161         | 0.00035     | 0.389151393 | down |
| ASMM9PARTA016983        | Gm13748          | 0.01364272  | 0.487372115 | down |
| MM9LINCRNAEXON11702+ P1 | mouselincRNA0335 | 0.037530392 | 0.494178674 | down |
| ASMM9PARTA014593        | Gm15169          | 0.003102606 | 0.447157558 | down |
| ASMM9PARTA050026        | AK018156         | 0.02313516  | 0.471849417 | down |
| ASMM9PARTA017010        | B630019A10Rik    | 0.000827    | 0.279547711 | down |
| ASMM9PARTA017112        | Spata511         | 0.005782161 | 0.494184731 | down |
| ASMM9PARTA008695        |                  | 0.023356978 | 0.220157827 | down |
| ASMM9PARTA002592        |                  | 0.007407138 | 0.450092991 | down |
| ASMM9PARTA049650        | AK078937         | 0.007783573 | 0.450551723 | down |
| MM9LINCRNAEXON11302- P1 | mouselincRNA0654 | 0.0000659   | 0.360722253 | down |
| ASMM9PARTA014143        | 4930443B20Rik    | 0.0000611   | 0.322571426 | down |
| humanlincRNA1523+ P1    | humanlincRNA1523 | 0.000158    | 0.468405049 | down |
| ASMM9PARTA017429        | Gm7076           | 0.00885977  | 0.442879211 | down |
| ASMM9PARTA047473        | AK139027         | 0.014451577 | 0.473453957 | down |
| ASMM9PARTA008116        |                  | 0.017804397 | 0.475114365 | down |
| ASMM9PARTA008116        |                  | 0.017804397 | 0.475114365 | down |
| ASMM9PARTA008116        |                  | 0.017804397 | 0.475114365 | down |
| ASMM9PARTA008067        |                  | 0.0000511   | 0.443449678 | down |
| CUST_643_PI426073487    | uc.164           | 0.003242937 | 0.254439861 | down |
| ASMM9PARTA015896        | BC039966         | 0.03143818  | 0.458021421 | down |
| MM9LINCRNAEXON10172+ P1 | mouselincRNA1430 | 0.005813236 | 0.381628073 | down |
| ASMM9PARTA018457        | Gm16556          | 0.030986499 | 0.327832339 | down |
| ASMM9PARTA008027        |                  | 0.011477151 | 0.446802449 | down |
| ASMM9PARTA008027        |                  | 0.011477151 | 0.446802449 | down |
| ASMM9PARTA017404        | 4930562A09Rik    | 0.003670974 | 0.399255787 | down |
| ASMM9PARTA014155        | 9330111N05Rik    | 0.004946098 | 0.384080626 | down |
| ASMM9PARTA011298        | Gm11913          | 0.018509272 | 0.424561205 | down |
| ASMM9PARTA008473        |                  | 0.00011     | 0.35159541  | down |
| ASMM9PARTA001231        |                  | 0.025542308 | 0.408158267 | down |
| ASMM9PARTA002911        |                  | 0.00430235  | 0.282395844 | down |
| ASMM9PARTA018610        | RP23-189E15.2    | 0.012221053 | 0.359472664 | down |
| ASMM9PARTA045380        | 4930412O13Rik    | 0.000053    | 0.104949558 | down |
| ASMM9PARTA050493        | AK031498         | 0.008709515 | 0.201979059 | down |
| ASMM9PARTA017116        | 1810010K12Rik    | 0.000724    | 0.491867705 | down |
| ASMM9PARTA018960        | RP24-376M8.1     | 0.001689828 | 0.409000799 | down |
| ASMM9PARTA001738        |                  | 0.00000277  | 0.033835069 | down |
| ASMM9PARTA004274        |                  | 0.014627503 | 0.493914724 | down |
| ASMM9PARTA014937        | Gm13838          | 0.0000299   | 0.420744735 | down |
| ASMM9PARTA000825        |                  | 0.000207    | 0.248911343 | down |
| ASMM9PARTA004842        |                  | 0.030639958 | 0.471529408 | down |
| MM9LINCRNAEXON10597- P1 | mouselincRNA1217 | 0.002173039 | 0.354654009 | down |

|                          |                  |             |             |      |
|--------------------------|------------------|-------------|-------------|------|
| BC025201 P1              | mouselincRNA0389 | 0.038952243 | 0.488663066 | down |
| ASMM9PARTA047397         | Slc38a6          | 0.000182    | 0.25378663  | down |
| ASMM9PARTA047397         | Slc38a6          | 0.000182    | 0.25378663  | down |
| ASMM9PARTA007736         |                  | 0.012373405 | 0.428039498 | down |
| ASMM9PARTA002040         |                  | 0.001095863 | 0.473795059 | down |
| ASMM9PARTA047077         | Aanat            | 0.008963102 | 0.454725753 | down |
| ASMM9PARTA006426         |                  | 0.031522863 | 0.278475126 | down |
| ASMM9PARTA045115         | 4933432109Rik    | 0.0000574   | 0.375129879 | down |
| MM9LINC RNAEXON10017- P1 | mouselincRNA1618 | 0.001855932 | 0.355313563 | down |
| ASMM9PARTA016487         | 1700001G11Rik    | 0.006681506 | 0.484329096 | down |
| CUST_432_PI426073487     | uc.434           | 0.007812248 | 0.452584529 | down |
| ASMM9PARTA046814         | AK007947         | 0.033838507 | 0.455882745 | down |
| ASMM9PARTA051103         | AK076954         | 0.00029     | 0.433068036 | down |
| ASMM9PARTA048873         | AK163667         | 0.001728083 | 0.495378858 | down |
| ASMM9PARTA002365         |                  | 0.015103385 | 0.479415435 | down |
| ASMM9PARTA010891         | Gm12391          | 0.00041     | 0.30400449  | down |
| ASMM9PARTA049459         | AK136882         | 0.000694    | 0.394886691 | down |
| ASMM9PARTA015587         | Gm14453          | 0.01403609  | 0.3894544   | down |
| ASMM9PARTA001615         |                  | 0.00000222  | 0.131958439 | down |
| ASMM9PARTA007098         |                  | 0.002253658 | 0.493181762 | down |
| ASMM9PARTA006877         |                  | 0.008796744 | 0.233671503 | down |
| ASMM9PARTA014572         | B230112J18Rik    | 0.005671887 | 0.381307469 | down |
| ASMM9PARTA001663         |                  | 0.000387    | 0.355752424 | down |
| ASMM9PARTA015758         | Gm11789          | 0.0000871   | 0.359052426 | down |
| ASMM9PARTA047518         | BC067033         | 0.021743435 | 0.478865739 | down |
| ASMM9PARTA015585         | Gm14344          | 0.014160373 | 0.43196339  | down |
| ASMM9PARTA008461         |                  | 0.002052042 | 0.31660004  | down |
| ASMM9PARTA051102         | AK015772         | 0.0000893   | 0.189227219 | down |
| ASMM9PARTA009401         | Kctd12           | 0.0000033   | 0.40786193  | down |
| ASMM9PARTA010758         | Gm11306          | 0.001740878 | 0.4361002   | down |
| ASMM9PARTA018741         | Gm10345          | 0.003713405 | 0.335949597 | down |
| ASMM9PARTA047428         | 1700049E17Rik    | 0.000425    | 0.494291428 | down |
| ASMM9PARTA018902         | AC160935.1       | 0.00000848  | 0.432794539 | down |
| ASMM9PARTA017269         | A530058N18Rik    | 0.000000119 | 0.38977093  | down |
| MM9LINC RNAEXON12072+ P1 | mouselincRNA0095 | 0.0000236   | 0.35816692  | down |
| ASMM9PARTA049498         | AK005639         | 0.00031     | 0.309770438 | down |
| ASMM9PARTA008936         |                  | 0.002604934 | 0.433416405 | down |
| ASMM9PARTA017032         | Gm16013          | 0.004035651 | 0.420528945 | down |
| ASMM9PARTA006929         |                  | 0.025868986 | 0.445257227 | down |
| ASMM9PARTA018865         | Gm6490           | 0.0006      | 0.201649346 | down |
| MM9LINC RNAEXON10148+ P1 | mouselincRNA1571 | 0.002281545 | 0.312583655 | down |
| ASMM9PARTA008669         |                  | 0.0000308   | 0.111388915 | down |
| ASMM9PARTA006629         |                  | 0.000525    | 0.470338635 | down |
| ASMM9PARTA006044         |                  | 0.041650496 | 0.491457728 | down |
| ASMM9PARTA046930         | AK018772         | 0.00000144  | 0.117129937 | down |
| ASMM9PARTA003873         |                  | 0.010305529 | 0.433508847 | down |
| ASMM9PARTA012580         | Gm4746           | 0.013480953 | 0.401072661 | down |
| ASMM9PARTA002100         |                  | 0.000658    | 0.330507025 | down |
| ASMM9PARTA006636         |                  | 0.000629    | 0.32266687  | down |
| ASMM9PARTA019819         | RP23-122J17.9    | 0.0000644   | 0.478930965 | down |
| MM9LINC RNAEXON10860- P1 | mouselincRNA1009 | 0.0000842   | 0.426624    | down |
| MM9LINC RNAEXON10133- P1 |                  | 0.0000232   | 0.096146829 | down |
| ASMM9PARTA007853         |                  | 0.0000063   | 0.436279236 | down |
| ASMM9PARTA047504         | Tcl1b2           | 0.047148082 | 0.38935564  | down |
| ASMM9PARTA002628         |                  | 0.0257711   | 0.399191733 | down |
| ASMM9PARTA002628         |                  | 0.0257711   | 0.399191733 | down |
| MM9LINC RNAEXON11176- P1 | mouselincRNA0672 | 0.036750093 | 0.310307137 | down |

|                         |                  |             |             |      |
|-------------------------|------------------|-------------|-------------|------|
| MM9LINCRNAEXON11362- P1 | mouselincRNA0586 | 0.035337172 | 0.452263211 | down |
| ASMM9PARTA002541        |                  | 0.035495844 | 0.45319746  | down |
| ASMM9PARTA002541        |                  | 0.035495844 | 0.45319746  | down |
| ASMM9PARTA003829        |                  | 0.000504    | 0.297347912 | down |
| ASMM9PARTA014590        | 4930506C21Rik    | 0.00000765  | 0.37774105  | down |
| ASMM9PARTA014590        | 4930506C21Rik    | 0.00000765  | 0.37774105  | down |
| ASMM9PARTA007125        |                  | 0.0000025   | 0.172173054 | down |
| ASMM9PARTA002413        |                  | 0.0000462   | 0.287728732 | down |
| ASMM9PARTA012241        | Gm14202          | 0.003053903 | 0.298227983 | down |
| MM9LINCRNAEXON10392+ P1 | mouselincRNA1254 | 0.010531249 | 0.466489494 | down |
| ASMM9PARTA000534        |                  | 0.000322    | 0.341782948 | down |
| ASMM9PARTA007187        |                  | 0.00000764  | 0.211143834 | down |
| ASMM9PARTA014537        | 1500016L03Rik    | 0.0000509   | 0.093057856 | down |
| ASMM9PARTA017215        | 1500002F19Rik    | 0.000206    | 0.293715645 | down |
| ASMM9PARTA008042        |                  | 0.04677815  | 0.391177737 | down |
| BC156060 P1             | mouselincRNA1038 | 0.0000828   | 0.465559058 | down |
| BC156060 P1             | mouselincRNA1038 | 0.0000828   | 0.465559058 | down |
| BC156060 P1             | mouselincRNA1038 | 0.0000828   | 0.465559058 | down |
| BC156060 P1             | mouselincRNA1038 | 0.0000828   | 0.465559058 | down |
| BC156060 P1             | mouselincRNA1038 | 0.0000828   | 0.465559058 | down |
| ASMM9PARTA000466        |                  | 0.009639558 | 0.185377851 | down |
| MM9LINCRNAEXON10875+ P1 |                  | 0.0000384   | 0.405267275 | down |
| ASMM9PARTA001596        |                  | 0.007536626 | 0.456133005 | down |
| ASMM9PARTA011383        | Gm12550          | 0.03376331  | 0.354617097 | down |
| ASMM9PARTA047054        | AK018624         | 0.030310832 | 0.46913907  | down |
| ASMM9PARTA009795        | Gm13775          | 0.0000119   | 0.361140945 | down |
| CUST 377 PI426073487    | uc.379           | 0.011175946 | 0.387693176 | down |
| ASMM9PARTA013594        | Gm11692          | 0.014341485 | 0.445321708 | down |
| ASMM9PARTA049969        | Gnpda2           | 0.004579535 | 0.401512691 | down |
| ASMM9PARTA049969        | Gnpda2           | 0.004579535 | 0.401512691 | down |
| ASMM9PARTA009277        |                  | 0.034954548 | 0.384677022 | down |
| ASMM9PARTA016031        | Gm15880          | 0.000544    | 0.491132794 | down |
| ASMM9PARTA004381        |                  | 0.013922407 | 0.463094516 | down |
| MM9LINCRNAEXON10016- P1 | mouselincRNA1618 | 0.018046526 | 0.425992295 | down |
| ASMM9PARTA050392        | M34473           | 0.00001     | 0.218723114 | down |
| ASMM9PARTA002466        |                  | 0.000258    | 0.284501327 | down |
| ASMM9PARTA017284        | Gm16762          | 0.001798692 | 0.406920166 | down |
| ASMM9PARTA002294        |                  | 0.000389    | 0.49939633  | down |
| ASMM9PARTA015093        | A530058N18Rik    | 0.0000419   | 0.419307043 | down |
| ASMM9PARTA004062        |                  | 0.000533    | 0.466510821 | down |
| ASMM9PARTA003147        |                  | 0.002513561 | 0.260221616 | down |
| ASMM9PARTA051221        | Phkb             | 0.000201    | 0.490687728 | down |
| ASMM9PARTA051221        | Phkb             | 0.000201    | 0.490687728 | down |
| MM9LINCRNAEXON10562+ P1 | mouselincRNA1192 | 0.025209295 | 0.42777074  | down |
| ASMM9PARTA048211        | AK080982         | 0.000168    | 0.387971397 | down |
| ASMM9PARTA019550        | RP23-78F6.7      | 0.020624833 | 0.247524998 | down |
| ASMM9PARTA047841        | AK086741         | 0.00000226  | 0.474249733 | down |
| ASMM9PARTA009136        |                  | 0.0417169   | 0.382143504 | down |
| CUST 76 PI426409190     | Mup-ps11         | 0.0000131   | 0.48233094  | down |
| CUST 76 PI426409190     | Mup-ps11         | 0.0000131   | 0.48233094  | down |
| CUST 483 PI426073487    | uc.2             | 0.000129    | 0.406068614 | down |
| CUST 483 PI426073487    | uc.2             | 0.000129    | 0.406068614 | down |
| ASMM9PARTA017021        | Gm13003          | 0.000758    | 0.429297678 | down |
| ASMM9PARTA005561        |                  | 0.000104    | 0.483016465 | down |
| ASMM9PARTA012454        | Gm13230          | 0.00000676  | 0.180299545 | down |
| ASMM9PARTA010530        | Gm13243          | 0.002986418 | 0.455463483 | down |
| ASMM9PARTA015845        | A530058N18Rik    | 0.000253    | 0.473238415 | down |

|                           |                  |             |             |      |
|---------------------------|------------------|-------------|-------------|------|
| ASMM9PARTA015845          | A530058N18Rik    | 0.000253    | 0.473238415 | down |
| ASMM9PARTA047453          | AK039140         | 0.000255    | 0.100872069 | down |
| ASMM9PARTA047453          | AK039140         | 0.000255    | 0.100872069 | down |
| ASMM9PARTA045267          | C230035I16Rik    | 0.006529616 | 0.456212496 | down |
| ASMM9PARTA007644          |                  | 0.01691688  | 0.327623285 | down |
| ASMM9PARTA007644          |                  | 0.01691688  | 0.327623285 | down |
| ASMM9PARTA003135          |                  | 0.01831891  | 0.287584555 | down |
| ASMM9PARTA003135          |                  | 0.01831891  | 0.287584555 | down |
| CUST_149_PI426073487      | uc.151           | 0.03303717  | 0.349328833 | down |
| ASMM9PARTA010272          | Gm11141          | 0.009274874 | 0.480606333 | down |
| ASMM9PARTA011946          | Mup-ps10         | 0.0000163   | 0.458632495 | down |
| ASMM9PARTA019132          | 9230115E21Rik    | 0.0000763   | 0.211702602 | down |
| ASMM9PARTA019018          | 5830444B04Rik    | 0.001817204 | 0.243884094 | down |
| ASMM9PARTA019018          | 5830444B04Rik    | 0.001817204 | 0.243884094 | down |
| ASMM9PARTA018548          | Airn             | 0.0000116   | 0.422970871 | down |
| ASMM9PARTA018548          | Airn             | 0.0000116   | 0.422970871 | down |
| CUST_161_PI426409190      |                  | 0.001147278 | 0.341333531 | down |
| ASMM9PARTA047612          | AK039634         | 1.55E-08    | 0.03905173  | down |
| ASMM9PARTA005211          |                  | 0.00000251  | 0.434686316 | down |
| MM9LINC RNA EXON10217- P1 | mouselincRNA1479 | 0.00046     | 0.231320039 | down |
| ASMM9PARTA003926          |                  | 0.00000339  | 0.025523537 | down |
| ASMM9PARTA019029          | RP23-136I9.5     | 0.004065114 | 0.266066364 | down |
| ASMM9PARTA018516          | Gm16290          | 0.000578    | 0.344764578 | down |
| ASMM9PARTA011888          | Gm13408          | 0.00000311  | 0.282601631 | down |
| ASMM9PARTA008301          |                  | 0.005426915 | 0.330173191 | down |
| ASMM9PARTA018654          | Ear-ps9          | 0.0000227   | 0.306114724 | down |
| ASMM9PARTA048567          | wtap             | 0.00000638  | 0.463729254 | down |
| ASMM9PARTA019083          | RP23-11E12.1     | 0.001       | 0.354476812 | down |
| ASMM9PARTA013585          | Gm13935          | 0.0000145   | 0.162647961 | down |
| ASMM9PARTA051041          | Scoc             | 0.000179    | 0.099155119 | down |
| ASMM9PARTA051041          | Scoc             | 0.000179    | 0.099155119 | down |
| mouselincRNA0963+ P1      | mouselincRNA0963 | 0.001133863 | 0.480745332 | down |
| ASMM9PARTA015038          | D230002A01Rik    | 0.000695    | 0.166032698 | down |
| ASMM9PARTA010625          | Gm15087          | 0.000302    | 0.224170498 | down |
| ASMM9PARTA019300          | RP24-246L19.3    | 0.001332479 | 0.292714906 | down |
| ASMM9PARTA007713          |                  | 0.001818279 | 0.378875077 | down |
| ASMM9PARTA047252          | AK149260         | 0.001525681 | 0.334376119 | down |
| ASMM9PARTA005609          |                  | 0.012965485 | 0.426893068 | down |
| ASMM9PARTA007817          |                  | 0.027461277 | 0.363885063 | down |
| ASMM9PARTA003086          |                  | 0.001963345 | 0.311779934 | down |
| ASMM9PARTA045668          | Hhatl            | 0.031815484 | 0.387863834 | down |
| AK029714 P1               | humanlincRNA0408 | 0.000000545 | 0.283854068 | down |
| MM9LINC RNA EXON10711- P1 | mouselincRNA1129 | 0.010001364 | 0.443039772 | down |
| mouselincRNA1407+ P1      | mouselincRNA1407 | 0.027479246 | 0.495960476 | down |
| ASMM9PARTA014686          | Gm14199          | 0.019699335 | 0.488429019 | down |
| ASMM9PARTA014686          | Gm14199          | 0.019699335 | 0.488429019 | down |
| ASMM9PARTA016225          | 1700030C12Rik    | 0.005584021 | 0.239739049 | down |
| ASMM9PARTA010260          | Mup-ps2          | 0.00031     | 0.46470075  | down |
| ASMM9PARTA047302          | mKIAA0044        | 0.00000249  | 0.389698553 | down |
| ASMM9PARTA009870          | Gm5535           | 0.003075737 | 0.389670854 | down |
| ASMM9PARTA010967          | Gm12392          | 0.00886978  | 0.226143434 | down |
| ASMM9PARTA048516          | AK020236         | 0.013940549 | 0.496808403 | down |
| ASMM9PARTA047208          | AK217959         | 0.000012    | 0.306205674 | down |
| ASMM9PARTA014504          | 8430419K02Rik    | 0.009455259 | 0.240161369 | down |
| ASMM9PARTA048743          | Ppp1rlc          | 0.003912812 | 0.286744238 | down |
| ASMM9PARTA048270          | AK213404         | 0.041083943 | 0.37046827  | down |
| ASMM9PARTA046268          | AK020188         | 0.0000639   | 0.389736933 | down |

|                         |                  |             |             |      |
|-------------------------|------------------|-------------|-------------|------|
| ASMM9PARTA004186        |                  | 0.00318922  | 0.410803137 | down |
| ASMM9PARTA018089        | RP23-11E12.5     | 0.000534    | 0.261600087 | down |
| ASMM9PARTA050720        | Usp29            | 0.0000665   | 0.458368246 | down |
| ASMM9PARTA050720        | Usp29            | 0.0000665   | 0.458368246 | down |
| MM9LINCRNAEXON10276- P1 | mouselincRNA1493 | 0.027028384 | 0.341533507 | down |
| ASMM9PARTA019681        | RP23-273L20.6    | 0.0000631   | 0.267635958 | down |
| MM9LINCRNAEXON10944- P1 | mouselincRNA0866 | 0.010310014 | 0.462037925 | down |
| ASMM9PARTA005745        |                  | 0.0000134   | 0.337694728 | down |
| ASMM9PARTA009455        |                  | 0.000000317 | 0.113642084 | down |
| ASMM9PARTA014791        | Gm15787          | 0.021934036 | 0.35541094  | down |
| ASMM9PARTA014791        | Gm15787          | 0.021934036 | 0.35541094  | down |
| ASMM9PARTA004550        |                  | 0.005766004 | 0.308531456 | down |
| ASMM9PARTA004550        |                  | 0.005766004 | 0.308531456 | down |
| ASMM9PARTA008988        |                  | 0.000558    | 0.440445008 | down |
| ASMM9PARTA016760        | Gm2694           | 0.00291606  | 0.26918967  | down |
| ASMM9PARTA003994        |                  | 0.001912721 | 0.377274778 | down |
| ASMM9PARTA047619        | Solt             | 0.011152606 | 0.329211994 | down |
| ASMM9PARTA047619        | Solt             | 0.011152606 | 0.329211994 | down |
| ASMM9PARTA047619        | Solt             | 0.011152606 | 0.329211994 | down |
| ASMM9PARTA019105        | RP24-84D8.2      | 0.000532    | 0.484175123 | down |
| ASMM9PARTA002348        |                  | 0.005730165 | 0.316064676 | down |
| ASMM9PARTA016697        | 4930412C18Rik    | 0.000326    | 0.455663342 | down |
| ASMM9PARTA016030        | Gm13601          | 0.018711317 | 0.456077315 | down |
| ASMM9PARTA016030        | Gm13601          | 0.018711317 | 0.456077315 | down |
| humanlincRNA2300+ P1    | humanlincRNA2300 | 0.002569187 | 0.411118401 | down |
| AV038163 P1             | humanlincRNA2267 | 0.00000584  | 0.486305633 | down |
| ASMM9PARTA018403        | AC159314.2       | 0.00052     | 0.495462726 | down |
| ASMM9PARTA019857        |                  | 0.015543167 | 0.314756539 | down |
| ASMM9PARTA019605        | BC006965         | 0.0000253   | 0.079893824 | down |
| ASMM9PARTA019379        | RP24-553G19.6    | 0.00000324  | 0.309163479 | down |
| ASMM9PARTA019477        | AC123998.1       | 0.004564321 | 0.37972064  | down |
| ASMM9PARTA050163        | BC064108         | 0.00000416  | 0.290485485 | down |
| ASMM9PARTA050163        | BC064108         | 0.00000416  | 0.290485485 | down |
| MM9LINCRNAEXON10539- P1 |                  | 0.00000643  | 0.053826644 | down |
| ASMM9PARTA016109        | Gm16682          | 0.007836073 | 0.40258341  | down |
| ASMM9PARTA016109        | Gm16682          | 0.007836073 | 0.40258341  | down |
| ASMM9PARTA018144        | Gm15051          | 0.00000946  | 0.295011184 | down |
| ASMM9PARTA006626        |                  | 0.0000136   | 0.089891567 | down |
| ASMM9PARTA019398        | RP24-376M8.4     | 0.00267173  | 0.211801809 | down |
| ASMM9PARTA050618        | AK007376         | 0.000739    | 0.281003621 | down |
| ASMM9PARTA009360        | Gm8935           | 0.0000844   | 0.310937442 | down |
| ASMM9PARTA003826        |                  | 0.000013    | 0.094834255 | down |
| ASMM9PARTA009936        | Mup-ps7          | 0.001257415 | 0.403149111 | down |
| ASMM9PARTA013773        | 4930506C21Rik    | 0.0000767   | 0.470337905 | down |
| ASMM9PARTA047001        | Dlx4             | 0.010552801 | 0.448361892 | down |
| ASMM9PARTA012215        | Mup-ps19         | 0.0000242   | 0.216140088 | down |
| ASMM9PARTA002462        |                  | 0.019172987 | 0.395698019 | down |
| ASMM9PARTA049404        | Myef2            | 0.0000145   | 0.388917243 | down |
| ASMM9PARTA049404        | Myef2            | 0.0000145   | 0.388917243 | down |
| ASMM9PARTA049404        | Myef2            | 0.0000145   | 0.388917243 | down |
| ASMM9PARTA049404        | Myef2            | 0.0000145   | 0.388917243 | down |
| ASMM9PARTA016845        | Gm16192          | 0.004391233 | 0.365837642 | down |
| ASMM9PARTA016845        | Gm16192          | 0.004391233 | 0.365837642 | down |
| ASMM9PARTA016845        | Gm16192          | 0.004391233 | 0.365837642 | down |
| ASMM9PARTA014276        | Gm12923          | 0.044867862 | 0.413795666 | down |
| ASMM9PARTA004298        |                  | 0.0000184   | 0.182439172 | down |
| MM9LINCRNAEXON10635- P1 | mouselincRNA1245 | 0.008426582 | 0.467752007 | down |

|                         |                  |             |             |      |
|-------------------------|------------------|-------------|-------------|------|
| ASMM9PARTA017214        | Gm15135          | 0.021248745 | 0.432028483 | down |
| CK382063 P1             | humanlincRNA0287 | 0.001561529 | 0.418112919 | down |
| ASMM9PARTA018977        | RP23-141L18.5    | 0.005367646 | 0.120579975 | down |
| ASMM9PARTA016186        | Gm14257          | 0.042050872 | 0.377661389 | down |
| ASMM9PARTA045199        | Rprl3            | 0.000555    | 0.333939801 | down |
| ASMM9PARTA002137        |                  | 0.0000451   | 0.318550732 | down |
| ASMM9PARTA050587        | AK038880         | 0.010033796 | 0.47581533  | down |
| ASMM9PARTA016224        | 4930412C18Rik    | 0.000000189 | 0.283312123 | down |
| ASMM9PARTA018791        | CT009711.1       | 0.012244543 | 0.306174558 | down |
| ASMM9PARTA001903        |                  | 0.015719334 | 0.471004049 | down |
| ASMM9PARTA019278        | Gm5226           | 0.000125    | 0.487968169 | down |
| BE949468 P1             | mouselincRNA1019 | 0.003282253 | 0.338326125 | down |
| ASMM9PARTA014333        | 1500016L03Rik    | 0.042245153 | 0.464325781 | down |
| ASMM9PARTA004128        |                  | 0.000156    | 0.438094988 | down |
| ASMM9PARTA018327        | Gm16577          | 0.023787472 | 0.484025536 | down |
| MM9LINCRNAEXON11076+ P1 |                  | 0.000015    | 0.478991894 | down |
| ASMM9PARTA051199        | 4432416J03Rik    | 0.004704305 | 0.436495683 | down |
| ASMM9PARTA016971        | Gm15535          | 0.0000122   | 0.393825447 | down |
| ASMM9PARTA015931        | Mup-ps2          | 0.000296    | 0.451854721 | down |
| ASMM9PARTA051808        |                  | 0.001205673 | 0.175082485 | down |
| ASMM9PARTA050787        | AK008222         | 0.04769696  | 0.492105399 | down |
| CUST_192_PI426073487    | uc.194           | 0.006887151 | 0.467806712 | down |
| ASMM9PARTA003853        |                  | 0.000181    | 0.489570772 | down |
| CD563094 P1             | mouselincRNA0148 | 0.000361    | 0.288000566 | down |
| ASMM9PARTA000191        |                  | 0.000271    | 0.308673891 | down |
| ASMM9PARTA045335        | H2-K2            | 0.000264    | 0.385186646 | down |
| ASMM9PARTA016836        | Hoxb3os          | 0.002511187 | 0.226352245 | down |
| ASMM9PARTA016836        | Hoxb3os          | 0.002511187 | 0.226352245 | down |
| ASMM9PARTA016836        | Hoxb3os          | 0.002511187 | 0.226352245 | down |
| ASMM9PARTA050456        | A530053G22Rik    | 0.000118    | 0.390731383 | down |
| ASMM9PARTA004371        |                  | 0.005219395 | 0.328429918 | down |
| ASMM9PARTA017530        | Gm16129          | 0.00563162  | 0.445302671 | down |
| ASMM9PARTA017530        | Gm16129          | 0.00563162  | 0.445302671 | down |
| ASMM9PARTA017530        | Gm16129          | 0.00563162  | 0.445302671 | down |
| CUST_692_PI426073487    | uc.213           | 0.002271777 | 0.272040867 | down |
| CUST_692_PI426073487    | uc.213           | 0.002271777 | 0.272040867 | down |
