# Supplementary material for: Microarray Profile of Long Noncoding RNA and Messenger RNA Expression in a Model of Alzheimer’s Disease
Source: MDPI journal article supplement (doi:10.3390/life10050064), 2020-05-14
Supplement: s1 [file s1]

# Supplementary

## Microarray Profile of Long Noncoding RNA and Messenger RNA Expression in a Model of Alzheimer's Disease

Linlin Wang <sup>†</sup>, Li Zeng <sup>†</sup>, Hailun Jiang, Zhuorong Li <sup>\*</sup> and Rui Liu <sup>\*</sup>

Institute of Medicinal Biotechnology, Chinese Academy of Medical Sciences and Peking Union Medical College, Beijing 100050, China; wanglinlin@wfmc.edu.cn (L.W.); zengsheng@imb.pumc.edu.cn (L.Z.); jianghailun@imb.pumc.edu.cn (H.J.)

<sup>\*</sup> Correspondence: lizhourong@imb.pumc.edu.cn (Z.L.); +86-10-8352017; .liurui@imb.pumc.edu.cn (R.L.); Tel.: +86-10-67087731

**Table S7.** Differently expressed mRNAs in the brain of 6-month-old APP/PS1 mice compared with age-matched WT mice.

| Probe Name       | Symbol        | p-Value     | Fold Change | Regulation |
|------------------|---------------|-------------|-------------|------------|
| ASMM9PARTA027293 | Spp1          | 0.0000451   | 2.1507535   | up         |
| ASMM9PARTA042739 | Ghsr          | 0.0000934   | 2.5166237   | up         |
| ASMM9PARTA025747 | Tshb          | 0.002031273 | 2.2207026   | up         |
| ASMM9PARTA031791 | Cfd           | 0.033389803 | 22.0273     | up         |
| ASMM9PARTA023112 | Gm514         | 0.04049753  | 2.0624256   | up         |
| ASMM9PARTA033120 | Cbln3         | 0.000000297 | 28.075712   | up         |
| ASMM9PARTA044292 | Zhx2          | 0.000745    | 5.022098    | up         |
| ASMM9PARTA039095 | Dbh           | 0.0000021   | 16.80503    | up         |
| ASMM9PARTA030304 | Myos          | 0.025340643 | 3.0412478   | up         |
| ASMM9PARTA030370 | Myl3          | 0.022885038 | 15.371072   | up         |
| ASMM9PARTA037203 | Arhgap24      | 0.001944784 | 2.2457936   | up         |
| ASMM9PARTA033464 | Nrip2         | 0.0000124   | 2.1364672   | up         |
| ASMM9PARTA026780 | Tirap         | 0.036988758 | 2.412029    | up         |
| ASMM9PARTA020996 | Gm5615        | 0.00276148  | 2.299788    | up         |
| ASMM9PARTA033070 | Mknk2         | 0.008370707 | 3.2609756   | up         |
| ASMM9PARTA026869 | Dnmt1         | 0.001004816 | 3.3003516   | up         |
| ASMM9PARTA044461 | Rsl24d1       | 0.0000209   | 3.105103    | up         |
| ASMM9PARTA023331 | Arhgap17      | 0.027770417 | 2.0804007   | up         |
| ASMM9PARTA019947 | Gjb6          | 0.000141    | 2.1275125   | up         |
| ASMM9PARTA021472 | Serpib6e      | 0.011722688 | 2.882823    | up         |
| ASMM9PARTA034385 | Smpx          | 0.016476726 | 9.117216    | up         |
| ASMM9PARTA042177 | Zfp934        | 0.000556    | 2.2483299   | up         |
| ASMM9PARTA022334 | Kbtbd10       | 0.018513989 | 3.2591946   | up         |
| ASMM9PARTA022668 | Gm5634        | 0.000856    | 3.7699485   | up         |
| ASMM9PARTA021305 | G630016D24Rik | 0.020363238 | 2.336865    | up         |
| ASMM9PARTA028762 | Pipox         | 0.016579866 | 2.05768     | up         |
| ASMM9PARTA032059 | Bag3          | 0.000000632 | 2.1400392   | up         |
| ASMM9PARTA034560 | Kctd20        | 0.04951716  | 3.5796947   | up         |
| ASMM9PARTA025718 | Cdr1          | 0.0000362   | 3.79277     | up         |
| ASMM9PARTA036648 | Pear1         | 0.032610297 | 2.8006957   | up         |

|                  |               |             |           |    |
|------------------|---------------|-------------|-----------|----|
| ASMM9PARTA027615 | Cdh15         | 0.010074805 | 3.2024999 | up |
| ASMM9PARTA025697 | 5-Mar         | 0.03398695  | 2.4036894 | up |
| ASMM9PARTA024198 | Lpp           | 0.001036903 | 2.7760649 | up |
| ASMM9PARTA034297 | Baiap211      | 0.000347    | 13.128269 | up |
| ASMM9PARTA027888 | Hbb-b1        | 2.17E-08    | 2.8186767 | up |
| ASMM9PARTA043897 | Vps39         | 0.00000818  | 6.309617  | up |
| ASMM9PARTA038774 | Kctd9         | 0.00019     | 2.0035682 | up |
| ASMM9PARTA030930 | Aplnr         | 0.0000104   | 3.750766  | up |
| ASMM9PARTA023161 | Vmn2r79       | 0.021861287 | 2.1963494 | up |
| ASMM9PARTA029828 | Cdh5          | 0.013344823 | 2.5924551 | up |
| ASMM9PARTA044055 | Abhd16b       | 0.01355558  | 2.592133  | up |
| ASMM9PARTA024307 | Hsd3b3        | 0.015399736 | 2.4931066 | up |
| ASMM9PARTA033640 | Stk32b        | 0.004813986 | 2.3867688 | up |
| ASMM9PARTA041340 | Phc3          | 0.008379956 | 3.2680974 | up |
| ASMM9PARTA032924 | Apbh          | 0.00733979  | 2.0741892 | up |
| ASMM9PARTA034865 | Ssr1          | 0.002536808 | 2.176073  | up |
| ASMM9PARTA026193 | Tmem11        | 0.011889421 | 2.635801  | up |
| ASMM9PARTA029560 | Cnn1          | 0.005160857 | 2.4631698 | up |
| ASMM9PARTA036950 | Eaf1          | 0.048665036 | 2.7194755 | up |
| ASMM9PARTA022309 | Tsc22d2       | 0.012616459 | 3.9405763 | up |
| ASMM9PARTA028059 | Gstm6         | 0.0000459   | 2.2506855 | up |
| ASMM9PARTA021642 | Hsf5          | 0.043553278 | 2.1462085 | up |
| ASMM9PARTA028818 | Th            | 0.00000893  | 2.2970579 | up |
| ASMM9PARTA022070 | Olfr455       | 0.006079886 | 2.072328  | up |
| ASMM9PARTA041981 | Phtf2         | 0.001884467 | 2.289164  | up |
| ASMM9PARTA020187 | Whrn          | 0.002399045 | 2.3698502 | up |
| ASMM9PARTA043696 | Zfp869        | 0.000164    | 2.5112703 | up |
| ASMM9PARTA024120 | Bcl2l15       | 0.00000181  | 6.9800644 | up |
| ASMM9PARTA044674 | Casc4         | 0.0000467   | 2.5319176 | up |
| ASMM9PARTA021097 | Trpm3         | 0.000691    | 5.5299506 | up |
| ASMM9PARTA025695 | R3hdm2        | 0.00489909  | 2.326392  | up |
| ASMM9PARTA023315 | Gatad2a       | 0.009272239 | 2.7316368 | up |
| ASMM9PARTA031792 | Ar            | 0.028068736 | 2.9195232 | up |
| ASMM9PARTA042087 | Fry           | 0.000238    | 2.2708285 | up |
| ASMM9PARTA039655 | Cald1         | 0.005097217 | 2.0567584 | up |
| ASMM9PARTA039607 | Oas1e         | 0.000819    | 3.174069  | up |
| ASMM9PARTA043179 | Fam163a       | 0.000347    | 3.2224464 | up |
| ASMM9PARTA041975 | Slc4a9        | 0.000625    | 2.2972817 | up |
| ASMM9PARTA019635 | Whamm         | 0.0000878   | 2.9223146 | up |
| ASMM9PARTA029086 | Ret           | 0.000284    | 2.0627956 | up |
| ASMM9PARTA028813 | Serpina3g     | 0.00000112  | 2.6244316 | up |
| ASMM9PARTA024171 | Homer3        | 0.000016    | 3.038775  | up |
| ASMM9PARTA034391 | 1700011A15Rik | 0.049442526 | 2.0497057 | up |
| ASMM9PARTA042058 | Mon1b         | 0.002280486 | 2.9871006 | up |
| ASMM9PARTA031518 | Spnb1         | 0.000582    | 5.295755  | up |
| ASMM9PARTA020586 | Defb46        | 0.010696249 | 2.0395687 | up |
| ASMM9PARTA025868 | Arhgap39      | 0.000537    | 2.4710615 | up |
| ASMM9PARTA040424 | Olfr197       | 0.0233421   | 2.075901  | up |
| ASMM9PARTA044228 | Ece1          | 0.004784548 | 2.6239338 | up |
| ASMM9PARTA030907 | Rgs16         | 0.0000114   | 4.361314  | up |
| ASMM9PARTA021052 | Tmem211       | 0.03917742  | 2.1583846 | up |
| ASMM9PARTA029461 | Vmn2r42       | 0.015054045 | 2.8441594 | up |
| ASMM9PARTA037016 | Tc2n          | 0.006119962 | 2.2615747 | up |
| ASMM9PARTA035876 | Pmvk          | 0.015881788 | 2.3479319 | up |
| ASMM9PARTA030121 | Eomes         | 0.0000614   | 3.354912  | up |
| ASMM9PARTA025469 | Amigo2        | 0.000802    | 2.2212565 | up |
| ASMM9PARTA028727 | Psen1         | 0.018458707 | 2.4210668 | up |

|                  |               |             |           |    |
|------------------|---------------|-------------|-----------|----|
| ASMM9PARTA043919 | A430033K04Rik | 0.00000451  | 3.1883342 | up |
| ASMM9PARTA027704 | Grid2         | 0.000857    | 2.8446321 | up |
| ASMM9PARTA024666 | Cntn1         | 0.000497    | 2.1110127 | up |
| ASMM9PARTA027419 | Agt           | 0.0000171   | 2.123765  | up |
| ASMM9PARTA038866 | 1110008J03Rik | 0.001368486 | 2.324984  | up |
| ASMM9PARTA028143 | Kera          | 0.021689761 | 2.130889  | up |
| ASMM9PARTA029077 | Vamp1         | 0.0000275   | 3.1666138 | up |
| ASMM9PARTA027054 | Spp1          | 0.00000948  | 2.4645803 | up |
| ASMM9PARTA019955 | Lrrc52        | 0.002044983 | 3.0441134 | up |
| ASMM9PARTA020417 | Gm5591        | 0.001059869 | 2.8320599 | up |
| ASMM9PARTA027610 | Capn5         | 0.016212257 | 2.0247874 | up |
| ASMM9PARTA030353 | Klk1b1        | 0.0000054   | 2.7851822 | up |
| ASMM9PARTA021767 | Rorb          | 0.015804261 | 2.4403055 | up |
| ASMM9PARTA028084 | Gabbr2        | 0.008975505 | 2.8294191 | up |
| ASMM9PARTA032069 | Gpc3          | 0.000525    | 5.630015  | up |
| ASMM9PARTA030219 | Hoxc13        | 0.006774094 | 2.6225698 | up |
| ASMM9PARTA019763 | Nlrp14        | 0.025239782 | 2.941392  | up |
| ASMM9PARTA022005 | Flnc          | 0.02564893  | 3.4128568 | up |
| ASMM9PARTA043948 | 6330503K22Rik | 0.009590808 | 2.168929  | up |
| ASMM9PARTA031864 | Ltbp2         | 0.005506281 | 2.084135  | up |
| ASMM9PARTA034100 | Pcbd1         | 0.000897    | 2.2127445 | up |
| ASMM9PARTA027062 | Dcun1d4       | 0.000164    | 2.0541759 | up |
| ASMM9PARTA027366 | Atoh1         | 0.025531106 | 2.0214107 | up |
| ASMM9PARTA033437 | Il21          | 0.017870067 | 3.065876  | up |
| ASMM9PARTA038785 | Krt25         | 0.00000787  | 5.745     | up |
| ASMM9PARTA033390 | Rgcd1         | 0.003801986 | 5.380088  | up |
| ASMM9PARTA025231 | Tnnt3         | 0.002261184 | 92.10396  | up |
| ASMM9PARTA029574 | Apob          | 0.00023     | 2.2258976 | up |
| ASMM9PARTA033704 | Sync          | 0.005422793 | 4.0052185 | up |
| ASMM9PARTA039024 | Atp12a        | 0.03470405  | 3.4817407 | up |
| ASMM9PARTA031529 | Zfp59         | 0.03831559  | 2.48568   | up |
| ASMM9PARTA029209 | Prss2         | 0.048823357 | 3.38558   | up |
| ASMM9PARTA040166 | Olfir122      | 0.001975795 | 3.254862  | up |
| ASMM9PARTA037334 | Mccc2         | 0.0000368   | 3.304477  | up |
| ASMM9PARTA040757 | Olfir1214     | 0.007098079 | 3.1042252 | up |
| ASMM9PARTA043067 | Ano5          | 0.031087117 | 2.5282829 | up |
| ASMM9PARTA029895 | Hspa1b        | 0.00000369  | 4.155569  | up |
| ASMM9PARTA028754 | P2ry1         | 0.0000979   | 2.2626753 | up |
| ASMM9PARTA029778 | Slc6a3        | 0.00000547  | 2.981036  | up |
| ASMM9PARTA038671 | D17H6S56E-3   | 0.001586099 | 2.706511  | up |
| ASMM9PARTA039871 | Ppp4r1        | 0.006232996 | 3.2765002 | up |
| ASMM9PARTA040991 | Clrn1         | 0.006462216 | 2.375496  | up |
| ASMM9PARTA041748 | Itih5         | 0.015554895 | 2.0738025 | up |
| ASMM9PARTA033142 | G6pc2         | 0.045349248 | 2.1340294 | up |
| ASMM9PARTA038384 | Vmn1r53       | 0.000728    | 2.467902  | up |
| ASMM9PARTA037367 | Trim42        | 0.022432802 | 2.4971278 | up |
| ASMM9PARTA024887 | Ccdc90b       | 0.00047     | 10.313978 | up |
| ASMM9PARTA029709 | Fut4          | 0.0000312   | 2.0945861 | up |
| ASMM9PARTA021373 | Akap2         | 0.0000253   | 2.9824905 | up |
| ASMM9PARTA025157 | Cttnbp2nl     | 0.027286498 | 2.3385003 | up |
| ASMM9PARTA043478 | Mapkapk3      | 0.026506413 | 2.2498312 | up |
| ASMM9PARTA043280 | Slc15a5       | 0.046162724 | 4.608725  | up |
| ASMM9PARTA033834 | 2010106G01Rik | 0.000591    | 4.5927052 | up |
| ASMM9PARTA043838 | Inpp5a        | 0.0000157   | 2.3635688 | up |
| ASMM9PARTA033715 | Foxb1         | 0.000159    | 2.247318  | up |
| ASMM9PARTA038903 | Lbr           | 0.033360366 | 2.5546308 | up |
| ASMM9PARTA021491 | Edem3         | 0.035057377 | 2.1087804 | up |

|                  |               |             |           |    |
|------------------|---------------|-------------|-----------|----|
| ASMM9PARTA041614 | Itpk1         | 0.000689    | 2.6587727 | up |
| ASMM9PARTA040339 | Olf196        | 0.000354    | 2.888675  | up |
| ASMM9PARTA032481 | Cbln1         | 6.21E-08    | 7.6642175 | up |
| ASMM9PARTA043545 | Zfp750        | 0.00000792  | 3.6266682 | up |
| ASMM9PARTA023587 | Schip1        | 0.007595373 | 2.278519  | up |
| ASMM9PARTA025288 | Rtdr1         | 0.001911789 | 2.317909  | up |
| ASMM9PARTA039817 | Ankrd40       | 0.0000125   | 3.1449397 | up |
| ASMM9PARTA023477 | Slc14a2       | 0.032083437 | 2.1979492 | up |
| ASMM9PARTA035767 | Zfp715        | 0.001757891 | 2.461495  | up |
| ASMM9PARTA043312 | Apol10b       | 0.01654708  | 3.3964062 | up |
| ASMM9PARTA042964 | Ep300         | 0.017471774 | 2.0880883 | up |
| ASMM9PARTA037995 | Clec2h        | 0.001158288 | 3.1110222 | up |
| ASMM9PARTA024254 | C530028O21Rik | 0.000695    | 2.6598995 | up |
| ASMM9PARTA023701 | Pcp2          | 0.00000446  | 24.346376 | up |
| ASMM9PARTA037527 | 1700110M21Rik | 0.0000836   | 2.4209843 | up |
| ASMM9PARTA042763 | Ankar         | 0.0000426   | 2.1058571 | up |
| ASMM9PARTA040966 | Cxcl17        | 0.008595878 | 3.92512   | up |
| ASMM9PARTA036365 | Zfp618        | 0.002117588 | 3.4052744 | up |
| ASMM9PARTA035190 | Art4          | 0.012851267 | 2.3664777 | up |
| ASMM9PARTA037939 | Prl2c2        | 0.001795423 | 3.205593  | up |
| ASMM9PARTA030102 | Heph          | 0.008351945 | 2.4032056 | up |
| ASMM9PARTA038954 | H1foo         | 1.58E-08    | 3.816673  | up |
| ASMM9PARTA041564 | Spata2        | 0.015378239 | 2.4230084 | up |
| ASMM9PARTA026523 | Gm4340        | 0.03074876  | 2.1404755 | up |
| ASMM9PARTA028498 | Il13ra2       | 0.000131    | 2.8751483 | up |
| ASMM9PARTA026945 | Dpp6          | 0.001361765 | 2.268861  | up |
| ASMM9PARTA024850 | A630055G03Rik | 0.0155094   | 2.0040278 | up |
| ASMM9PARTA037407 | 2310079F23Rik | 0.000922    | 2.5119534 | up |
| ASMM9PARTA041027 | Fcrl1         | 0.03209504  | 2.072643  | up |
| ASMM9PARTA028440 | Mybl1         | 0.015376825 | 2.0492637 | up |
| ASMM9PARTA030885 | Tagln         | 0.000107    | 2.238162  | up |
| ASMM9PARTA030400 | Mab21l1       | 0.0000142   | 4.5367174 | up |
| ASMM9PARTA025147 | 1110017F19Rik | 0.04037341  | 2.7562046 | up |
| ASMM9PARTA038572 | Tspan1        | 0.016547572 | 2.2429266 | up |
| ASMM9PARTA042451 | Gimap9        | 0.02050271  | 3.6060855 | up |
| ASMM9PARTA042579 | Tmem169       | 0.002666349 | 2.661957  | up |
| ASMM9PARTA021047 | Lrrc30        | 0.019311016 | 101.44545 | up |
| ASMM9PARTA037599 | Trdn          | 0.01988945  | 9.928261  | up |
| ASMM9PARTA030271 | Tsc22d3       | 0.000208    | 2.513357  | up |
| ASMM9PARTA043176 | Klhl23        | 0.036333885 | 2.1211534 | up |
| ASMM9PARTA024222 | Cntfr         | 0.000000248 | 20.435862 | up |
| ASMM9PARTA043586 | Ldlrad3       | 0.04709643  | 2.1698556 | up |
| ASMM9PARTA029305 | Emp1          | 0.026493885 | 2.3396127 | up |
| ASMM9PARTA021443 | Dach1         | 0.004493969 | 2.305273  | up |
| ASMM9PARTA028099 | Lrig1         | 0.0000134   | 2.8132274 | up |
| ASMM9PARTA021180 | Ceacam1       | 0.009496469 | 2.860777  | up |
| ASMM9PARTA027678 | Bmp5          | 0.026984278 | 2.2557604 | up |
| ASMM9PARTA034817 | 4921517D21Rik | 0.005037657 | 3.212635  | up |
| ASMM9PARTA033917 | Aox3          | 0.002923544 | 2.3182437 | up |
| ASMM9PARTA019807 | Pabpn1l       | 0.005487891 | 2.8395882 | up |
| ASMM9PARTA041849 | Fam70a        | 0.0000955   | 2.0372658 | up |
| ASMM9PARTA025907 | Phc3          | 0.04853418  | 3.0800793 | up |
| ASMM9PARTA023833 | Tspan32       | 0.029588483 | 2.9447546 | up |
| ASMM9PARTA043857 | Uts2d         | 0.000366    | 4.222785  | up |
| ASMM9PARTA028903 | Phox2a        | 0.000256    | 4.831777  | up |
| ASMM9PARTA042512 | 9230105E10Rik | 0.000692    | 2.464564  | up |
| ASMM9PARTA033690 | Ddr2          | 0.000069    | 2.4158735 | up |

|                      |               |             |           |    |
|----------------------|---------------|-------------|-----------|----|
| ASMM9PARTA030005     | Hipk1         | 0.00000171  | 2.8245034 | up |
| ASMM9PARTA022678     | Prrt4         | 0.006915411 | 2.8614578 | up |
| ASMM9PARTA022707     | Krtap9-5      | 0.00031     | 3.3291621 | up |
| ASMM9PARTA030244     | Gsr           | 0.0000322   | 6.854373  | up |
| ASMM9PARTA043610     | Nlr1          | 0.010251218 | 2.880651  | up |
| ASMM9PARTA031062     | Tnnt1         | 0.00000211  | 2.1378279 | up |
| ASMM9PARTA043415     | Prpf39        | 0.00000481  | 3.5499609 | up |
| ASMM9PARTA044030     | Igsf1         | 0.0000524   | 2.6186712 | up |
| ASMM9PARTA029529     | Dnase1        | 0.001909962 | 2.8052783 | up |
| ASMM9PARTA040116     | Olfr694       | 0.021078102 | 3.3556395 | up |
| ASMM9PARTA020086     | Whrn          | 0.023081334 | 2.1139889 | up |
| ASMM9PARTA024537     | Cd36          | 0.00013     | 2.2969499 | up |
| ASMM9PARTA022826     | Slc2a9        | 0.02643714  | 2.0945556 | up |
| ASMM9PARTA029985     | Fmn1          | 0.002995136 | 2.1423795 | up |
| CUST 241 PI426409190 | Ssty2         | 0.000606    | 2.6810532 | up |
| ASMM9PARTA042538     | Grik4         | 0.006821831 | 2.837808  | up |
| ASMM9PARTA032388     | Hbb-b2        | 0.0000234   | 2.3997326 | up |
| ASMM9PARTA031278     | Mab2112       | 0.029376728 | 3.4686258 | up |
| ASMM9PARTA020624     | Gal3st3       | 0.006092818 | 2.3928666 | up |
| ASMM9PARTA021175     | Ldb3          | 0.002290151 | 2.0798974 | up |
| ASMM9PARTA041188     | Dio3          | 0.002794048 | 2.2760143 | up |
| ASMM9PARTA029354     | Vipr2         | 0.013459918 | 3.065879  | up |
| ASMM9PARTA036776     | Tmc1          | 0.001881636 | 5.8655567 | up |
| ASMM9PARTA019864     | Olfr279       | 0.000771    | 2.7403243 | up |
| ASMM9PARTA022177     | Lhfpl3        | 0.0000118   | 2.015227  | up |
| ASMM9PARTA021401     | Sco1          | 0.028912717 | 2.1166487 | up |
| ASMM9PARTA020982     | Gm136         | 0.002576352 | 2.1638193 | up |
| ASMM9PARTA026309     | Rbms3         | 0.03979875  | 2.1052928 | up |
| ASMM9PARTA036032     | Pdgfd         | 0.02692101  | 3.0033252 | up |
| ASMM9PARTA041163     | Ccdc137       | 0.014191769 | 2.763659  | up |
| ASMM9PARTA041104     | Nat10         | 0.0401323   | 3.242169  | up |
| ASMM9PARTA038580     | Dst           | 0.045145154 | 2.7075315 | up |
| ASMM9PARTA021775     | Spna2         | 0.000147    | 2.0539868 | up |
| ASMM9PARTA031584     | Hoxd9         | 0.006060285 | 8.735599  | up |
| ASMM9PARTA030062     | Hspa1a        | 0.0000067   | 5.140137  | up |
| ASMM9PARTA021070     | Lipt1         | 0.024270058 | 2.5310833 | up |
| ASMM9PARTA041954     | Rln3          | 0.0000116   | 16.755537 | up |
| ASMM9PARTA033694     | Nup98         | 0.001093553 | 2.0166821 | up |
| ASMM9PARTA031964     | Tmod4         | 0.008487557 | 5.95723   | up |
| ASMM9PARTA034058     | Osbpl5        | 0.039886918 | 2.164772  | up |
| ASMM9PARTA033067     | Nova1         | 0.00000572  | 2.9075933 | up |
| ASMM9PARTA027370     | Calb2         | 0.000132    | 2.6458483 | up |
| ASMM9PARTA030586     | Per2          | 0.000386    | 2.510641  | up |
| ASMM9PARTA024773     | Myef2         | 0.00000144  | 3.3670971 | up |
| ASMM9PARTA039294     | Chrna3        | 0.00000842  | 2.247737  | up |
| ASMM9PARTA037392     | Flywch2       | 0.002874707 | 2.0012379 | up |
| ASMM9PARTA037145     | Gsc2          | 0.002820018 | 2.5668445 | up |
| ASMM9PARTA036517     | Vgll3         | 0.000586    | 3.5175169 | up |
| ASMM9PARTA031919     | Atp2a3        | 0.009953384 | 2.2323298 | up |
| ASMM9PARTA021470     | Ifi203        | 0.009155741 | 2.3724337 | up |
| ASMM9PARTA042749     | Actb12        | 0.017515803 | 2.4555907 | up |
| ASMM9PARTA031110     | Ywhaz         | 0.00000757  | 2.839082  | up |
| ASMM9PARTA026158     | Gtf2e2        | 0.00518237  | 3.1096683 | up |
| ASMM9PARTA020210     | 2700007P21Rik | 0.00015     | 13.020236 | up |
| ASMM9PARTA033314     | Jmy           | 0.007809873 | 2.534826  | up |
| ASMM9PARTA030680     | Neurod1       | 0.00000489  | 3.9375358 | up |
| ASMM9PARTA040122     | Cacnb4        | 0.000000403 | 2.448683  | up |

|                      |               |             |           |    |
|----------------------|---------------|-------------|-----------|----|
| ASMM9PARTA044544     | Mrgprb4       | 0.0000313   | 2.1738114 | up |
| ASMM9PARTA022634     | Dusp5         | 0.0000134   | 2.0263927 | up |
| ASMM9PARTA030432     | Lmx1b         | 0.007112836 | 2.2152882 | up |
| ASMM9PARTA022535     | Hba-a2        | 0.000392    | 2.4255915 | up |
| ASMM9PARTA021995     | Cep76         | 0.000218    | 2.3323243 | up |
| ASMM9PARTA041320     | Acsf2         | 0.0000591   | 2.1580765 | up |
| ASMM9PARTA036484     | Pi4k2b        | 0.007517041 | 2.150202  | up |
| ASMM9PARTA039203     | Cys1          | 0.000255    | 2.5070796 | up |
| ASMM9PARTA025140     | Rrp1b         | 0.004429032 | 2.774386  | up |
| ASMM9PARTA037729     | Apobec1       | 0.004225649 | 4.623898  | up |
| ASMM9PARTA037840     | Akap12        | 0.00000167  | 6.0745997 | up |
| CUST_243_PI426409190 | B020031M17Rik | 0.001004077 | 3.1337562 | up |
| ASMM9PARTA036824     | Arhgap8       | 0.004597947 | 2.661679  | up |
| ASMM9PARTA027106     | Me1           | 0.045341842 | 2.7356696 | up |
| ASMM9PARTA020953     | Ralgapa2      | 0.02107708  | 2.4623852 | up |
| ASMM9PARTA019915     | Zfyve26       | 0.030769322 | 6.8301525 | up |
| ASMM9PARTA019599     | Zfp619        | 0.013915096 | 2.6102865 | up |
| ASMM9PARTA029961     | Itih2         | 0.00774049  | 2.746205  | up |
| ASMM9PARTA035548     | 2610034M16Rik | 0.029662553 | 2.0447943 | up |
| ASMM9PARTA025965     | Galnt7        | 0.0000225   | 2.3616095 | up |
| ASMM9PARTA036961     | 1700001C19Rik | 0.000939    | 2.3691561 | up |
| ASMM9PARTA038935     | Ehd4          | 0.000582    | 4.431277  | up |
| ASMM9PARTA042571     | Ankrd34b      | 0.002932512 | 3.3556213 | up |
| ASMM9PARTA037836     | F13b          | 0.012693805 | 2.3770068 | up |
| ASMM9PARTA021982     | Gpr155        | 0.012926245 | 3.0703354 | up |
| ASMM9PARTA042755     | Cnpy1         | 0.00000572  | 9.815484  | up |
| ASMM9PARTA019700     | Amica1        | 0.01967706  | 3.7898314 | up |
| ASMM9PARTA031132     | Cd70          | 0.000000368 | 10.944201 | up |
| ASMM9PARTA044412     | Olfir645      | 0.000515    | 3.6101472 | up |
| ASMM9PARTA028102     | Kcnc3         | 0.000459    | 2.5806677 | up |
| ASMM9PARTA038930     | Vmn1r231      | 0.02228777  | 2.5191486 | up |
| ASMM9PARTA024346     | Zkscan3       | 0.03204355  | 3.2180145 | up |
| ASMM9PARTA026910     | Nkx3-2        | 0.006124512 | 2.7580554 | up |
| ASMM9PARTA027355     | Armxc4        | 0.03317694  | 2.5112898 | up |
| ASMM9PARTA024808     | Ttc15         | 1.66E-08    | 103.32905 | up |
| ASMM9PARTA022470     | Acin1         | 0.000398    | 2.6483488 | up |
| ASMM9PARTA019728     | A430105I19Rik | 0.0000744   | 2.4022124 | up |
| ASMM9PARTA036836     | Psd2          | 0.003252846 | 3.6852026 | up |
| ASMM9PARTA025234     | Psg18         | 0.007264738 | 2.285354  | up |
| ASMM9PARTA029776     | Dao           | 0.000003    | 6.381328  | up |
| ASMM9PARTA039500     | Hnrnpul1      | 0.002161555 | 2.5496287 | up |
| ASMM9PARTA040206     | Olfir1305     | 0.014845275 | 2.002494  | up |
| ASMM9PARTA020089     | Ppp1r13l      | 0.000722    | 2.2169778 | up |
| ASMM9PARTA021040     | Trpm3         | 0.001506105 | 15.397922 | up |
| ASMM9PARTA029136     | Svs5          | 0.001207155 | 3.3846748 | up |
| ASMM9PARTA020866     | Camk2d        | 0.0000433   | 2.1424425 | up |
| ASMM9PARTA042786     | Mrgprb2       | 0.001318275 | 3.5893843 | up |
| ASMM9PARTA039742     | Hmx2          | 0.011951079 | 2.2070355 | up |
| ASMM9PARTA044237     | Tspan15       | 0.0000517   | 3.375963  | up |
| ASMM9PARTA037515     | Kcnip4        | 0.000041    | 3.956419  | up |
| ASMM9PARTA040624     | Olfir907      | 0.00016     | 2.785742  | up |
| ASMM9PARTA037352     | Bicd2         | 0.000739    | 3.8382185 | up |
| ASMM9PARTA037850     | Kel           | 0.011615739 | 2.8589933 | up |
| ASMM9PARTA020376     | Gm5622        | 0.000459    | 2.199031  | up |
| ASMM9PARTA024400     | Pex19         | 0.046047475 | 2.1324735 | up |
| ASMM9PARTA037824     | 1700061G19Rik | 0.027703602 | 2.002491  | up |
| ASMM9PARTA042805     | Casc4         | 0.000722    | 2.038495  | up |

|                  |               |             |           |    |
|------------------|---------------|-------------|-----------|----|
| ASMM9PARTA031043 | Wdr1          | 0.00000441  | 2.1056302 | up |
| ASMM9PARTA032065 | Dlc1          | 0.0000614   | 3.96439   | up |
| ASMM9PARTA034262 | Srsf9         | 0.000102    | 2.5463078 | up |
| ASMM9PARTA030830 | Pcsk6         | 0.003532501 | 2.5390463 | up |
| ASMM9PARTA027033 | Kcnmb3        | 0.005199567 | 3.2952516 | up |
| ASMM9PARTA041105 | Mmrn2         | 0.000667    | 2.00408   | up |
| ASMM9PARTA039089 | Triobp        | 0.038257845 | 2.5824273 | up |
| ASMM9PARTA044550 | Rasgrp3       | 0.017140893 | 2.763976  | up |
| ASMM9PARTA031087 | Serpinf1      | 0.000174    | 2.261003  | up |
| ASMM9PARTA025317 | Mpp6          | 0.0000592   | 2.136795  | up |
| ASMM9PARTA026812 | Plch1         | 0.007054912 | 2.9347374 | up |
| ASMM9PARTA042748 | Zfp367        | 0.000671    | 2.114461  | up |
| ASMM9PARTA026781 | Asph          | 0.000643    | 2.092841  | up |
| ASMM9PARTA042834 | Sp8           | 0.049545813 | 2.1542397 | up |
| ASMM9PARTA034340 | Plekhf1       | 0.000006    | 3.0567439 | up |
| ASMM9PARTA025390 | Chn2          | 0.00000017  | 3.674339  | up |
| ASMM9PARTA020325 | Olfir288      | 0.000044    | 6.0403857 | up |
| ASMM9PARTA044568 | B4galnt3      | 0.00214913  | 2.0200653 | up |
| ASMM9PARTA039455 | Galnt7        | 0.00000339  | 5.971164  | up |
| ASMM9PARTA035313 | Fam134c       | 0.0000552   | 2.0044026 | up |
| ASMM9PARTA028888 | Slc1a6        | 0.00000017  | 4.558792  | up |
| ASMM9PARTA028251 | Mfap2         | 0.021973915 | 2.2584455 | up |
| ASMM9PARTA029080 | Zic1          | 2.75E-08    | 2.7256691 | up |
| ASMM9PARTA027863 | Cntn1         | 0.006698464 | 2.056628  | up |
| ASMM9PARTA032766 | Slc5a1        | 0.000437    | 2.324745  | up |
| ASMM9PARTA034780 | Lipf          | 0.010790499 | 2.430978  | up |
| ASMM9PARTA036813 | 1700011I03Rik | 0.027928095 | 2.7580304 | up |
| ASMM9PARTA020744 | Ccdc141       | 0.000279    | 6.163243  | up |
| ASMM9PARTA042368 | Ccdc88a       | 0.00791295  | 3.2940211 | up |
| ASMM9PARTA043130 | Exoc3l        | 0.00936924  | 3.0666118 | up |
| ASMM9PARTA039338 | Tmprss11d     | 0.001684542 | 4.3812766 | up |
| ASMM9PARTA029319 | Wnt3          | 0.000000967 | 2.064447  | up |
| ASMM9PARTA022542 | Atad2b        | 0.003796604 | 2.3051326 | up |
| ASMM9PARTA020793 | Dusp27        | 0.021160334 | 7.7792406 | up |
| ASMM9PARTA038129 | Klhl1         | 0.000171    | 2.3436751 | up |
| ASMM9PARTA033406 | Sap30         | 0.0000341   | 2.1461208 | up |
| ASMM9PARTA040840 | Olfir1047     | 0.010189298 | 3.2805078 | up |
| ASMM9PARTA025731 | Gm2799        | 0.03302557  | 6.0889807 | up |
| ASMM9PARTA028000 | Hba-a1        | 0.000000371 | 2.2257965 | up |
| ASMM9PARTA042773 | Itgb8         | 0.004099923 | 2.4200108 | up |
| ASMM9PARTA025232 | Tnnt3         | 0.00263361  | 42.93324  | up |
| ASMM9PARTA024050 | Sgca          | 0.046804093 | 7.6466875 | up |
| ASMM9PARTA021003 | Trpm3         | 0.000075    | 9.5873165 | up |
| ASMM9PARTA031395 | Slc27a2       | 0.00000132  | 2.1188936 | up |
| ASMM9PARTA043498 | Reps2         | 0.002706006 | 2.2106931 | up |
| ASMM9PARTA020326 | Olfir1386     | 0.028507153 | 2.1641836 | up |
| ASMM9PARTA031095 | Sox14         | 0.0000881   | 2.1730487 | up |
| ASMM9PARTA029686 | Pdia4         | 0.000297    | 2.0785758 | up |
| ASMM9PARTA043171 | Tmem69        | 0.004710449 | 3.7459686 | up |
| ASMM9PARTA028835 | Ppl           | 0.002112785 | 2.651658  | up |
| ASMM9PARTA027815 | Fbn1          | 0.0000735   | 2.8485188 | up |
| ASMM9PARTA035509 | 2310057N15Rik | 0.002414743 | 9.600296  | up |
| ASMM9PARTA037605 | Efcab6        | 0.029474366 | 2.6773224 | up |
| ASMM9PARTA040822 | Olfir902      | 0.003848341 | 3.0751271 | up |
| ASMM9PARTA024271 | Pax3          | 0.003083293 | 3.184304  | up |
| ASMM9PARTA042808 | Gchfr         | 0.0000145   | 2.2406266 | up |
| ASMM9PARTA032063 | Sufu          | 0.0074365   | 2.2831154 | up |

|                  |               |             |           |    |
|------------------|---------------|-------------|-----------|----|
| ASMM9PARTA034146 | Krtap3-3      | 0.026812445 | 2.436852  | up |
| ASMM9PARTA043245 | Gm14461       | 0.015765708 | 2.2798564 | up |
| ASMM9PARTA020936 | Calca         | 0.00000375  | 3.413624  | up |
| ASMM9PARTA034762 | Ceacam14      | 0.000837    | 2.1184804 | up |
| ASMM9PARTA020263 | Olf1211       | 0.023600569 | 3.029151  | up |
| ASMM9PARTA031037 | Try4          | 0.006781471 | 2.6001742 | up |
| ASMM9PARTA026515 | Shisa9        | 0.001662943 | 2.5787144 | up |
| ASMM9PARTA039612 | Duoxa1        | 0.005727533 | 2.359136  | up |
| ASMM9PARTA024549 | Smek1         | 0.004446384 | 2.2665513 | up |
| ASMM9PARTA020552 | Serinc4       | 0.03796334  | 2.4404204 | up |
| ASMM9PARTA020828 | Cpxcr1        | 0.00123529  | 2.0561805 | up |
| ASMM9PARTA041953 | Serpinb1c     | 0.002610939 | 3.0740879 | up |
| ASMM9PARTA025627 | Vmn1r168      | 0.0000289   | 2.517856  | up |
| ASMM9PARTA029772 | Cox7a1        | 0.003111761 | 2.4177475 | up |
| ASMM9PARTA024760 | Atp2a3        | 0.00000317  | 5.0496964 | up |
| ASMM9PARTA026365 | Arpc4         | 0.0000912   | 2.3872566 | up |
| ASMM9PARTA022337 | Arhgap36      | 0.004429061 | 2.2168605 | up |
| ASMM9PARTA029144 | Tnni2         | 0.012855267 | 57.733353 | up |
| ASMM9PARTA042277 | St18          | 0.000272    | 2.485741  | up |
| ASMM9PARTA025384 | Puf60         | 0.012556245 | 2.1604857 | up |
| ASMM9PARTA032045 | Uncx          | 0.00000569  | 4.4167857 | up |
| ASMM9PARTA028786 | Tnnc2         | 0.004108564 | 36.2881   | up |
| ASMM9PARTA043974 | Opn5          | 0.0000622   | 2.4719467 | up |
| ASMM9PARTA044790 | Vmn1r177      | 0.001943354 | 4.166602  | up |
| ASMM9PARTA041502 | Snx30         | 0.000566    | 2.3903387 | up |
| ASMM9PARTA034030 | Ankrd22       | 0.002593705 | 2.305333  | up |
| ASMM9PARTA023018 | Gabra6        | 0.00000044  | 68.853714 | up |
| ASMM9PARTA030388 | Igfbp5        | 0.046108607 | 2.194429  | up |
| ASMM9PARTA032853 | Fam48a        | 0.014244651 | 2.0026085 | up |
| ASMM9PARTA029959 | Irs4          | 0.013977591 | 2.212249  | up |
| ASMM9PARTA019811 | Mxi1          | 0.001022708 | 2.040559  | up |
| ASMM9PARTA031308 | Clec3b        | 0.001239764 | 2.016329  | up |
| ASMM9PARTA028683 | Pcp2          | 0.000198    | 3.2875087 | up |
| ASMM9PARTA031384 | Zfp9          | 0.01831999  | 2.0299964 | up |
| ASMM9PARTA041081 | Olf1711       | 0.031449612 | 2.7025623 | up |
| ASMM9PARTA042591 | Cyb5r2        | 0.004445947 | 2.1296048 | up |
| ASMM9PARTA026501 | Magi2         | 0.02515099  | 2.2347913 | up |
| ASMM9PARTA035464 | Srrm4         | 0.004873351 | 2.1525927 | up |
| ASMM9PARTA030405 | Myoc          | 1.78E-08    | 2.0539494 | up |
| ASMM9PARTA027336 | Cav3          | 0.034468632 | 11.514316 | up |
| ASMM9PARTA034118 | 1700020D05Rik | 0.000278    | 2.1767392 | up |
| ASMM9PARTA020564 | Yeats2        | 0.01473221  | 2.754269  | up |
| ASMM9PARTA030500 | Klk1b11       | 0.00000108  | 2.7794347 | up |
| ASMM9PARTA037389 | Calr3         | 0.00202343  | 2.6592324 | up |
| ASMM9PARTA022994 | Gm6251        | 0.000407    | 5.2407193 | up |
| ASMM9PARTA029402 | Apobec2       | 0.014304318 | 8.075904  | up |
| ASMM9PARTA038106 | Pth2          | 0.0000485   | 3.4290369 | up |
| ASMM9PARTA028920 | S100b         | 0.000000832 | 2.0906541 | up |
| ASMM9PARTA023496 | Stxbp5l       | 0.000317    | 2.0372517 | up |
| ASMM9PARTA037984 | E2f6          | 0.0000789   | 2.73142   | up |
| ASMM9PARTA020160 | Olf1229       | 0.019650666 | 2.1758113 | up |
| ASMM9PARTA041048 | Olf1390       | 0.022678364 | 2.140308  | up |
| ASMM9PARTA026421 | Plch1         | 0.020583244 | 2.1288514 | up |
| ASMM9PARTA027734 | Ebfl          | 0.004148378 | 3.2014337 | up |
| ASMM9PARTA021187 | Rrn3          | 0.000136    | 3.4482841 | up |
| ASMM9PARTA044488 | Ostn          | 0.000935    | 5.9937854 | up |
| ASMM9PARTA039435 | Mrgprf        | 0.000179    | 3.5290005 | up |



|                      |               |             |           |    |
|----------------------|---------------|-------------|-----------|----|
| ASMM9PARTA032757     | Cxcl11        | 0.018971197 | 3.7834735 | up |
| ASMM9PARTA024516     | Sgk1          | 0.00000765  | 2.107928  | up |
| ASMM9PARTA030282     | Hp1bp3        | 0.000578    | 3.1041622 | up |
| ASMM9PARTA033144     | Accn5         | 0.000304    | 4.12643   | up |
| ASMM9PARTA027834     | Csf2rb2       | 0.04952057  | 2.3011076 | up |
| ASMM9PARTA026178     | Rbms3         | 0.000576    | 2.7565129 | up |
| ASMM9PARTA020962     | Akap2         | 0.00000683  | 2.7353158 | up |
| CUST 307 PI426409190 | Amy2a5        | 0.0000228   | 2.060406  | up |
| ASMM9PARTA030450     | Gsbs          | 0.00000044  | 5.4431267 | up |
| ASMM9PARTA041214     | Adam1b        | 0.008788805 | 2.3065994 | up |
| ASMM9PARTA022749     | Pnmal2        | 0.014129776 | 2.0180314 | up |
| ASMM9PARTA025585     | Slc38a1       | 0.001739261 | 2.4397264 | up |
| ASMM9PARTA031638     | Uts2          | 0.000124    | 8.977784  | up |
| ASMM9PARTA022137     | Mtap7d2       | 0.00000829  | 2.4873993 | up |
| ASMM9PARTA030350     | Foxa2         | 0.0000796   | 3.0492747 | up |
| ASMM9PARTA023933     | Opn4          | 0.000193    | 2.4023864 | up |
| ASMM9PARTA026822     | Elavl2        | 0.000835    | 2.171586  | up |
| ASMM9PARTA023233     | Skor2         | 0.000503    | 5.272236  | up |
| ASMM9PARTA033226     | Sdf2l1        | 0.000000119 | 2.9944234 | up |
| ASMM9PARTA027981     | Evx1          | 6.88E-08    | 3.2314925 | up |
| ASMM9PARTA022335     | Cep152        | 0.041447245 | 2.2245932 | up |
| ASMM9PARTA028696     | Resp18        | 0.000000906 | 2.283674  | up |
| ASMM9PARTA035707     | 4921528I01Rik | 0.023241224 | 2.213509  | up |
| ASMM9PARTA024658     | Birc7         | 0.0000156   | 2.0662322 | up |
| ASMM9PARTA027331     | Btg1          | 0.03314706  | 2.0956974 | up |
| ASMM9PARTA027827     | Cd38          | 0.001392794 | 2.2292066 | up |
| ASMM9PARTA024004     | Dedd          | 0.010933708 | 2.241811  | up |
| ASMM9PARTA026887     | Pdlim5        | 0.004873829 | 2.0783958 | up |
| ASMM9PARTA029430     | Akap2         | 0.0000198   | 2.804051  | up |
| ASMM9PARTA038153     | Myoz3         | 0.003786849 | 12.108096 | up |
| ASMM9PARTA033675     | Dact1         | 0.03994828  | 2.0742466 | up |
| ASMM9PARTA027750     | Cbr2          | 0.000192    | 2.0349858 | up |
| ASMM9PARTA024571     | Pdelc         | 0.005904309 | 2.1231558 | up |
| ASMM9PARTA031052     | Sncg          | 0.00000623  | 2.9424489 | up |
| ASMM9PARTA041481     | Zswim4        | 0.000244    | 2.398425  | up |
| ASMM9PARTA031863     | Hspb1         | 0.00000259  | 2.7280755 | up |
| ASMM9PARTA044533     | Zfp933        | 0.00000182  | 6.0847216 | up |
| ASMM9PARTA031244     | Tcea3         | 0.03166103  | 2.7796075 | up |
| ASMM9PARTA030984     | Slc4a1        | 0.000308    | 2.2548468 | up |
| ASMM9PARTA029751     | Alox5         | 0.000573    | 3.5853097 | up |
| ASMM9PARTA034897     | Ttc23         | 0.035309765 | 2.9228115 | up |
| ASMM9PARTA027912     | Dcn           | 0.004250892 | 4.1296043 | up |
| ASMM9PARTA033313     | Abhd1         | 0.000226    | 2.9045417 | up |
| ASMM9PARTA029678     | Ahrr          | 0.033838246 | 2.2988186 | up |
| ASMM9PARTA042372     | 6430573F11Rik | 0.0000429   | 2.9362195 | up |
| ASMM9PARTA028062     | Hsd17b2       | 0.000178    | 2.4844553 | up |
| ASMM9PARTA021755     | Ret           | 0.004257571 | 2.1840377 | up |
| ASMM9PARTA037719     | Armex1        | 0.000058    | 2.0988758 | up |
| ASMM9PARTA019859     | Zfp456        | 0.006440431 | 2.3468914 | up |
| ASMM9PARTA027681     | Ckm           | 0.041310553 | 63.597164 | up |
| ASMM9PARTA031831     | Pvalb         | 0.00000581  | 2.5284045 | up |
| ASMM9PARTA022286     | Agmat         | 0.0000157   | 2.365273  | up |
| ASMM9PARTA033219     | Fign          | 0.000223    | 2.0633774 | up |
| ASMM9PARTA035573     | Fitm1         | 0.020627724 | 15.344873 | up |
| ASMM9PARTA038028     | Pdxdc1        | 0.00000421  | 2.9084237 | up |
| ASMM9PARTA032586     | Hebp2         | 0.003912168 | 2.2569003 | up |
| ASMM9PARTA030995     | Sdc4          | 0.0000285   | 2.1772516 | up |

|                  |               |             |           |    |
|------------------|---------------|-------------|-----------|----|
| ASMM9PARTA039169 | Onecut3       | 0.000958    | 2.4656615 | up |
| ASMM9PARTA026574 | Gm6588        | 0.00493508  | 2.4860842 | up |
| ASMM9PARTA033369 | Trp53inp1     | 0.025053442 | 2.1810691 | up |
| ASMM9PARTA038488 | Dpf3          | 0.00015     | 2.3491356 | up |
| ASMM9PARTA027810 | Eps8          | 0.000509    | 2.0840042 | up |
| ASMM9PARTA032827 | Pigp          | 0.002434658 | 2.1606565 | up |
| ASMM9PARTA022770 | 4933407P14Rik | 0.001538146 | 2.010531  | up |
| ASMM9PARTA042594 | Hnrnp1        | 0.00000534  | 3.3814728 | up |
| ASMM9PARTA033117 | Dpt           | 0.015191129 | 2.2584329 | up |
| ASMM9PARTA030942 | Prnp          | 0.00000509  | 2.3321254 | up |
| ASMM9PARTA043858 | Nhlh2         | 0.001418031 | 7.3683906 | up |
| ASMM9PARTA042037 | Aqp6          | 0.0000084   | 6.8246646 | up |
| ASMM9PARTA026534 | Cuedc1        | 0.00000967  | 2.1203527 | up |
| ASMM9PARTA033259 | Tlx1          | 0.0000148   | 2.7205691 | up |
| ASMM9PARTA025291 | Prph          | 0.00017     | 2.9519014 | up |
| ASMM9PARTA023927 | B3gnt5        | 0.03585292  | 2.1002202 | up |
| ASMM9PARTA032039 | Mylpf         | 0.019202126 | 19.031195 | up |
| ASMM9PARTA025067 | Tnnt3         | 0.024728868 | 20.21389  | up |
| ASMM9PARTA029843 | En2           | 0.000000626 | 4.271328  | up |
| ASMM9PARTA020689 | C1ql4         | 0.00000964  | 3.728463  | up |
| ASMM9PARTA020162 | Olf287        | 0.0000117   | 4.7746563 | up |
| ASMM9PARTA021792 | Unc13c        | 0.000214    | 2.8390257 | up |
| ASMM9PARTA027745 | Gabra6        | 0.000163    | 71.481064 | up |
| ASMM9PARTA038750 | 1110032A04Rik | 0.0000627   | 2.1570268 | up |
| ASMM9PARTA031536 | Nr0b2         | 0.0000102   | 2.038954  | up |
| ASMM9PARTA029133 | Sparc         | 0.0000436   | 2.396882  | up |
| ASMM9PARTA038588 | Ccdc117       | 0.000376    | 2.16176   | up |
| ASMM9PARTA024273 | Heph          | 0.000839    | 2.975967  | up |
| ASMM9PARTA031961 | Hpcal1        | 0.0000166   | 2.2622392 | up |
| ASMM9PARTA028676 | Rbbp4         | 0.0000256   | 2.3407652 | up |
| ASMM9PARTA027065 | Kcnip1        | 0.0000282   | 4.726039  | up |
| ASMM9PARTA022180 | Dscaml1       | 0.026648734 | 2.155983  | up |
| ASMM9PARTA032825 | Nmu           | 0.006328255 | 2.2326236 | up |
| ASMM9PARTA028274 | Foxa1         | 6.42E-08    | 2.8207698 | up |
| ASMM9PARTA024585 | Ptprr         | 0.00406898  | 7.350789  | up |
| ASMM9PARTA022268 | 4930420K17Rik | 0.000375    | 2.006079  | up |
| ASMM9PARTA044658 | C1ql2         | 0.0000121   | 2.2450745 | up |
| ASMM9PARTA044769 | Tigd4         | 0.000112    | 5.815109  | up |
| ASMM9PARTA024350 | Lgals3        | 0.001434588 | 2.5295136 | up |
| ASMM9PARTA028740 | Scg5          | 0.0000977   | 2.3858893 | up |
| ASMM9PARTA030689 | Hspa4l        | 0.0000151   | 2.0125673 | up |
| ASMM9PARTA039119 | Otub1         | 0.000301    | 2.2946272 | up |
| ASMM9PARTA027647 | Cdh2          | 0.00000207  | 2.0419476 | up |
| ASMM9PARTA022310 | Mfhas1        | 0.0000667   | 2.2076235 | up |
| ASMM9PARTA023780 | Bcl2l15       | 0.00000555  | 6.2908607 | up |
| ASMM9PARTA035366 | 1700029I01Rik | 0.004849663 | 2.420302  | up |
| ASMM9PARTA032822 | Elovl2        | 0.005735204 | 2.4472451 | up |
| ASMM9PARTA031902 | Eif2ak4       | 0.00000387  | 3.9036727 | up |
| ASMM9PARTA043954 | Pla2g12a      | 0.00188179  | 2.3330312 | up |
| ASMM9PARTA029960 | Irx1          | 0.0000907   | 2.4034426 | up |
| ASMM9PARTA036814 | Asce2         | 0.034301106 | 2.198609  | up |
| ASMM9PARTA029329 | Nr2f2         | 0.0000198   | 4.012704  | up |
| ASMM9PARTA023424 | Fcrl5         | 0.000212    | 3.8824918 | up |
| ASMM9PARTA031116 | Mmp23         | 0.000015    | 2.244075  | up |
| ASMM9PARTA020844 | Gpr101        | 0.0000695   | 2.1989505 | up |
| ASMM9PARTA024036 | Inpp5a        | 0.000493    | 2.1914525 | up |
| ASMM9PARTA023497 | Stxbp5l       | 0.0000586   | 2.9507787 | up |

|                  |               |             |            |    |
|------------------|---------------|-------------|------------|----|
| ASMM9PARTA036324 | Rpap3         | 0.000549    | 2.2583456  | up |
| ASMM9PARTA043472 | Luzp2         | 0.0000599   | 2.5671635  | up |
| ASMM9PARTA023377 | Kctd9         | 0.000752    | 2.0294223  | up |
| ASMM9PARTA044231 | Zfp748        | 0.0000707   | 2.4149058  | up |
| ASMM9PARTA028311 | Htr2c         | 0.003728641 | 2.1024995  | up |
| ASMM9PARTA035109 | Prorsd1       | 0.00000241  | 2.8383548  | up |
| ASMM9PARTA031374 | Aldh1a1       | 0.000068    | 2.2125616  | up |
| ASMM9PARTA029965 | Kcnk7         | 0.00088     | 2.6617348  | up |
| ASMM9PARTA030926 | Xdh           | 0.000617    | 2.58435    | up |
| ASMM9PARTA024013 | Megf11        | 0.0000309   | 2.2931662  | up |
| ASMM9PARTA042250 | Nek1          | 0.00098     | 2.1580672  | up |
| ASMM9PARTA033962 | Popdc3        | 0.00000205  | 2.853729   | up |
| ASMM9PARTA029000 | Tnfsf9        | 0.0000101   | 2.390563   | up |
| ASMM9PARTA029038 | Tll1          | 0.003162227 | 3.25447    | up |
| ASMM9PARTA036347 | Dhrs2         | 0.000478    | 2.3309717  | up |
| ASMM9PARTA041756 | 4932438A13Rik | 0.010479278 | 2.073594   | up |
| ASMM9PARTA028318 | Itih3         | 0.000169    | 2.378268   | up |
| ASMM9PARTA021504 | Prl2c1        | 0.023716394 | 2.8436213  | up |
| ASMM9PARTA019912 | Inadl         | 0.0000607   | 2.3539095  | up |
| ASMM9PARTA021703 | Zscan21       | 0.001603618 | 2.1092527  | up |
| ASMM9PARTA043734 | Prl2c5        | 0.00019     | 3.9286435  | up |
| ASMM9PARTA034289 | Fam107b       | 0.0000527   | 2.6628532  | up |
| ASMM9PARTA036473 | 3110007F17Rik | 0.000112    | 2.1604674  | up |
| ASMM9PARTA020425 | Ldoc1         | 0.0000218   | 2.3029172  | up |
| ASMM9PARTA031598 | Schip1        | 0.0000466   | 2.9829657  | up |
| ASMM9PARTA026984 | App           | 0.000228    | 2.0537932  | up |
| ASMM9PARTA021618 | Scoc          | 0.001918294 | 2.12381    | up |
| ASMM9PARTA030969 | Tnnt3         | 0.014237377 | 105.348335 | up |
| ASMM9PARTA029543 | Aqp4          | 0.000000065 | 2.2935846  | up |
| ASMM9PARTA032569 | Il22          | 0.000000781 | 24.978449  | up |
| ASMM9PARTA031128 | Tal1          | 0.0000101   | 2.477537   | up |
| ASMM9PARTA025388 | Prph          | 0.000312    | 2.0239348  | up |
| ASMM9PARTA044577 | Dand5         | 0.018277878 | 2.1043851  | up |
| ASMM9PARTA041787 | Zfp609        | 0.01374517  | 2.3819363  | up |
| ASMM9PARTA024523 | Celf4         | 0.000777    | 9.330751   | up |
| ASMM9PARTA037989 | Olig3         | 0.000465    | 2.427537   | up |
| ASMM9PARTA021266 | Il20rb        | 0.00000137  | 11.799635  | up |
| ASMM9PARTA042557 | Lingo4        | 0.000318    | 2.3799798  | up |
| ASMM9PARTA038320 | Timp4         | 0.0000368   | 2.0005925  | up |
| ASMM9PARTA030189 | Meis1         | 0.001373908 | 2.7708988  | up |
| ASMM9PARTA025685 | Ccdc85a       | 0.0000166   | 2.1329918  | up |
| ASMM9PARTA041138 | E430025E21Rik | 0.00686088  | 2.171286   | up |
| ASMM9PARTA036809 | 4930503E14Rik | 0.000118    | 2.1801968  | up |
| ASMM9PARTA033172 | Myl1          | 0.022617685 | 4.9668155  | up |
| ASMM9PARTA031682 | Anxa4         | 0.000457    | 2.016557   | up |
| ASMM9PARTA031049 | Sgk1          | 0.000272    | 2.2176924  | up |
| ASMM9PARTA030501 | Klk1b26       | 0.003440333 | 3.764769   | up |
| ASMM9PARTA026905 | Beta-s        | 0.00000967  | 2.5352697  | up |
| ASMM9PARTA020878 | Pak6          | 0.000121    | 2.8478758  | up |
| ASMM9PARTA037349 | Hyls1         | 0.009235193 | 2.3268843  | up |
| ASMM9PARTA022660 | Cartpt        | 0.000106    | 2.1583462  | up |
| ASMM9PARTA021034 | Shisa6        | 0.000236    | 2.0915284  | up |
| ASMM9PARTA034233 | Fabp4         | 0.025578842 | 14.826364  | up |
| ASMM9PARTA030929 | Adam23        | 0.001391964 | 3.0830736  | up |
| ASMM9PARTA033326 | Cryba2        | 0.0000726   | 2.0248675  | up |
| ASMM9PARTA041636 | Nup214        | 0.0000521   | 3.3132715  | up |
| ASMM9PARTA031782 | Plcb4         | 0.00004     | 2.9125206  | up |

|                  |               |             |             |      |
|------------------|---------------|-------------|-------------|------|
| ASMM9PARTA043526 | Eif5          | 0.000889    | 2.544023    | up   |
| ASMM9PARTA031477 | Cartpt        | 0.00000557  | 2.2517643   | up   |
| ASMM9PARTA027539 | Cacng1        | 0.005914503 | 3.1773465   | up   |
| ASMM9PARTA035781 | Prdm16        | 0.03654214  | 2.9617462   | up   |
| ASMM9PARTA028020 | Fgf7          | 0.003777369 | 2.6119907   | up   |
| ASMM9PARTA030182 | Lig1          | 0.04229518  | 2.249699    | up   |
| ASMM9PARTA032436 | Irx4          | 0.00000854  | 3.3709266   | up   |
| ASMM9PARTA023174 | Tmem87a       | 0.0105444   | 4.580938    | up   |
| ASMM9PARTA028279 | Irx3          | 0.00000704  | 2.7918754   | up   |
| ASMM9PARTA038363 | Slc17a6       | 0.00000287  | 2.9070206   | up   |
| ASMM9PARTA044591 | Plac9         | 0.0000113   | 2.8673162   | up   |
| ASMM9PARTA031936 | Shox2         | 0.000354    | 2.7292905   | up   |
| ASMM9PARTA027617 | Cdr2          | 0.0000347   | 2.072941    | up   |
| ASMM9PARTA033919 | Camk2d        | 0.0000853   | 2.371512    | up   |
| ASMM9PARTA039937 | Ces2c         | 0.008924363 | 2.5273514   | up   |
| ASMM9PARTA029191 | Avil          | 0.000164    | 2.6097085   | up   |
| ASMM9PARTA036767 | Rnf6          | 0.000818    | 2.313316    | up   |
| ASMM9PARTA019879 | Ypel4         | 0.000747    | 2.0703413   | up   |
| ASMM9PARTA024554 | Slc25a2       | 0.000607    | 2.7162147   | up   |
| ASMM9PARTA032130 | Dmp1          | 0.000000577 | 3.5742388   | up   |
| ASMM9PARTA032689 | Rbm38         | 0.000169    | 2.0112605   | up   |
| ASMM9PARTA029091 | Sfrp2         | 0.001410236 | 2.3574317   | up   |
| ASMM9PARTA025104 | Tnnt3         | 0.028151358 | 9.886942    | up   |
| ASMM9PARTA027024 | Dcn           | 0.0000282   | 2.4121919   | up   |
| ASMM9PARTA025333 | Tnnt3         | 0.009303493 | 61.182983   | up   |
| ASMM9PARTA041434 | Nphp3         | 0.000469    | 2.7009454   | up   |
| ASMM9PARTA022135 | Cyt11         | 0.000051    | 2.4156404   | up   |
| ASMM9PARTA034700 | Gprasp1       | 0.000421    | 2.3494184   | up   |
| ASMM9PARTA025392 | Tnnt3         | 0.047394775 | 8.658881    | up   |
| ASMM9PARTA020861 | Alpk2         | 0.015779583 | 4.2894406   | up   |
| ASMM9PARTA040038 | Olfir657      | 0.009732459 | 3.1989865   | up   |
| ASMM9PARTA020569 | Thoc2         | 0.037124027 | 2.383962    | up   |
| ASMM9PARTA033242 | Ucn           | 0.00000919  | 3.856744    | up   |
| ASMM9PARTA029404 | Art1          | 0.02242654  | 13.814318   | up   |
| ASMM9PARTA041066 | AI428936      | 0.000901    | 2.3417852   | up   |
| ASMM9PARTA023235 | D0H4S114      | 0.0000371   | 2.058481    | up   |
| ASMM9PARTA029974 | Dlx3          | 0.001408583 | 2.5063183   | up   |
| ASMM9PARTA027262 | Car8          | 2.08E-08    | 12.755496   | up   |
| ASMM9PARTA020002 | Mtus1         | 0.014918658 | 2.256344    | up   |
| ASMM9PARTA031212 | Xirp1         | 0.013895262 | 2.7617493   | up   |
| ASMM9PARTA042475 | A2m           | 0.000128    | 2.4170778   | up   |
| ASMM9PARTA029210 | Ttf1          | 0.006709633 | 2.6899865   | up   |
| ASMM9PARTA028188 | Nefm          | 0.0000484   | 2.4131057   | up   |
| ASMM9PARTA030563 | Pax7          | 0.0000651   | 2.627603    | up   |
| ASMM9PARTA026717 | Rhox3b        | 0.000352    | 2.4762418   | up   |
| ASMM9PARTA028658 | Prkaca        | 0.0000232   | 2.1011724   | up   |
| ASMM9PARTA025002 | Tnnt3         | 0.027619606 | 23.66482    | up   |
| ASMM9PARTA042019 | Lsm12         | 0.000132    | 2.1977196   | up   |
| ASMM9PARTA041303 | Olfm3         | 0.0000484   | 2.3936164   | up   |
| ASMM9PARTA033634 | 4930550L24Rik | 0.00561765  | 3.5129473   | up   |
| ASMM9PARTA030114 | Il16          | 0.0000637   | 2.9721432   | up   |
| ASMM9PARTA020433 | Olfir304      | 0.015489637 | 2.0538113   | up   |
| ASMM9PARTA039495 | Spata20       | 0.000403    | 2.4811966   | up   |
| ASMM9PARTA029989 | Gbx2          | 0.00006     | 2.338181    | up   |
| ASMM9PARTA026767 | 9430070O13Rik | 0.022252211 | 0.452086351 | down |
| ASMM9PARTA020476 | Osm           | 0.000958    | 0.488652511 | down |
| ASMM9PARTA039369 | Cd300ld       | 0.025881946 | 0.344883362 | down |

|                  |               |             |             |      |
|------------------|---------------|-------------|-------------|------|
| ASMM9PARTA023986 | Zfat          | 0.002198375 | 0.435569778 | down |
| ASMM9PARTA031340 | Cd2           | 0.0000567   | 0.172296148 | down |
| ASMM9PARTA032887 | Mos           | 0.024729842 | 0.411311392 | down |
| ASMM9PARTA024347 | Atp6ap11      | 0.000571    | 0.410128955 | down |
| ASMM9PARTA037071 | 1190003J15Rik | 0.000187    | 0.417253081 | down |
| ASMM9PARTA041835 | D630002G06Rik | 0.036431365 | 0.427162257 | down |
| ASMM9PARTA028532 | Junb          | 0.000376    | 0.493952344 | down |
| ASMM9PARTA043124 | Fbxw13        | 0.000131    | 0.209202071 | down |
| ASMM9PARTA025664 | Gm6904        | 0.001071501 | 0.442934079 | down |
| ASMM9PARTA036192 | 5730508B09Rik | 0.000557    | 0.476970982 | down |
| ASMM9PARTA029251 | Tac1          | 0.0000173   | 0.43290598  | down |
| ASMM9PARTA043417 | Cpa6          | 0.017711971 | 0.430763622 | down |
| ASMM9PARTA028804 | Saa1          | 0.001231277 | 0.397798899 | down |
| ASMM9PARTA033542 | Dpys          | 0.000167    | 0.327775614 | down |
| ASMM9PARTA031535 | Mgll          | 0.000297    | 0.400421965 | down |
| ASMM9PARTA030821 | Tsks          | 0.02191947  | 0.461074691 | down |
| ASMM9PARTA039471 | Rin1          | 7.47E-08    | 0.351150166 | down |
| ASMM9PARTA023531 | 9030025P20Rik | 0.001066975 | 0.478101585 | down |
| ASMM9PARTA035576 | Asb11         | 0.000702    | 0.265205519 | down |
| ASMM9PARTA023040 | Synpo         | 0.00000406  | 0.369699366 | down |
| ASMM9PARTA029903 | Dgcr6         | 0.007959221 | 0.330797243 | down |
| ASMM9PARTA043958 | Synrg         | 0.00015     | 0.416018129 | down |
| ASMM9PARTA044426 | Dlx5          | 0.00000106  | 0.233779791 | down |
| ASMM9PARTA024385 | Slc15a2       | 9.72E-08    | 0.04962425  | down |
| ASMM9PARTA036811 | Spag16        | 0.000984    | 0.465421942 | down |
| ASMM9PARTA022725 | Kng2          | 0.00000727  | 0.238688891 | down |
| ASMM9PARTA024109 | Mup13         | 0.000000693 | 0.263233886 | down |
| ASMM9PARTA037199 | Rasd2         | 0.0000382   | 0.341615225 | down |
| ASMM9PARTA031321 | Slc30a3       | 0.00000746  | 0.482242319 | down |
| ASMM9PARTA038435 | Gsx2          | 0.000181    | 0.334285602 | down |
| ASMM9PARTA035300 | Hddc3         | 0.000000454 | 0.279102491 | down |
| ASMM9PARTA022035 | Kcna10        | 0.000681    | 0.375963397 | down |
| ASMM9PARTA042546 | 4931440F15Rik | 0.00001     | 0.323320632 | down |
| ASMM9PARTA023907 | Mup19         | 0.00000847  | 0.248319522 | down |
| ASMM9PARTA034527 | Sostdc1       | 0.0000296   | 0.167226745 | down |
| ASMM9PARTA024076 | Mup8          | 0.00000531  | 0.246651192 | down |
| ASMM9PARTA025656 | Dcaf17        | 0.000226    | 0.433147439 | down |
| ASMM9PARTA037112 | Rpl18a        | 4.79E-09    | 0.064035491 | down |
| ASMM9PARTA042154 | E130012A19Rik | 0.000139    | 0.488572103 | down |
| ASMM9PARTA038544 | 2610018G03Rik | 0.000645    | 0.37081792  | down |
| ASMM9PARTA039206 | Rab40b        | 0.0000351   | 0.411476965 | down |
| ASMM9PARTA020539 | Ffar3         | 0.000978    | 0.28482073  | down |
| ASMM9PARTA029936 | Cyp2d9        | 0.000167    | 0.261223548 | down |
| ASMM9PARTA035292 | Ino80         | 0.015004523 | 0.394612357 | down |
| ASMM9PARTA024121 | Mpped2        | 0.005606    | 0.389266596 | down |
| ASMM9PARTA022139 | Cntnap3       | 0.003140523 | 0.40026999  | down |
| ASMM9PARTA036900 | Rap2b         | 0.000482    | 0.481283603 | down |
| ASMM9PARTA033332 | Trpv4         | 0.00000722  | 0.399645594 | down |
| ASMM9PARTA024486 | Nkx2-1        | 0.0000648   | 0.206837489 | down |
| ASMM9PARTA035363 | 2310046A06Rik | 0.000237    | 0.381426265 | down |
| ASMM9PARTA043876 | Slc17a7       | 0.000129    | 0.443483249 | down |
| ASMM9PARTA029513 | Cd3g          | 0.005643459 | 0.395684616 | down |
| ASMM9PARTA044496 | Gpr6          | 0.000000686 | 0.305557635 | down |
| ASMM9PARTA029838 | Cyp2d10       | 0.000952    | 0.327348851 | down |
| ASMM9PARTA020724 | Lce3f         | 0.002857118 | 0.334797178 | down |
| ASMM9PARTA034327 | Lrrk2         | 0.009622876 | 0.498917076 | down |
| ASMM9PARTA038001 | Rem2          | 0.00000312  | 0.479569477 | down |

|                  |               |             |             |      |
|------------------|---------------|-------------|-------------|------|
| ASMM9PARTA023568 | Mup10         | 0.0000008   | 0.191509154 | down |
| ASMM9PARTA024564 | Meis2         | 0.020248394 | 0.373741673 | down |
| ASMM9PARTA038104 | Prss1         | 0.005254163 | 0.499804402 | down |
| ASMM9PARTA029737 | Dlx5          | 0.001092952 | 0.440921715 | down |
| ASMM9PARTA024716 | Nek3          | 0.0260986   | 0.485719176 | down |
| ASMM9PARTA028744 | Serpinalc     | 0.00000844  | 0.154268613 | down |
| ASMM9PARTA037934 | Cpn1          | 0.002054692 | 0.496724697 | down |
| ASMM9PARTA028840 | Rcvrn         | 0.00797785  | 0.356382909 | down |
| ASMM9PARTA029422 | Wnt10a        | 0.0000369   | 0.371206616 | down |
| ASMM9PARTA033946 | Npy           | 0.00000139  | 0.243790295 | down |
| ASMM9PARTA025050 | Synpr         | 0.0000555   | 0.296299896 | down |
| ASMM9PARTA034613 | Mcm8          | 0.000382    | 0.43542268  | down |
| ASMM9PARTA041882 | Dlgap2        | 0.001340083 | 0.493811676 | down |
| ASMM9PARTA029474 | Areg          | 0.000609    | 0.415910005 | down |
| ASMM9PARTA029528 | Dlx2          | 0.0000111   | 0.206601569 | down |
| ASMM9PARTA025637 | Tpm1          | 0.000122    | 0.47664256  | down |
| ASMM9PARTA035470 | 1700003M02Rik | 0.00000899  | 0.468852356 | down |
| ASMM9PARTA027255 | Ambp          | 0.00000473  | 0.192091552 | down |
| ASMM9PARTA032497 | Fabp1         | 0.000963    | 0.464768783 | down |
| ASMM9PARTA042775 | Myh8          | 0.043965533 | 0.430939379 | down |
| ASMM9PARTA032626 | Cyp3a25       | 0.004287357 | 0.459424332 | down |
| ASMM9PARTA029223 | Apoa1         | 0.000442    | 0.077908305 | down |
| ASMM9PARTA041355 | Sbsn          | 0.000112    | 0.177990322 | down |
| ASMM9PARTA038644 | Spata4        | 0.006757452 | 0.264950038 | down |
| ASMM9PARTA029819 | Fhl2          | 0.000000333 | 0.441765305 | down |
| ASMM9PARTA022248 | C2cd4b        | 0.0000194   | 0.487783891 | down |
| ASMM9PARTA024911 | Mup1          | 0.00000243  | 0.365613642 | down |
| ASMM9PARTA034985 | Kcnv1         | 0.000206    | 0.395460321 | down |
| ASMM9PARTA039407 | Ell3          | 0.003593214 | 0.318624866 | down |
| ASMM9PARTA039643 | Ras10a        | 0.0000109   | 0.421555836 | down |
| ASMM9PARTA037343 | 4930447C04Rik | 0.000196    | 0.493375375 | down |
| ASMM9PARTA037347 | Prss23        | 0.00000158  | 0.376093992 | down |
| ASMM9PARTA029481 | Cnr2          | 0.021912646 | 0.428702636 | down |
| ASMM9PARTA025621 | BC005561      | 0.0000237   | 0.425649775 | down |
| ASMM9PARTA033859 | Scube1        | 0.002698337 | 0.37310384  | down |
| ASMM9PARTA021788 | Thg1l         | 0.001822639 | 0.438995554 | down |
| ASMM9PARTA025009 | Ptk2b         | 0.0000133   | 0.376373429 | down |
| ASMM9PARTA039637 | Neto1         | 0.0000194   | 0.449146429 | down |
| ASMM9PARTA028385 | Hsd3b5        | 0.0000271   | 0.112043537 | down |
| ASMM9PARTA037298 | Spata2L       | 0.00000734  | 0.497100512 | down |
| ASMM9PARTA025133 | Crb2          | 0.0000846   | 0.479205041 | down |
| ASMM9PARTA037841 | Gimap3        | 0.002224498 | 0.468160323 | down |
| ASMM9PARTA027570 | Cxcr5         | 0.000216    | 0.342926367 | down |
| ASMM9PARTA039734 | Dmrt2         | 0.000141    | 0.424886539 | down |
| ASMM9PARTA036425 | Mlflip        | 0.004737627 | 0.336244878 | down |
| ASMM9PARTA041099 | Crygn         | 0.001326628 | 0.411536521 | down |
| ASMM9PARTA036647 | Cnih3         | 0.003571751 | 0.418752104 | down |
| ASMM9PARTA028678 | Nppa          | 0.002488728 | 0.246553977 | down |
| ASMM9PARTA024746 | Myo1b         | 0.000526    | 0.45430975  | down |
| ASMM9PARTA025197 | Kalrn         | 0.0000105   | 0.380450751 | down |
| ASMM9PARTA029830 | Chi3l3        | 0.000372    | 0.373540135 | down |
| ASMM9PARTA037053 | Rasgef1c      | 0.00000589  | 0.361700255 | down |
| ASMM9PARTA019493 | Tmem158       | 0.0000107   | 0.327977612 | down |
| ASMM9PARTA028145 | Lbp           | 0.00000391  | 0.423863211 | down |
| ASMM9PARTA026369 | Fam47e        | 0.031084172 | 0.400323253 | down |
| ASMM9PARTA037196 | Spata16       | 0.004009562 | 0.291892652 | down |
| ASMM9PARTA028854 | Serpinalb     | 0.0000685   | 0.171326666 | down |

|                      |               |             |             |      |
|----------------------|---------------|-------------|-------------|------|
| ASMM9PARTA042935     | Ptpn7         | 0.0000981   | 0.295138845 | down |
| ASMM9PARTA033099     | Stap1         | 0.000468    | 0.318098473 | down |
| ASMM9PARTA031779     | Cldn5         | 0.000193    | 0.498873544 | down |
| ASMM9PARTA024525     | Rdh7          | 0.0000564   | 0.263748581 | down |
| ASMM9PARTA024745     | Palm          | 0.006232396 | 0.476590903 | down |
| ASMM9PARTA028615     | Mup5          | 0.000199    | 0.219583367 | down |
| ASMM9PARTA038804     | Kcne2         | 0.00000038  | 0.040648903 | down |
| ASMM9PARTA020183     | Kcnq2         | 0.000978    | 0.356295599 | down |
| ASMM9PARTA027956     | Folr1         | 0.00000886  | 0.193353138 | down |
| CUST 250 PI426409190 | Gm3286        | 0.001867091 | 0.499941007 | down |
| ASMM9PARTA040898     | Olfr167       | 0.005143871 | 0.254419457 | down |
| ASMM9PARTA037379     | Slc35d3       | 0.0000228   | 0.430735753 | down |
| ASMM9PARTA028599     | Raet1c        | 0.000209    | 0.350996125 | down |
| ASMM9PARTA022992     | Gsg1l         | 0.000677    | 0.288710023 | down |
| ASMM9PARTA034098     | Emid2         | 0.000461    | 0.445201088 | down |
| ASMM9PARTA025229     | Lrriq1        | 0.000754    | 0.407617524 | down |
| ASMM9PARTA028533     | Kcnj4         | 0.000000832 | 0.28194335  | down |
| ASMM9PARTA029564     | Dpp4          | 0.0000212   | 0.374137072 | down |
| CUST 305 PI426409190 | Ccl28         | 0.000161    | 0.215191546 | down |
| ASMM9PARTA042165     | Slc24a5       | 0.000703    | 0.432185045 | down |
| ASMM9PARTA043055     | Cntln         | 0.01939386  | 0.445860517 | down |
| ASMM9PARTA039135     | Wnt9a         | 0.00000649  | 0.3313074   | down |
| ASMM9PARTA029840     | Efnb2         | 0.000642    | 0.466073746 | down |
| ASMM9PARTA030751     | Pcdh10        | 0.0000577   | 0.44293347  | down |
| ASMM9PARTA033039     | Fbxo3         | 0.0000246   | 0.232778987 | down |
| ASMM9PARTA044005     | Fam120c       | 0.002607773 | 0.432206601 | down |
| ASMM9PARTA020791     | Frmpd4        | 0.019704299 | 0.464463438 | down |
| ASMM9PARTA044281     | Trat1         | 0.002789541 | 0.38111133  | down |
| ASMM9PARTA042886     | Clec12a       | 0.000069    | 0.412363686 | down |
| ASMM9PARTA022794     | Rbm8a         | 5.09E-08    | 0.173634654 | down |
| ASMM9PARTA024749     | Myef2         | 0.0000605   | 0.087595044 | down |
| ASMM9PARTA021427     | Pdxdc1        | 7.17E-08    | 0.066147392 | down |
| ASMM9PARTA040145     | Olfr360       | 0.043136913 | 0.45242719  | down |
| ASMM9PARTA030600     | Rgs9          | 4.13E-08    | 0.157634971 | down |
| ASMM9PARTA027393     | Alx4          | 0.019655824 | 0.488700631 | down |
| ASMM9PARTA030794     | Ccl21a        | 0.000125    | 0.373032941 | down |
| ASMM9PARTA029972     | Lhx8          | 0.000451    | 0.273172216 | down |
| ASMM9PARTA029029     | Serpina1e     | 0.00000637  | 0.111211498 | down |
| ASMM9PARTA043911     | Clec18a       | 0.000204    | 0.468546541 | down |
| ASMM9PARTA041884     | Mgat5b        | 0.001188887 | 0.410534614 | down |
| ASMM9PARTA037497     | Dtl           | 0.000063    | 0.33030742  | down |
| ASMM9PARTA042802     | C730048C13Rik | 0.001696692 | 0.228537302 | down |
| ASMM9PARTA036144     | 2010300C02Rik | 0.00000897  | 0.495064749 | down |
| ASMM9PARTA022198     | Ccno          | 0.0000204   | 0.44022172  | down |
| ASMM9PARTA036982     | Trim14        | 0.006627751 | 0.271392603 | down |
| ASMM9PARTA023802     | LOC100048885  | 0.000912    | 0.440673882 | down |
| ASMM9PARTA036624     | Mei1          | 0.000481    | 0.192106904 | down |
| ASMM9PARTA029472     | Alb           | 0.0000183   | 0.128460975 | down |
| ASMM9PARTA023296     | Gm3448        | 0.0000221   | 0.204595836 | down |
| ASMM9PARTA041022     | Homer1        | 0.000195    | 0.4672583   | down |
| ASMM9PARTA025371     | Fbxl16        | 0.0000458   | 0.421689765 | down |
| ASMM9PARTA035719     | Lyzl4         | 0.000707    | 0.410946902 | down |
| ASMM9PARTA043635     | Ppip5k1       | 0.000437    | 0.235961211 | down |
| ASMM9PARTA041980     | Dclk3         | 0.0000132   | 0.443511533 | down |
| ASMM9PARTA030793     | Prkcc         | 0.00039     | 0.481780623 | down |
| ASMM9PARTA029622     | Cleal         | 0.0000439   | 0.179811162 | down |
| ASMM9PARTA022966     | Gm10334       | 0.0000355   | 0.344562629 | down |

|                  |               |             |             |      |
|------------------|---------------|-------------|-------------|------|
| ASMM9PARTA030118 | Krt10         | 0.016283398 | 0.414397839 | down |
| ASMM9PARTA028483 | Pomc          | 0.000386    | 0.438948825 | down |
| ASMM9PARTA020879 | Gpr55         | 0.004020004 | 0.428410303 | down |
| ASMM9PARTA023887 | Plcb1         | 0.00000484  | 0.39348403  | down |
| ASMM9PARTA022657 | Wdr86         | 0.000084    | 0.321698258 | down |
| ASMM9PARTA025643 | Ankrd33b      | 0.030486941 | 0.479541949 | down |
| ASMM9PARTA037277 | 6330527O06Rik | 0.000389    | 0.35357512  | down |
| ASMM9PARTA032248 | Vpreb1        | 0.001076197 | 0.438437846 | down |
| ASMM9PARTA022342 | Htra4         | 0.002256475 | 0.429942355 | down |
| ASMM9PARTA022506 | Gm1337        | 9.39E-08    | 0.115969021 | down |
| ASMM9PARTA038497 | Slco1a5       | 0.00082     | 0.35039958  | down |
| ASMM9PARTA024512 | Tmem116       | 0.008582863 | 0.462072276 | down |
| ASMM9PARTA022895 | Gm7244        | 0.000237    | 0.186893122 | down |
| ASMM9PARTA022009 | Ccl27a        | 0.00000109  | 0.464213503 | down |
| ASMM9PARTA025647 | Acnat1        | 0.0000709   | 0.42080132  | down |
| ASMM9PARTA039741 | Kcna5         | 0.000000857 | 0.379502033 | down |
| ASMM9PARTA033683 | Ms4a4b        | 0.00680673  | 0.435526905 | down |
| ASMM9PARTA037619 | Tlr1          | 0.000246    | 0.300632775 | down |
| ASMM9PARTA042570 | Mylk3         | 0.00083     | 0.27851631  | down |
| ASMM9PARTA027011 | Mup15         | 0.00000139  | 0.219367231 | down |
| ASMM9PARTA026146 | Slc10a1       | 0.000169    | 0.191183533 | down |
| ASMM9PARTA035444 | Pnlip         | 0.00023     | 0.264036413 | down |
| ASMM9PARTA020699 | Tmem171       | 0.014505961 | 0.328212109 | down |
| ASMM9PARTA033794 | Ypel1         | 0.000274    | 0.460009045 | down |
| ASMM9PARTA020062 | Ddn           | 0.00000132  | 0.409100289 | down |
| ASMM9PARTA033750 | Scel          | 0.006426611 | 0.272576786 | down |
| ASMM9PARTA029488 | Cyp8b1        | 0.0000753   | 0.246691059 | down |
| ASMM9PARTA025601 | Mup11         | 0.00000147  | 0.242243309 | down |
| ASMM9PARTA030083 | Neurog1       | 0.003499295 | 0.449113629 | down |
| ASMM9PARTA029588 | Drd1a         | 0.000000133 | 0.083367695 | down |
| ASMM9PARTA028004 | Hpd           | 0.000891    | 0.278931384 | down |
| ASMM9PARTA040029 | Itpka         | 0.0000912   | 0.396902305 | down |
| ASMM9PARTA044070 | Exoc8         | 0.00000456  | 0.32967305  | down |
| ASMM9PARTA030270 | Gdnf          | 0.001346218 | 0.435908256 | down |
| ASMM9PARTA039331 | Gpx6          | 0.009131108 | 0.207561089 | down |
| ASMM9PARTA043423 | Pacsin1       | 0.003091733 | 0.351882094 | down |
| ASMM9PARTA037799 | Clca2         | 0.000532    | 0.462275264 | down |
| ASMM9PARTA038744 | Fam64a        | 0.000234    | 0.403512512 | down |
| ASMM9PARTA020109 | Kcnq2         | 0.00000479  | 0.428725243 | down |
| ASMM9PARTA030509 | Myl4          | 0.00000374  | 0.209806173 | down |
| ASMM9PARTA020324 | Skap1         | 0.000184    | 0.352408476 | down |
| ASMM9PARTA030022 | H2-Q10        | 0.000502    | 0.363219177 | down |
| ASMM9PARTA043826 | Cwh43         | 0.007104415 | 0.447181393 | down |
| ASMM9PARTA025525 | Nfatc1        | 0.012698671 | 0.417379237 | down |
| ASMM9PARTA038893 | Defb9         | 0.0000283   | 0.266064694 | down |
| ASMM9PARTA027895 | Htr1f         | 0.001730357 | 0.290470221 | down |
| ASMM9PARTA031618 | Cd3d          | 0.018658267 | 0.332891808 | down |
| ASMM9PARTA043662 | Vmac          | 0.01991689  | 0.413505161 | down |
| ASMM9PARTA036543 | Ttc9b         | 0.0000502   | 0.408683778 | down |
| ASMM9PARTA026120 | Gpr19         | 0.00033     | 0.45289451  | down |
| ASMM9PARTA041000 | Arhgap15      | 0.000237    | 0.423609682 | down |
| ASMM9PARTA028464 | Mesp2         | 0.00231803  | 0.491156771 | down |
| ASMM9PARTA022663 | Stfal         | 0.001452552 | 0.359268766 | down |
| ASMM9PARTA029526 | Dazl          | 0.0000578   | 0.471517691 | down |
| ASMM9PARTA030528 | Ids           | 0.01330641  | 0.456687568 | down |
| ASMM9PARTA042944 | Sh3pxd2b      | 0.017831616 | 0.38603245  | down |
| ASMM9PARTA021408 | Trpm3         | 0.00089     | 0.328878174 | down |



|                  |               |             |             |      |
|------------------|---------------|-------------|-------------|------|
| ASMM9PARTA019942 | Tmem232       | 0.000842    | 0.468943293 | down |
| ASMM9PARTA022042 | Hs3st2        | 0.000012    | 0.335948367 | down |
| ASMM9PARTA024855 | C2cd4a        | 0.001719892 | 0.473813287 | down |
| ASMM9PARTA040559 | Olfr641       | 0.006276009 | 0.482602703 | down |
| ASMM9PARTA033543 | Folr4         | 0.024941446 | 0.363060813 | down |
| ASMM9PARTA043314 | Spata21       | 0.0000566   | 0.416377978 | down |
| ASMM9PARTA033641 | Gpr88         | 0.000000817 | 0.064518789 | down |
| ASMM9PARTA033394 | Kcnmb4        | 0.0000262   | 0.454633137 | down |
| ASMM9PARTA038599 | Cdhr1         | 0.001211736 | 0.447039938 | down |
| ASMM9PARTA038797 | Mbtd1         | 0.00000799  | 0.289010767 | down |
| ASMM9PARTA043103 | 4933400C05Rik | 0.000329    | 0.499477871 | down |
| ASMM9PARTA027245 | Mup12         | 8.94E-09    | 0.258872901 | down |
| ASMM9PARTA032318 | Syt5          | 0.000793    | 0.408389146 | down |
| ASMM9PARTA034590 | Fam187a       | 0.000324    | 0.334695399 | down |
| ASMM9PARTA028286 | Ltb           | 0.011367448 | 0.461843847 | down |
| ASMM9PARTA035746 | Steap1        | 0.0000137   | 0.173353278 | down |
| ASMM9PARTA023758 | Samd3         | 0.000278    | 0.453253579 | down |
| ASMM9PARTA029274 | Thrb          | 0.018455353 | 0.202143318 | down |
| ASMM9PARTA035865 | Krtap4-13     | 0.0000392   | 0.435048594 | down |
| ASMM9PARTA023546 | Serac1        | 0.005735342 | 0.370959    | down |
| ASMM9PARTA037291 | Tmem116       | 0.010050296 | 0.38057123  | down |
| ASMM9PARTA040990 | Rgs13         | 0.001450367 | 0.19450609  | down |
| ASMM9PARTA025728 | Gm7455        | 0.001019644 | 0.419449944 | down |
| ASMM9PARTA037288 | Ocel1         | 0.000356    | 0.385815062 | down |
| ASMM9PARTA033122 | Spib          | 0.005946528 | 0.446119634 | down |
| ASMM9PARTA040340 | Olfr1238      | 0.007549198 | 0.288090099 | down |
| ASMM9PARTA041362 | Pus7l         | 0.034232195 | 0.472554886 | down |
| ASMM9PARTA042804 | Kif6          | 0.003215302 | 0.476097796 | down |
| ASMM9PARTA033257 | Doc2g         | 0.000000305 | 0.400275117 | down |
| ASMM9PARTA030637 | Saa2          | 0.000265    | 0.429018411 | down |
| ASMM9PARTA033004 | Cldn9         | 0.0000199   | 0.444997032 | down |
| ASMM9PARTA029272 | Tbr1          | 0.01312867  | 0.237979591 | down |
| ASMM9PARTA030000 | Hal           | 0.04055374  | 0.454654344 | down |
| ASMM9PARTA031999 | Bhmt          | 0.000000616 | 0.235375862 | down |
| ASMM9PARTA021231 | Iqgap3        | 0.00160808  | 0.401064184 | down |
| ASMM9PARTA023055 | Calml4        | 0.000327    | 0.39455598  | down |
| ASMM9PARTA024843 | Lmo4          | 0.000306    | 0.435187579 | down |
| ASMM9PARTA024174 | Utp14b        | 0.009906592 | 0.442702107 | down |
| ASMM9PARTA028812 | Serpina1d     | 0.0000055   | 0.164241261 | down |
| ASMM9PARTA041388 | Zdhhc8        | 0.003374993 | 0.428042924 | down |
| ASMM9PARTA024343 | Cnih3         | 0.0000244   | 0.483315233 | down |
| ASMM9PARTA023189 | Zfp385b       | 0.047750082 | 0.424597403 | down |
| ASMM9PARTA042712 | 6530418L21Rik | 0.000197    | 0.48622914  | down |
| ASMM9PARTA019903 | Ces5a         | 0.010479536 | 0.499057106 | down |
| ASMM9PARTA034801 | Fam132a       | 0.0000485   | 0.470912001 | down |
| ASMM9PARTA024138 | Mup7          | 0.000000384 | 0.240719841 | down |
| ASMM9PARTA020035 | Gm5409        | 0.000341    | 0.262294965 | down |
| ASMM9PARTA021692 | Mup3          | 0.00000519  | 0.20712954  | down |
| ASMM9PARTA044724 | Olfr741       | 0.039275255 | 0.340936827 | down |
| ASMM9PARTA034885 | 4930549C01Rik | 0.001364725 | 0.48323029  | down |
| ASMM9PARTA029754 | Avp           | 0.000159    | 0.238787181 | down |
| ASMM9PARTA038807 | Vmn1r4        | 0.009277049 | 0.363759076 | down |
| ASMM9PARTA036034 | Lrrc34        | 0.004095026 | 0.485777267 | down |
| ASMM9PARTA028663 | Prg2          | 0.00021     | 0.303465298 | down |
| ASMM9PARTA023422 | Arhgef16      | 0.003660981 | 0.491400347 | down |
| ASMM9PARTA044240 | Raet1e        | 0.000147    | 0.408908213 | down |
| ASMM9PARTA036074 | Serpina9      | 0.00000128  | 0.139742879 | down |

|                  |               |             |             |      |
|------------------|---------------|-------------|-------------|------|
| ASMM9PARTA028515 | Lgals7        | 0.000832    | 0.411405205 | down |
| ASMM9PARTA027144 | Mup17         | 9.18E-08    | 0.237956385 | down |
| ASMM9PARTA028014 | F5            | 0.001756891 | 0.094705543 | down |
| ASMM9PARTA031603 | Pde10a        | 0.000667    | 0.336120139 | down |
| ASMM9PARTA032589 | Tbx21         | 0.008143852 | 0.407656507 | down |
| ASMM9PARTA026982 | Adrb1         | 0.0000497   | 0.493028503 | down |
| ASMM9PARTA029518 | Cldn3         | 0.0000986   | 0.474748462 | down |
| ASMM9PARTA035348 | Iqcf3         | 0.00000504  | 0.251657903 | down |
| ASMM9PARTA026871 | Ccl27b        | 0.000918    | 0.463315855 | down |
| ASMM9PARTA043728 | Me3           | 0.00000145  | 0.382131121 | down |
| ASMM9PARTA032630 | Copz2         | 0.000618    | 0.360385464 | down |
| ASMM9PARTA028873 | Psp           | 0.01353761  | 0.460102087 | down |
| ASMM9PARTA022196 | Efcab3        | 0.000194    | 0.308778781 | down |
| ASMM9PARTA035371 | Pnma1         | 0.000145    | 0.493553841 | down |
| ASMM9PARTA021245 | Baiap2        | 0.001763001 | 0.446760051 | down |
| ASMM9PARTA043655 | Aldh8a1       | 0.00626015  | 0.477983689 | down |
| ASMM9PARTA038944 | Upb1          | 0.000268    | 0.310357447 | down |
| ASMM9PARTA032151 | Igfbpl1       | 0.001696612 | 0.356494661 | down |
| ASMM9PARTA019794 | Zfp457        | 0.00000806  | 0.419589598 | down |
| ASMM9PARTA025617 | Ptp4a3        | 0.00012     | 0.464946887 | down |
| ASMM9PARTA025047 | 1700024P16Rik | 0.0000138   | 0.365314819 | down |
| ASMM9PARTA029071 | Tgm3          | 0.004360132 | 0.25541814  | down |
| ASMM9PARTA028583 | Mup2          | 0.000000304 | 0.200158125 | down |
| ASMM9PARTA043495 | Hist1h2ac     | 0.000478    | 0.247768443 | down |
| ASMM9PARTA038077 | Kcnh7         | 0.000887    | 0.482377798 | down |
| ASMM9PARTA036492 | Zswim2        | 0.002380232 | 0.381945337 | down |
| ASMM9PARTA031215 | Zscan21       | 0.001165335 | 0.391873761 | down |
| ASMM9PARTA021779 | Nme2          | 0.0000443   | 0.391396357 | down |
| ASMM9PARTA039721 | Hkdc1         | 0.0000017   | 0.209026998 | down |
| ASMM9PARTA037178 | 1700027A23Rik | 0.035409767 | 0.488726712 | down |
| ASMM9PARTA040779 | Zc3h12a       | 0.0000529   | 0.458695208 | down |
| ASMM9PARTA030354 | Krt18         | 0.00358591  | 0.211399038 | down |
| ASMM9PARTA032678 | Extl3         | 0.008541565 | 0.481504451 | down |
| ASMM9PARTA037818 | Cecr6         | 0.00000795  | 0.319504385 | down |
| ASMM9PARTA032072 | Rgs14         | 0.00000326  | 0.256738249 | down |
| ASMM9PARTA027052 | Mup14         | 0.000000115 | 0.198829254 | down |
| ASMM9PARTA026834 | Kif17         | 0.0000107   | 0.20289481  | down |
| ASMM9PARTA038186 | Cacng6        | 0.011634019 | 0.270069565 | down |
| ASMM9PARTA037382 | Pbp2          | 3.65E-08    | 0.092656036 | down |
| ASMM9PARTA027458 | Arx           | 0.00000244  | 0.331524283 | down |
| ASMM9PARTA024920 | Hsd17b13      | 0.006204337 | 0.436534116 | down |
| ASMM9PARTA021544 | Mup2          | 0.000000852 | 0.243681402 | down |
| ASMM9PARTA036026 | Mettl7b       | 0.015865378 | 0.416268783 | down |
| ASMM9PARTA033165 | Aurkc         | 0.002146789 | 0.460917131 | down |
| ASMM9PARTA041403 | Ptk2b         | 0.0000207   | 0.465016484 | down |
| ASMM9PARTA021757 | Arl4a         | 0.004045966 | 0.492928157 | down |
| ASMM9PARTA026647 | Arpp21        | 0.00000417  | 0.42627672  | down |
| ASMM9PARTA036056 | Ankrd33b      | 0.034586582 | 0.326527254 | down |
| ASMM9PARTA023928 | Prdm12        | 0.00000133  | 0.040939831 | down |
| ASMM9PARTA032107 | Stx1a         | 0.00000303  | 0.414641007 | down |
| ASMM9PARTA019931 | Gplbb         | 0.0000432   | 0.387638142 | down |
| ASMM9PARTA027327 | Hrk           | 0.0000198   | 0.466530278 | down |
| ASMM9PARTA043801 | Fgb           | 0.002688705 | 0.318784132 | down |
| ASMM9PARTA030247 | H2-Ea-ps      | 0.0000609   | 0.211806537 | down |
| ASMM9PARTA029902 | Cyp21a1       | 0.001671015 | 0.486479281 | down |
| ASMM9PARTA025240 | Zfp605        | 0.0000085   | 0.342701349 | down |
| ASMM9PARTA040940 | Olfir520      | 0.011228737 | 0.334146334 | down |

|                  |              |             |             |      |
|------------------|--------------|-------------|-------------|------|
| ASMM9PARTA027124 | Alx3         | 0.00000651  | 0.305562583 | down |
| ASMM9PARTA033533 | Pvrl3        | 0.000378    | 0.396664527 | down |
| ASMM9PARTA029980 | Celf2        | 0.0000208   | 0.478995726 | down |
| ASMM9PARTA031893 | Prss30       | 0.007131813 | 0.384441794 | down |
| ASMM9PARTA029562 | Col6a1       | 0.0000977   | 0.366510526 | down |
| ASMM9PARTA042840 | Casc1        | 0.01858521  | 0.483804172 | down |
| ASMM9PARTA037618 | Akr1c6       | 0.000099    | 0.360744635 | down |
| ASMM9PARTA022728 | Kif19a       | 0.018955346 | 0.409161184 | down |
| ASMM9PARTA019886 | Mup21        | 0.011602221 | 0.417094675 | down |
| ASMM9PARTA030904 | Ptger3       | 0.0000484   | 0.491593699 | down |
| ASMM9PARTA040373 | Olfr539      | 0.03280855  | 0.367703458 | down |
| ASMM9PARTA031468 | Ahsg         | 0.000318    | 0.463748673 | down |
| ASMM9PARTA043607 | Jakmip1      | 0.000576    | 0.427614909 | down |
| ASMM9PARTA029867 | Dlx1         | 0.000966    | 0.296238497 | down |
| ASMM9PARTA044501 | Tas2r135     | 0.006770704 | 0.386129189 | down |
| ASMM9PARTA029376 | Cst7         | 0.008895044 | 0.446155003 | down |
| ASMM9PARTA043518 | Lingo1       | 0.00000721  | 0.477384232 | down |
| ASMM9PARTA041595 | Fam132b      | 0.000235    | 0.35978574  | down |
| ASMM9PARTA031347 | Wfs1         | 0.00000463  | 0.42589563  | down |
| ASMM9PARTA029787 | Adam18       | 0.000525    | 0.249828905 | down |
| ASMM9PARTA044787 | Kcnf1        | 0.000000429 | 0.428665606 | down |
| ASMM9PARTA032969 | Extl1        | 0.000000461 | 0.354690124 | down |
| ASMM9PARTA028803 | Rxrg         | 0.000791    | 0.339307406 | down |
| ASMM9PARTA031895 | Dkk1         | 0.0000125   | 0.209419917 | down |
| ASMM9PARTA029412 | Casq1        | 0.006500153 | 0.408109212 | down |
| ASMM9PARTA044103 | Tcte3        | 0.000712    | 0.4682233   | down |
| ASMM9PARTA029639 | Emx1         | 0.0000499   | 0.415882831 | down |
| ASMM9PARTA041662 | Shisa7       | 0.0000156   | 0.40882212  | down |
| ASMM9PARTA043698 | Kcns2        | 0.000136    | 0.472383872 | down |
| ASMM9PARTA031080 | Sh3bp2       | 0.001149456 | 0.470393968 | down |
| ASMM9PARTA023494 | Wtap         | 3.03E-09    | 0.031338052 | down |
| ASMM9PARTA019803 | Sp9          | 0.000008    | 0.369539113 | down |
| ASMM9PARTA022493 | Chrna10      | 0.000196    | 0.068845726 | down |
| ASMM9PARTA028739 | Cxcl5        | 0.000186    | 0.298476074 | down |
| ASMM9PARTA034114 | Lrrc57       | 0.018392675 | 0.440025338 | down |
| ASMM9PARTA029853 | Gnal         | 0.000593    | 0.386547976 | down |
| ASMM9PARTA027417 | Adh1         | 0.00000265  | 0.498736377 | down |
| ASMM9PARTA027349 | LOC100048884 | 0.000000371 | 0.235953488 | down |
| ASMM9PARTA024051 | Slc6a18      | 0.04500027  | 0.47534007  | down |
| ASMM9PARTA035886 | Otud1        | 0.0000946   | 0.485737296 | down |
| ASMM9PARTA039876 | Gimap7       | 0.045070495 | 0.493111625 | down |
| ASMM9PARTA020403 | Mup20        | 0.00000165  | 0.146485698 | down |
| ASMM9PARTA032320 | Vpreb2       | 0.032925587 | 0.246151998 | down |
| ASMM9PARTA031630 | Oprd1        | 0.002697941 | 0.32093487  | down |
| ASMM9PARTA031920 | Matn2        | 0.000139    | 0.356933363 | down |
| ASMM9PARTA040156 | Sord         | 0.000456    | 0.416700003 | down |
| ASMM9PARTA021430 | Cypt8        | 0.033588585 | 0.25303629  | down |
| ASMM9PARTA037044 | Sash3        | 0.006988749 | 0.419684231 | down |
| ASMM9PARTA023313 | Lrrc10b      | 0.0000606   | 0.145081104 | down |
| ASMM9PARTA043309 | Cnksr2       | 0.000000854 | 0.409904271 | down |
| ASMM9PARTA030452 | Ptpu         | 0.048888586 | 0.178223034 | down |
| ASMM9PARTA023064 | Kif21a       | 0.000337    | 0.473850849 | down |
| ASMM9PARTA029861 | Nr4a1        | 0.00000712  | 0.495284397 | down |
| ASMM9PARTA027638 | H2-Oa        | 0.001764614 | 0.339601229 | down |
| ASMM9PARTA032080 | Ttr          | 2.53E-08    | 0.023502838 | down |
| ASMM9PARTA042398 | Sp110        | 0.005624052 | 0.333696685 | down |
| ASMM9PARTA020753 | Tmem90a      | 0.0000035   | 0.412804553 | down |

|                  |               |             |             |      |
|------------------|---------------|-------------|-------------|------|
| ASMM9PARTA024030 | Spdya         | 0.022558821 | 0.488107576 | down |
| ASMM9PARTA039413 | Cdca7l        | 0.024608998 | 0.318074302 | down |
| ASMM9PARTA038922 | Akr1c18       | 0.000137    | 0.321200385 | down |
| ASMM9PARTA026977 | 1700027A23Rik | 0.009445014 | 0.421691347 | down |
| ASMM9PARTA029837 | Cyp1a2        | 0.033267375 | 0.318228774 | down |
| ASMM9PARTA029700 | Usp17l5       | 0.020234888 | 0.255496888 | down |
| ASMM9PARTA042085 | Dact2         | 0.000483    | 0.441092397 | down |
| ASMM9PARTA043232 | Sntn          | 0.0000823   | 0.45459484  | down |
| ASMM9PARTA044515 | Cd200r4       | 0.000637    | 0.45578357  | down |
| ASMM9PARTA030909 | S100a5        | 1.78E-09    | 0.006571571 | down |
| ASMM9PARTA021134 | Gm4925        | 0.030946357 | 0.413789981 | down |
| ASMM9PARTA038735 | Calml4        | 0.0000365   | 0.388611567 | down |
| ASMM9PARTA030666 | Serpinb8      | 0.0000342   | 0.248758286 | down |
| ASMM9PARTA032454 | Nptx2         | 0.00000167  | 0.471727374 | down |
| ASMM9PARTA021303 | Gm904         | 0.031213142 | 0.284344363 | down |
| ASMM9PARTA026985 | Aqp1          | 0.00000908  | 0.2612922   | down |
| ASMM9PARTA032496 | Ear7          | 0.000302    | 0.162439971 | down |
| ASMM9PARTA036763 | Arpp21        | 0.0000241   | 0.233984547 | down |
| ASMM9PARTA024104 | Ano3          | 0.00000844  | 0.333681808 | down |
| ASMM9PARTA037707 | Actn2         | 0.001058476 | 0.311369864 | down |
| ASMM9PARTA031112 | Hcst          | 0.004789569 | 0.481713598 | down |
| ASMM9PARTA039330 | Ifi27l2b      | 0.027126346 | 0.227597934 | down |
| ASMM9PARTA042899 | C130050O18Rik | 0.0044037   | 0.371811567 | down |
| ASMM9PARTA041681 | Clic6         | 0.000163    | 0.147663244 | down |
| ASMM9PARTA039062 | Syt17         | 0.000723    | 0.230432512 | down |
| ASMM9PARTA027690 | Ear2          | 0.000088    | 0.497211588 | down |
| ASMM9PARTA038827 | Fgg           | 0.000139    | 0.119546112 | down |
| ASMM9PARTA028365 | Lmo2          | 0.000000168 | 0.443729704 | down |
| ASMM9PARTA041439 | Zbbx          | 0.002242688 | 0.421385801 | down |
| ASMM9PARTA037765 | Mesdc1        | 0.000000474 | 0.1469304   | down |
| ASMM9PARTA021098 | Trpm3         | 0.0000562   | 0.260835226 | down |
| ASMM9PARTA033518 | Chia          | 0.000694    | 0.30522827  | down |
| ASMM9PARTA044316 | Phactr1       | 0.002261274 | 0.295423244 | down |
| ASMM9PARTA031019 | Ccl3          | 0.002990186 | 0.46892658  | down |
| ASMM9PARTA034000 | 1500015O10Rik | 0.00000964  | 0.395420321 | down |
| ASMM9PARTA031245 | Tcf21         | 0.03712478  | 0.379334465 | down |
| ASMM9PARTA032373 | Gpr56         | 0.03331314  | 0.478418059 | down |
| ASMM9PARTA037945 | Ocm           | 0.00009     | 0.24254921  | down |
| ASMM9PARTA028493 | Icam5         | 0.0000405   | 0.397271097 | down |
| ASMM9PARTA039576 | Tmem184a      | 0.000617    | 0.334750219 | down |
| ASMM9PARTA028309 | Hlx           | 0.027598886 | 0.333741076 | down |
| ASMM9PARTA038969 | Olfml3        | 0.0000386   | 0.471053969 | down |
| ASMM9PARTA043294 | 3110035E14Rik | 0.0000299   | 0.486688628 | down |
| ASMM9PARTA044092 | Zfp811        | 0.000501    | 0.454742275 | down |
| ASMM9PARTA042997 | 4833427G06Rik | 0.000173    | 0.395600714 | down |
| ASMM9PARTA034826 | 1300014I06Rik | 0.00000409  | 0.075304193 | down |
| ASMM9PARTA039480 | Rgs9bp        | 0.011031129 | 0.474324574 | down |
| ASMM9PARTA033105 | Slc16a8       | 0.00000483  | 0.122152876 | down |
| ASMM9PARTA024981 | Mup1          | 0.00000201  | 0.192426738 | down |
| ASMM9PARTA035663 | 2010001M09Rik | 0.000167    | 0.445064429 | down |
| ASMM9PARTA024133 | Gpr52         | 0.000442    | 0.294673896 | down |
| ASMM9PARTA033199 | Arhgap31      | 0.042125855 | 0.434491499 | down |
| ASMM9PARTA028030 | Grin2b        | 0.0000158   | 0.480857658 | down |
| ASMM9PARTA028098 | Cd79b         | 0.0000194   | 0.232821244 | down |
| ASMM9PARTA021726 | C030030A07Rik | 0.00000033  | 0.047905447 | down |
| ASMM9PARTA038214 | Ftcd          | 0.001861306 | 0.371297376 | down |
| ASMM9PARTA021267 | Lrrc8b        | 0.0000105   | 0.434414301 | down |

|                  |               |             |             |      |
|------------------|---------------|-------------|-------------|------|
| ASMM9PARTA029391 | Ezr           | 0.00000115  | 0.494731114 | down |
| ASMM9PARTA020808 | Rprml         | 0.00000241  | 0.383029187 | down |
| ASMM9PARTA039168 | Defb11        | 7.53E-08    | 0.010289556 | down |
| ASMM9PARTA031186 | Prss3         | 0.0000034   | 0.200648335 | down |
| ASMM9PARTA031616 | Adra1d        | 0.0000146   | 0.379005376 | down |
| ASMM9PARTA029005 | Uox           | 0.003978182 | 0.354838989 | down |
| ASMM9PARTA029095 | St8sia3       | 0.0000291   | 0.422561077 | down |
| ASMM9PARTA035887 | Cage1         | 0.004676535 | 0.251412688 | down |
| ASMM9PARTA030596 | Rasgrp1       | 0.0000263   | 0.403056896 | down |
| ASMM9PARTA024629 | Lrrc57        | 0.001721961 | 0.419265203 | down |
| ASMM9PARTA033853 | Pde6h         | 0.000234    | 0.207052485 | down |
| ASMM9PARTA032344 | Agxt          | 0.000216    | 0.360265886 | down |
| ASMM9PARTA022993 | Cldn20        | 0.004639955 | 0.493985846 | down |
| ASMM9PARTA029204 | Serpina1a     | 0.00000194  | 0.151836845 | down |
| ASMM9PARTA022341 | 6330545A04Rik | 0.000197    | 0.473756743 | down |
| ASMM9PARTA037816 | Arpp21        | 0.005381466 | 0.450126501 | down |
| ASMM9PARTA029649 | Neurod6       | 0.000112    | 0.407858204 | down |
| ASMM9PARTA039879 | Cplx3         | 0.046604663 | 0.410838647 | down |
| ASMM9PARTA021132 | Gm5464        | 0.042043246 | 0.282848241 | down |
| ASMM9PARTA022526 | Neurl1b       | 0.0000148   | 0.385882891 | down |
| ASMM9PARTA042283 | Tnks          | 0.000736    | 0.406309004 | down |
| ASMM9PARTA031376 | Crabp1        | 0.0000437   | 0.298028642 | down |
| ASMM9PARTA021102 | Slc38a6       | 0.000815    | 0.47376489  | down |
| ASMM9PARTA023217 | Rad51ap2      | 0.000554    | 0.42084237  | down |
| ASMM9PARTA039245 | Ccdc21        | 0.0000508   | 0.184061127 | down |
| ASMM9PARTA037688 | Fcrls         | 0.00000577  | 0.314456351 | down |
| ASMM9PARTA030183 | Lmo4          | 0.00000263  | 0.444368171 | down |
| ASMM9PARTA040044 | Camkv         | 0.0000616   | 0.431609603 | down |
| ASMM9PARTA025273 | Efemp2        | 0.00045     | 0.490483733 | down |
| ASMM9PARTA034600 | Camk2n1       | 0.00000024  | 0.089560641 | down |
| ASMM9PARTA032643 | Pdyn          | 0.0000172   | 0.206859032 | down |
| ASMM9PARTA037977 | Krt8          | 0.010386748 | 0.453967678 | down |
| ASMM9PARTA039789 | Cyp2c70       | 0.005116757 | 0.361539539 | down |
| ASMM9PARTA030522 | Pou2f3        | 0.004801637 | 0.477644312 | down |
| ASMM9PARTA019655 | Cyp2c44       | 0.0000653   | 0.315705396 | down |
| ASMM9PARTA028417 | Prss12        | 0.000944    | 0.362782585 | down |
| ASMM9PARTA028427 | Klra2         | 0.000753    | 0.335705563 | down |
| ASMM9PARTA033027 | Hspb3         | 0.00611546  | 0.341625612 | down |
| ASMM9PARTA037597 | Aldh1a3       | 0.00646126  | 0.409539569 | down |
| ASMM9PARTA044604 | Irgc1         | 0.000239    | 0.230403279 | down |
| ASMM9PARTA034368 | Klhl10        | 0.019284684 | 0.392400366 | down |
| ASMM9PARTA027435 | Cort          | 0.00000644  | 0.318111588 | down |
| ASMM9PARTA041911 | Rspo2         | 0.001337609 | 0.455847999 | down |
| ASMM9PARTA035258 | Rasl11b       | 0.0000154   | 0.4323772   | down |
| ASMM9PARTA035862 | Cst12         | 0.048235975 | 0.380437768 | down |
| ASMM9PARTA036919 | 4930563D23Rik | 0.000732    | 0.347832693 | down |
| ASMM9PARTA041635 | Tmem132d      | 0.023052653 | 0.367791336 | down |
| ASMM9PARTA041806 | St6gal2       | 0.046759516 | 0.408202919 | down |
| ASMM9PARTA040011 | Kcnip2        | 0.000667    | 0.463640049 | down |
| ASMM9PARTA036385 | Amdhd1        | 0.00809693  | 0.351826928 | down |
| ASMM9PARTA022906 | Apold1        | 0.000171    | 0.463313773 | down |
| ASMM9PARTA033534 | Pvrl3         | 0.029569859 | 0.349675524 | down |
| ASMM9PARTA042913 | Dmrt3         | 0.00000511  | 0.432159028 | down |
| ASMM9PARTA036300 | Pebp4         | 0.012370867 | 0.414217948 | down |
| ASMM9PARTA029190 | Adora2a       | 7.49E-08    | 0.080057033 | down |
| ASMM9PARTA034317 | Eid3          | 0.030599816 | 0.425848275 | down |
| ASMM9PARTA027162 | Cckbr         | 0.000202    | 0.361715915 | down |

|                      |               |             |             |      |
|----------------------|---------------|-------------|-------------|------|
| ASMM9PARTA027287     | Ccl27b        | 0.00000899  | 0.407475795 | down |
| ASMM9PARTA022057     | Ccdc90a       | 0.000238    | 0.334822467 | down |
| ASMM9PARTA043502     | Rnf24         | 0.026811577 | 0.366931973 | down |
| ASMM9PARTA022859     | Akap5         | 0.0000251   | 0.352882332 | down |
| ASMM9PARTA039800     | Lrrc67        | 0.000721    | 0.445708772 | down |
| ASMM9PARTA032665     | Ngef          | 0.000044    | 0.374574343 | down |
| ASMM9PARTA027477     | Cr2           | 0.001127469 | 0.150615847 | down |
| ASMM9PARTA029467     | Zfp185        | 0.009606877 | 0.462801004 | down |
| ASMM9PARTA040989     | Acat3         | 0.00000378  | 0.471443045 | down |
| ASMM9PARTA032247     | Spint1        | 0.000117    | 0.151463906 | down |
| ASMM9PARTA029905     | Dlx6          | 0.006954233 | 0.12914653  | down |
| ASMM9PARTA023153     | Dclk1         | 0.00000439  | 0.474714724 | down |
| ASMM9PARTA042339     | Fam171b       | 0.0000253   | 0.27883114  | down |
| ASMM9PARTA020570     | Gm1060        | 0.000258    | 0.463459422 | down |
| ASMM9PARTA029811     | Dsg1a         | 0.000413    | 0.228038782 | down |
| ASMM9PARTA040858     | Neurl3        | 0.003668207 | 0.415740449 | down |
| CUST 292 PI426409190 | Gm13298       | 0.0000412   | 0.383049449 | down |
| ASMM9PARTA033719     | Apoc3         | 0.0000179   | 0.371161976 | down |
| ASMM9PARTA026413     | Gm13476       | 0.025168736 | 0.493887403 | down |
| ASMM9PARTA033799     | Rprm          | 0.00000914  | 0.430396161 | down |
| ASMM9PARTA035223     | 1110059M19Rik | 0.00000468  | 0.077540015 | down |
